# Supplementary material
Source: PubMed Central journal article supplement (PMC4259117)

# Supporting Information Chemistry and Biology

## Table of Contents:

|                                                                                       |            |
|---------------------------------------------------------------------------------------|------------|
| 1. NMR Spectra, LCMS, HRMS, and AHPLC Chromatograms of final compounds 1'a-c, 1a-u... | S2-S70     |
| 2. NMR Spectra, LCMS, and AHPLC Chromatograms of Compound 6 and Hydrazones 7...       | S71-S112   |
| 3. NMR Spectra, LCMS, and AHPLC Chromatograms of Selected 5 and 5* .....              | S112-S148  |
| 4. Western Blot Membranes.....                                                        | S149- S153 |

1a

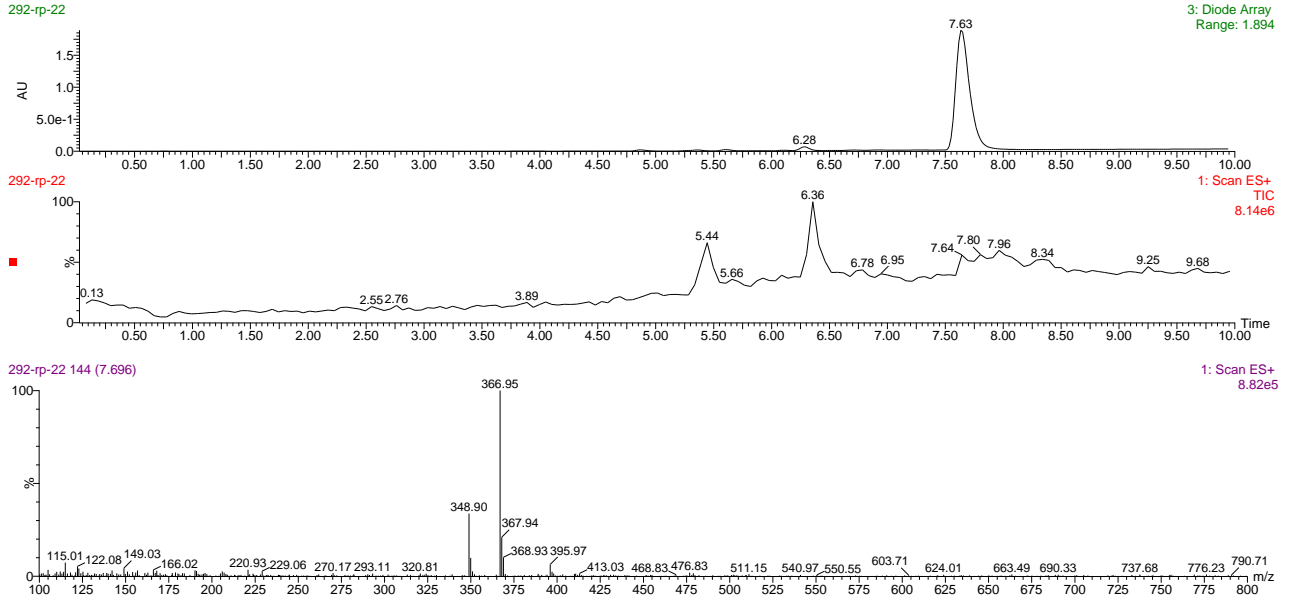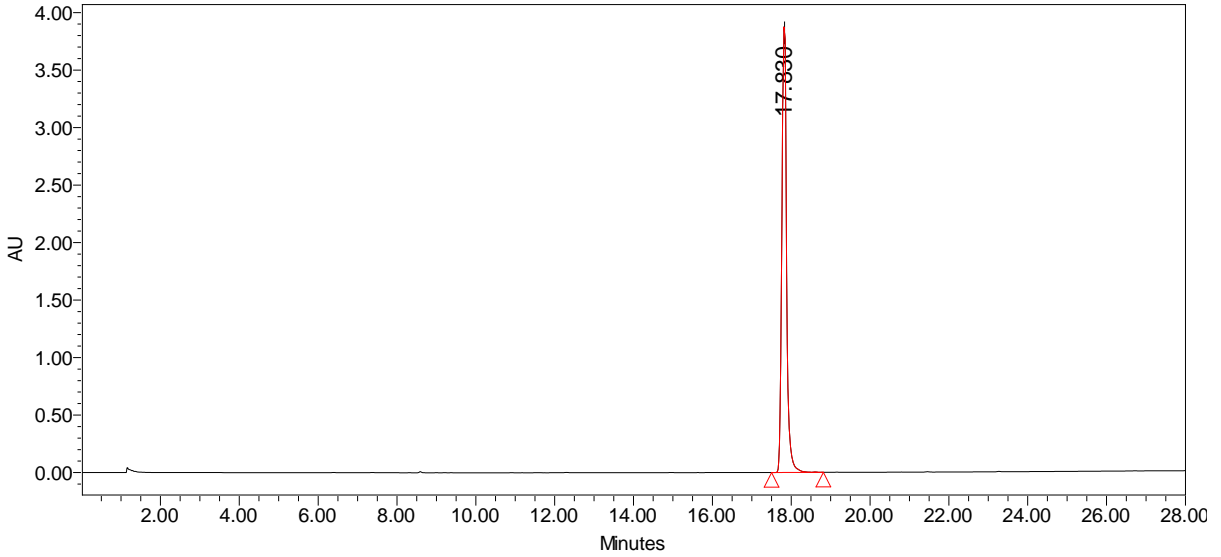

| Retention Time | % Area |
|----------------|--------|
| 17.830         | 100.00 |

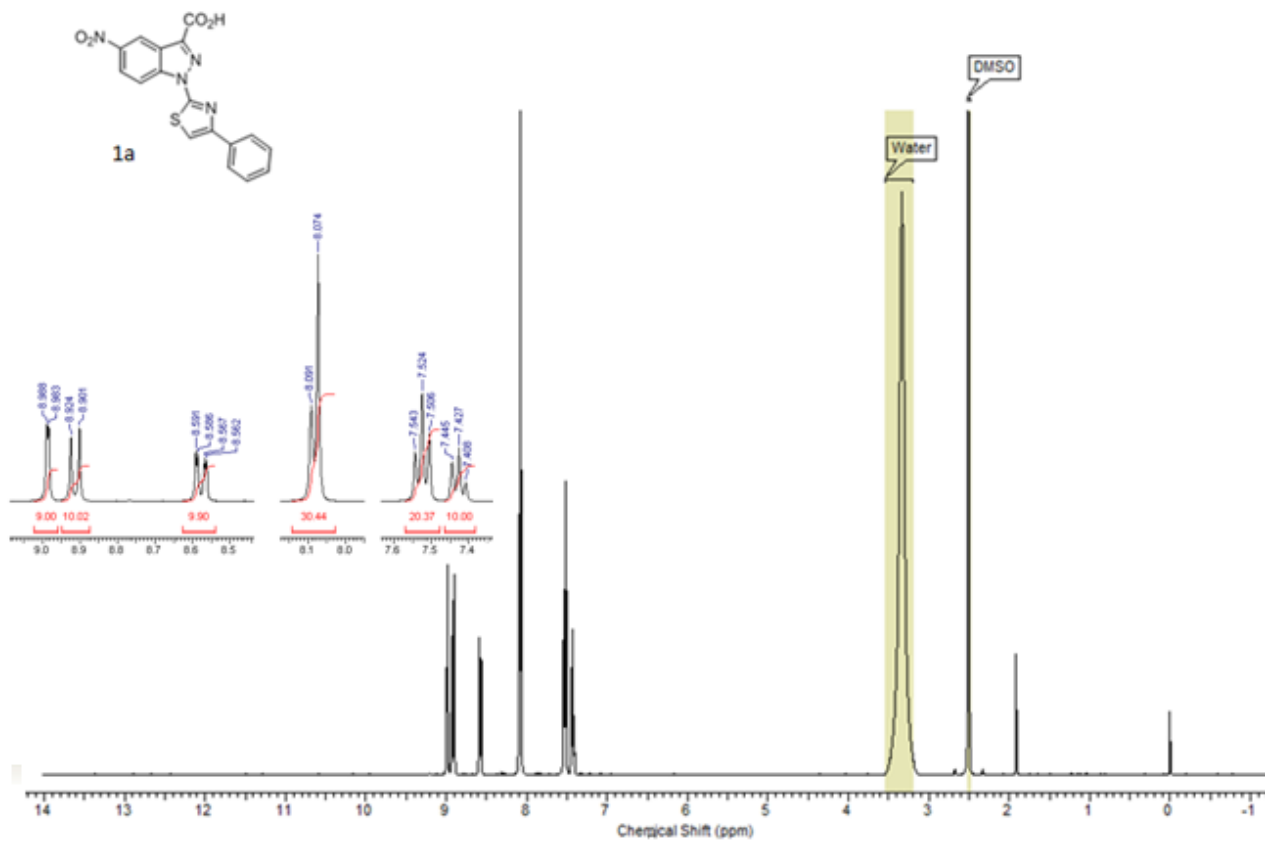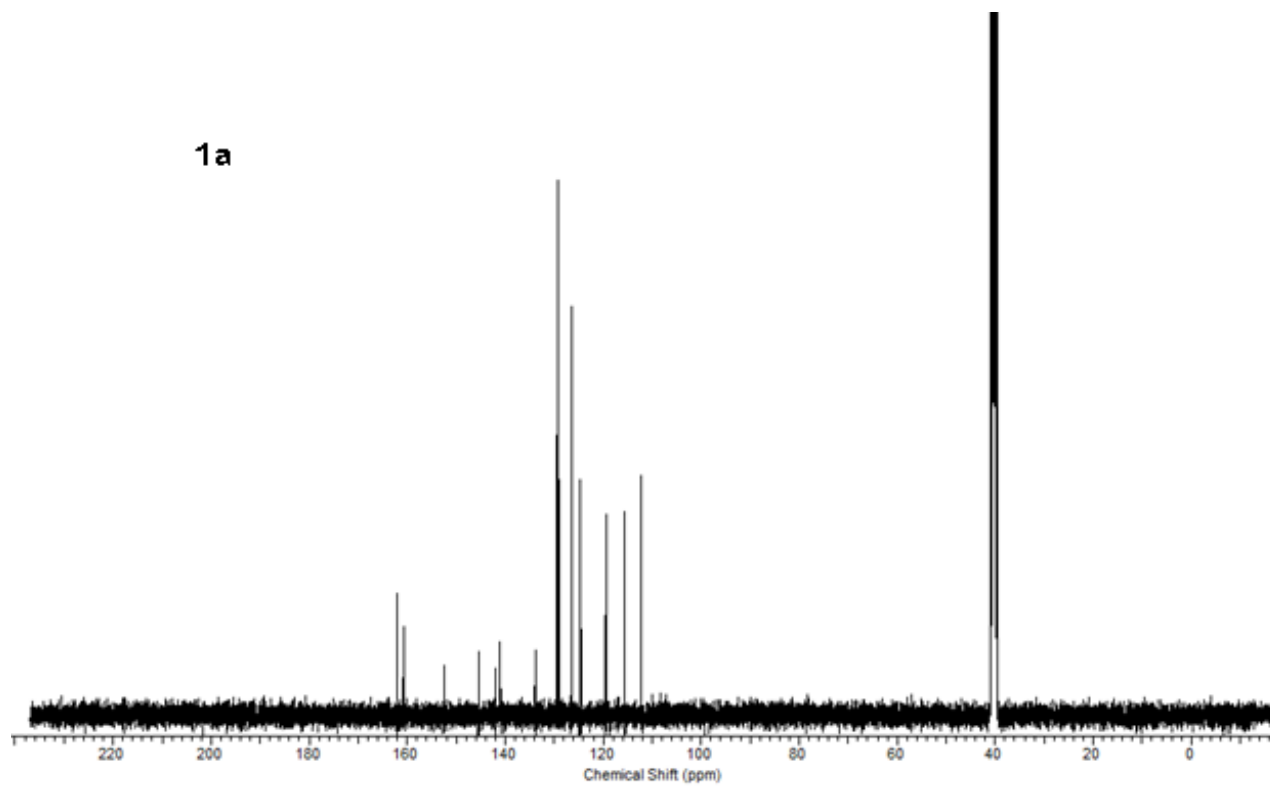

Sample Name: RYF-292 Sample Location: P1-A-07 Sample Id: RYF-292 Operator: Sunia Trauger  
 Data File Name: D:\PE Sciex Data\Projects\DA TOF Data\SATData\RYF-292-130911-00222.wiff Acq Time: September 13 2011, 03:12:36 PM  
 Method: D:\TOF\_Data\methods\HRES\_FIA\_2M\_0.2R\_ANM.ANM.mfc.xml

One or more scans have failed IRM. Review the data file for details.

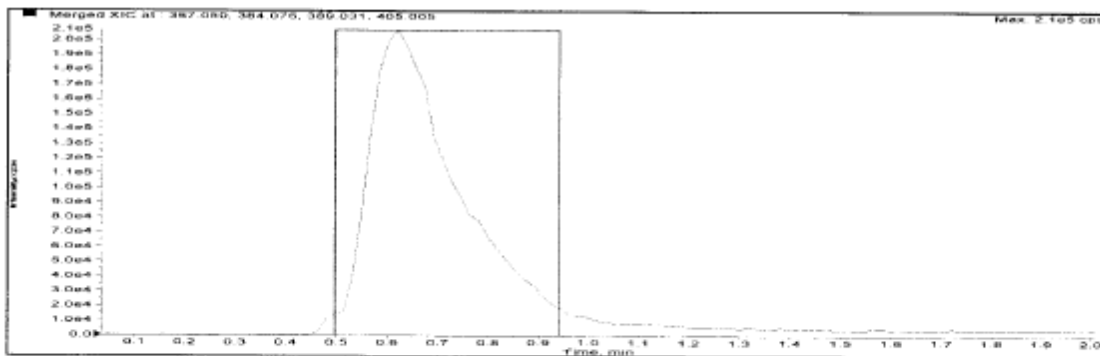

Merged XIC, Period# : 1 Experiment# : 1

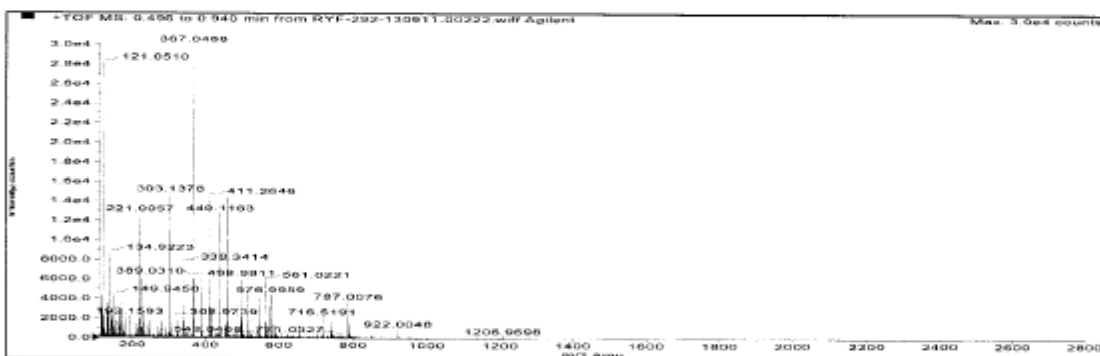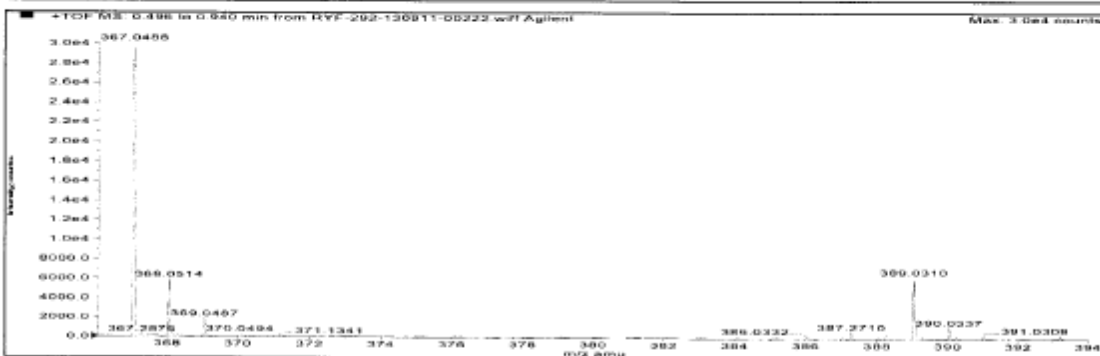

| Formula     | Compound name | Mass      | Peak RT (min) | Peak area  | Description |
|-------------|---------------|-----------|---------------|------------|-------------|
| C17H10N4O4S | --            | 386.04228 | 0.62          | 2.51285 E6 | --          |

| Species             | Abundance (counts) | Ion Mass  | Measured Mass | Error (mDa) | Error (ppm) | Ret. Time Error (min) |
|---------------------|--------------------|-----------|---------------|-------------|-------------|-----------------------|
| [M+H] <sup>+</sup>  | 31854.27           | 367.04955 | 367.04880     | -0.74739    | -2.04       | --                    |
| [M+Na] <sup>+</sup> | 6434.26            | 389.03150 | 389.03101     | -0.49059    | -1.26       | --                    |

1'b

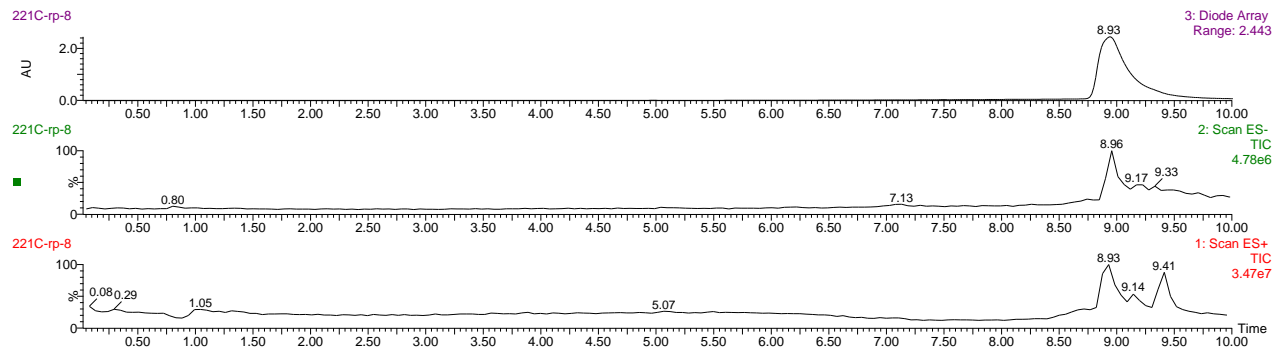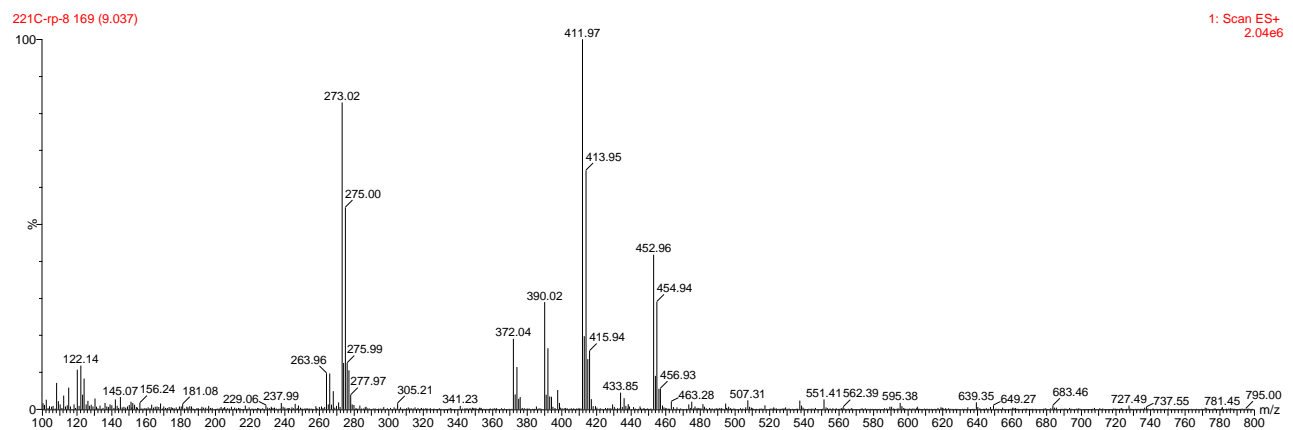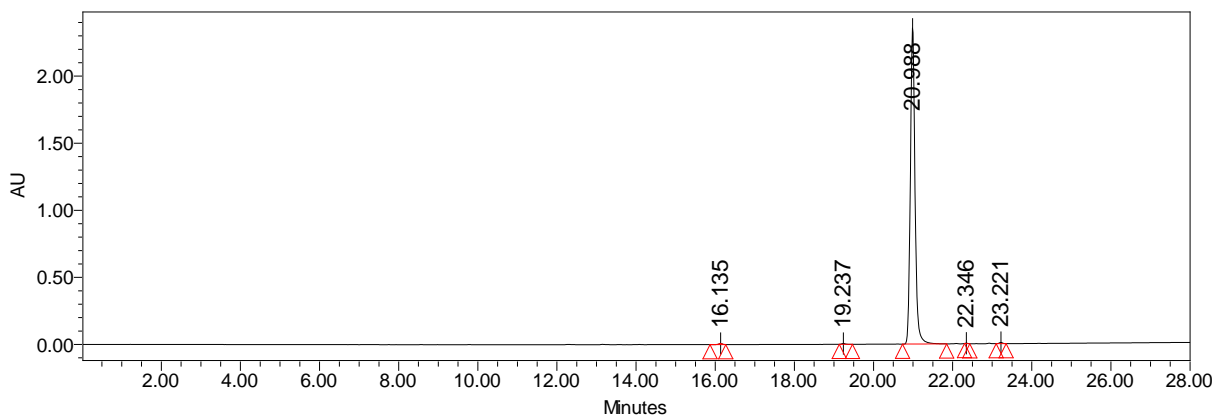

|   | Retention Time | % Area |
|---|----------------|--------|
| 1 | 16.135         | 0.26   |
| 2 | 19.237         | 0.20   |
| 3 | 20.988         | 99.22  |
| 4 | 22.346         | 0.06   |
| 5 | 23.221         | 0.27   |

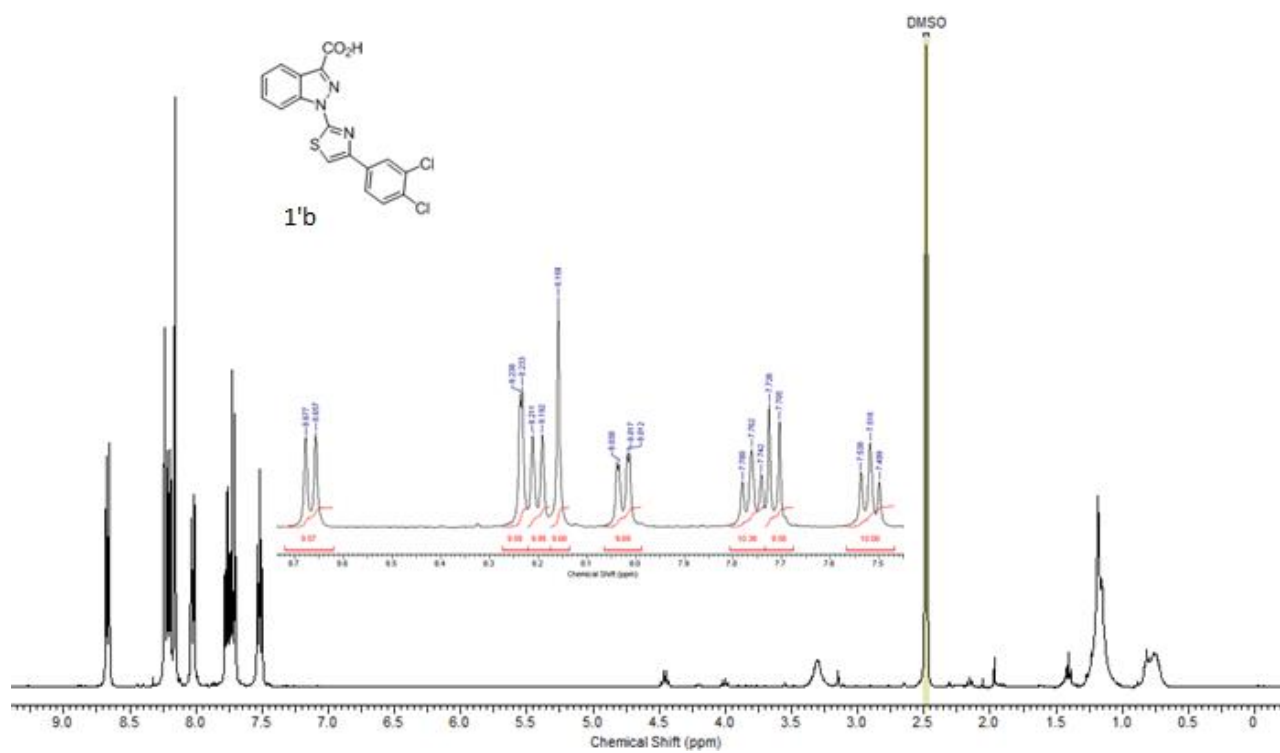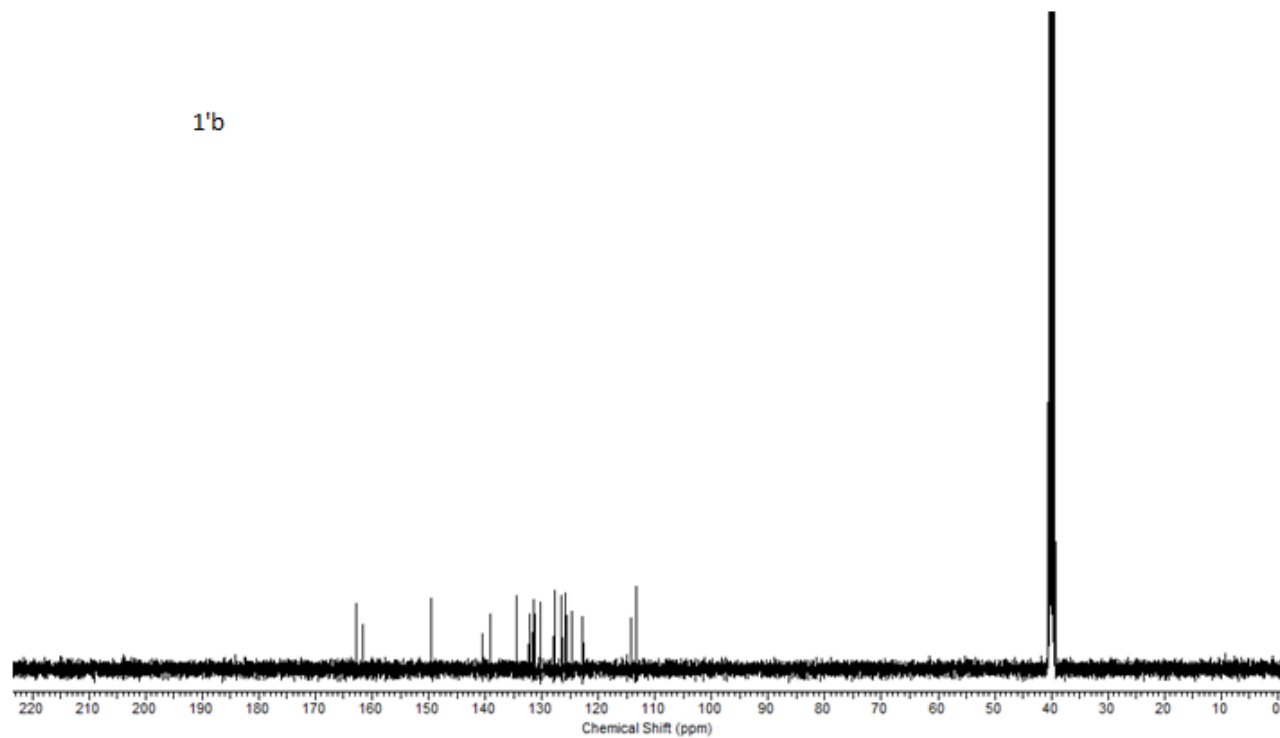

Sample Name: RYF-221ACID Sample Location: P1-E-06 Sample Id: RYF-221ACID Operator: Sunia Trauger  
 Data File Name: D:\PE Sciex Data\Projects\OA\_TOF Data\SAT\Data\RYF-221ACID-150911-00044.wiff Acq Time: September 15 2011, 10:08:07 AM  
 Method: D:\TOF\_Data\methods\HRES\_FIA\_2M\_0.2R\_ANM.ANM\efc.xml

One or more scans have failed IRM. Review the data file for details.

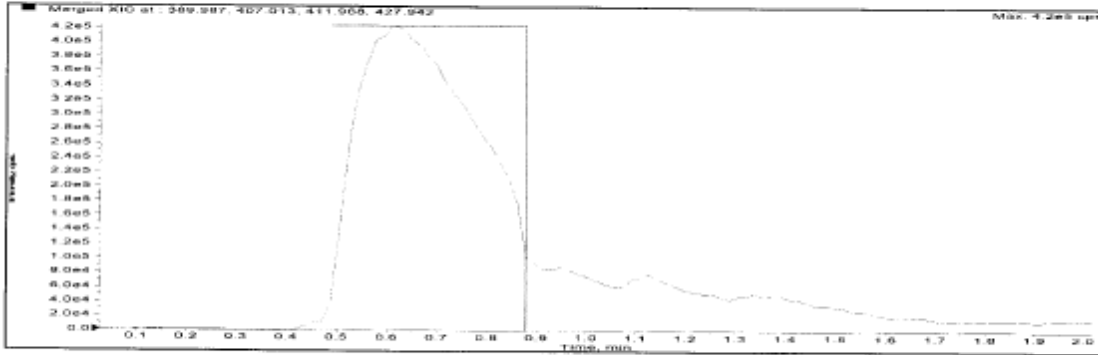

Merged XIC, Period#: 1 Experiment#: 1

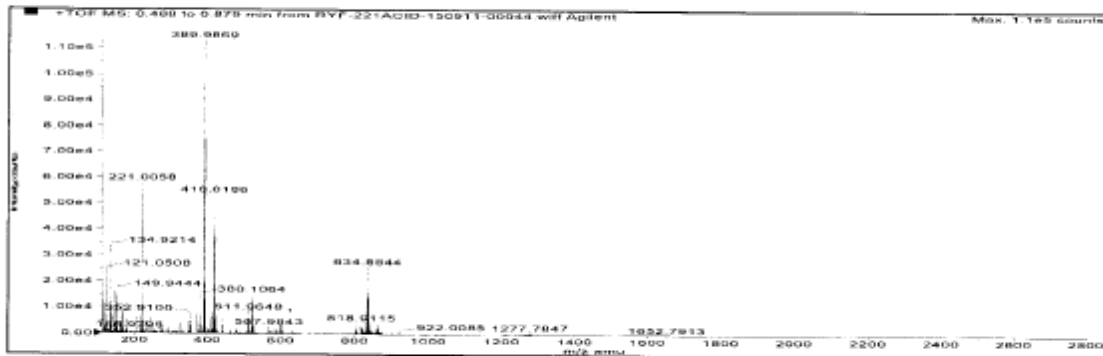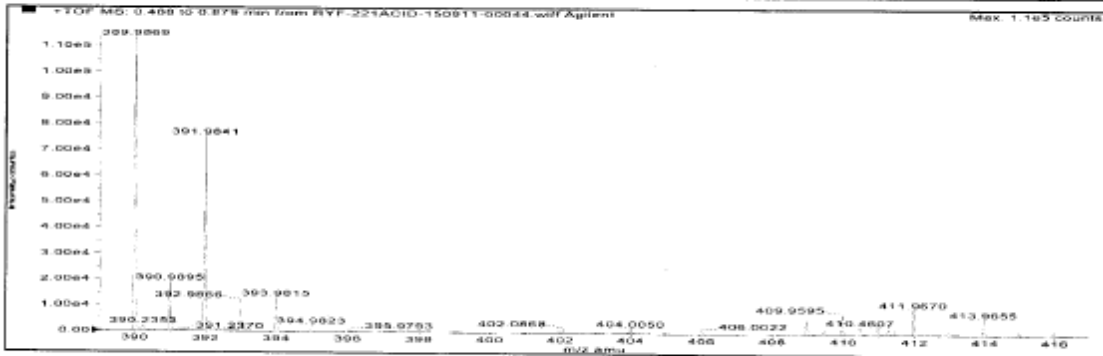

| Formula       | Compound name | Mass      | Peak RT (min) | Peak area  | Description |
|---------------|---------------|-----------|---------------|------------|-------------|
| C17H9Cl2N3O2S | --            | 389.97925 | 0.62          | 6.27081 EB | --          |

| Species             | Abundance (counts) | Ion Mass  | Measured Mass | Error (mDa) | Error (ppm) | Ret. Time Error (min) |
|---------------------|--------------------|-----------|---------------|-------------|-------------|-----------------------|
| [M+H] <sup>+</sup>  | 113370.93          | 389.98653 | 389.98689     | 0.36481     | 0.94        | --                    |
| [M+Na] <sup>+</sup> | 10557.47           | 411.98847 | 411.98699     | -1.48630    | -3.81       | --                    |

1b

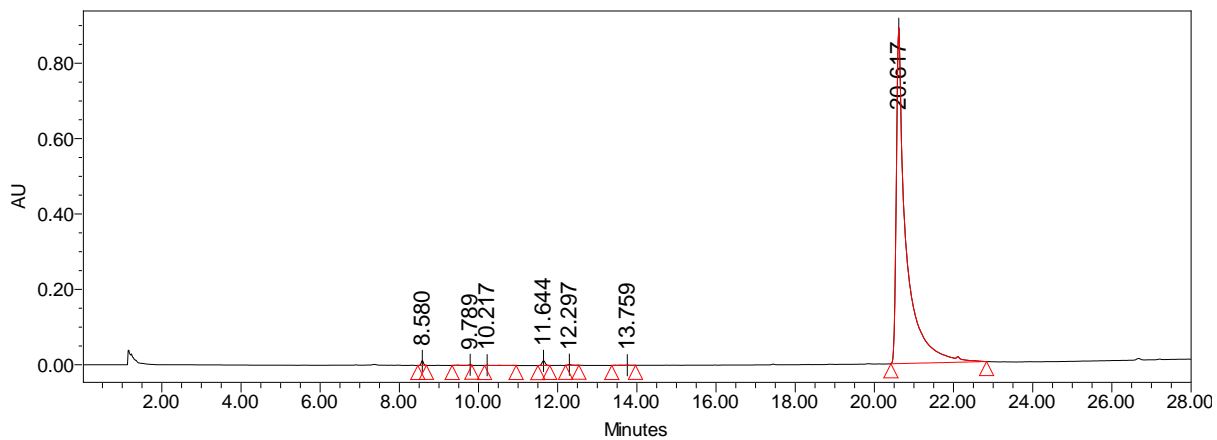

|   | Retention Time | % Area |
|---|----------------|--------|
| 1 | 8.580          | 0.32   |
| 2 | 9.789          | 0.10   |
| 3 | 10.217         | 0.05   |
| 4 | 11.644         | 0.46   |
| 5 | 12.297         | 0.08   |
| 6 | 13.759         | 0.07   |
| 7 | 20.617         | 98.93  |

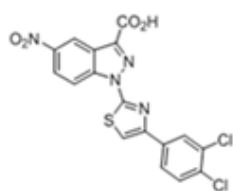

1b

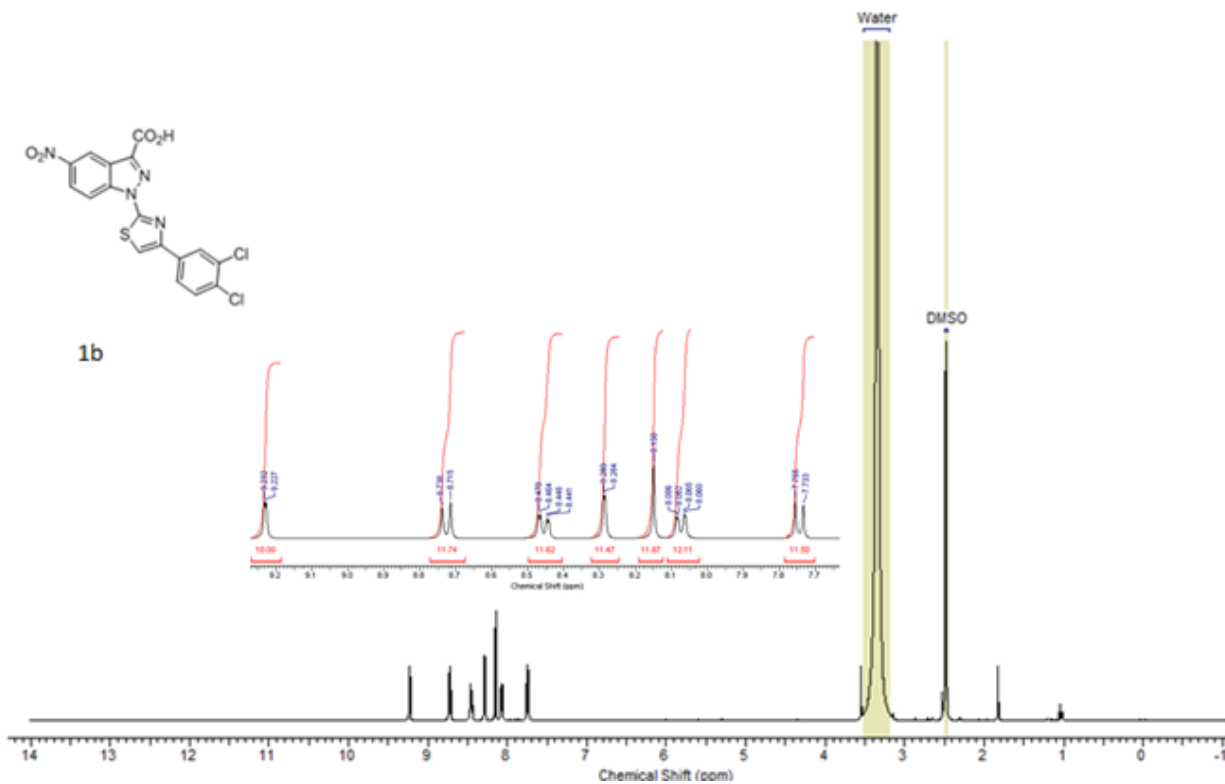



1b

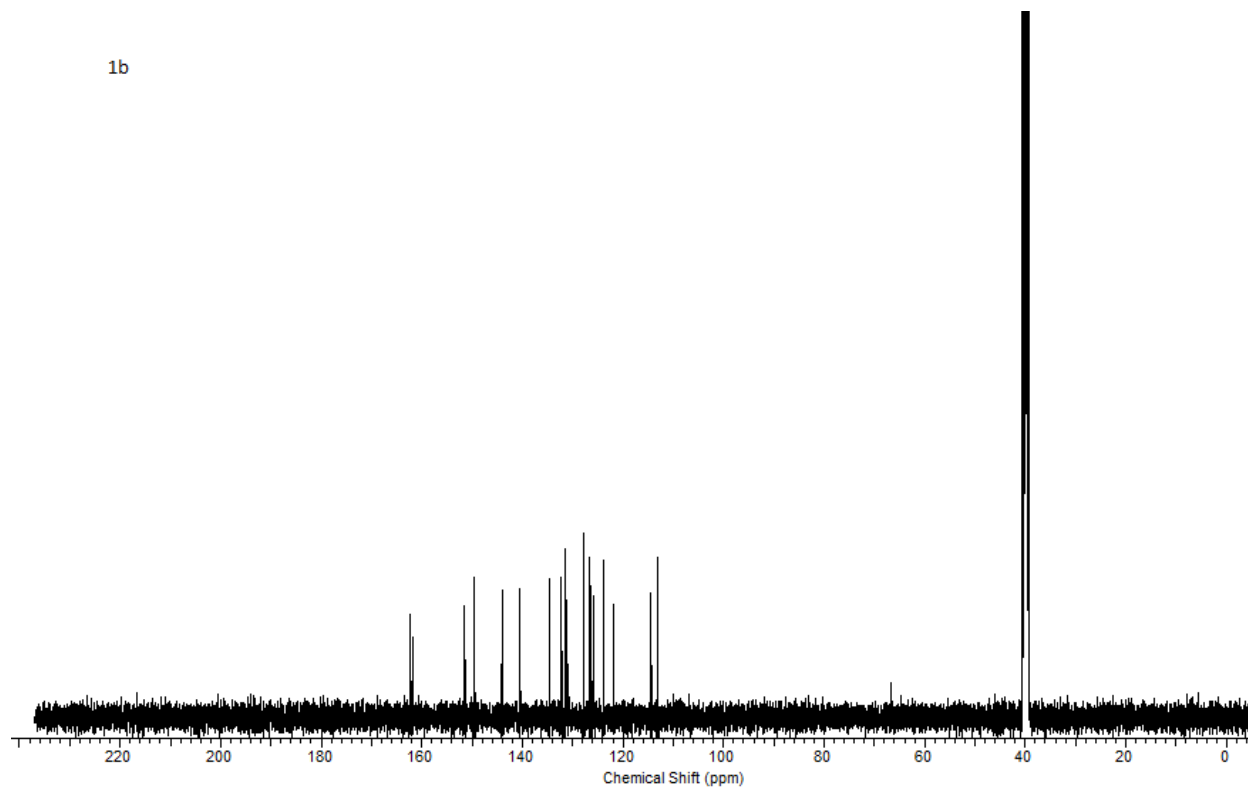

**Sample Name** RYF-440                      **Position** P1-A03                      **Instrument Name**  
**User Name** Revital Freedman              **Inj Vol** 0.2                      **IRM Calibration Status**  
**Data Filename** RYF-4401-060712-0028    **ACQ Method** OA\_FIA\_NEG.M              **Comment**  
**Acquired Time** 7/6/2012 1:46:39 PM

| Compound Label            | RT   | Mass     | Abund | Formula            | Tot Mass |
|---------------------------|------|----------|-------|--------------------|----------|
| Cpd 1: C17 H8 Cl2 N4 O4 S | 0.38 | 433.9632 | 6353  | C17 H8 Cl2 N4 O4 S | 433.9643 |

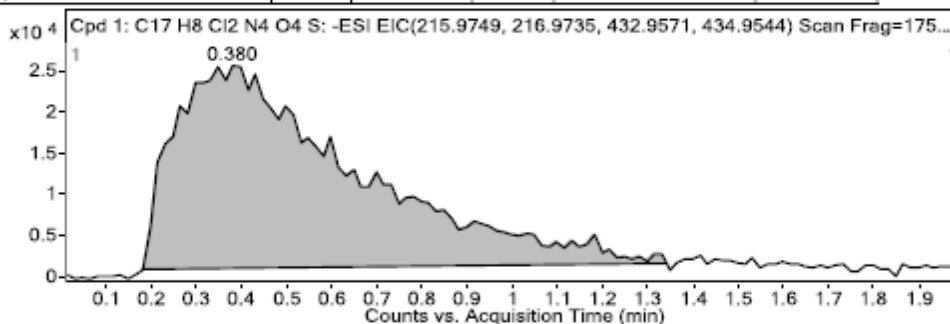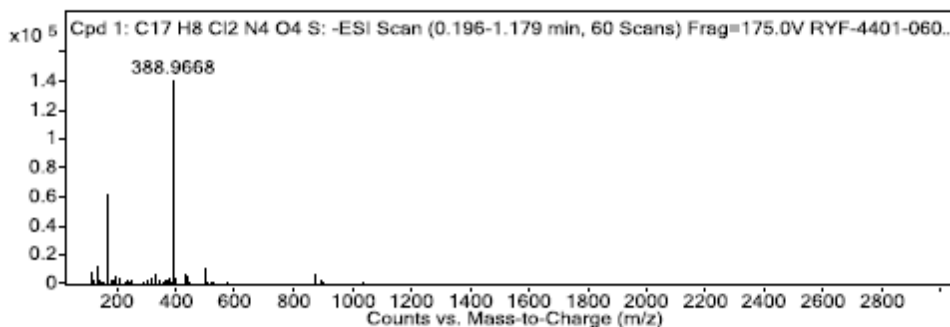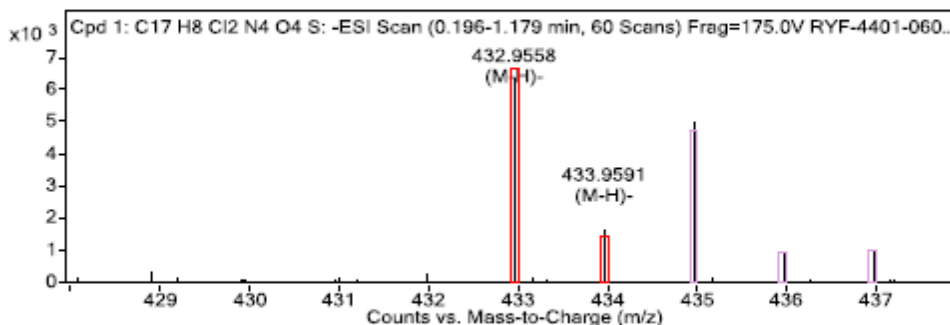

| m/z      | Calc m/z | Diff(ppm) | z | Abund     | Formula       | Ion    |
|----------|----------|-----------|---|-----------|---------------|--------|
| 388.9668 |          |           |   | 141006.44 |               |        |
| 432.9558 | 432.9571 | -2.82     | 1 | 6353.06   | C17H7Cl2N4O4S | (M-H)- |
| 433.9591 | 433.9598 | -1.64     | 1 | 1686.12   | C17H7Cl2N4O4S | (M-H)- |



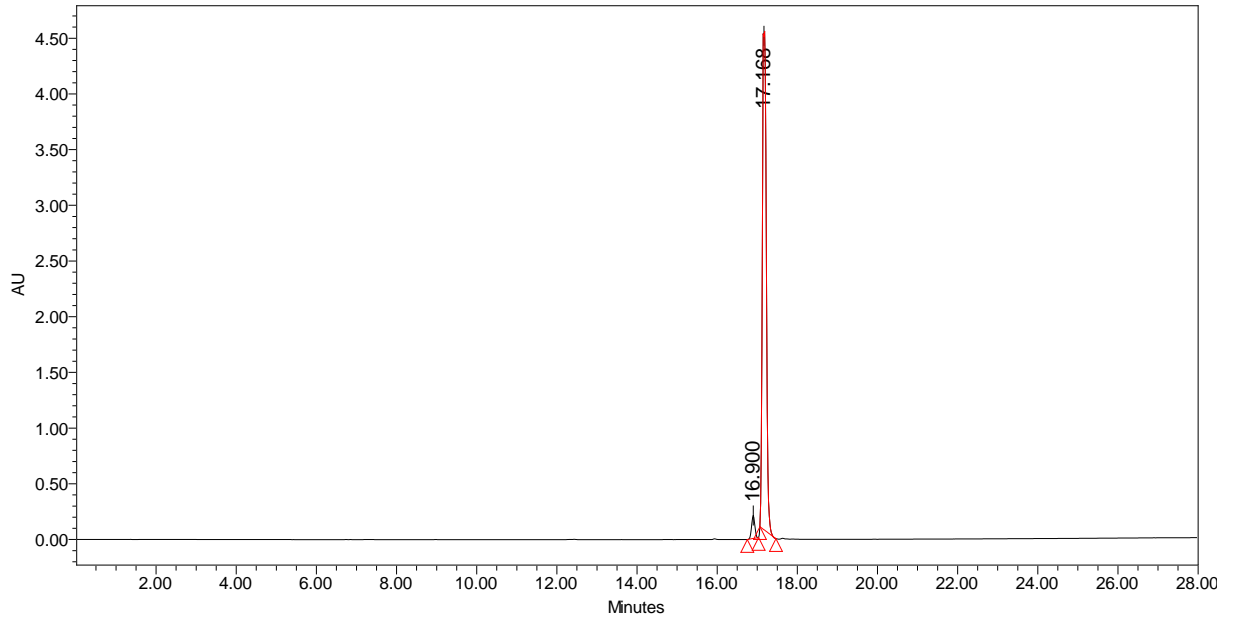

|   | Retention Time | % Area |
|---|----------------|--------|
| 1 | 16.900         | 3.59   |
| 2 | 17.168         | 96.41  |

Sample Name: RYF-222ACID Sample Location: P1-E-08 Sample Id: RYF-222ACID Operator: Sunia Trauger  
 Data File Name: D:\PE Sclex Data\Projects\QA TOF Data\SAT\Data\RYF-222ACID-150911-00046.wiff Acq Time: September 15 2011, 10:17:43 AM  
 Method: D:\TOF\_Data\damethods\HRES\_FIA\_2M\_0.2R\_ANM\ANM\efc.xml

One or more scans have failed IRM. Review the data file for details.

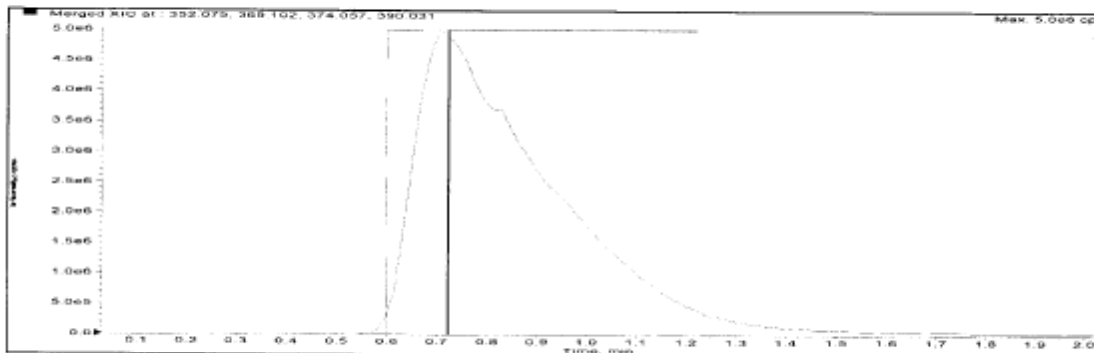

Merged XIC, Period#: 1 Experiment#: 1

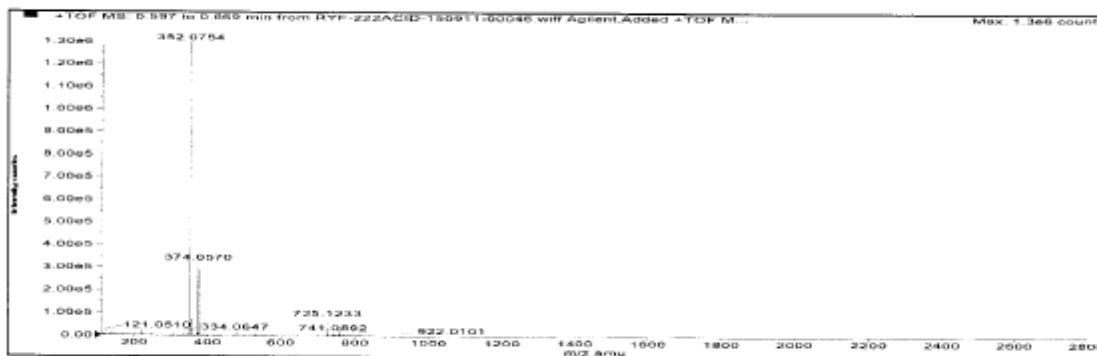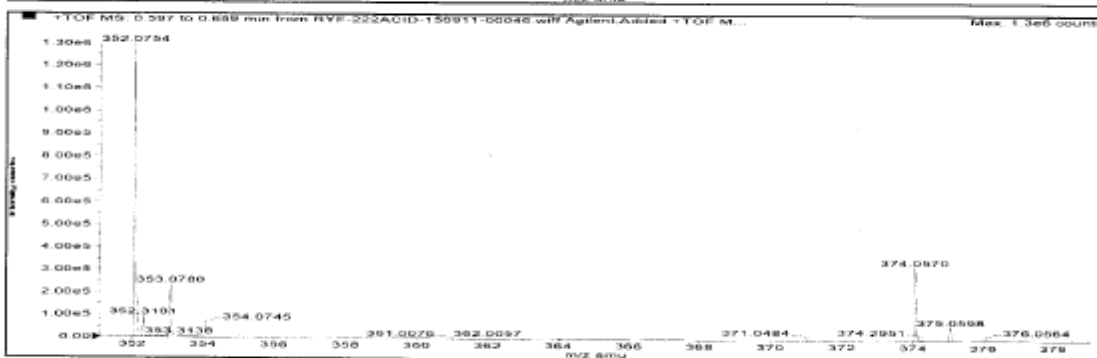

| Formula     | Compound name | Mass      | Peak RT (min) | Peak area  | Description |
|-------------|---------------|-----------|---------------|------------|-------------|
| C18H13N3O3S | --            | 351.06776 | 0.71          | 9.00298 E7 | --          |

| Species             | Abundance (counts) | Ion Mass  | Measured Mass | Error (mDa) | Error (ppm) | Ret. Time Error (min) |
|---------------------|--------------------|-----------|---------------|-------------|-------------|-----------------------|
| [M+H] <sup>+</sup>  | 1298634.15         | 352.07504 | 352.07541     | 0.37623     | 1.07        | --                    |
| [M+Na] <sup>+</sup> | 340202.99          | 374.05698 | 374.05702     | 0.03918     | 0.10        | --                    |

1c

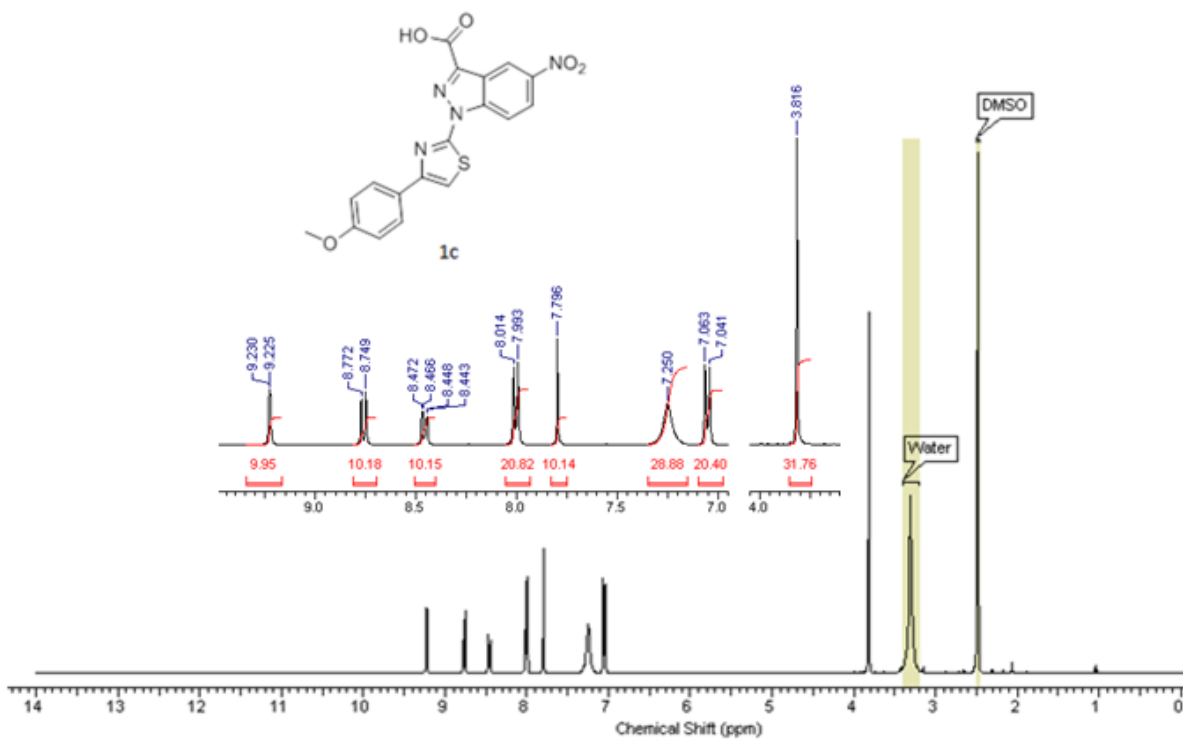

1c

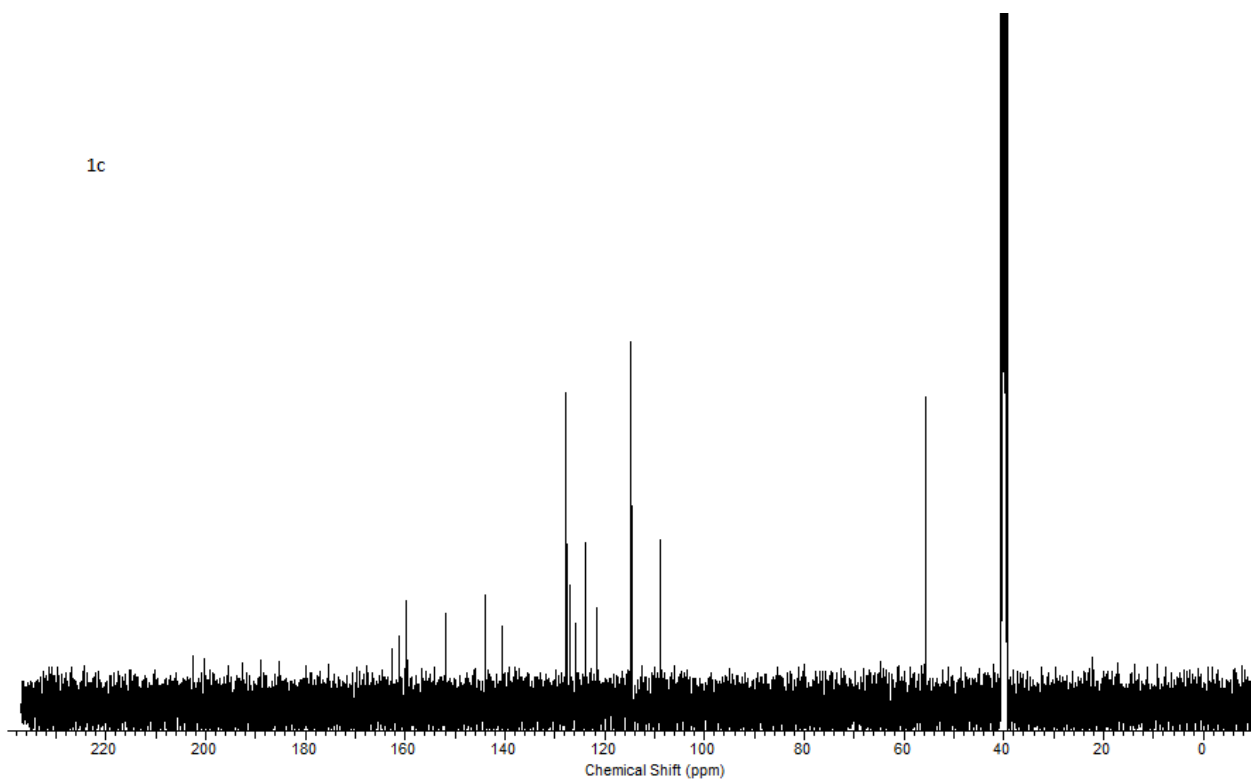

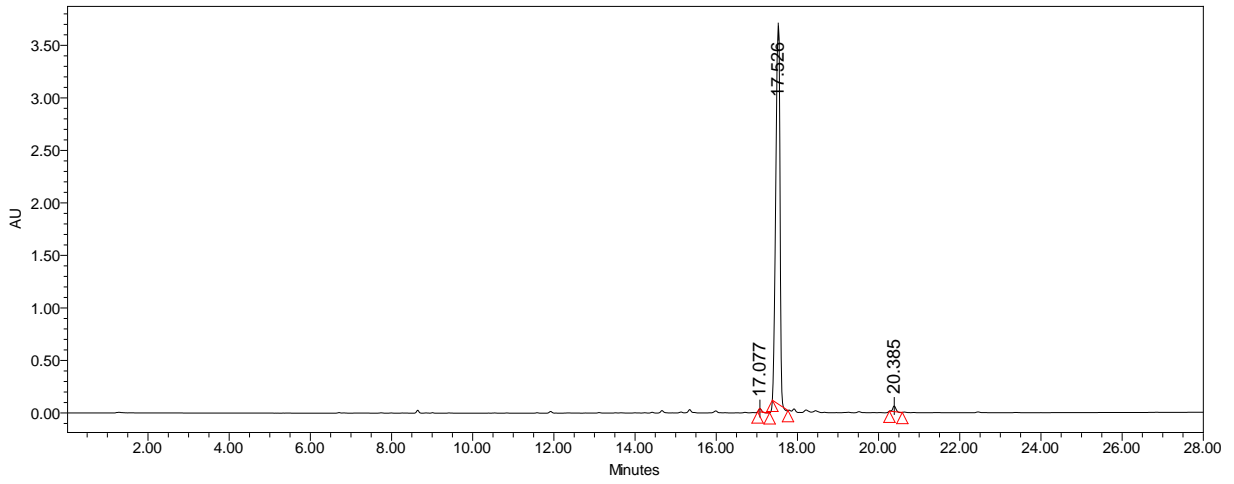

|   | Retention Time | % Area |
|---|----------------|--------|
| 1 | 17.077         | 0.64   |
| 2 | 17.526         | 98.23  |
| 3 | 20.385         | 1.13   |

Sample Name: RYF-761 Sample Location: P1-B-09 Sample Id: RYF-761 Operator: Sunia Trauger  
 Data File Name: D:\PE\_Sciex\_Data\Projects\IOA\_TOF\_Data\SAT\Data\RYF-761-130911-00233.wiff Acq Time: September 13 2011, 04:05:36 PM  
 Method: D:\TOF\_Data\damethods\HRES\_FIA\_2M\_0.2R\_ANM.ANM.mfc.xml

One or more scans have failed IRM. Review the data file for details.

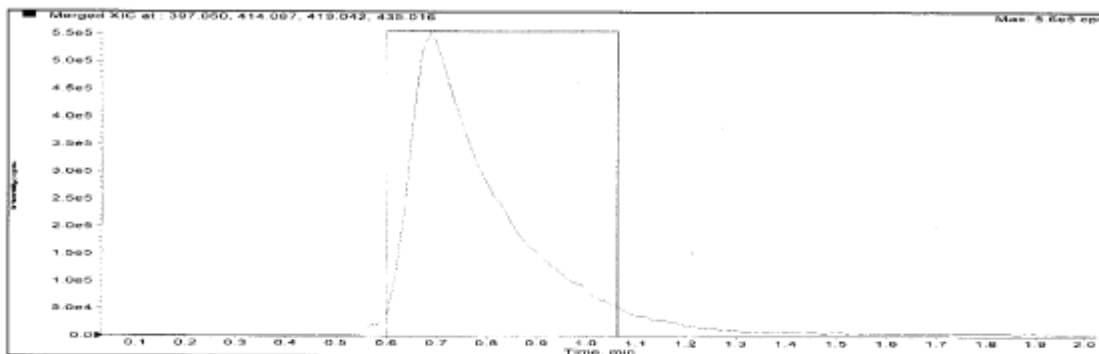

Merged XIC, Period#: 1 Experiment#: 1

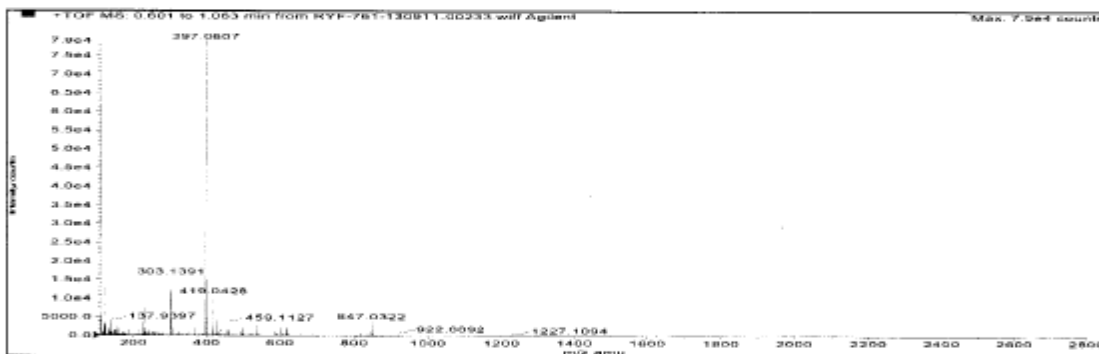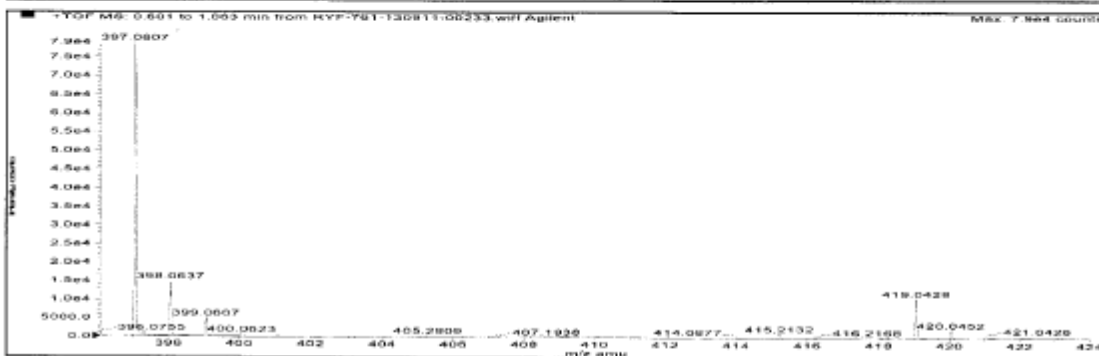

| Formula                                                         | Compound name | Mass      | Peak RT (min) | Peak area  | Description |
|-----------------------------------------------------------------|---------------|-----------|---------------|------------|-------------|
| C <sub>18</sub> H <sub>12</sub> N <sub>4</sub> O <sub>5</sub> S | --            | 396.05284 | 0.69          | 6.34707 E6 | --          |

| Species             | Abundance (counts) | Ion Mass  | Measured Mass | Error (mDa) | Error (ppm) | Ret. Time Error (min) |
|---------------------|--------------------|-----------|---------------|-------------|-------------|-----------------------|
| [M+H] <sup>+</sup>  | 82789.94           | 397.08012 | 397.08071     | 0.59698     | 1.50        | --                    |
| [M+Na] <sup>+</sup> | 11309.18           | 419.04206 | 419.04280     | 0.74363     | 1.77        | --                    |



1d

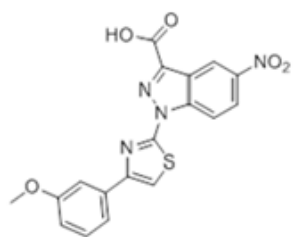

1d

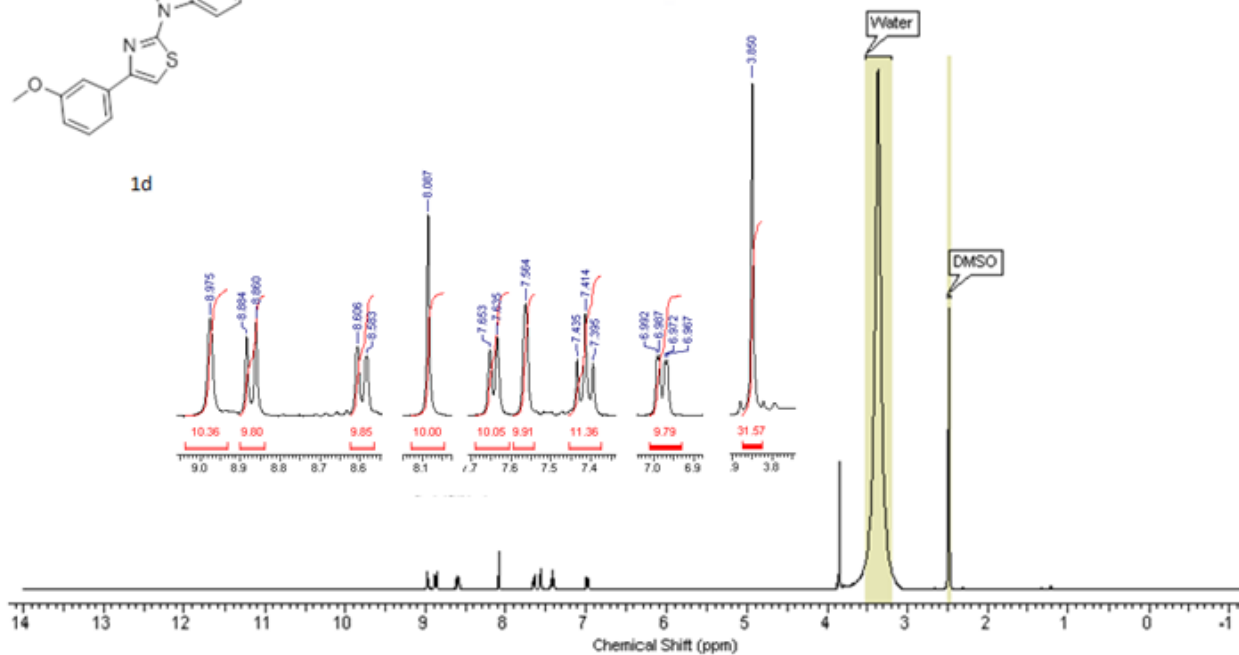

1d

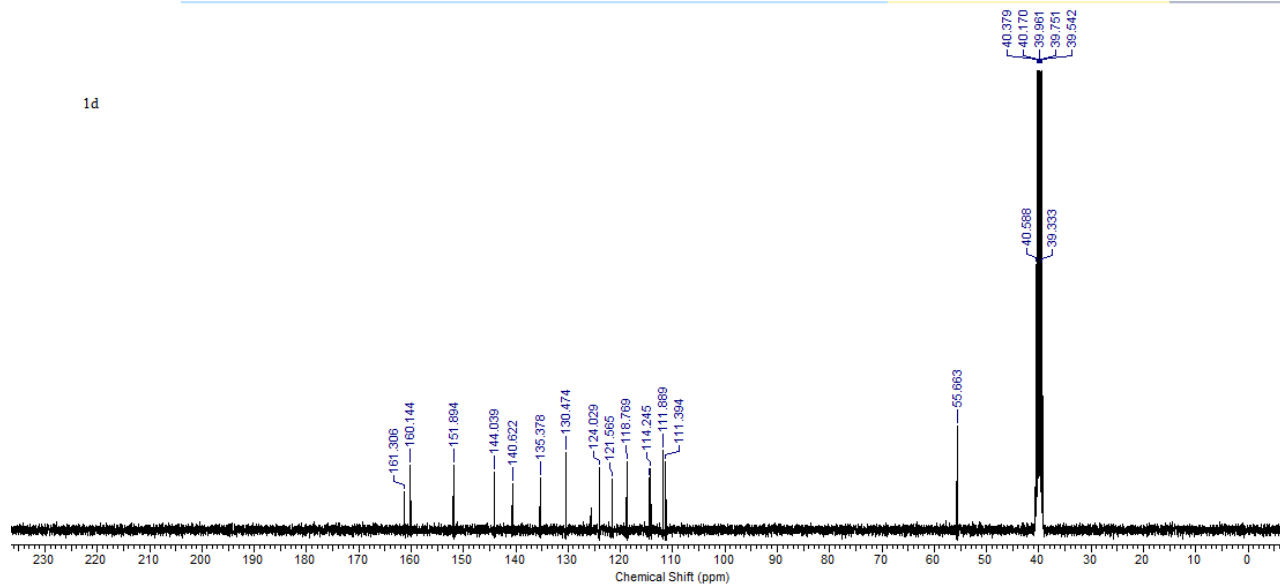

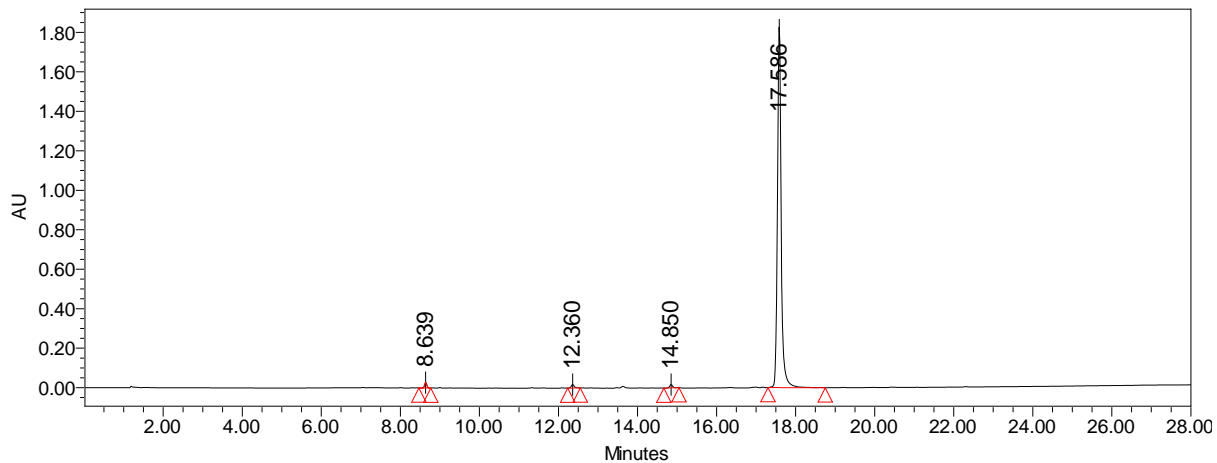

|   | Retention Time | % Area |
|---|----------------|--------|
| 1 | 8.639          | 0.91   |
| 2 | 12.360         | 0.76   |
| 3 | 14.850         | 0.69   |
| 4 | 17.586         | 97.64  |

**Sample Name** RYF-768                      **Position** P1-A03                      **Instrument Name**  
**User Name** Revital Freedman              **Inj Vol** 1                                      **IRM Calibration St**  
**Data Filename** RYF-7681-120712-0038      **ACQ Method** OA\_FIA\_POS.M              **Comment**  
**Acquired Time** 7/12/2012 3:17:46 PM

| Compound Label         | RT    | Mass     | Abund  | Formula         | Tot Mass |
|------------------------|-------|----------|--------|-----------------|----------|
| Cpd 1: C18 H12 N4 O5 S | 0.275 | 396.0538 | 204147 | C18 H12 N4 O5 S | 396.0528 |

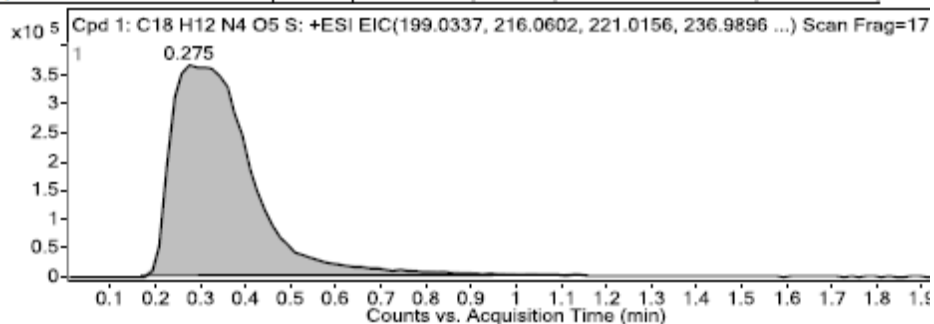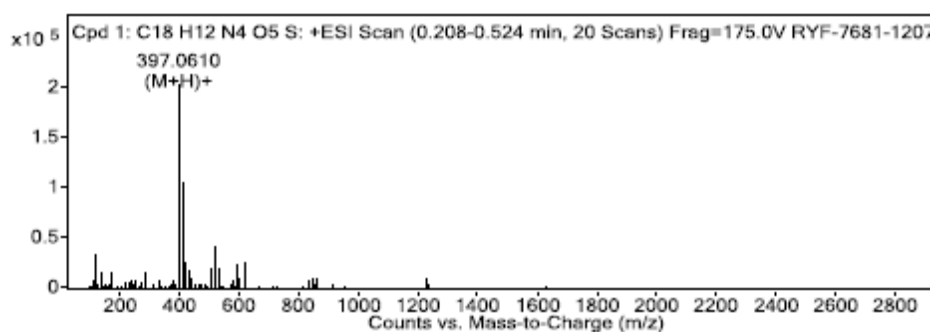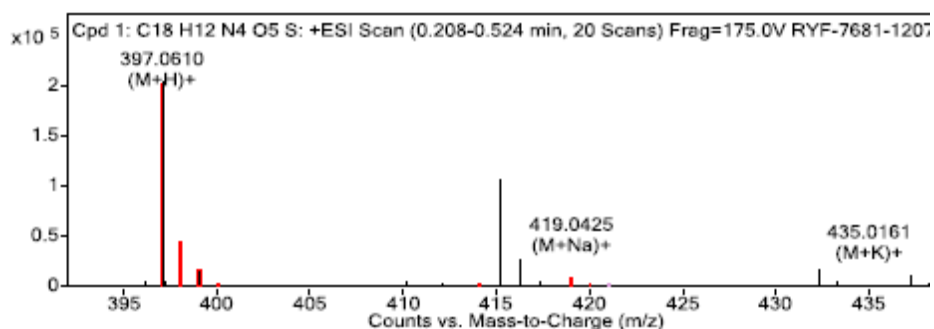

| m/z      | Calc m/z | Diff(ppm) | z | Abund     | Formula       | Ion      |
|----------|----------|-----------|---|-----------|---------------|----------|
| 397.061  | 397.0601 | 2.26      | 1 | 204146.78 | C18H13N4O5S   | (M+H)+   |
| 398.0636 | 398.0629 | 1.75      | 1 | 42701.98  | C18H13N4O5S   | (M+H)+   |
| 399.0617 | 399.0599 | 4.44      | 1 | 15002.97  | C18H13N4O5S   | (M+H)+   |
| 400.0658 | 400.0614 | 11.04     | 1 | 2986.19   | C18H13N4O5S   | (M+H)+   |
| 401.0686 | 401.0626 | 15.07     | 1 | 318.03    | C18H13N4O5S   | (M+H)+   |
| 414.0863 | 414.0867 | -0.87     | 1 | 727.95    | C18H16N5O5S   | (M+NH4)+ |
| 415.0755 | 415.0894 | -33.49    | 1 | 159.72    | C18H16N5O5S   | (M+NH4)+ |
| 419.0425 | 419.0421 | 1.14      | 1 | 7972.93   | C18H12N4NaO5S | (M+Na)+  |
| 420.0458 | 420.0449 | 2.11      | 1 | 1978.23   | C18H12N4NaO5S | (M+Na)+  |
| 435.0161 | 435.016  | 0.29      | 1 | 468.17    | C18H12KN4O5S  | (M+K)+   |

1e

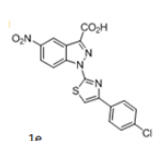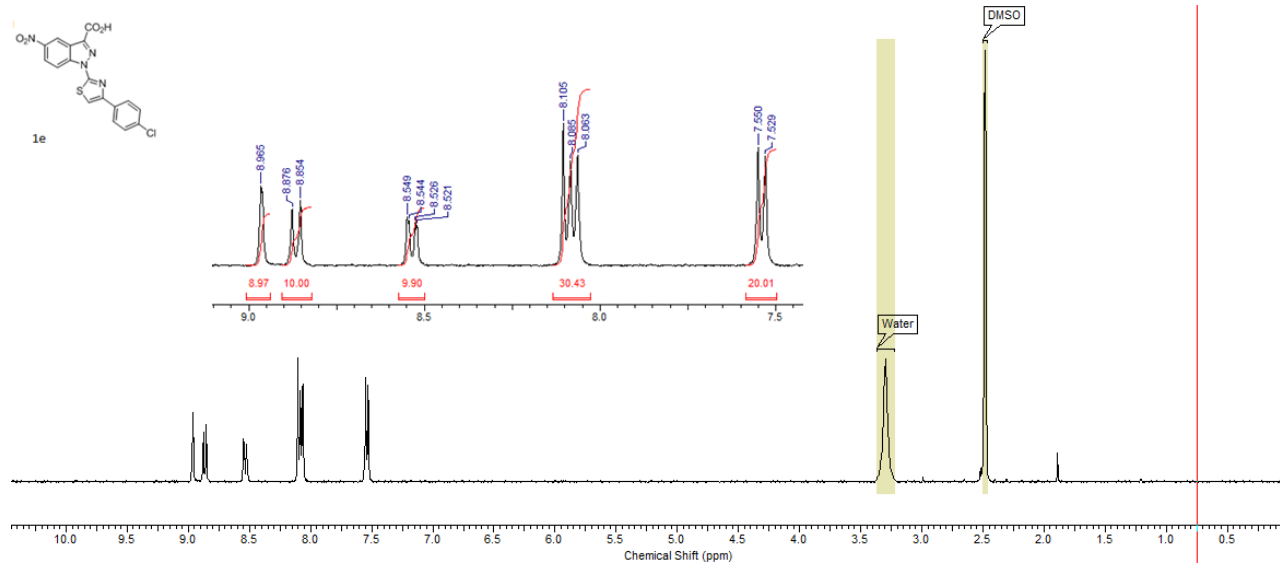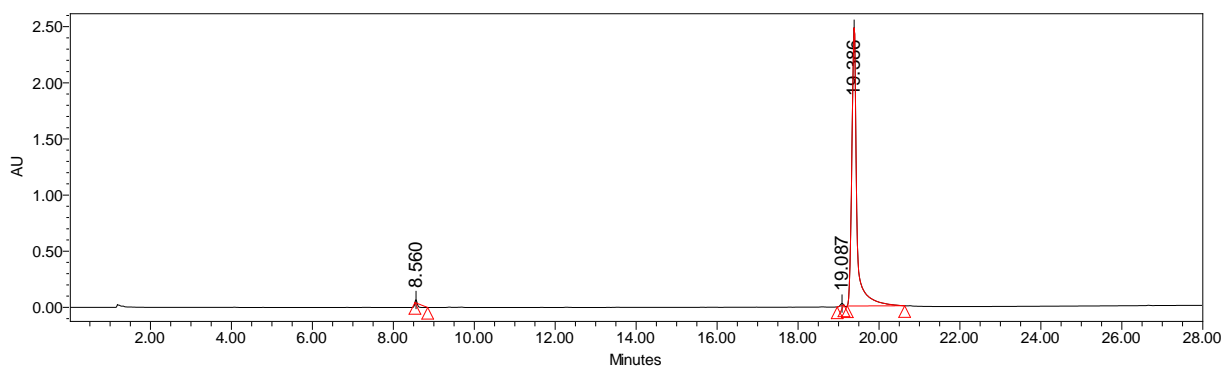

|   | Retention Time | % Area |
|---|----------------|--------|
| 1 | 8.560          | 1.37   |
|   | 19.386         | 98.63  |

**Sample Name** RYF-692-red      **Position** P2-F01      **Instrument Name**  
**User Name** Revital Freedman      **Inj Vol** 0.2      **IRM Calibration Status**  
**Data Filename** RYF-692-RED1-060712-      **ACQ Method** OA\_FIA\_NEG.M      **Comment**  
**Acquired Time** 7/6/2012 12:53:49 PM

| Compound Label           | RT    | Mass     | Abund | Formula           | Tot Mass |
|--------------------------|-------|----------|-------|-------------------|----------|
| Cpd 1: C17 H9 Cl N4 O4 S | 0.379 | 400.0041 | 5627  | C17 H9 Cl N4 O4 S | 400.0033 |

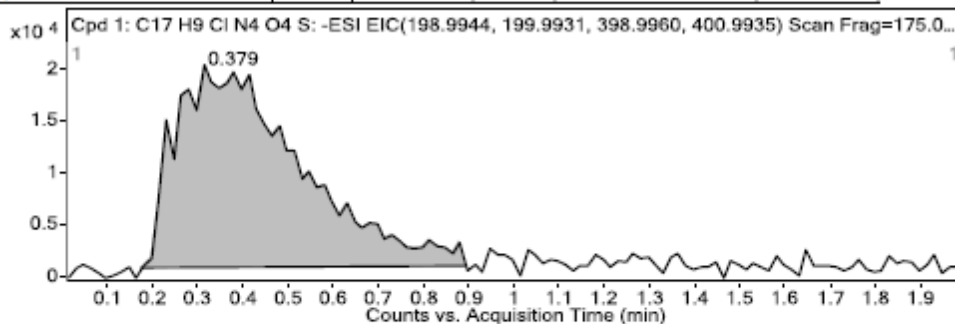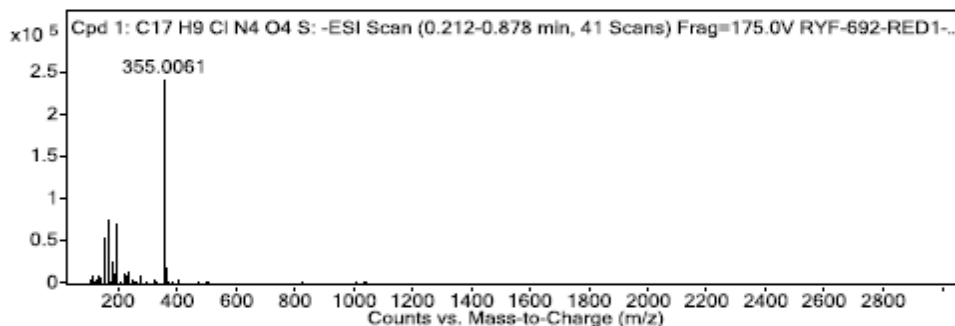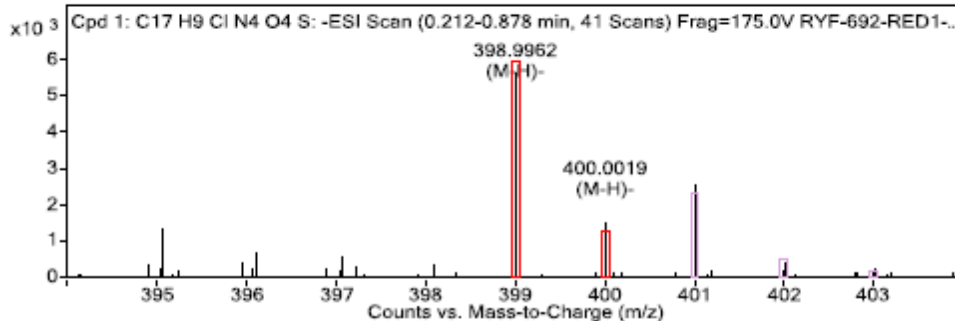

| m/z      | Calc m/z | Diff(ppm) | z | Abund     | Formula      | Ion    |
|----------|----------|-----------|---|-----------|--------------|--------|
| 355.0061 |          |           |   | 241626.84 |              |        |
| 398.9962 | 398.996  | 0.49      | 1 | 5626.71   | C17H8ClN4O4S | (M-H)- |
| 400.0019 | 399.9988 | 7.7       | 1 | 1529.63   | C17H8ClN4O4S | (M-H)- |

1f

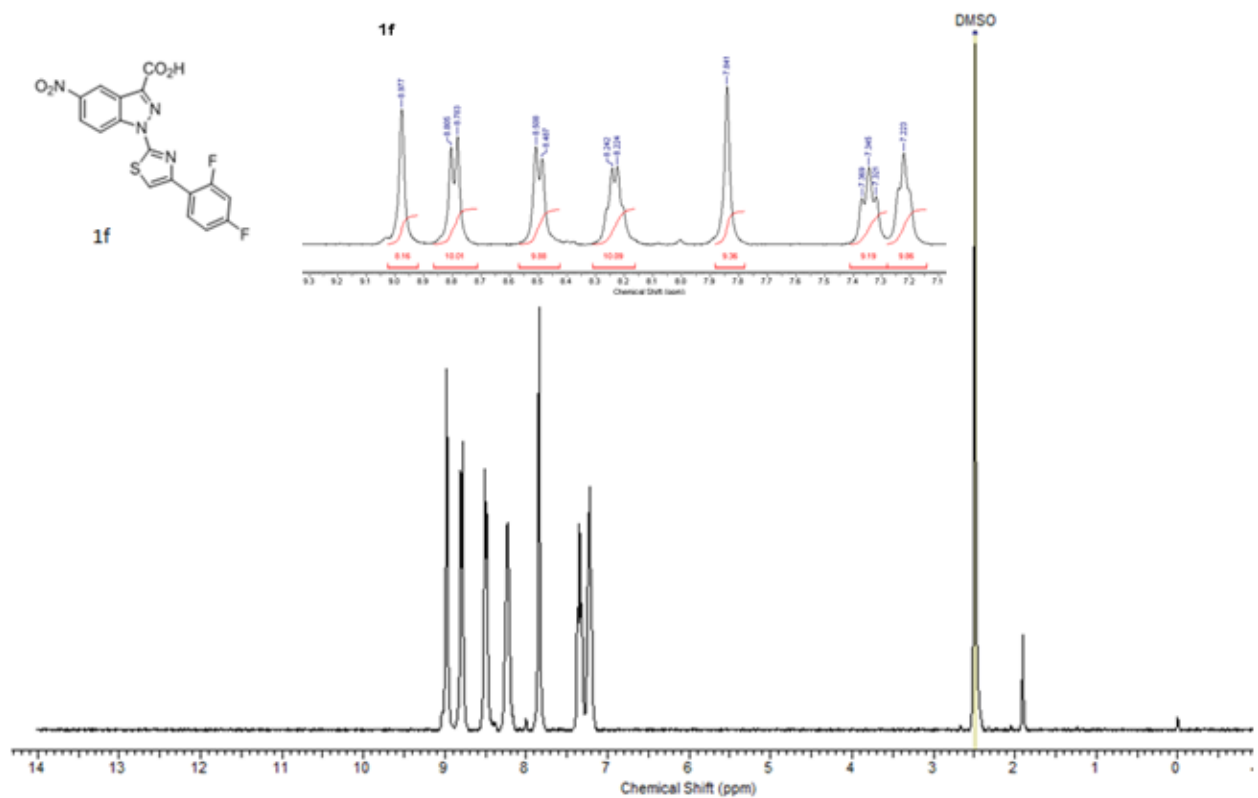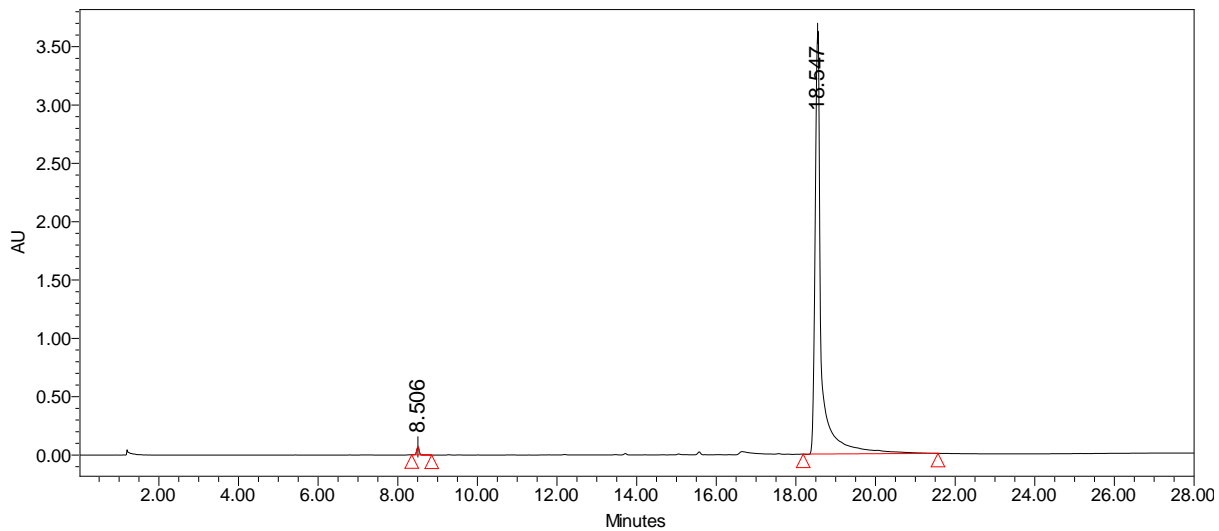

|   | Retention Time | % Area |
|---|----------------|--------|
| 1 | 8.506          | 0.73   |
| 2 | 18.547         | 99.27  |

|               |                      |            |              |                        |
|---------------|----------------------|------------|--------------|------------------------|
| Sample Name   | RYP-696              | Position   | P2-E05       | Instrument Name        |
| User Name     | Revital Freedman     | Inj Vol    | 0.2          | IRM Calibration Status |
| Data Filename | RYP-6961-060712-0027 | ACQ Method | OA_FIA_NEG.M | Comment                |
| Acquired Time | 7/6/2012 12:32:27 PM |            |              |                        |

| Compound Label           | RT    | Mass     | Abund | Formula           | Tot Mass |
|--------------------------|-------|----------|-------|-------------------|----------|
| Cpd 1: C17 H8 F2 N4 O4 S | 0.311 | 402.0224 | 7864  | C17 H8 F2 N4 O4 S | 402.0234 |

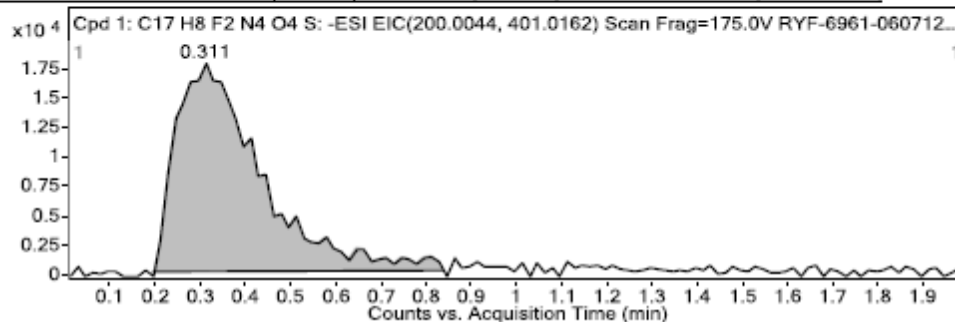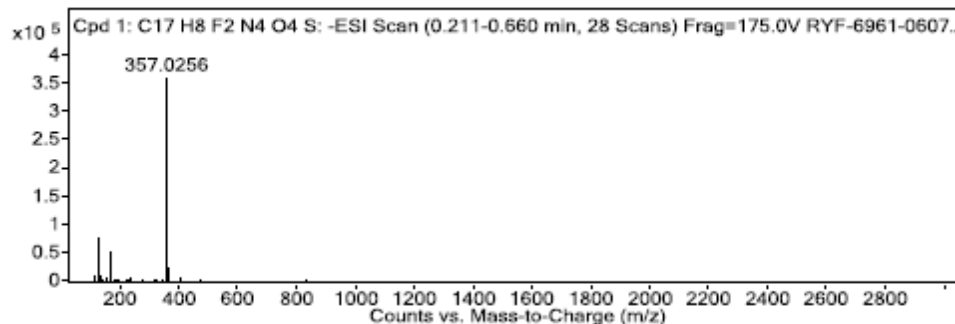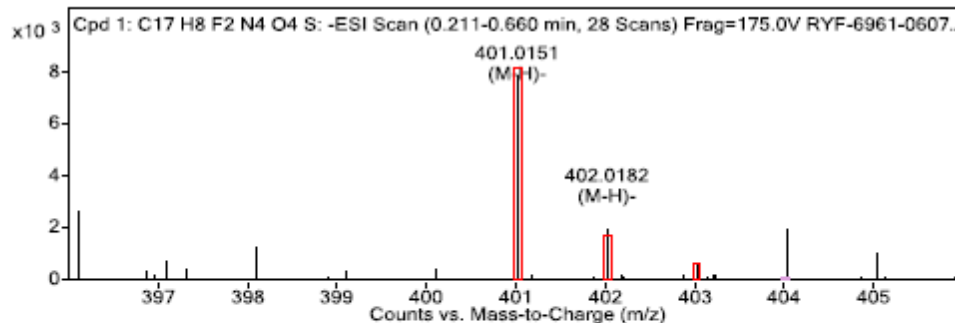

| m/z      | Calc m/z | Diff(ppm) | z | Abund     | Formula      | Ion    |
|----------|----------|-----------|---|-----------|--------------|--------|
| 357.0256 |          |           |   | 361141.34 |              |        |
| 401.0151 | 401.0162 | -2.55     | 1 | 7864.1    | C17H7F2N4O4S | (M-H)- |
| 402.0182 | 402.0189 | -1.89     | 1 | 1953.29   | C17H7F2N4O4S | (M-H)- |
| 403.014  | 403.0156 | -4.08     | 1 | 604.99    | C17H7F2N4O4S | (M-H)- |

1g

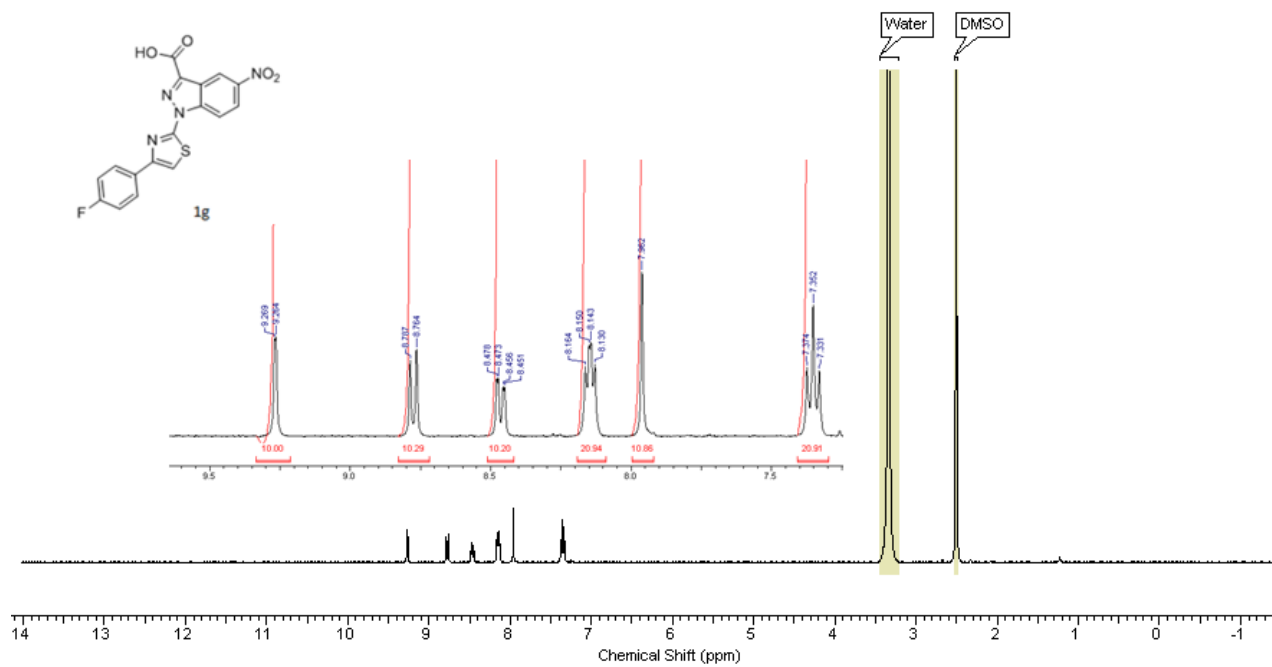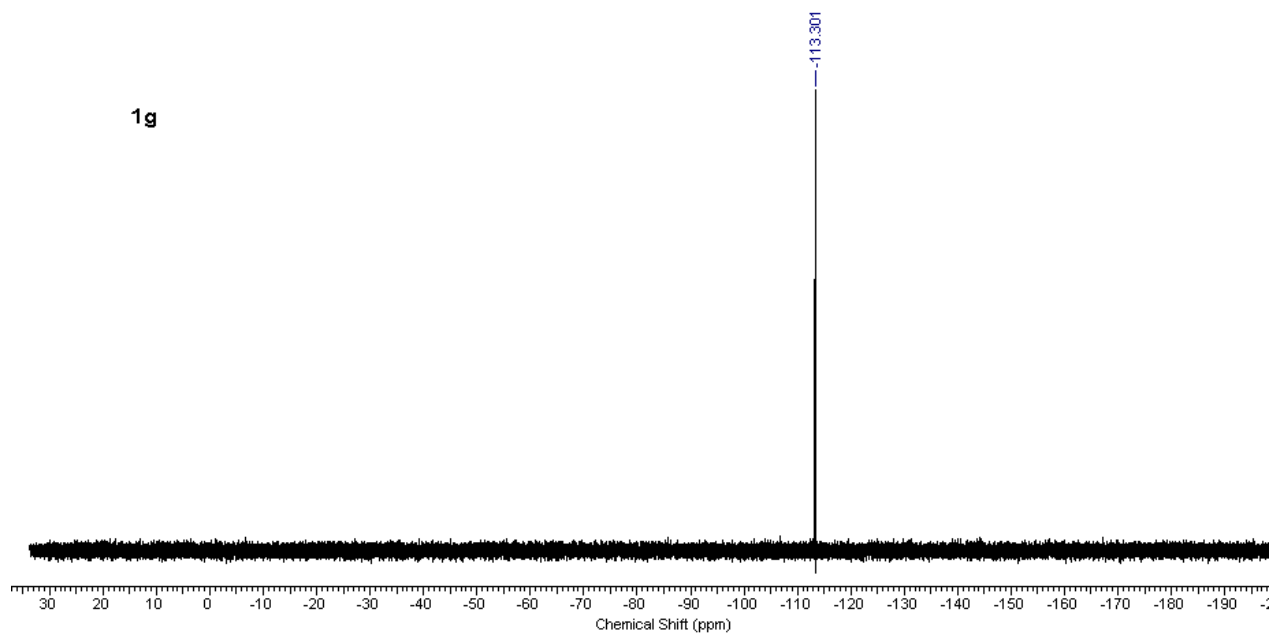



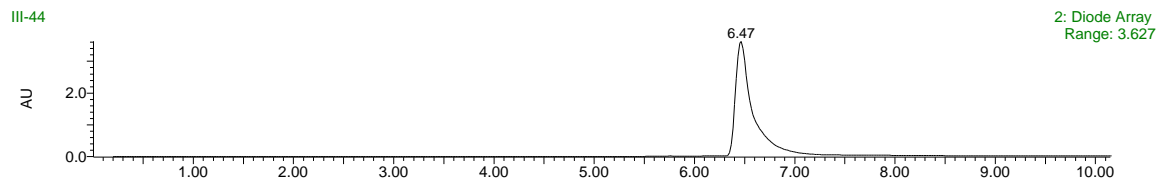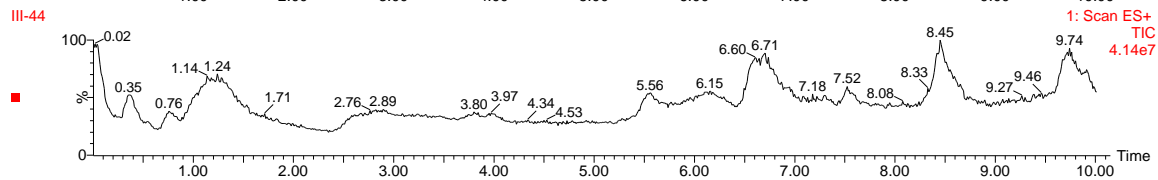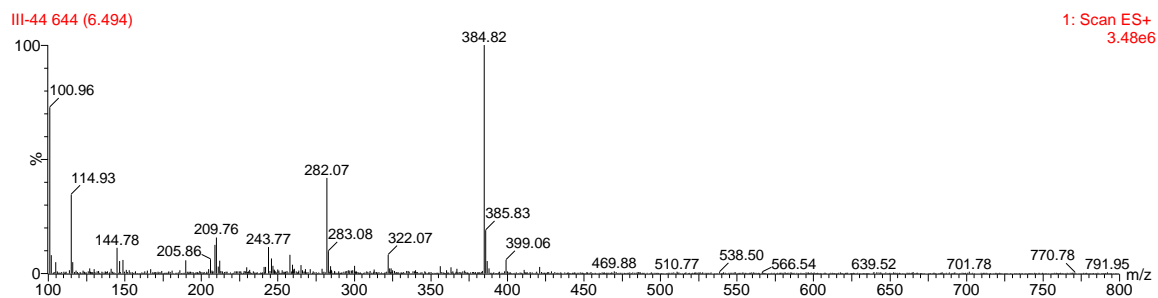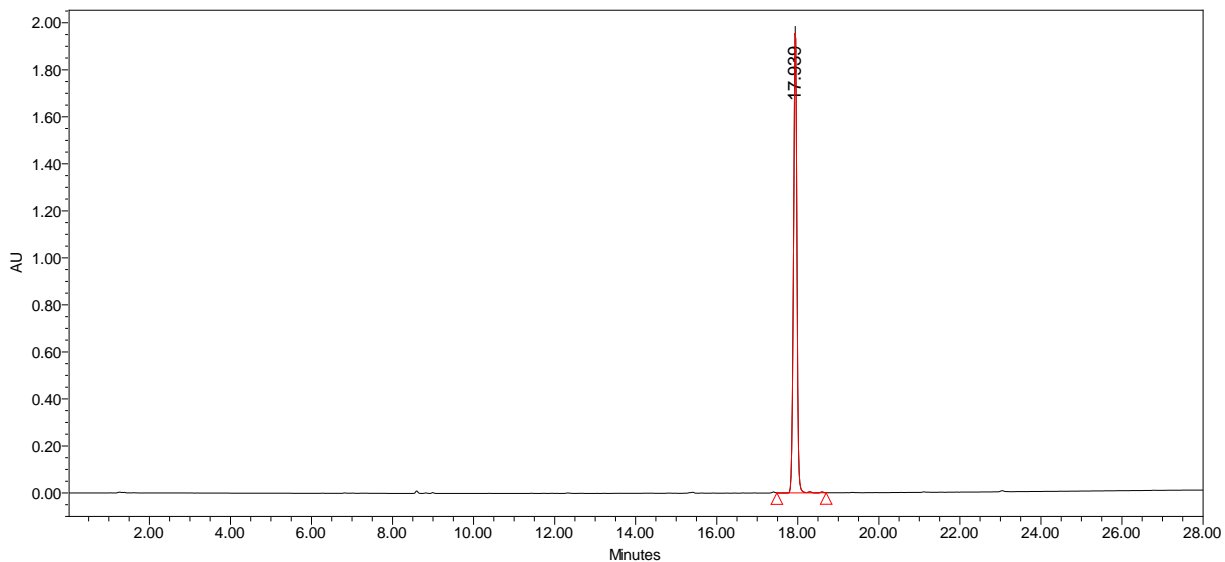

|   | Retention Time | % Area |
|---|----------------|--------|
| 1 | 17.939         | 100.00 |

**Sample Name** RYF-724                      **Position** P1-A05                      **Instrument Name**  
**User Name** Revital Freedman              **Inj Vol** 0.2                      **IRM Calibration Status**  
**Data Filename** RYF-7241-120712-0038      **ACQ Method** OA\_FIA\_NEG.M              **Comment**  
**Acquired Time** 7/12/2012 3:27:34 PM

| Compound Label          | RT    | Mass     | Abund | Formula          | Tot Mass |
|-------------------------|-------|----------|-------|------------------|----------|
| Cpd 1: C17 H9 F N4 O4 S | 0.302 | 384.0324 | 47470 | C17 H9 F N4 O4 S | 384.0329 |

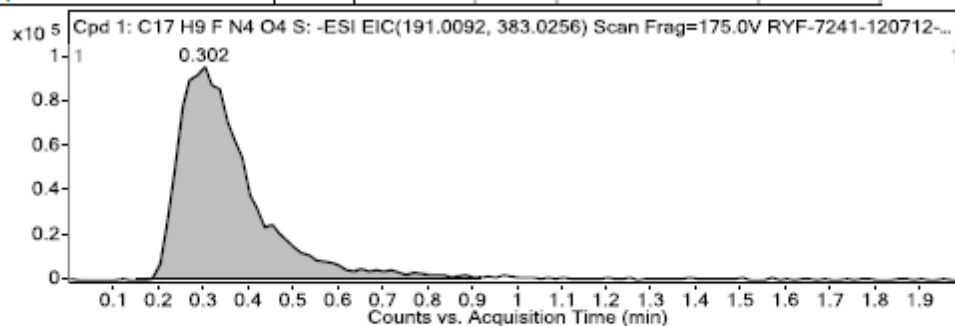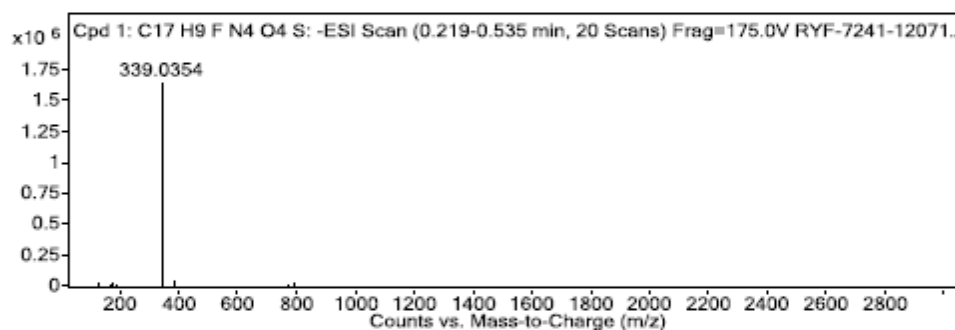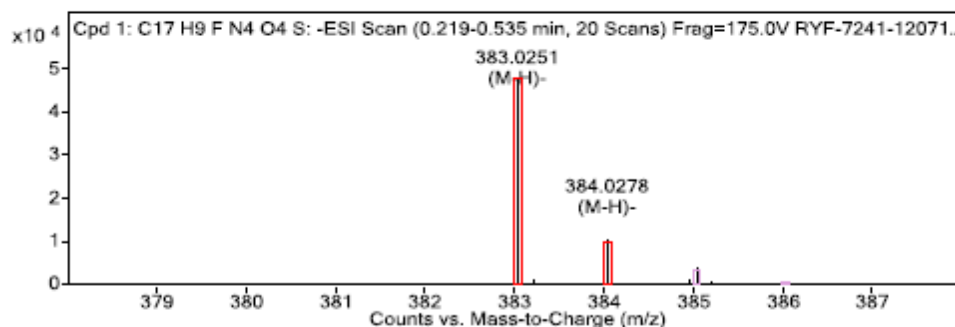

| m/z      | Calc m/z | Diff(ppm) | z | Abund      | Formula     | Ion    |
|----------|----------|-----------|---|------------|-------------|--------|
| 339.0354 |          |           |   | 1652382.63 |             |        |
| 383.0251 | 383.0256 | -1.12     | 1 | 47469.64   | C17H8FN4O4S | (M-H)- |
| 384.0278 | 384.0284 | -1.4      | 1 | 10375.45   | C17H8FN4O4S | (M-H)- |

1h

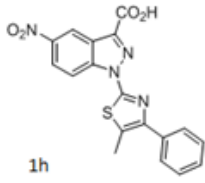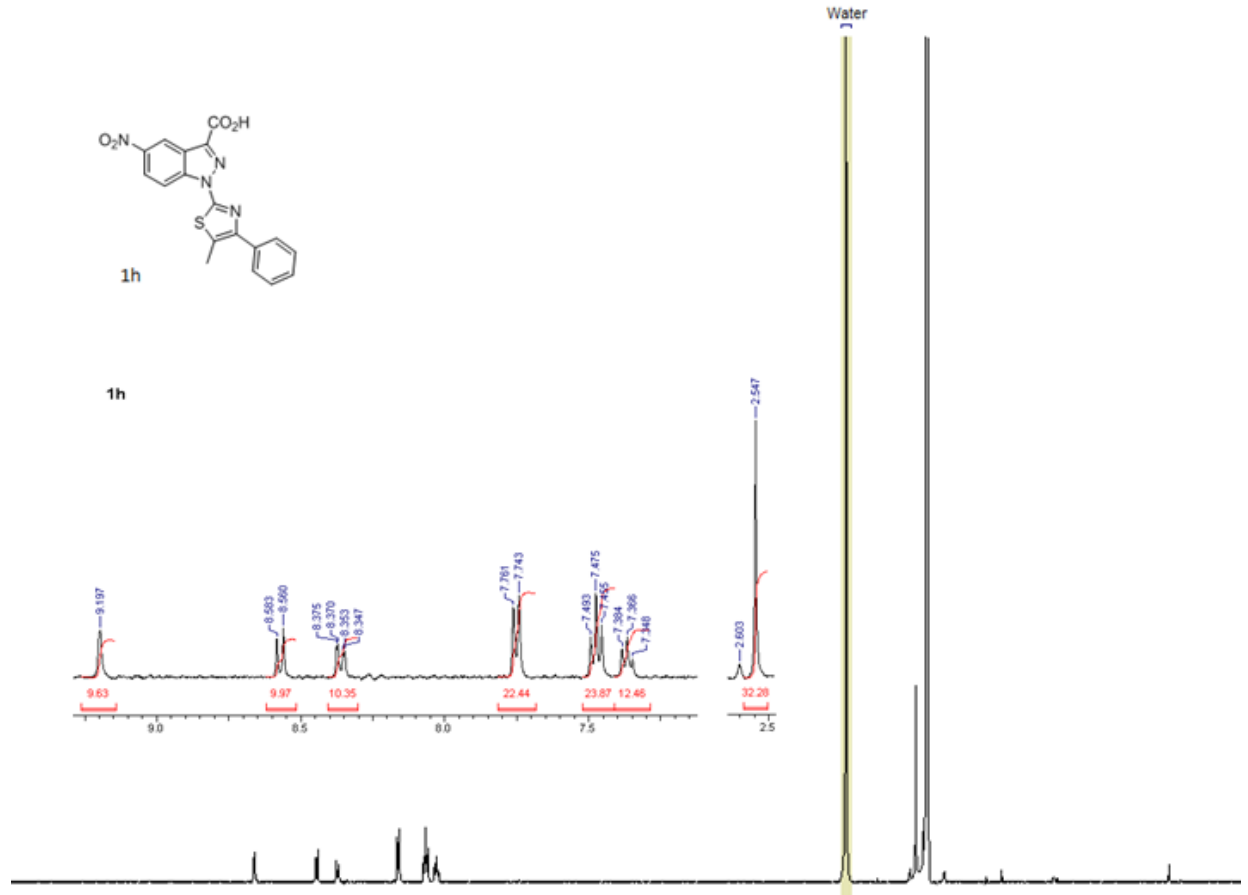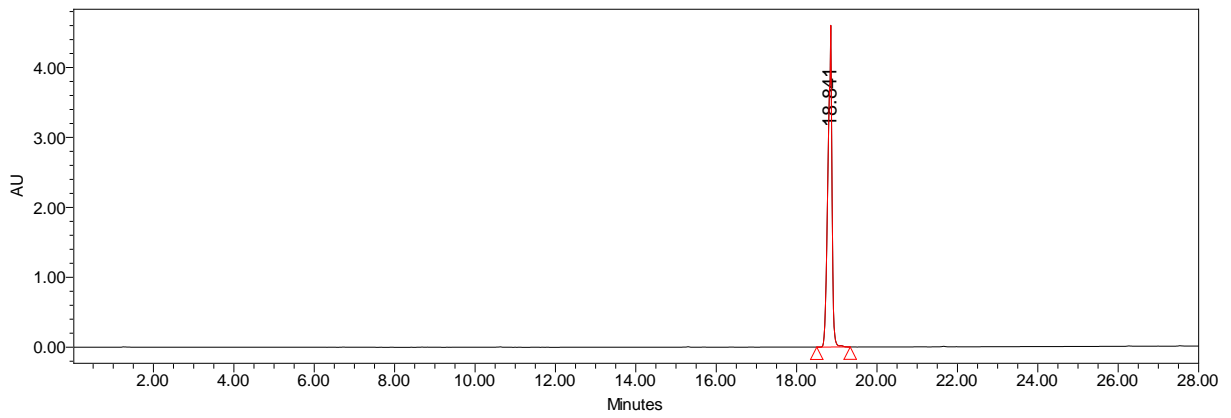

|   | Retention Time | % Area |
|---|----------------|--------|
| 1 | 18.841         | 100.00 |

Sample Name: RYF-740 Sample Location: P1-E-04 Sample Id: RYF-740 Operator: Sunia Trauger  
 Data File Name: D:\PE Sciex Data\Projects\QA TOF Data\SAT\Data\RYF-740-150911-00042.wiff Acq Time: September 15 2011, 09:57:00 AM  
 Method: D:\TOF\_Data\damethods\HRES\_FIA\_2M\_0.2R\_ANM\ANM1efc.xml

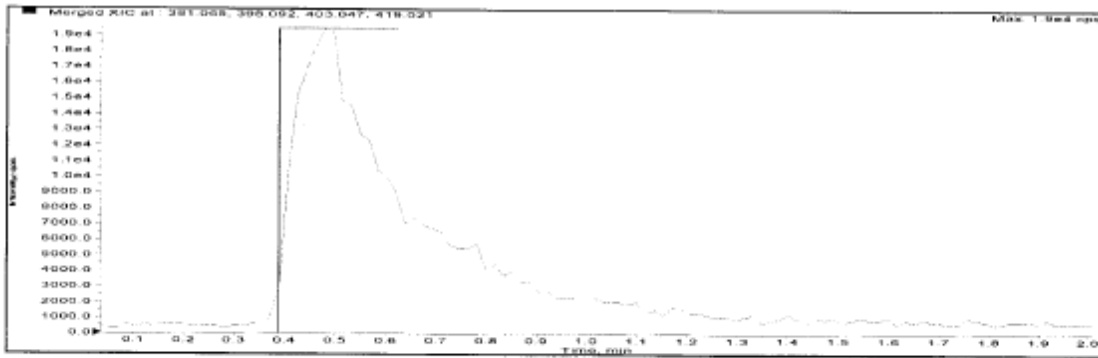

Merged XIC, Period# : 1 Experiment# : 1

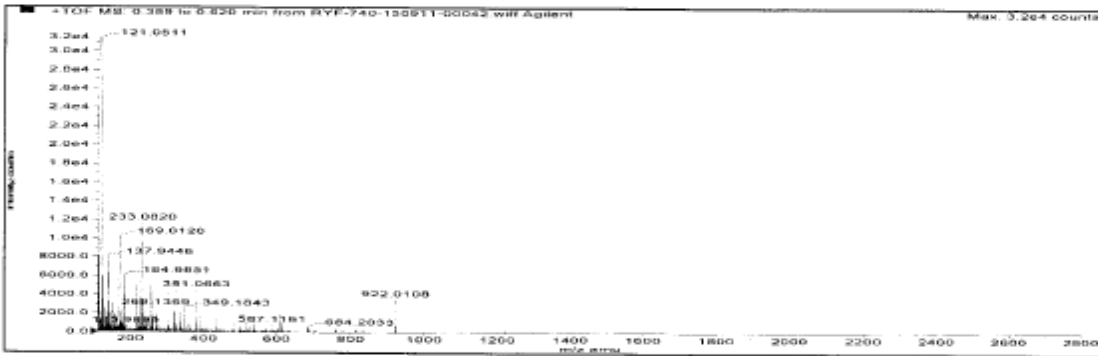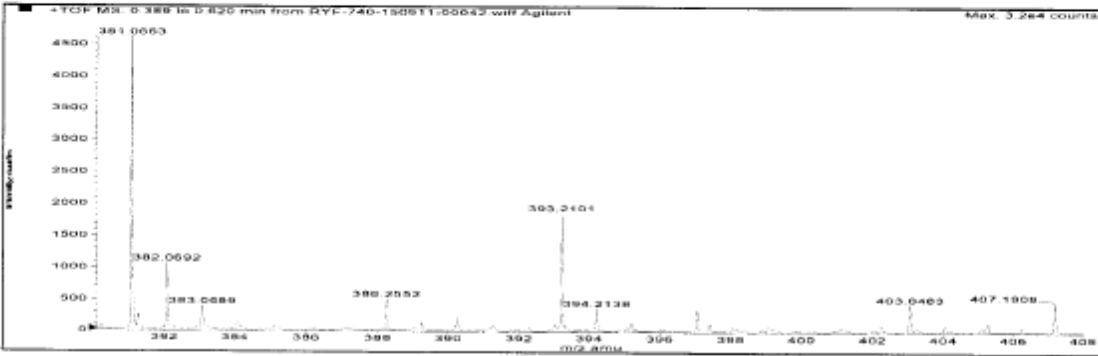

| Formula     | Compound name | Mass      | Peak RT (min) | Peak area  | Description |
|-------------|---------------|-----------|---------------|------------|-------------|
| C18H12N4O4S | --            | 380.05793 | 0.49          | 1.38889 E5 | --          |

| Species            | Abundance (counts) | Ion Mass  | Measured Mass | Error (mDa) | Error (ppm) | Ret. Time Error (min) |
|--------------------|--------------------|-----------|---------------|-------------|-------------|-----------------------|
| [M+H] <sup>+</sup> | 4733.09            | 381.05520 | 381.08635     | 1.14490     | 3.00        | --                    |

1i

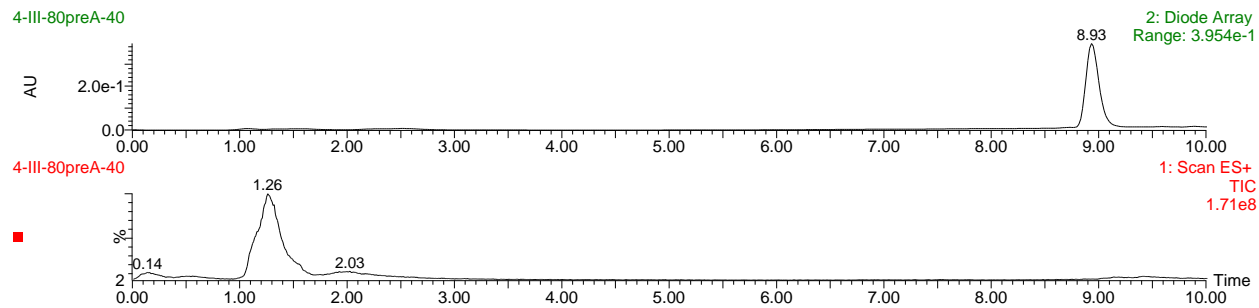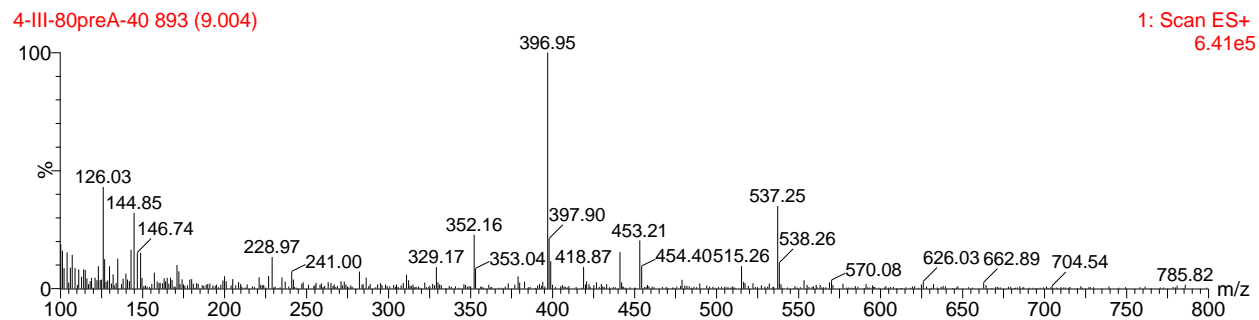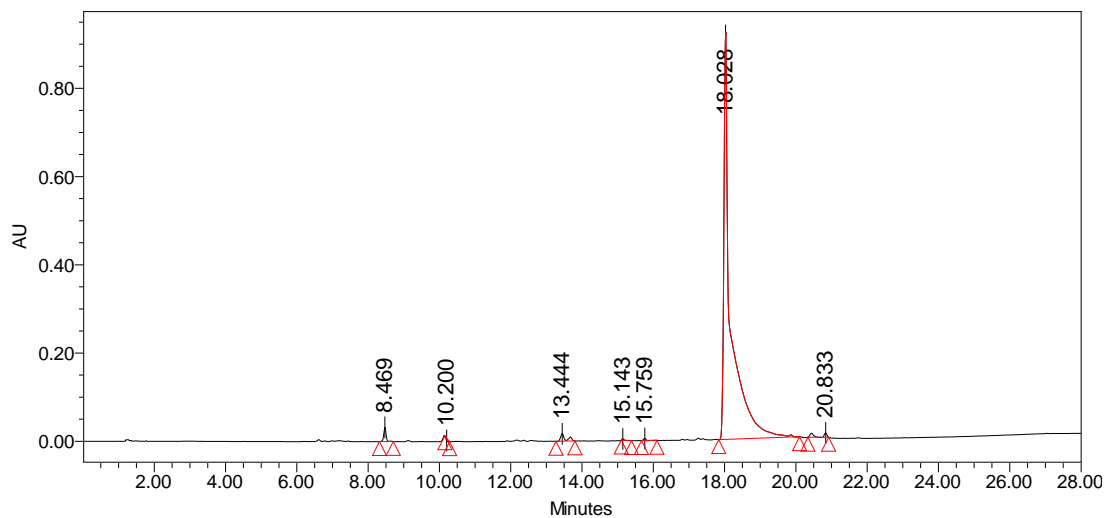

|   | Retention Time | % Area |
|---|----------------|--------|
| 1 | 8.469          | 1.14   |
| 2 | 10.200         | 0.21   |
| 3 | 13.444         | 1.27   |
| 4 | 15.143         | 0.10   |
| 5 | 15.759         | 0.22   |
| 6 | 18.028         | 96.17  |
| 7 | 20.833         | 0.90   |

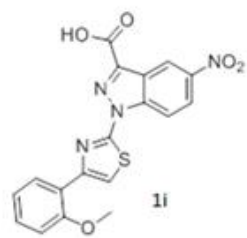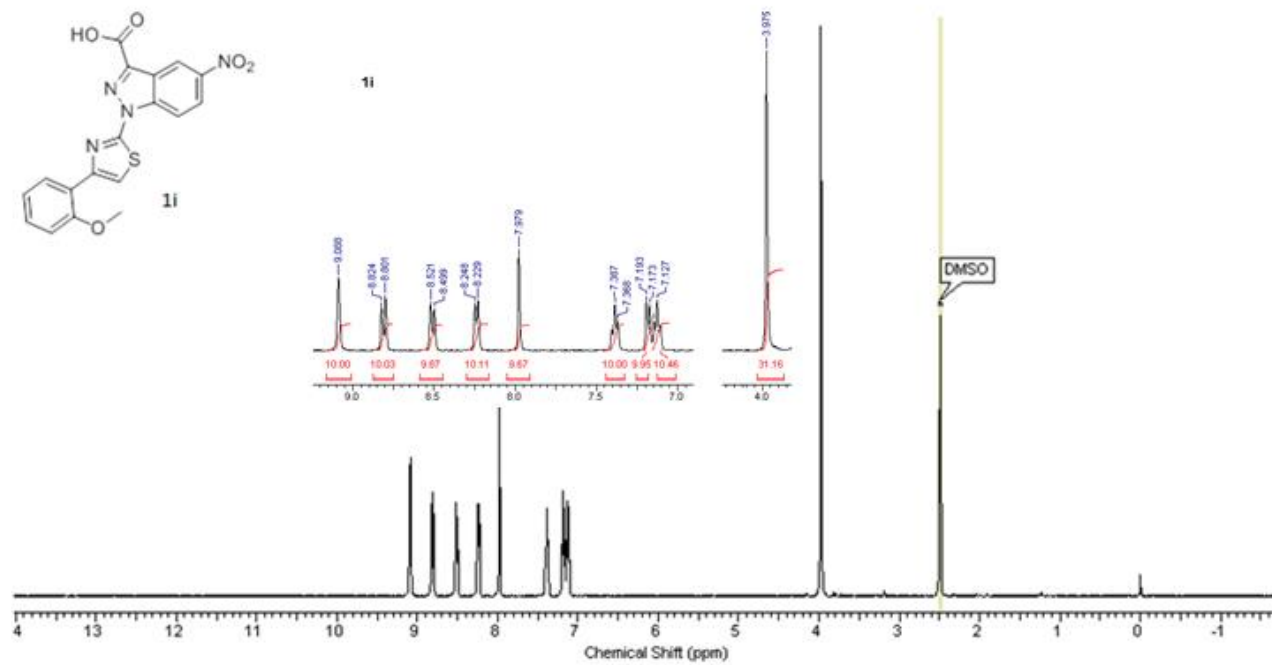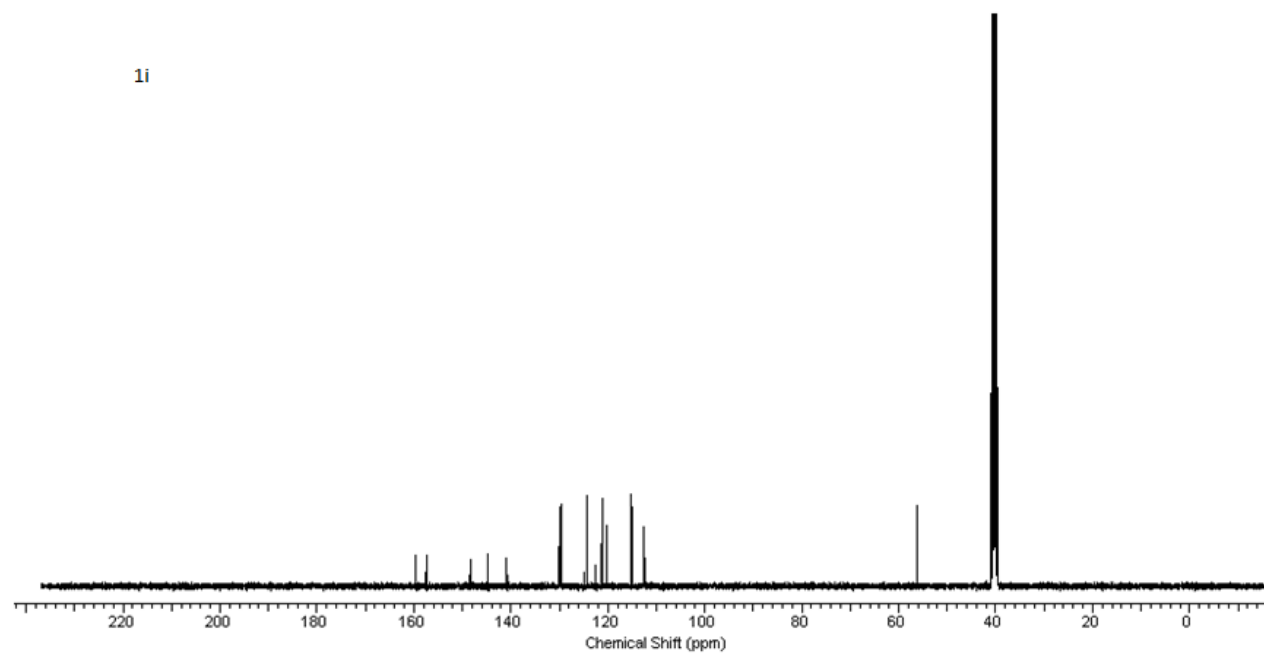

|               |                      |            |              |                        |
|---------------|----------------------|------------|--------------|------------------------|
| Sample Name   | RYP-760              | Position   | P1-D05       | Instrument Name        |
| User Name     | Revital Freedman     | Inj Vol    | 0.2          | IRM Calibration Status |
| Data Filename | RYP-7601-160712-0048 | ACQ Method | OA_FIA_NEG.M | Comment                |
| Acquired Time | 7/17/2012 1:08:01 AM |            |              |                        |

| Compound Label         | RT    | Mass     | Abund | Formula         | Tot Mass |
|------------------------|-------|----------|-------|-----------------|----------|
| Cpd 1: C18 H12 N4 O5 S | 0.296 | 396.0535 | 34278 | C18 H12 N4 O5 S | 396.0528 |

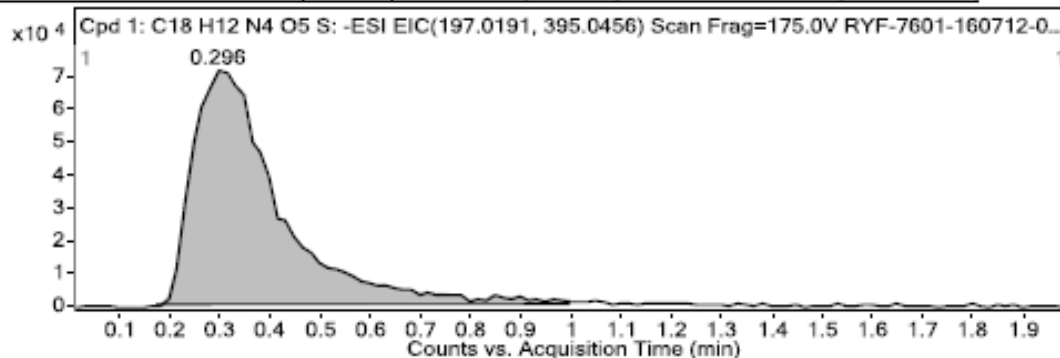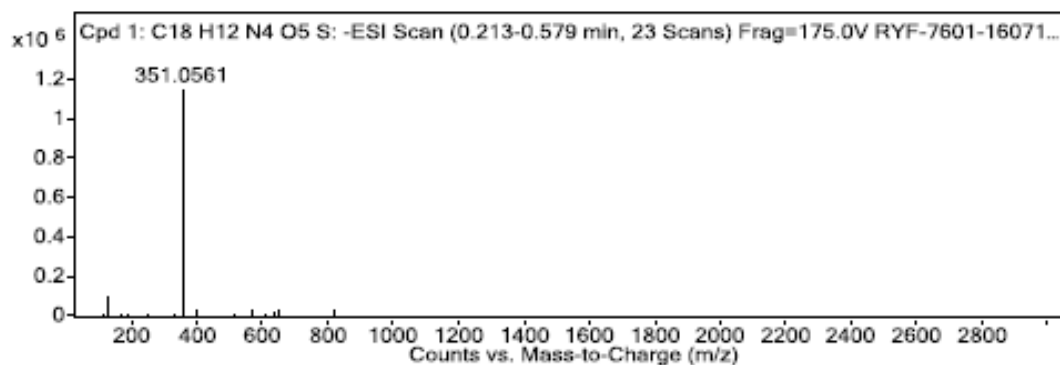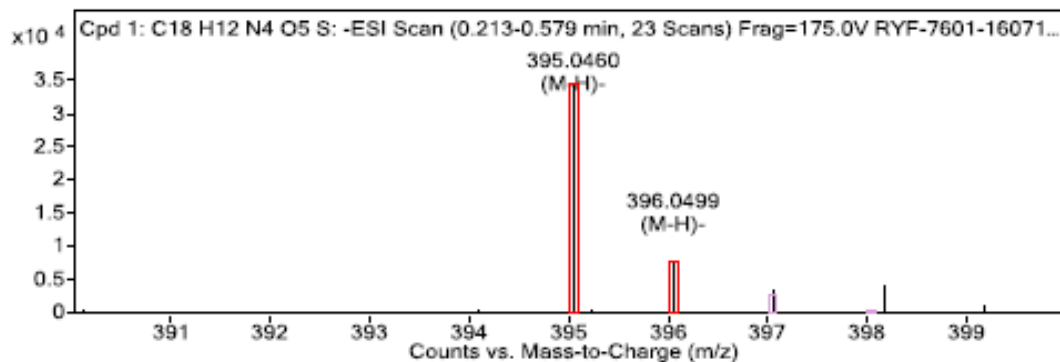

| m/z      | Calc m/z | Diff(ppm) | z | Abund      | Formula     | Ion    |
|----------|----------|-----------|---|------------|-------------|--------|
| 351.0561 |          |           |   | 1154128.75 |             |        |
| 395.046  | 395.0456 | 1.05      | 1 | 34278.25   | C18H11N4O5S | (M-H)- |
| 396.0499 | 396.0484 | 3.8       | 1 | 7887.01    | C18H11N4O5S | (M-H)- |

1j

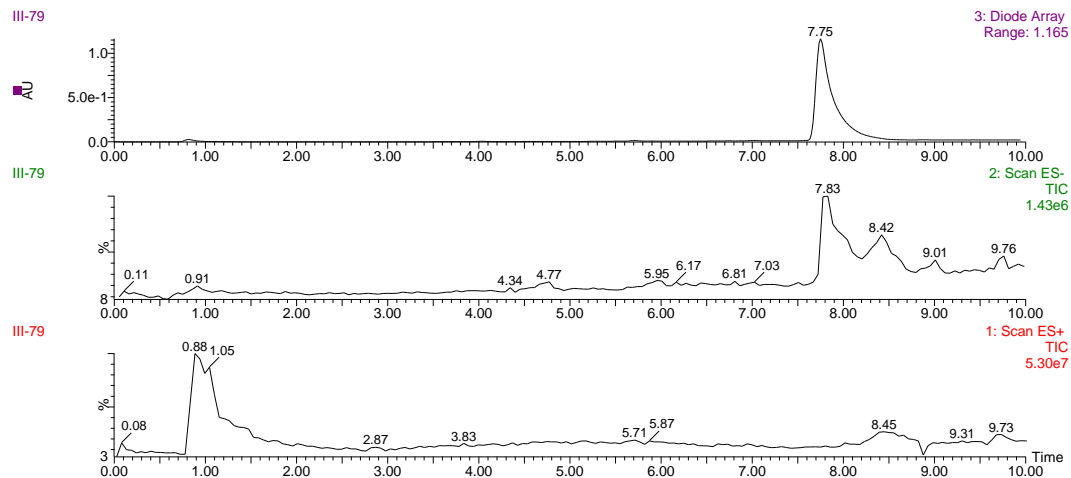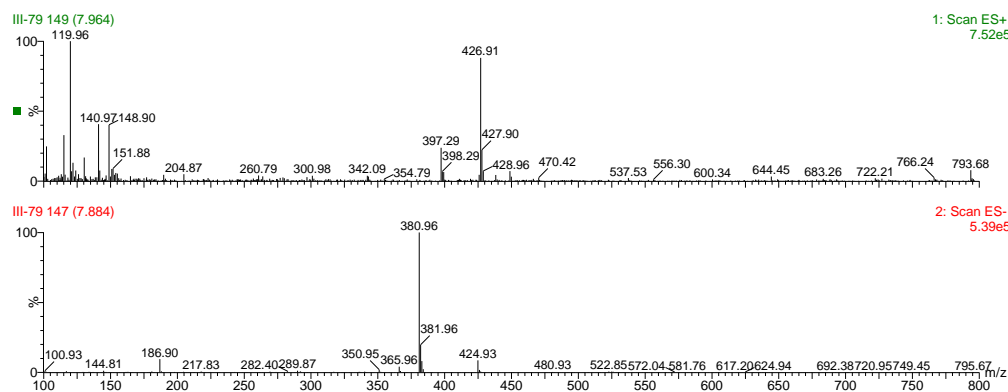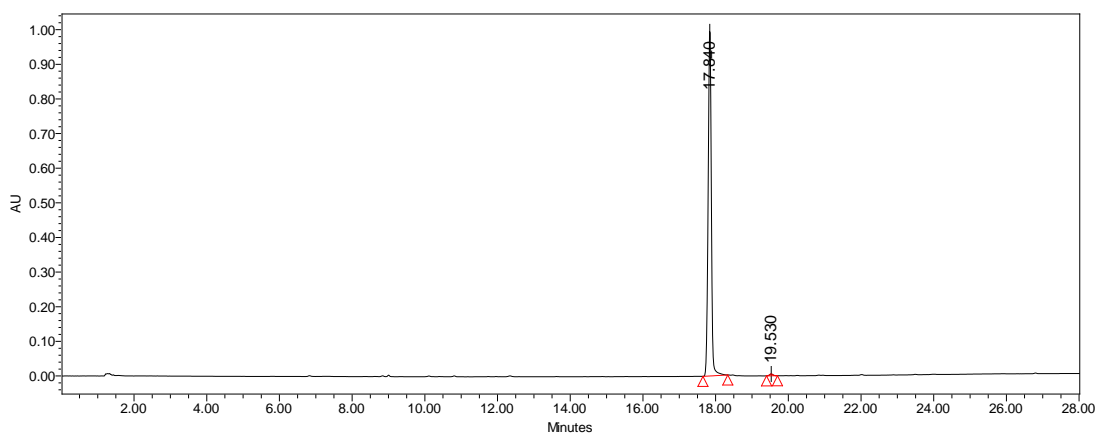

|   | Retention Time | % Area |
|---|----------------|--------|
| 1 | 17.840         | 99.43  |



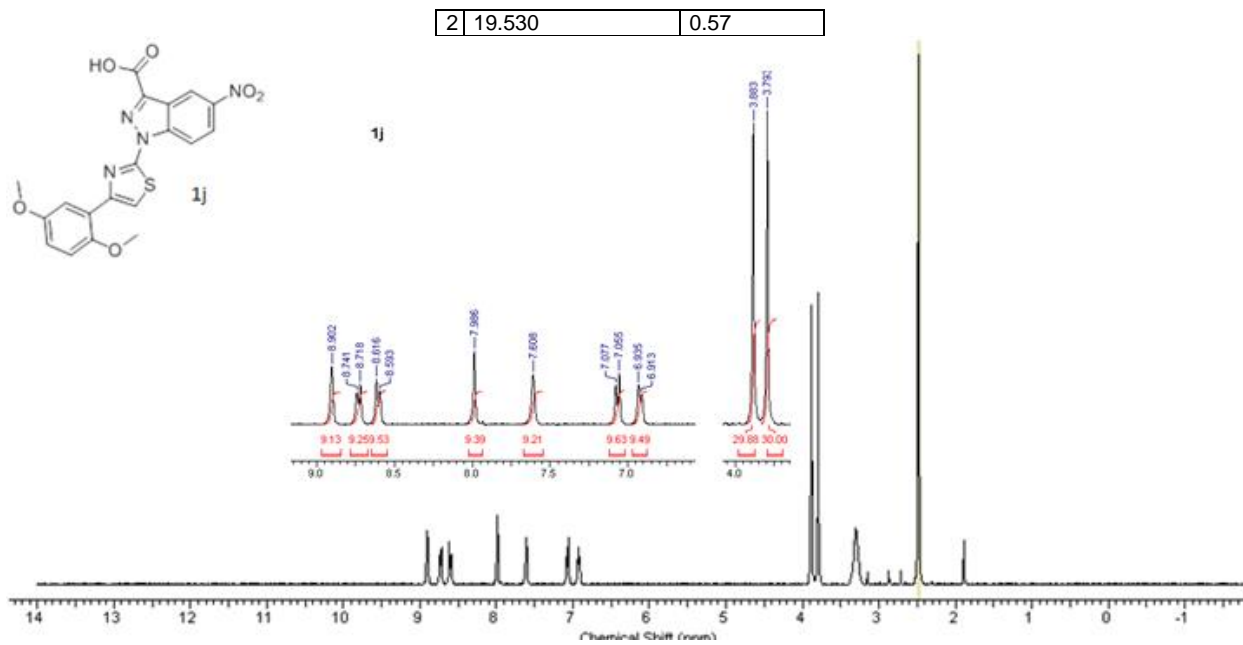

Sample Name: RYF-759 Sample Location: P1-B-07 Sample Id: RYF-759 Operator: Sunia Trauger  
 Data File Name: D:\PE\_Sciex\_Data\Projects\QA\_TOF\_Data\SAT\Data\RYF-759-130911-00231.wiff Acq Time: September 13 2011, 03:56:00 PM  
 Method: D:\TOF\_Data\damethods\HRES\_FIA\_2M\_0\_2R\_ANM.ANM\efc.xml

One or more scans have failed IRM. Review the data file for details.

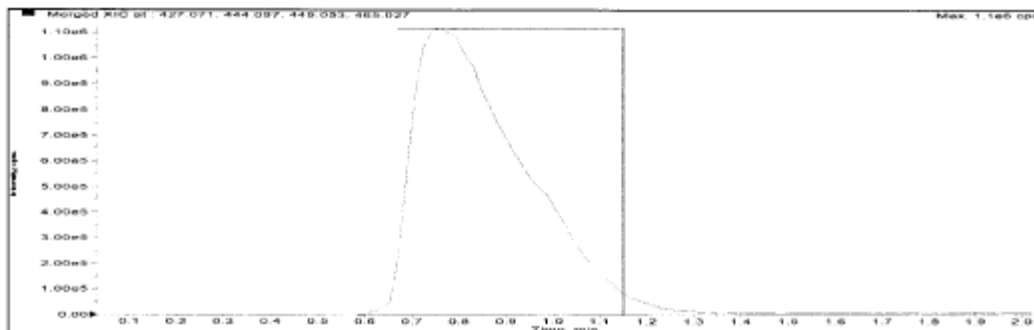

Merged XIC, Period# : 1 Experiment# : 1

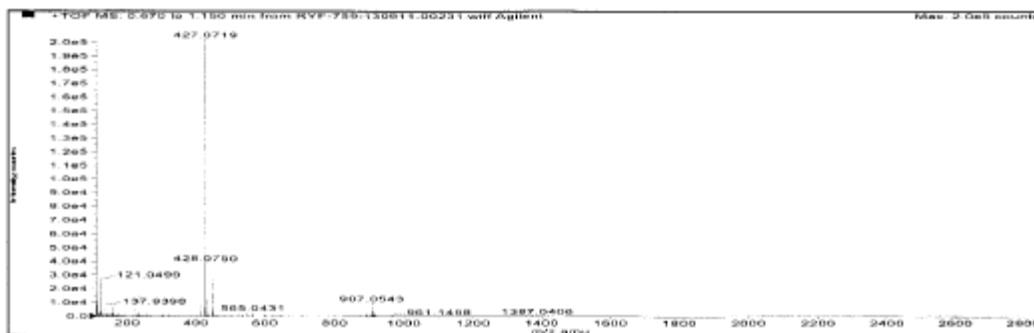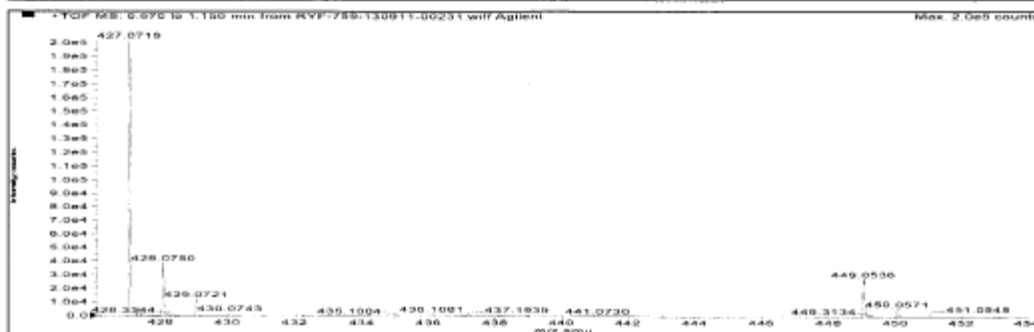

| Formula     | Compound name | Mass      | Peak RT (min) | Peak area  | Description |
|-------------|---------------|-----------|---------------|------------|-------------|
| C19H14N4O6S | --            | 426.06340 | 0.76          | 1.80819 E7 | --          |

| Species             | Abundance (counts) | Ion Mass  | Measured Mass | Error (mDa) | Error (ppm) | Ret. Time Error (min) |
|---------------------|--------------------|-----------|---------------|-------------|-------------|-----------------------|
| [M+H] <sup>+</sup>  | 210862.52          | 427.07068 | 427.07188     | 1.20185     | 2.81        | --                    |
| [M+Na] <sup>+</sup> | 28724.05           | 449.05263 | 449.05358     | 0.93759     | 2.09        | --                    |

1k

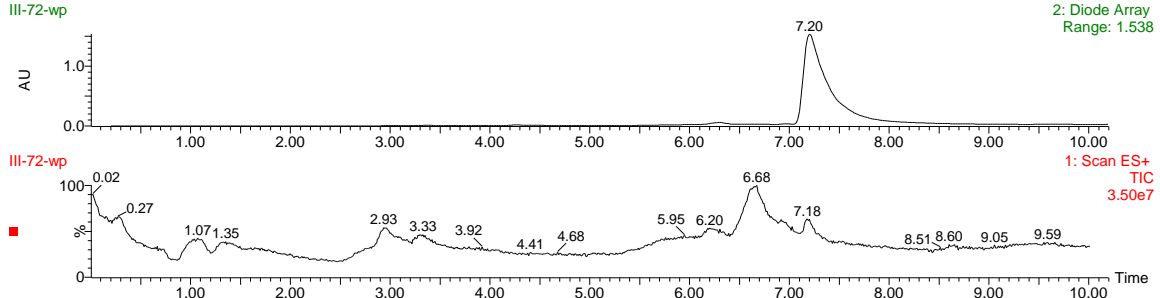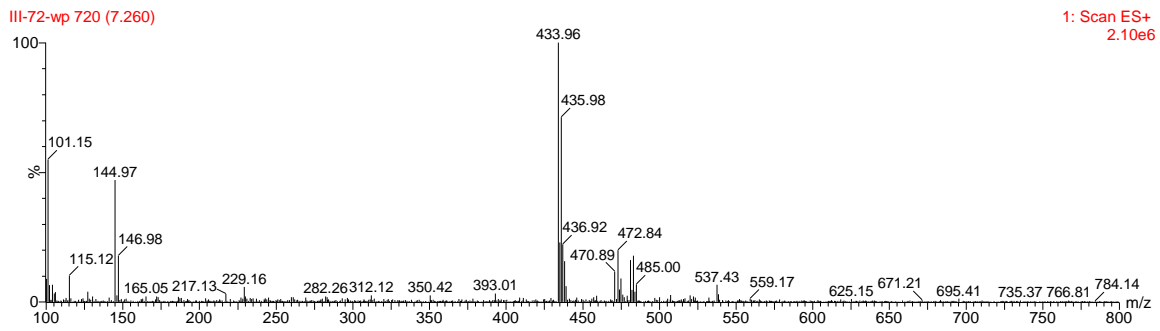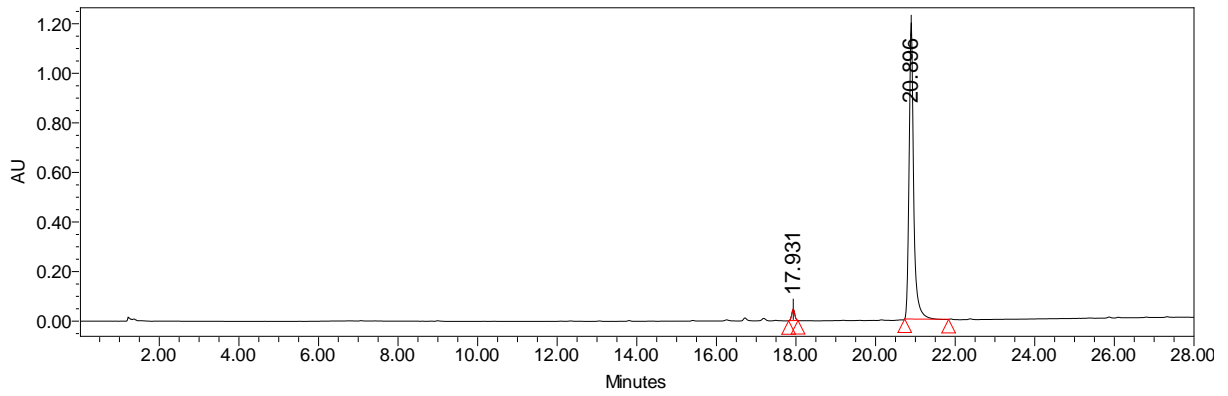

|   | Retention Time | % Area |
|---|----------------|--------|
| 1 | 17.931         | 2.51   |
| 2 | 20.896         | 97.49  |

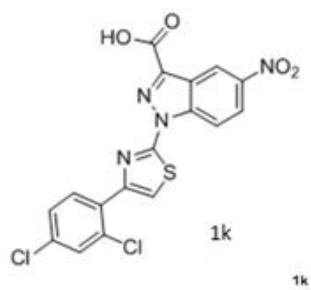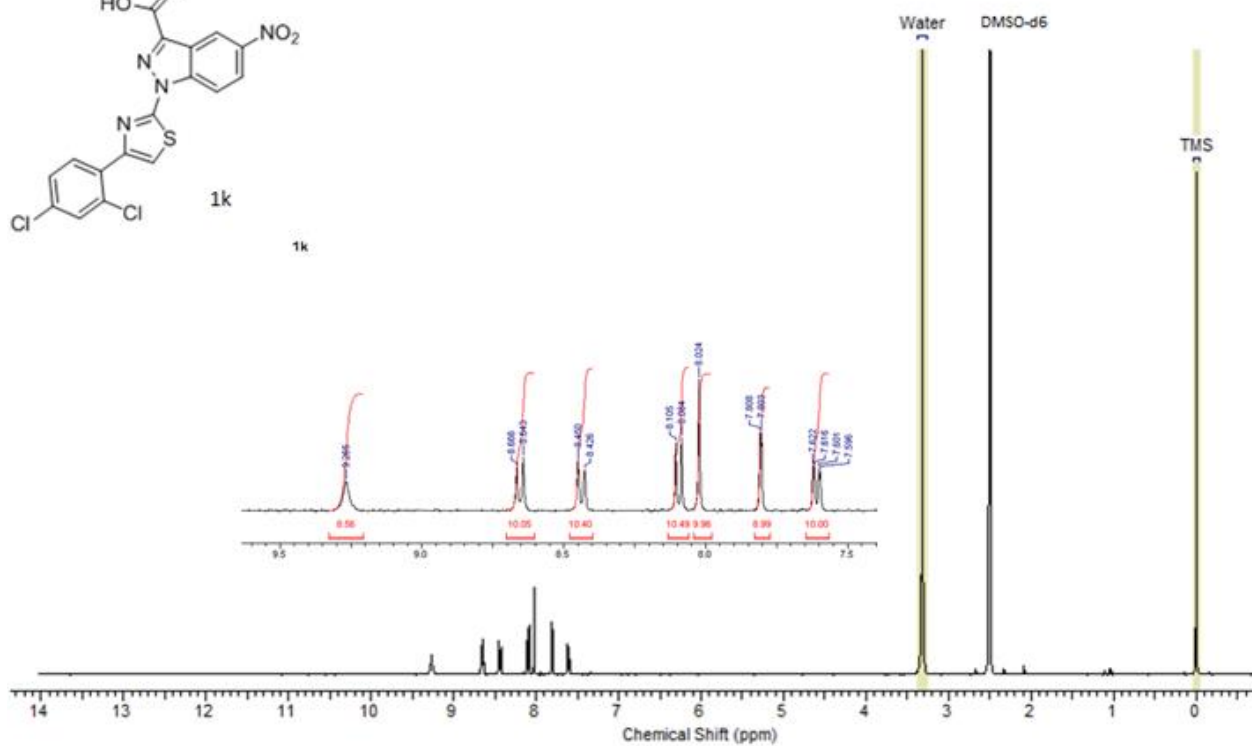

**Sample Name** RYF-752                      **Position** P1-A01                      **Instrument Name**  
**User Name** Revital Freedman              **Inj Vol** 0.2                      **IRM Calibration Status**  
**Data Filename** RYF-7521-120712-0038      **ACQ Method** OA\_FIA\_NEG.M              **Comment**  
**Acquired Time** 7/12/2012 3:08:13 PM

| Compound Label            | RT    | Mass    | Abund | Formula            | Tot Mass |
|---------------------------|-------|---------|-------|--------------------|----------|
| Cpd 1: C17 H8 Cl2 N4 O4 S | 0.357 | 433.964 | 8234  | C17 H8 Cl2 N4 O4 S | 433.9643 |

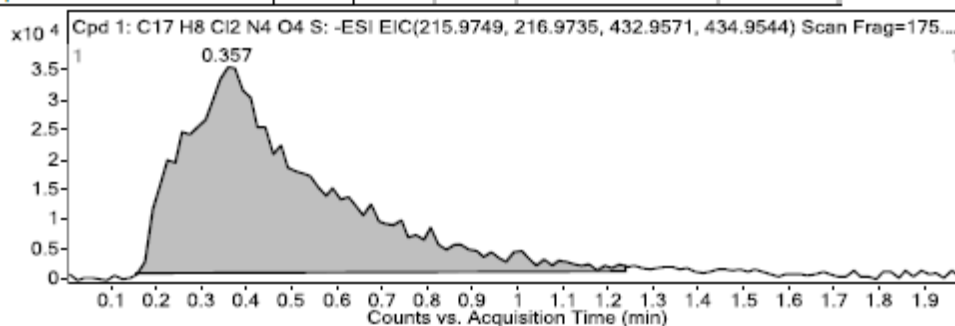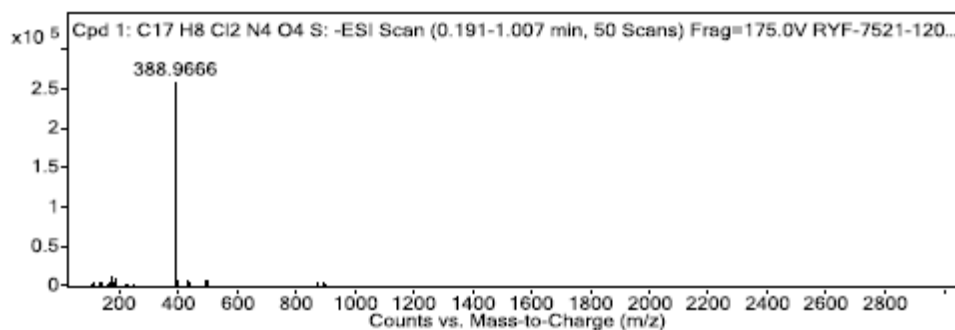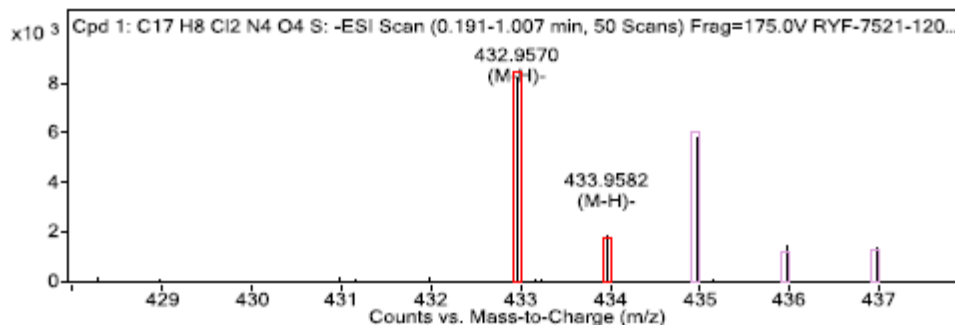

| m/z      | Calc m/z | Diff(ppm) | z | Abund     | Formula       | Ion    |
|----------|----------|-----------|---|-----------|---------------|--------|
| 388.9666 |          |           |   | 259639.95 |               |        |
| 432.957  | 432.9571 | -0.13     | 1 | 8233.72   | C17H7Cl2N4O4S | (M-H)- |
| 433.9582 | 433.9598 | -3.65     | 1 | 1943.51   | C17H7Cl2N4O4S | (M-H)- |

11

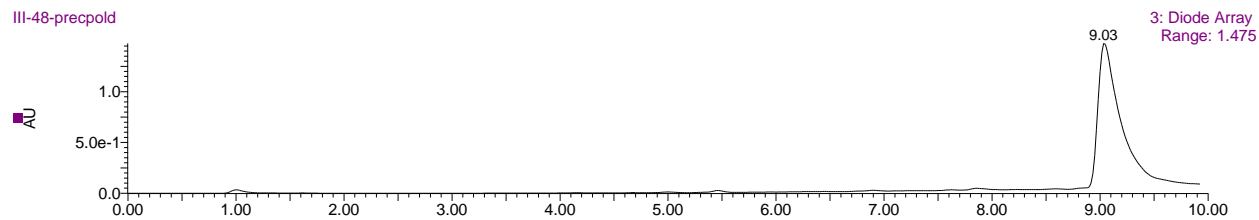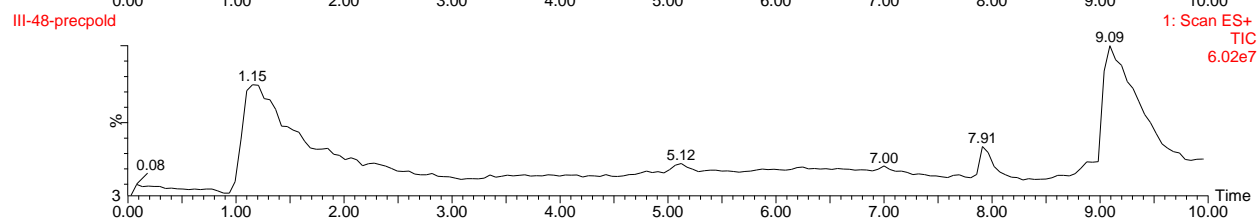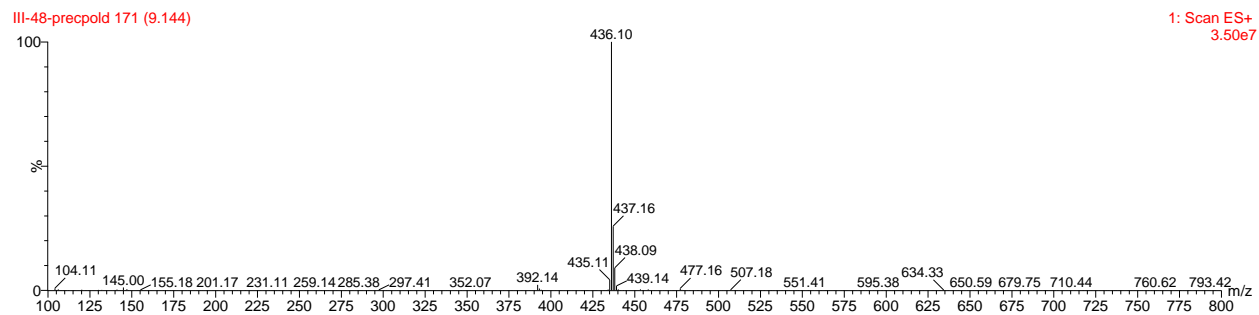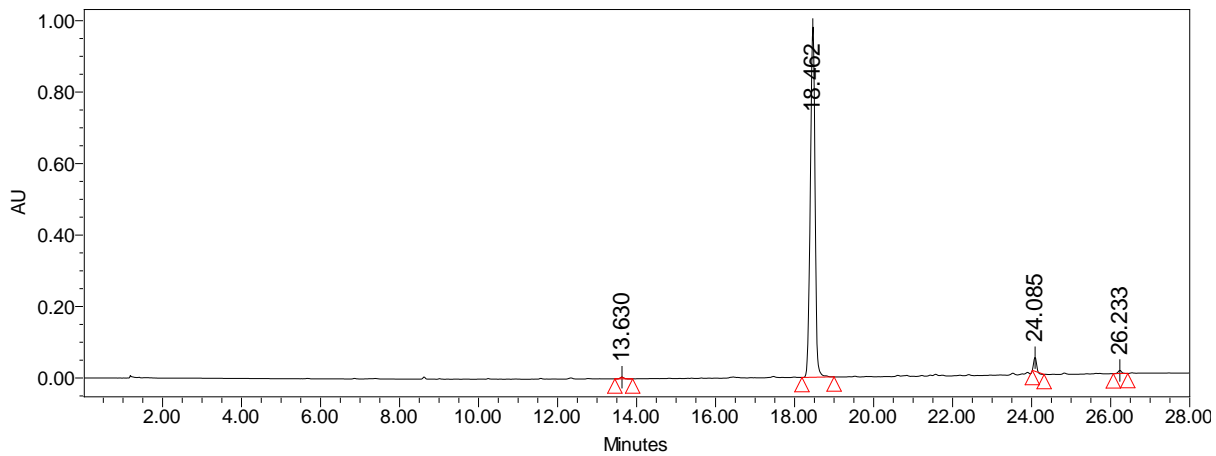

|   | Retention Time | % Area |
|---|----------------|--------|
| 1 | 13.630         | 0.36   |
| 2 | 18.462         | 96.59  |
| 3 | 24.085         | 2.43   |
| 4 | 26.233         | 0.62   |

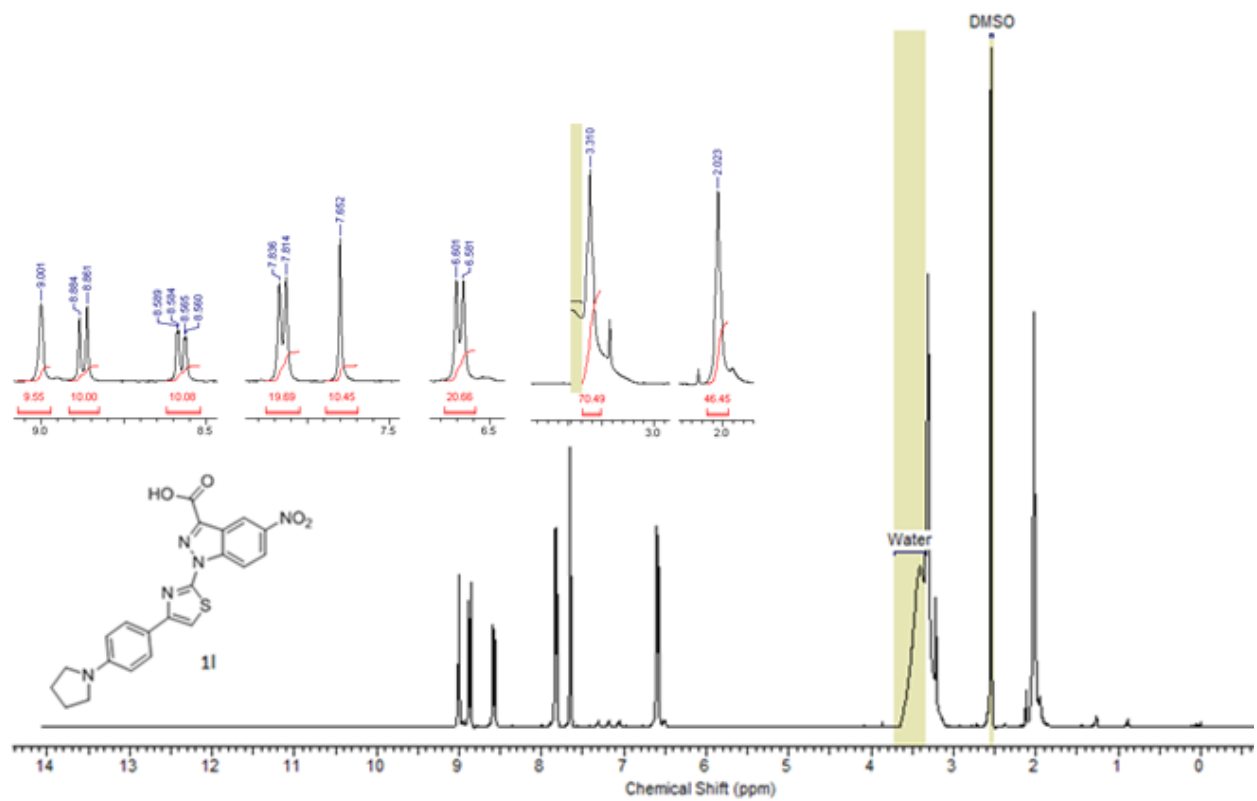

1I

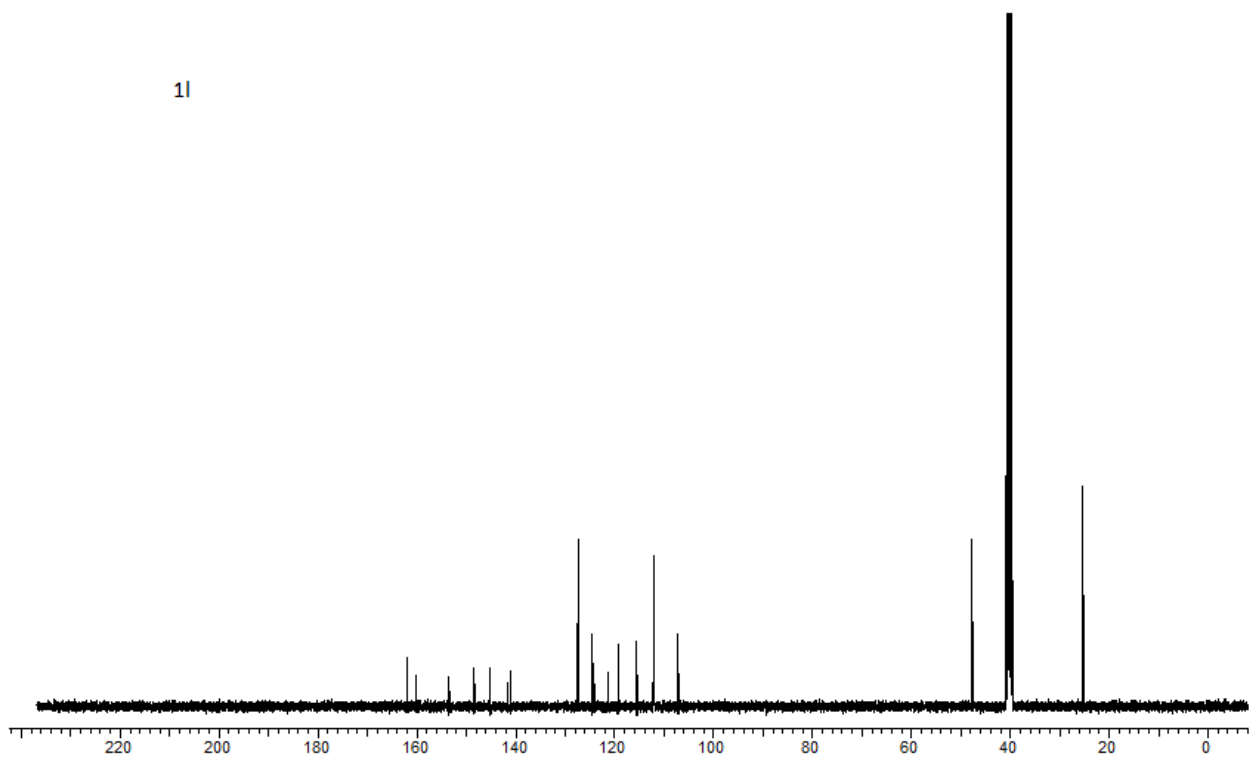

Sample Name: RYF-728 Sample Location: P1-B-04 Sample Id: RYF-728 Operator: Sunia Trauger  
 Data File Name: D:\PE Sciex Data\Projects\QA\_TOF Data\SAT\Data\RYF-728-130911-00228.wiff Acq Time: September 13 2011, 03:41:32 PM  
 Method: D:\TOF\_Data\methods\HRES\_FIA\_2M\_0.2R\_ANM\ANM\efc.xml

One or more scans have failed IRM. Review the data file for details.

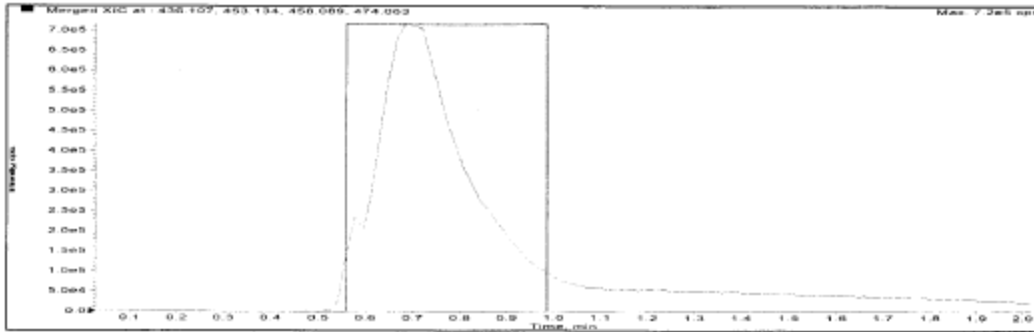

Merged XIC, Period# : 1 Experiment# : 1

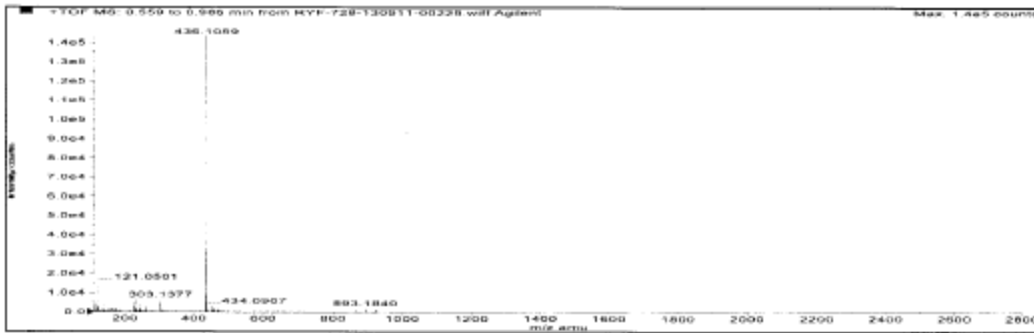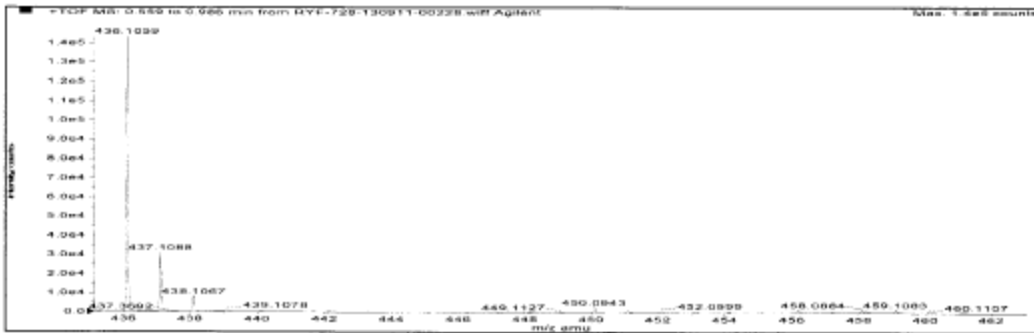

| Formula     | Compound name | Mass      | Peak RT (min) | Peak area  | Description |
|-------------|---------------|-----------|---------------|------------|-------------|
| C21H17N5O4S | --            | 435.10012 | 0.89          | 9.29890 E8 | --          |

| Species             | Abundance (counts) | Ion Mass  | Measured Mass | Error (mDa) | Error (ppm) | Ret. Time Error (min) |
|---------------------|--------------------|-----------|---------------|-------------|-------------|-----------------------|
| [M+H] <sup>+</sup>  | 144592.59          | 436.10740 | 436.10594     | -1.45777    | -3.34       | --                    |
| [M+Na] <sup>+</sup> | 1935.79            | 458.08935 | 458.08842     | -0.92864    | -2.03       | --                    |



# 1m

III-62-RP-36

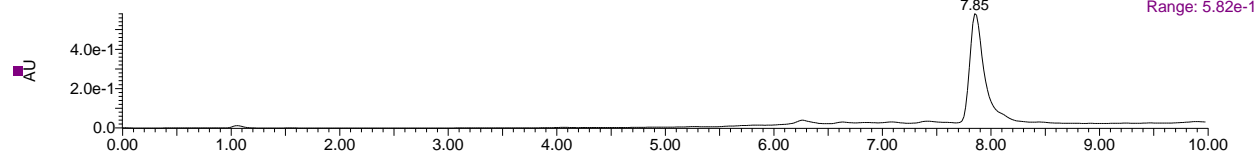

III-62-RP-36

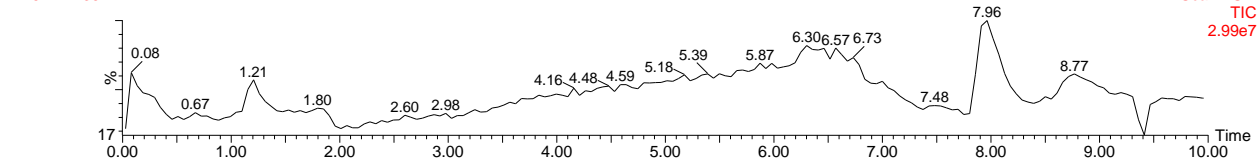

III-62-RP-36 149 (7.964)

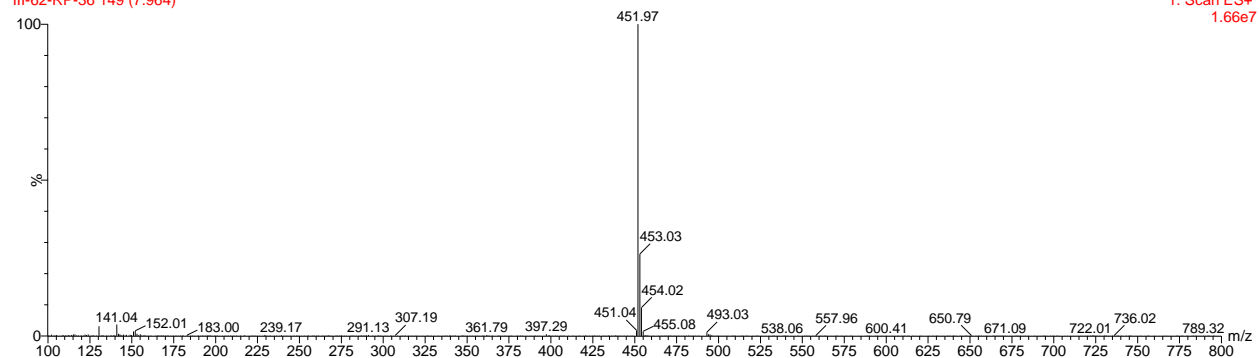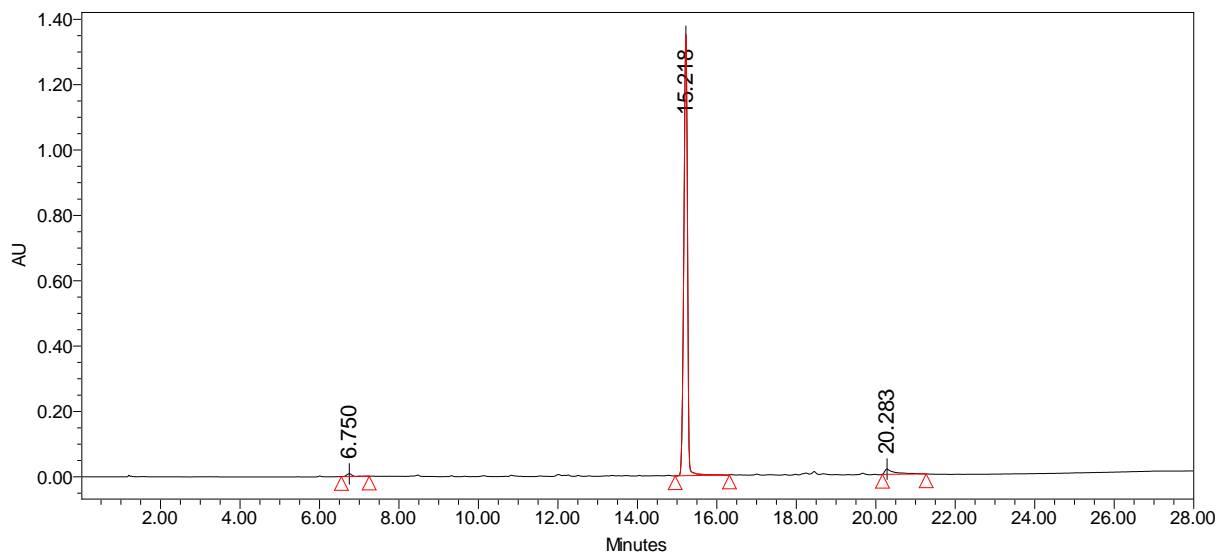

|   | Retention Time | % Area |
|---|----------------|--------|
| 1 | 6.750          | 0.88   |
| 2 | 15.218         | 95.95  |
| 3 | 20.283         | 3.17   |

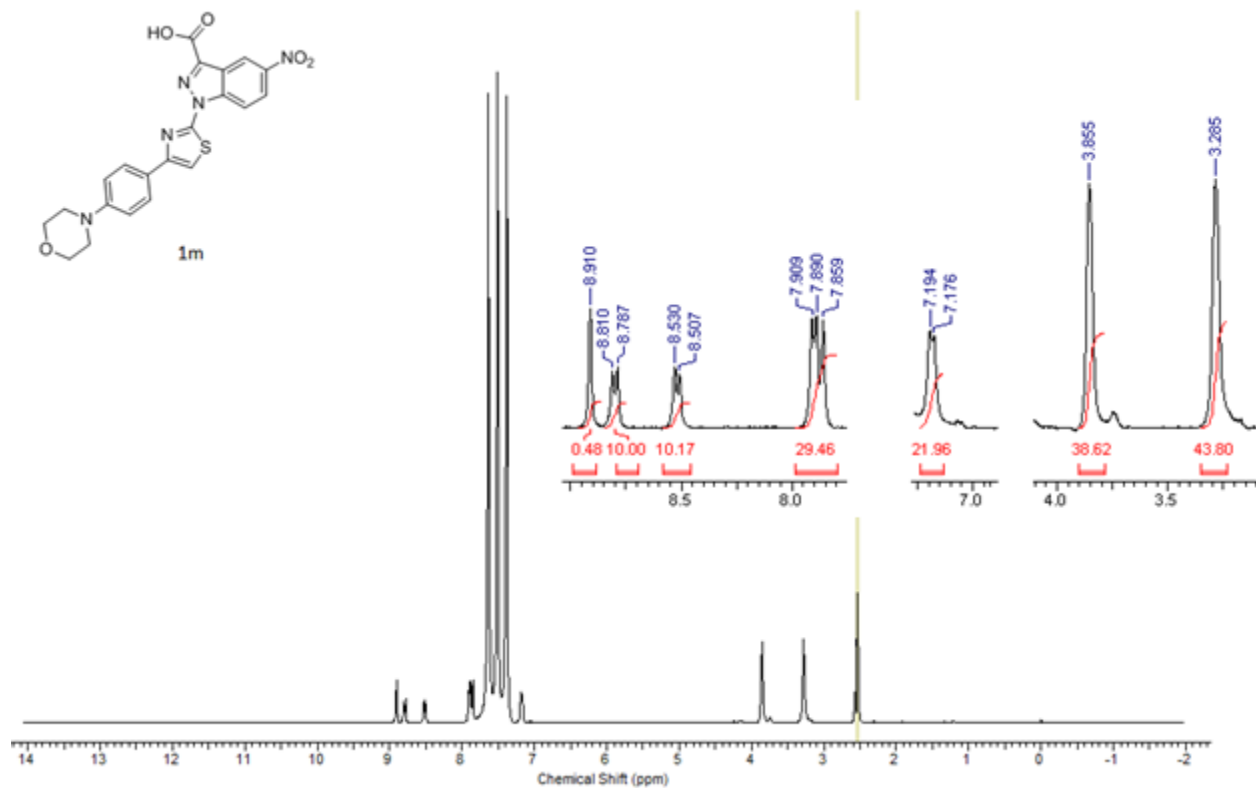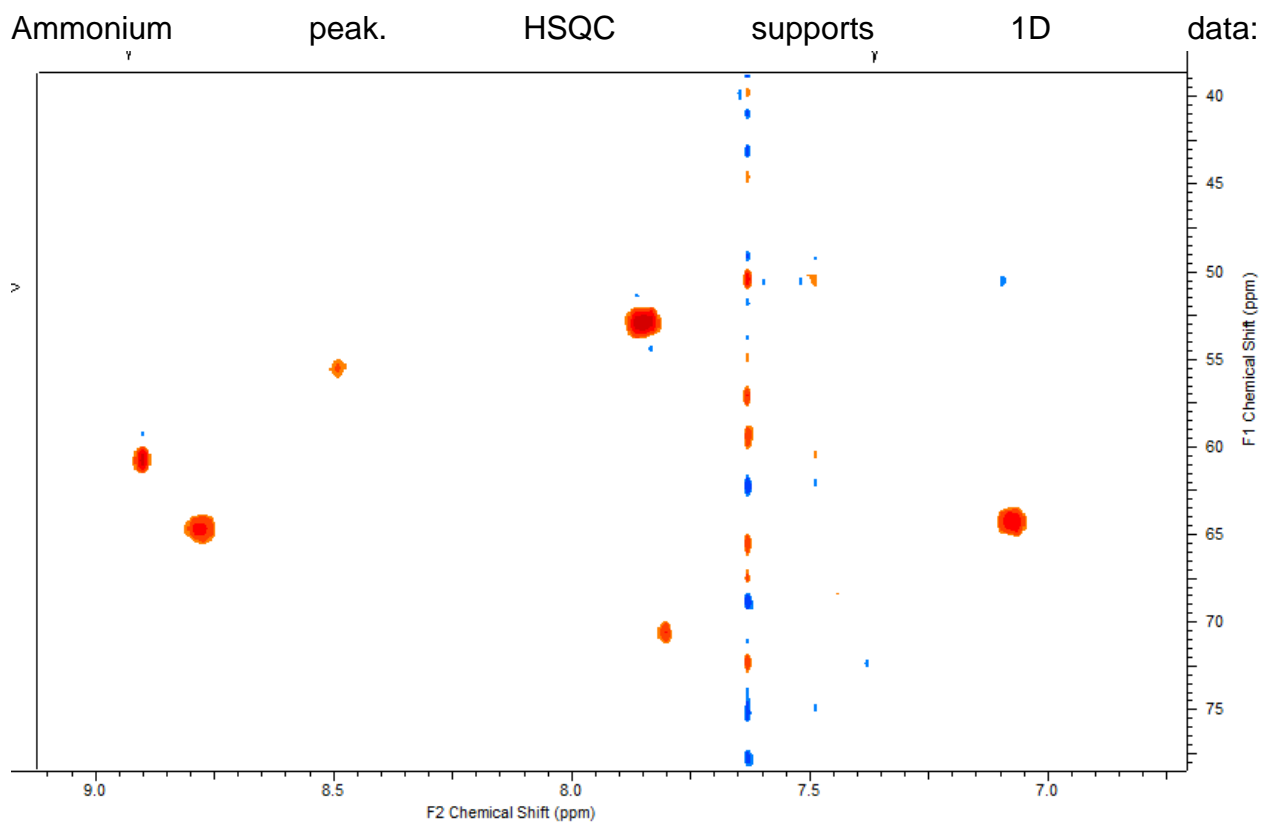

Sample Name: RYF-742 Sample Location: P1-D-09 Sample Id: RYF-742 Operator: Revital Freedman  
 Data File Name: D:\PE Sciex Data\Projects\IOA\_TOF\_Data\Chorev\Data\RYF-7421-120911-00189.wiff Acq Time: September 12 2011, 04:56:14 PM  
 Method: D:\TOF\_Data\damethods\HRES\_FIA\_2M\_0.2R\_ANM.ANM\efc.xml

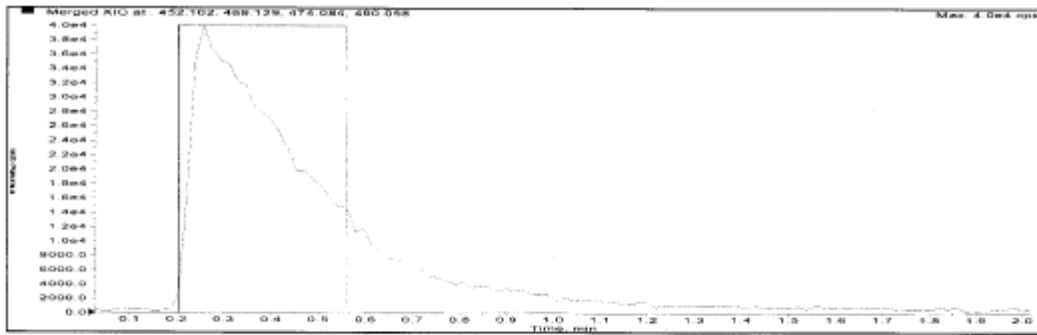

Merged XIC, Period#: 1 Experiment#: 1

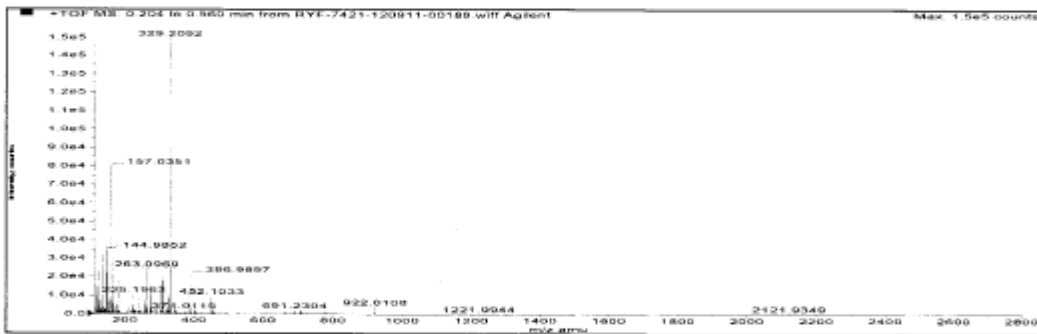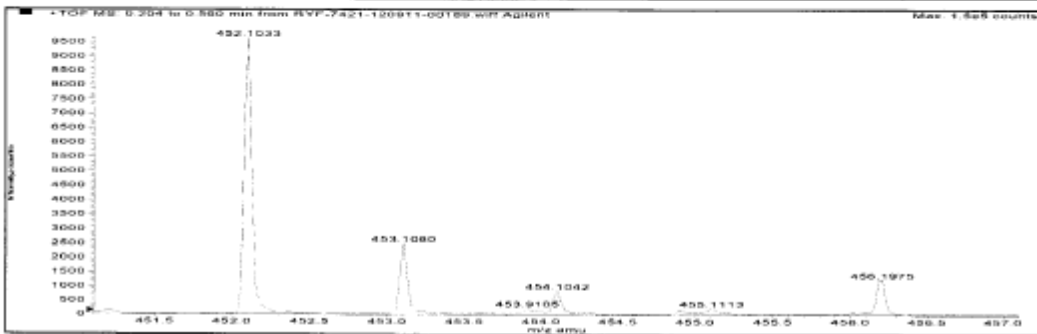

| Formula     | Compound name | Mass      | Peak RT (min) | Peak area  | Description |
|-------------|---------------|-----------|---------------|------------|-------------|
| C21H17N5O5S | --            | 451.09504 | 0.26          | 4.22261 E5 | --          |

| Species            | Abundance (counts) | Ion Mass  | Measured Mass | Error (mDa) | Error (ppm) | Ret. Time Error (min) |
|--------------------|--------------------|-----------|---------------|-------------|-------------|-----------------------|
| [M+H] <sup>+</sup> | 9737.45            | 452.10232 | 452.10334     | 1.02404     | 2.27        | --                    |

1n

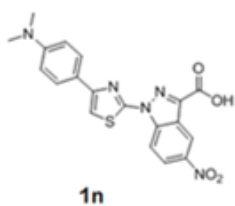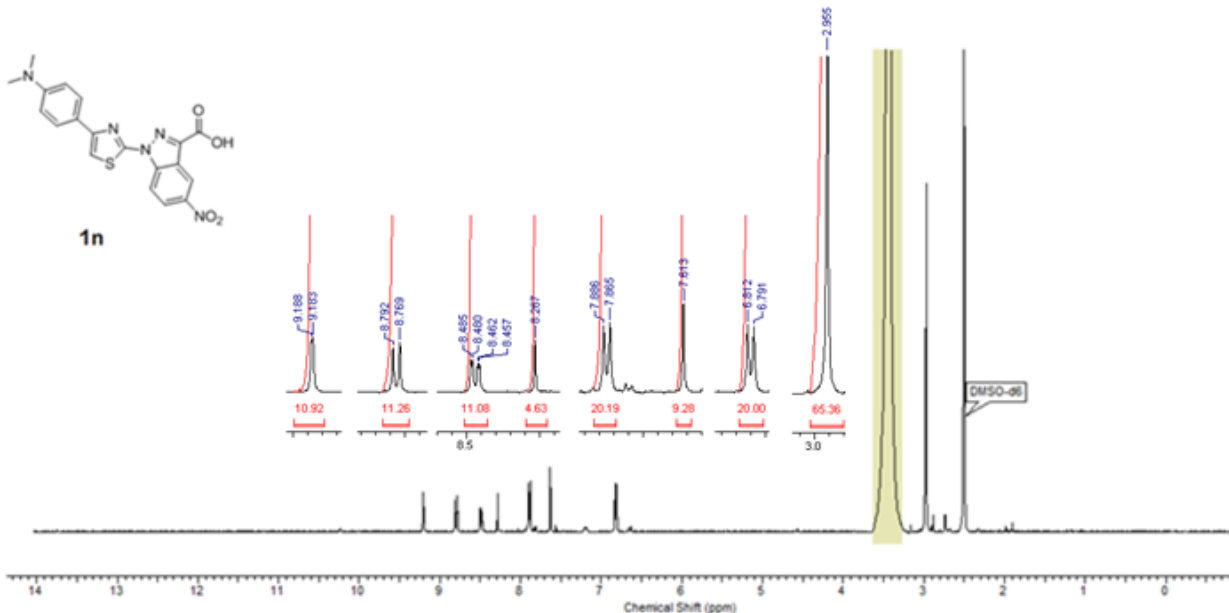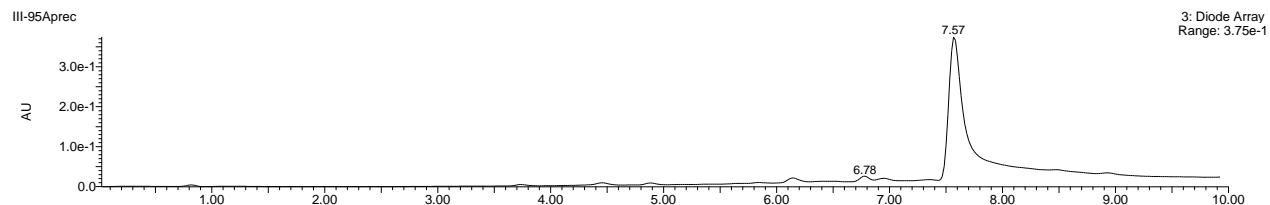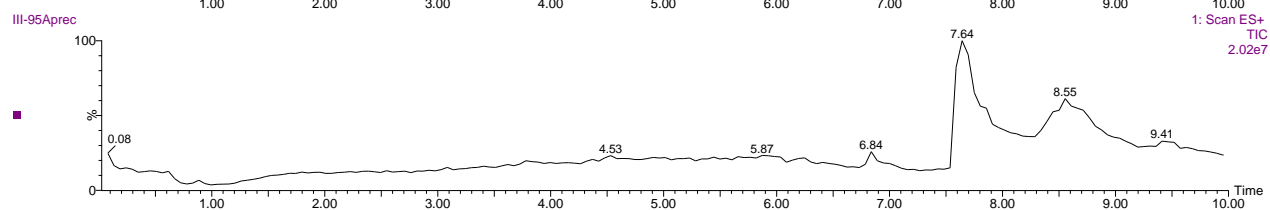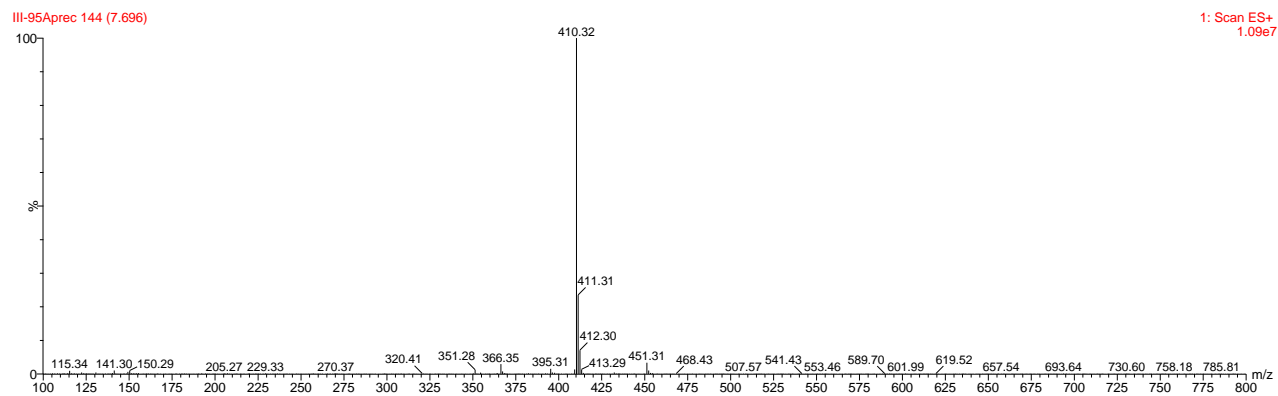

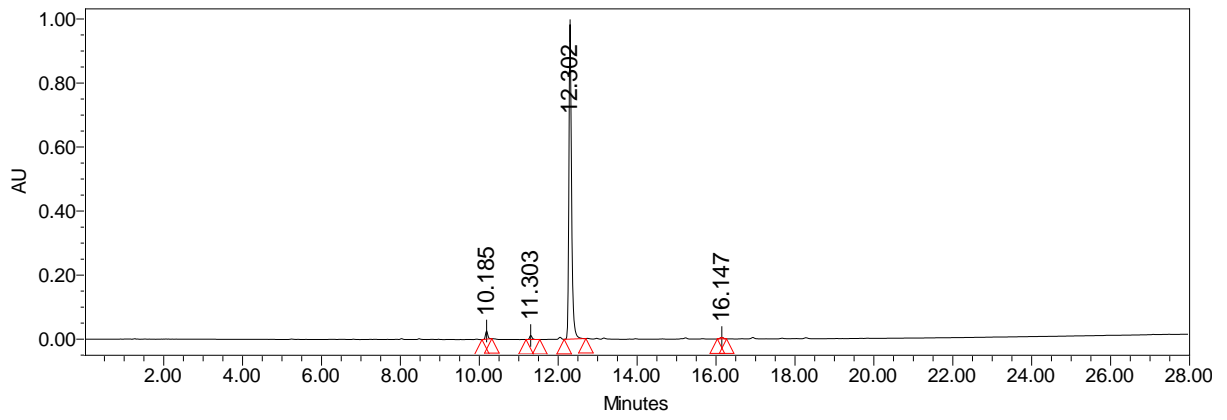

|   | Retention Time | % Area |
|---|----------------|--------|
| 1 | 10.185         | 2.10   |
| 2 | 11.303         | 1.19   |
| 3 | 12.302         | 96.12  |
| 4 | 16.147         | 0.59   |

Sample Name: RYF-775 Sample Location: P1-D-05 Sample Id: RYF-775 Operator: Revital Freedman  
 Data File Name: D:\PE Sciex Data\Projects\OA\_TOF Data\Chorev\Data\RYF-7751-120911-00185.wiff Acq Time: September 12 2011, 04:37:04 PM  
 Method: D:\TOF\_Data\damethods\HRES\_FIA\_2M\_0.2R\_ANM\ANM\efc.xml

One or more scans have failed IRM. Review the data file for details.

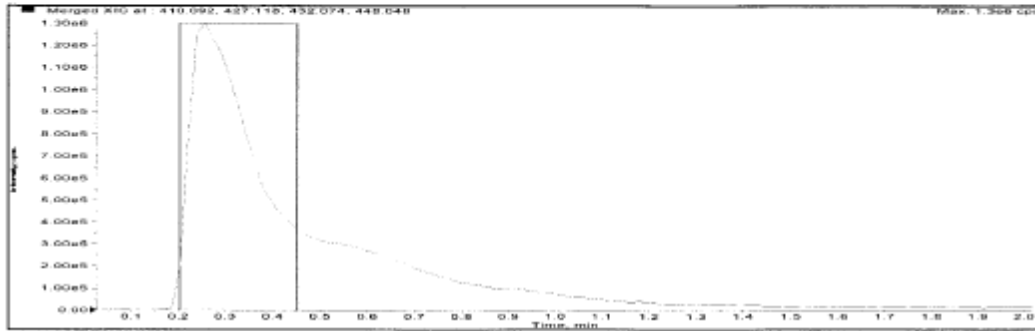

Merged XIC, Period# : 1 Experiment# : 1

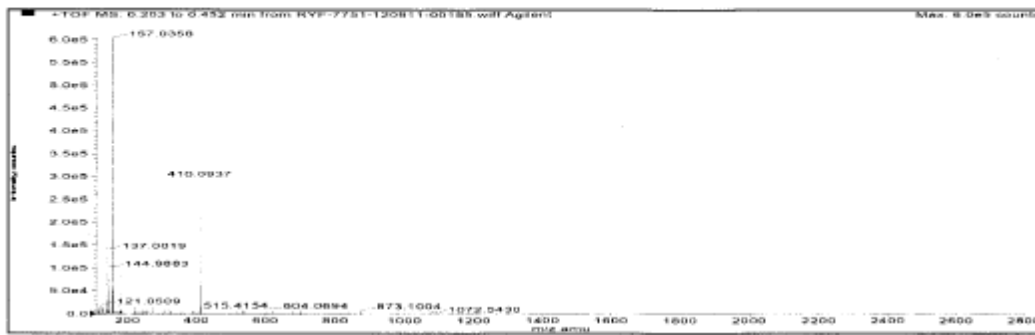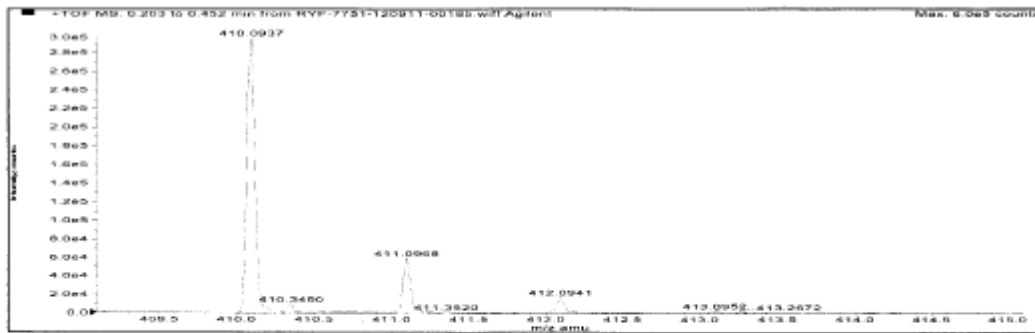

| Formula     | Compound name | Mass      | Peak RT (min) | Peak area  | Description |
|-------------|---------------|-----------|---------------|------------|-------------|
| C19H15N5O4S | --            | 409.09447 | 0.25          | 1.06042 E7 | --          |

| Species            | Abundance (counts) | Ion Mass  | Measured Mass | Error (mDa) | Error (ppm) | Ret. Time Error (min) |
|--------------------|--------------------|-----------|---------------|-------------|-------------|-----------------------|
| [M+H] <sup>+</sup> | 303594.37          | 410.09175 | 410.09373     | 1.97777     | 4.82        | --                    |

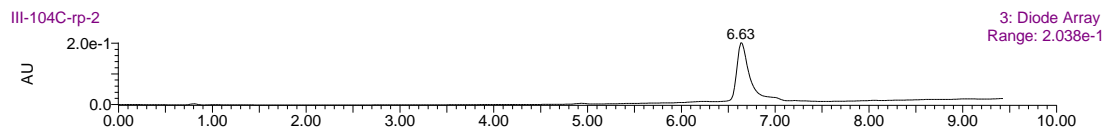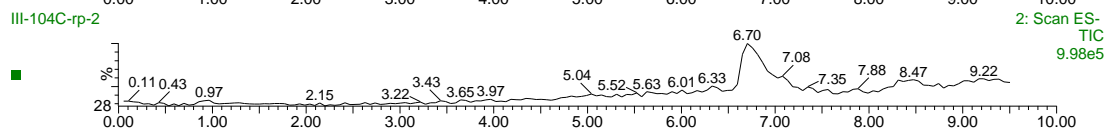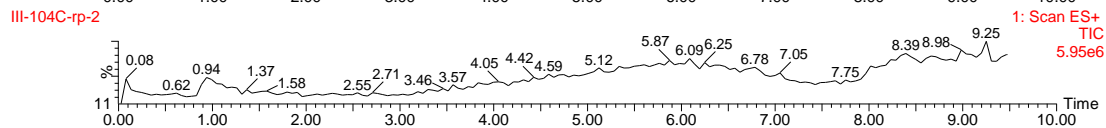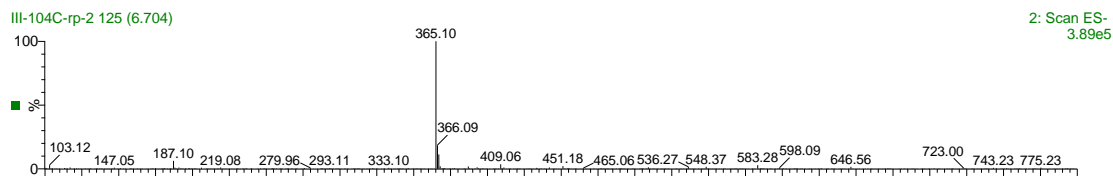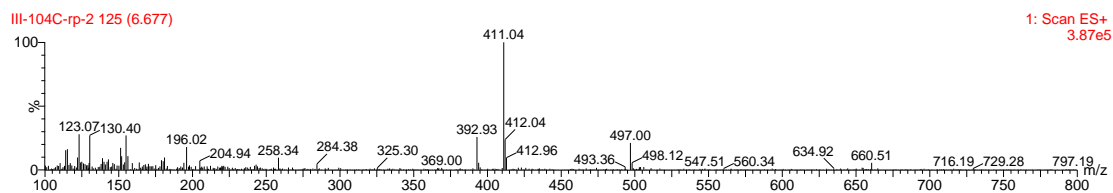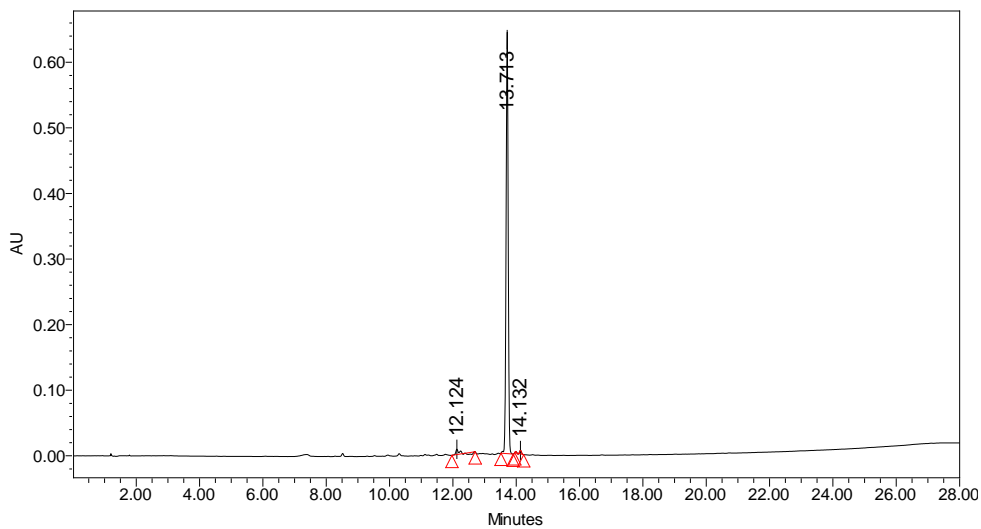

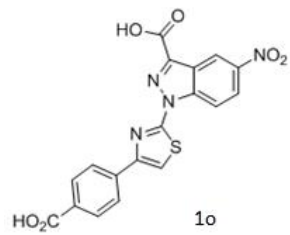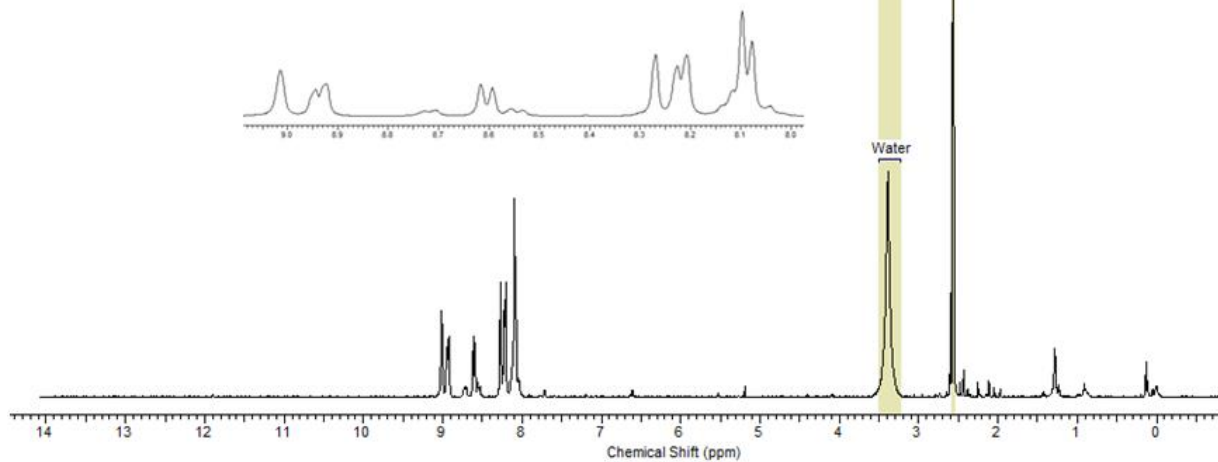

1o

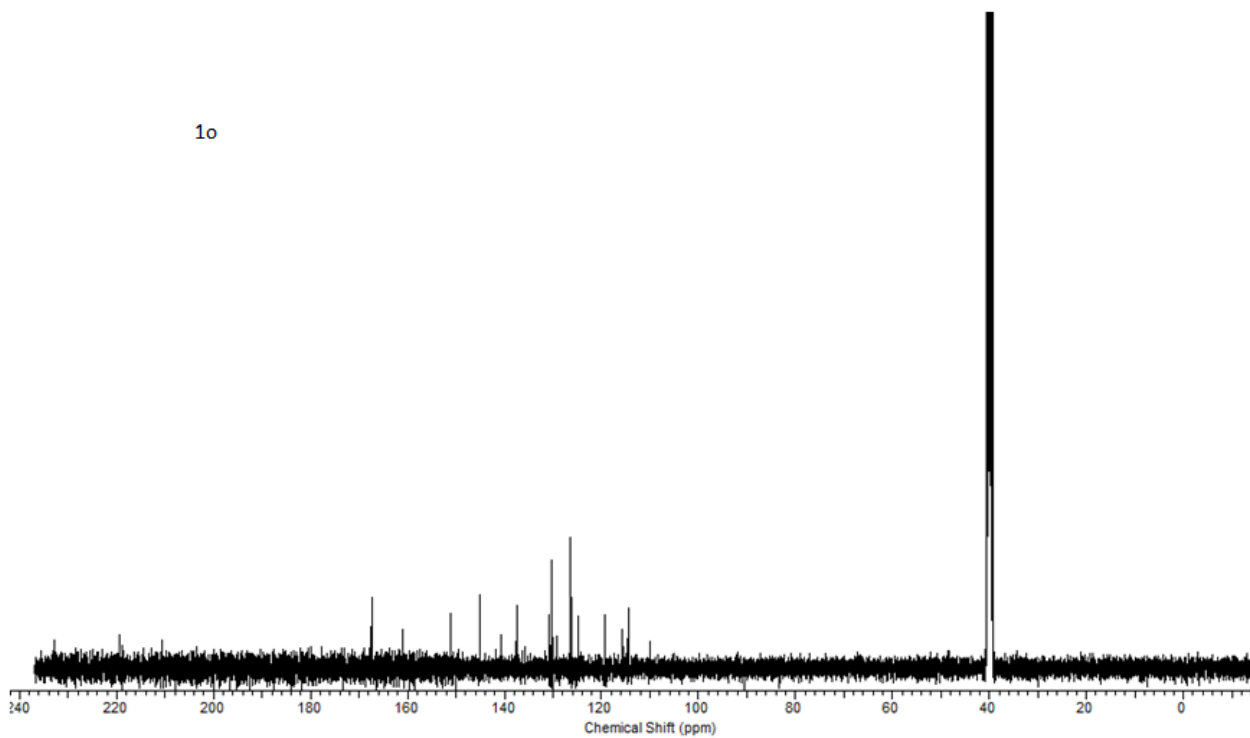



Sample Name: RYF-784 Sample Location: P1-E-01 Sample Id: RYF-784 Operator: Sunia Trauger  
 Data File Name: D:\PE Sciex Data\Projects\DA\_TOF\_Data\SA1\Data\RYF-784-150911-00039.wiff Acq Time: September 15 2011, 09:42:09 AM  
 Method: D:\TOF\_Data\damethods\HRES\_FIA\_2M\_0.2R\_ANM\ANMefc.xml

One or more scans have failed IRM. Review the data file for details.

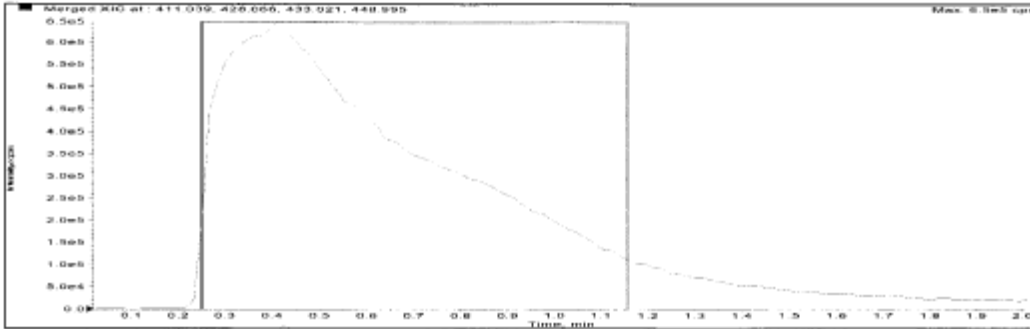

Merged XIC, Period# : 1 Experiment# : 1

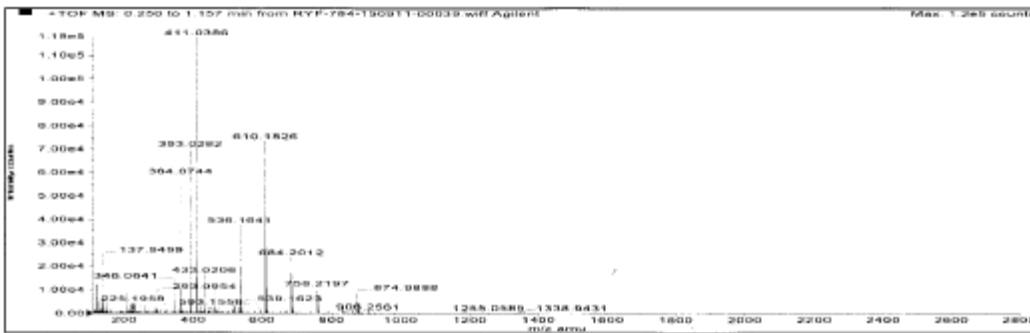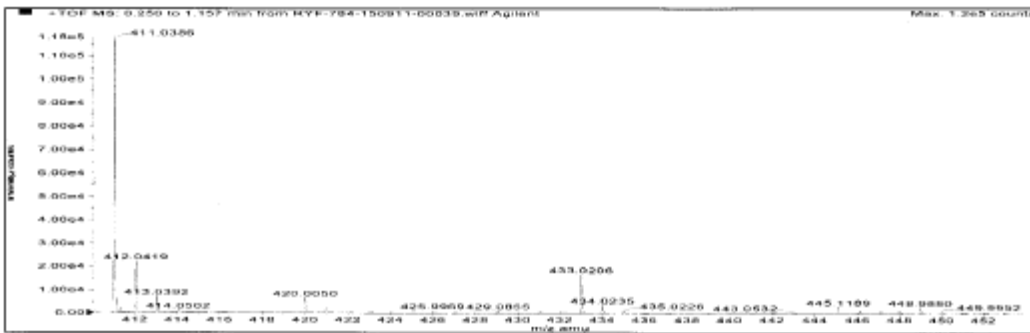

| Formula     | Compound name | Mass      | Peak RT (min) | Peak area  | Description |
|-------------|---------------|-----------|---------------|------------|-------------|
| C18H10N4O5S | --            | 410.03210 | 0.41          | 1.85200 E7 | --          |

| Species             | Abundance (counts) | Ion Mass  | Measured Mass | Error (mDa) | Error (ppm) | Ret. Time Error (min) |
|---------------------|--------------------|-----------|---------------|-------------|-------------|-----------------------|
| [M+H] <sup>+</sup>  | 126581.70          | 411.03938 | 411.03859     | -0.78883    | -1.92       | --                    |
| [M+Na] <sup>+</sup> | 16706.09           | 433.02133 | 433.02063     | -0.69097    | -1.60       | --                    |
| [M+K] <sup>+</sup>  | 2814.23            | 448.99526 | 448.98802     | -7.24082    | -16.13      | --                    |

# 1p

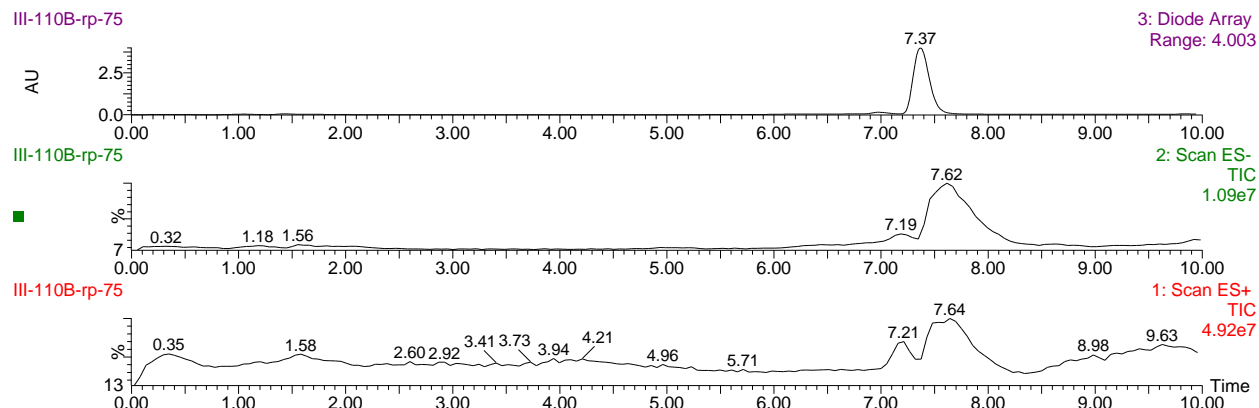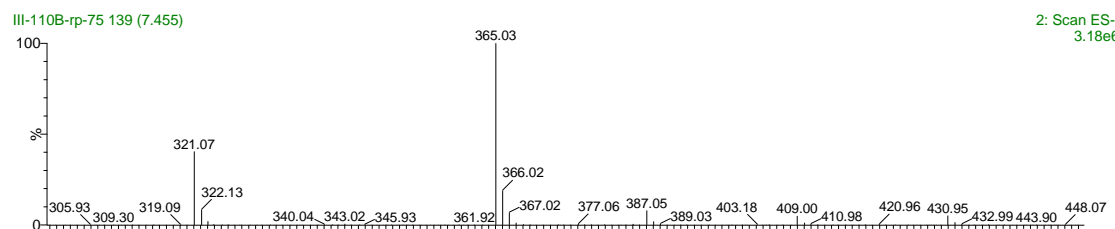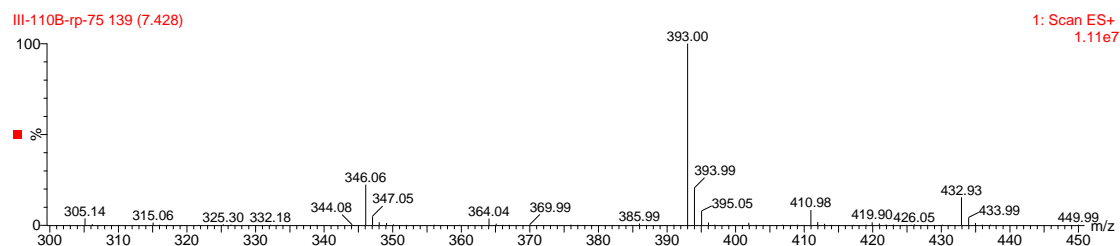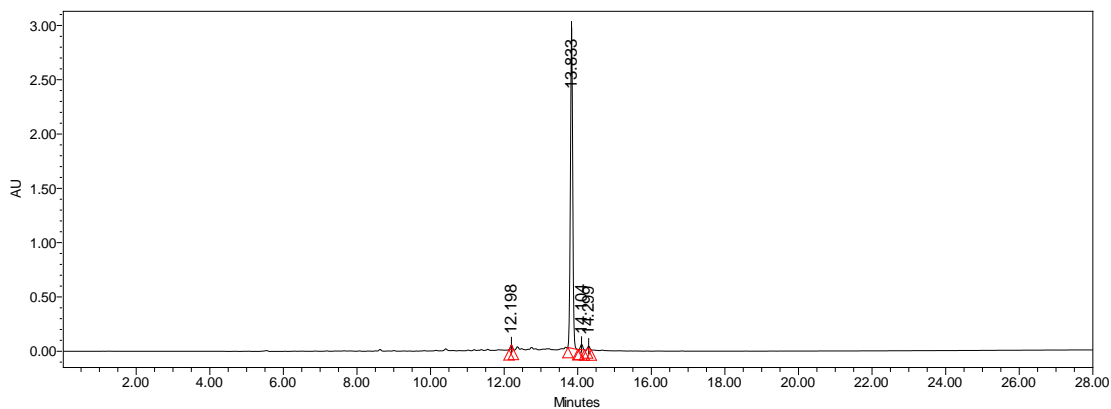

|   | Retention Time | % Area |
|---|----------------|--------|
| 1 | 12.198         | 1.15   |
| 2 | 13.833         | 96.71  |
| 3 | 14.104         | 1.62   |
| 4 | 14.299         | 0.52   |

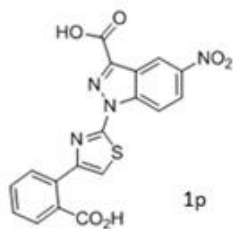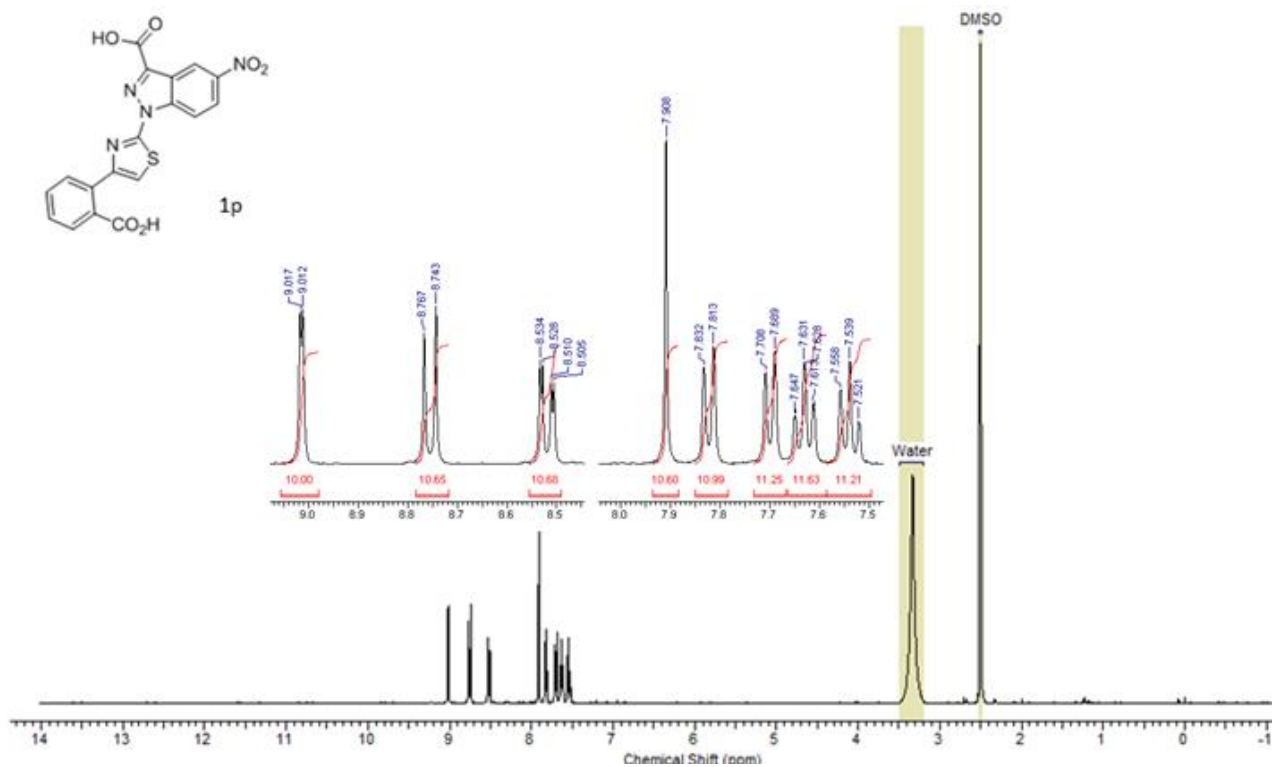

**1p**

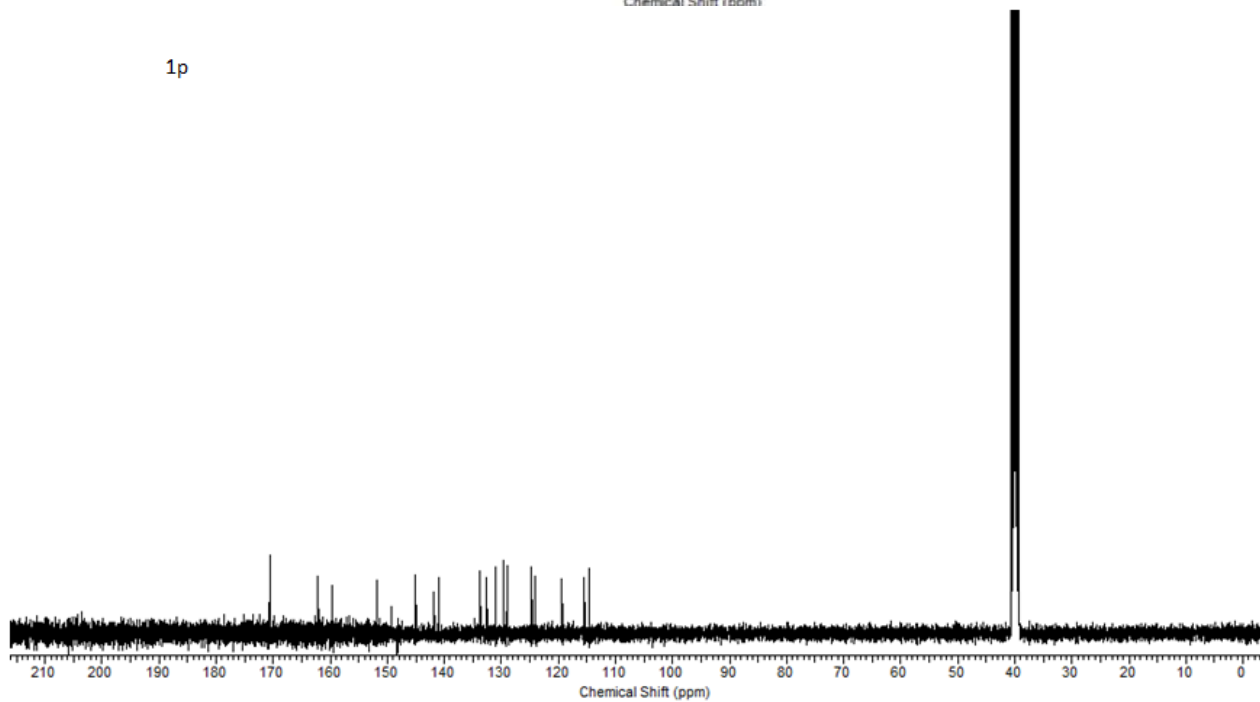

Sample Name: RYF-790C Sample Location: P1-D-08 Sample Id: RYF-790C Operator: Revital Freedman  
 Data File Name: D:\PE\_Sciex\_Data\Projects\LOA\_TOF\_Data\Chorev\Data\RYF-790C1-120911-00188.wiff Acq Time: September 12 2011, 04:51:24 PM  
 Method: D:\TOF\_Data\methods\MRES\_FIA\_2M\_0.2R\_ANM.ANM\etc.xml

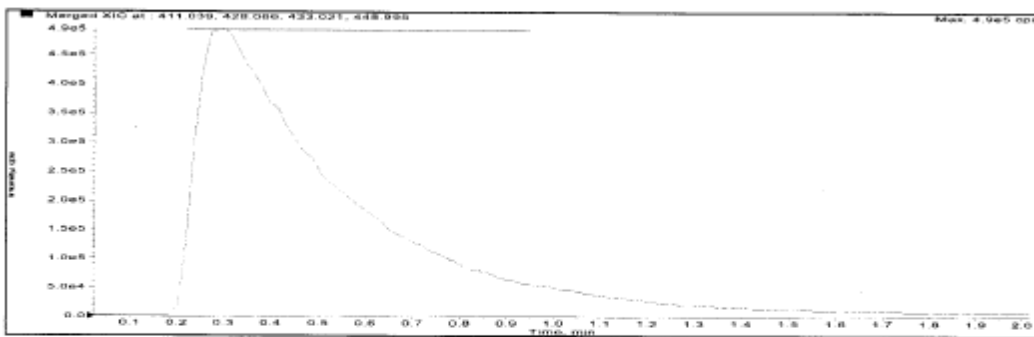

Merged XIC, Period# : 1 Experiment# : 1

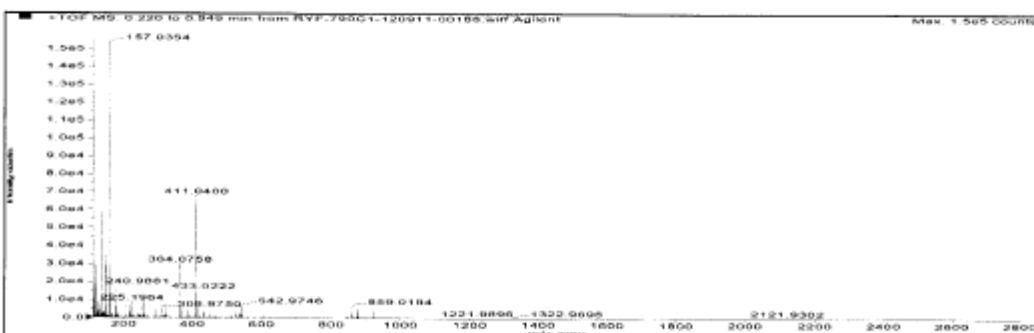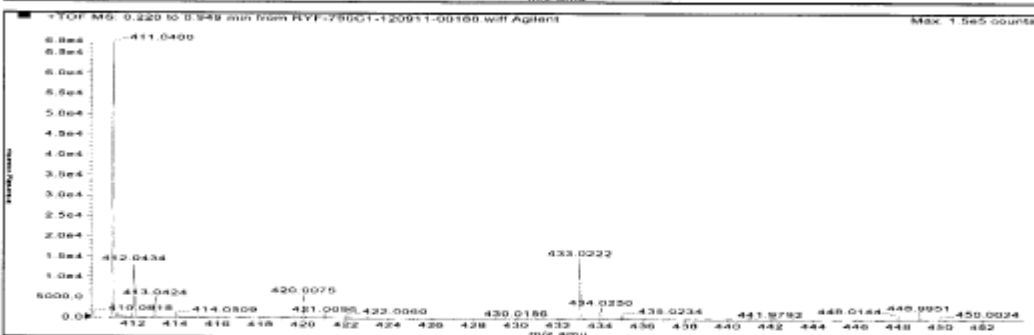

| Formula     | Compound name | Mass      | Peak RT (min) | Peak area  | Description |
|-------------|---------------|-----------|---------------|------------|-------------|
| C18H10N4O6S | --            | 410.03210 | 0.30          | 9.46268 E6 | --          |

| Species             | Abundance (counts) | Ion Mass  | Measured Mass | Error (mDa) | Error (ppm) | Ret. Time Error (min) |
|---------------------|--------------------|-----------|---------------|-------------|-------------|-----------------------|
| [M+H] <sup>+</sup>  | 72403.97           | 411.03938 | 411.03998     | 0.59842     | 1.46        | --                    |
| [M+Na] <sup>+</sup> | 15215.10           | 433.02133 | 433.02222     | 0.89686     | 2.07        | --                    |
| [M+K] <sup>+</sup>  | 2057.05            | 448.99526 | 448.99510     | -0.16201    | -0.36       | --                    |

1q

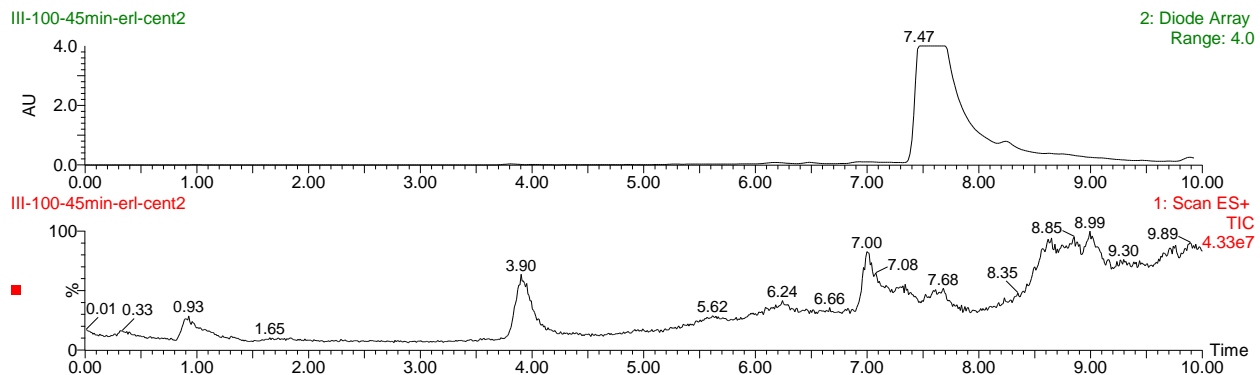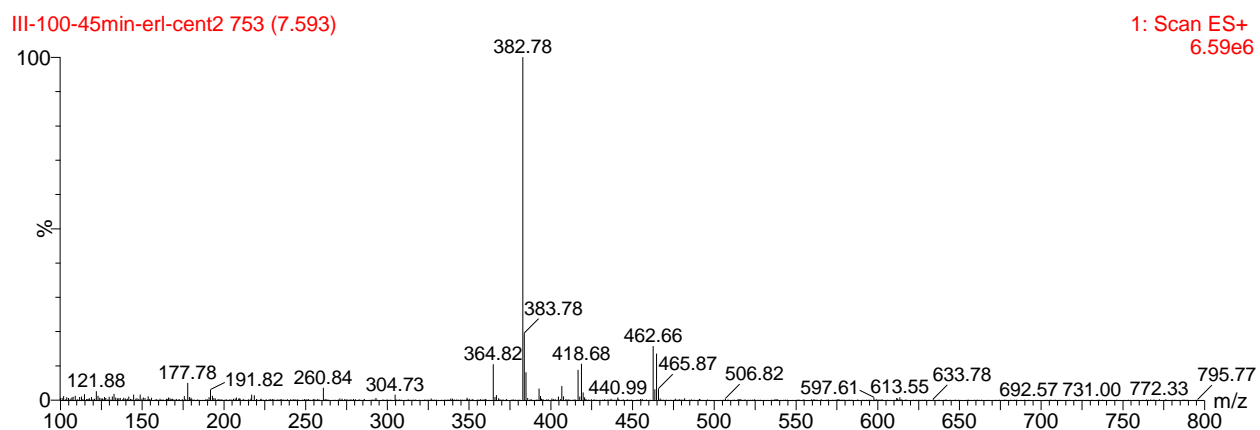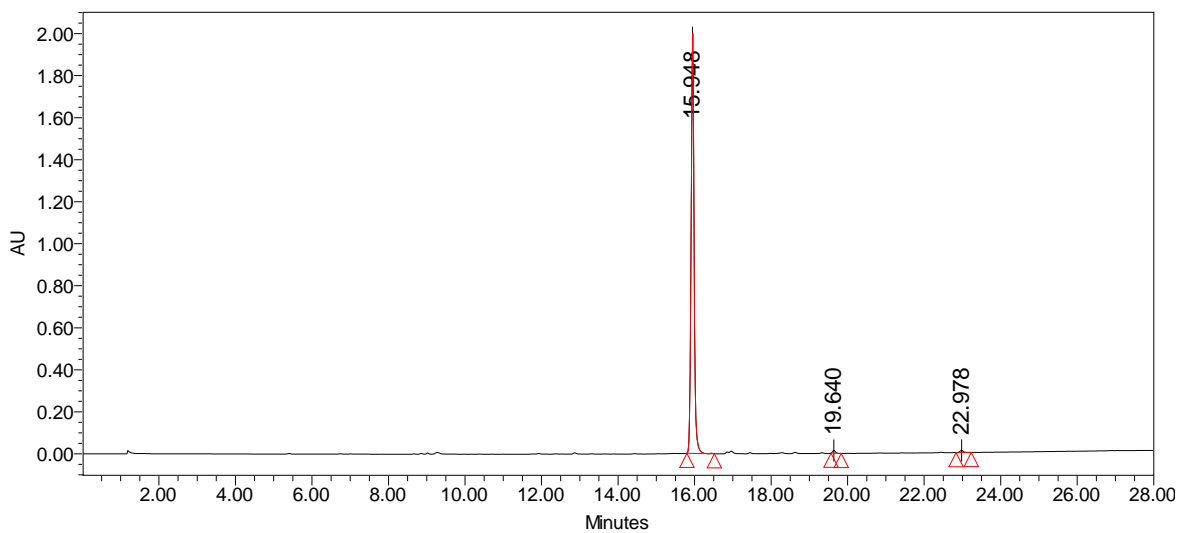

| Retention Time | Area  |
|----------------|-------|
| 15.948         | 98.79 |
| 19.640         | 0.62  |
| 22.978         | 0.59  |



|               |                      |            |              |                        |
|---------------|----------------------|------------|--------------|------------------------|
| Sample Name   | RYP780               | Position   | P1-F09       | Instrument Name        |
| User Name     | Revital Freedman     | Inj Vol    | 0.2          | IRM Calibration Status |
| Data Filename | RYP7801-110712-00340 | ACQ Method | OA_FIA_NEG.M | Comment                |
| Acquired Time | 7/11/2012 4:48:10 PM |            |              |                        |

| Compound Label         | RT    | Mass    | Abund | Formula         | Tot Mass |
|------------------------|-------|---------|-------|-----------------|----------|
| Cpd 1: C17 H10 N4 O5 S | 0.378 | 382.036 | 16172 | C17 H10 N4 O5 S | 382.0372 |

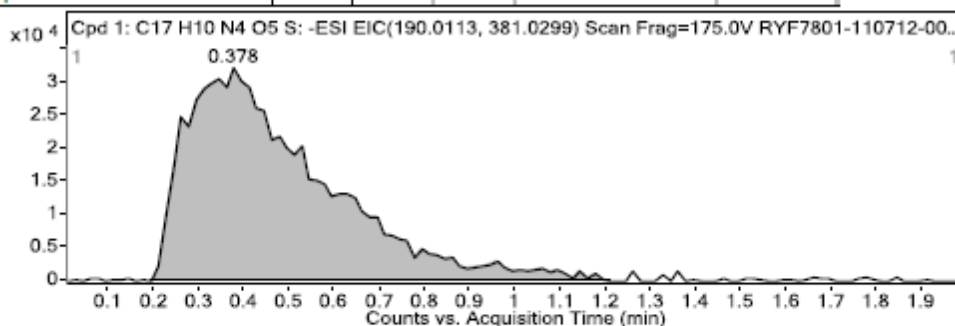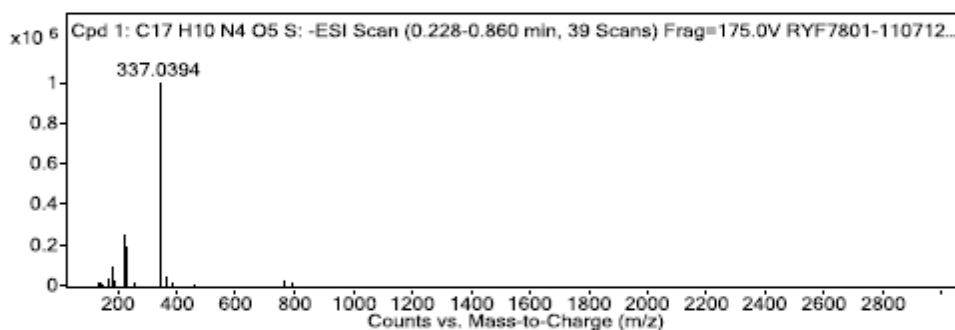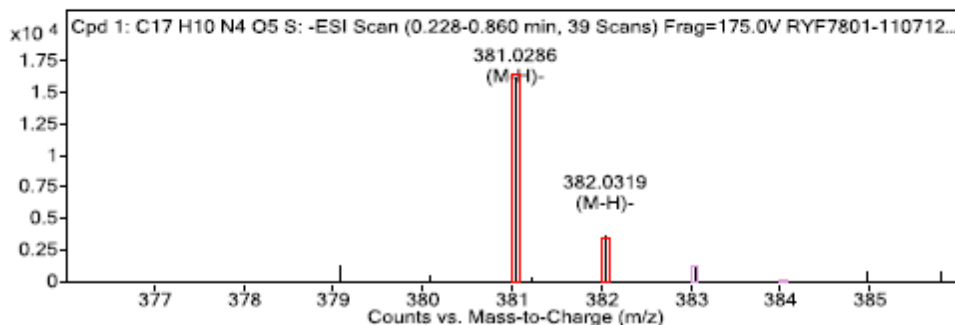

| m/z      | Calc m/z | Diff(ppm) | z | Abund      | Formula    | Ion    |
|----------|----------|-----------|---|------------|------------|--------|
| 337.0394 |          |           |   | 1005457.31 |            |        |
| 381.0286 | 381.0299 | -3.47     | 1 | 16171.86   | C17H9N4O5S | (M-H)- |
| 382.0319 | 382.0327 | -2.1      | 1 | 3683.72    | C17H9N4O5S | (M-H)- |

1r

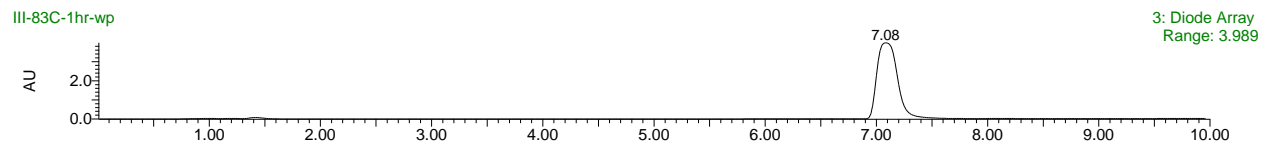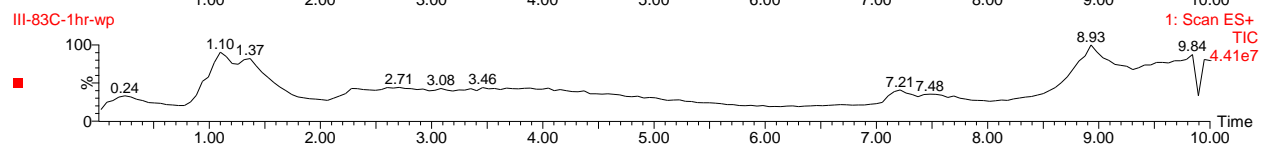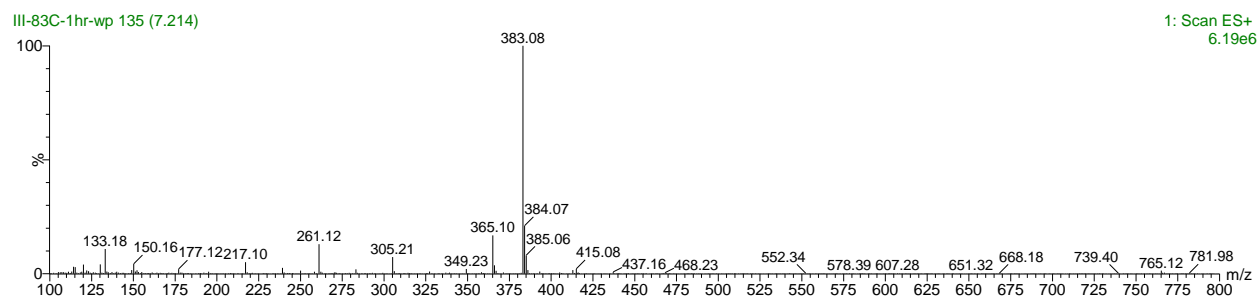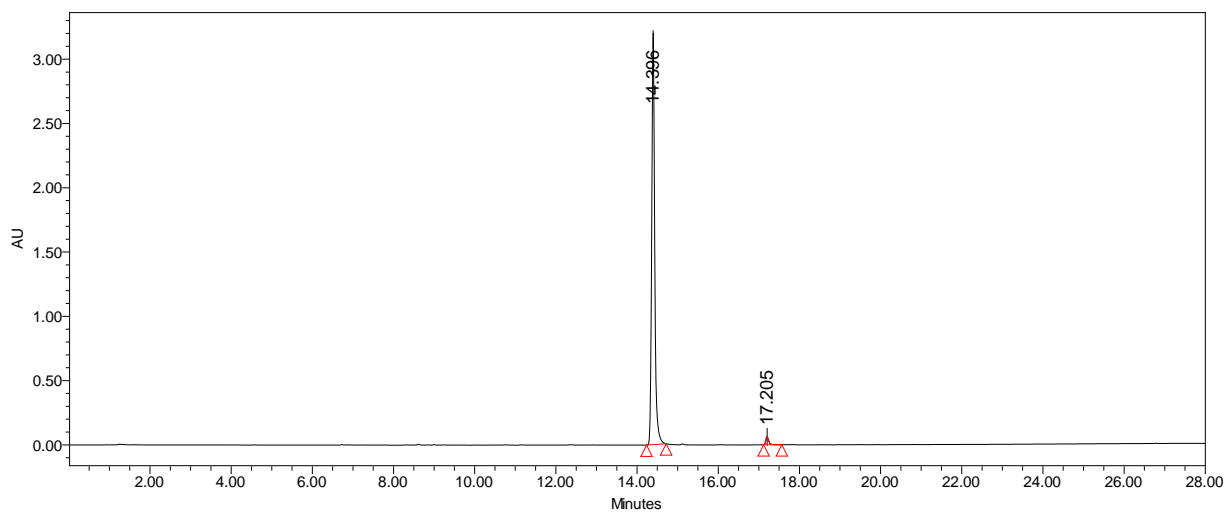

|   | Retention Time | % Area |
|---|----------------|--------|
| 1 | 14.396         | 98.09  |
| 2 | 17.205         | 1.91   |



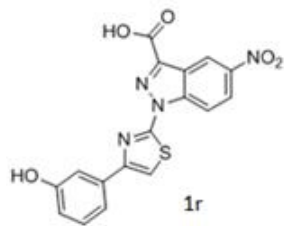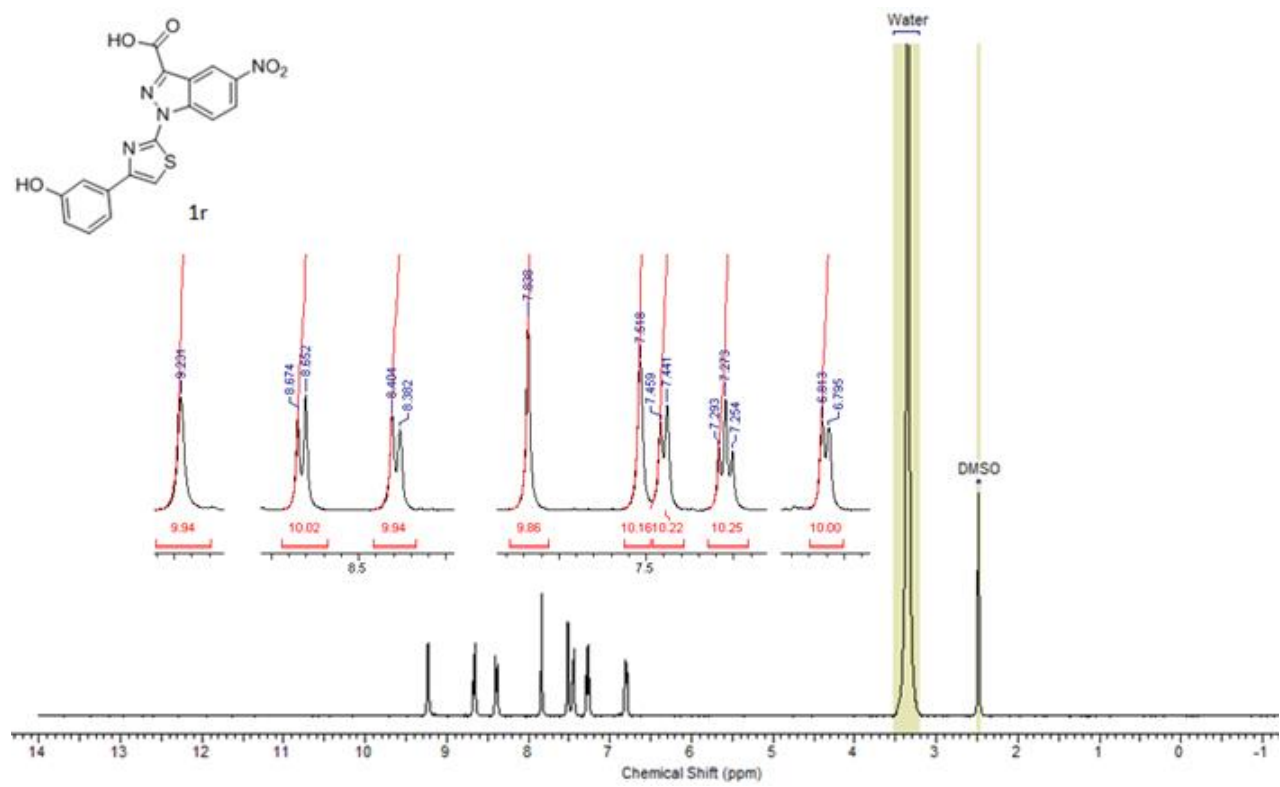

**1r**

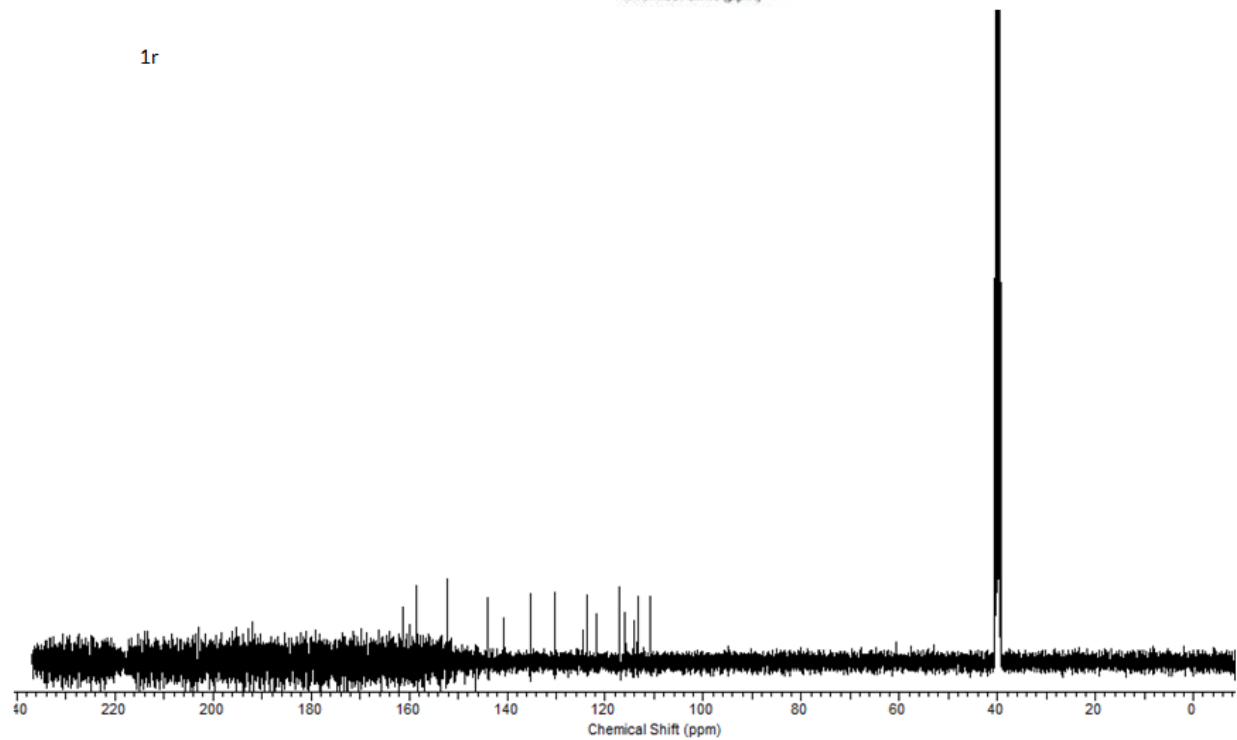

Sample Name: RYF-763 Sample Location: P1-C-01 Sample Id: RYF-763 Operator: Sunia Trauger  
 Data File Name: D:\PE Sciex Data\Projects\IOA\_TOF Data\SA\TOF Data\RYF-763-130911-00234.wiff Acq Time: September 13 2011, 04:10:24 PM  
 Method: D:\TOF\_Data\methods\HRES\_FIA\_2M\_0.2R\_ANM.ANMIefc.xml

One or more scans have failed IRM. Review the data file for details.

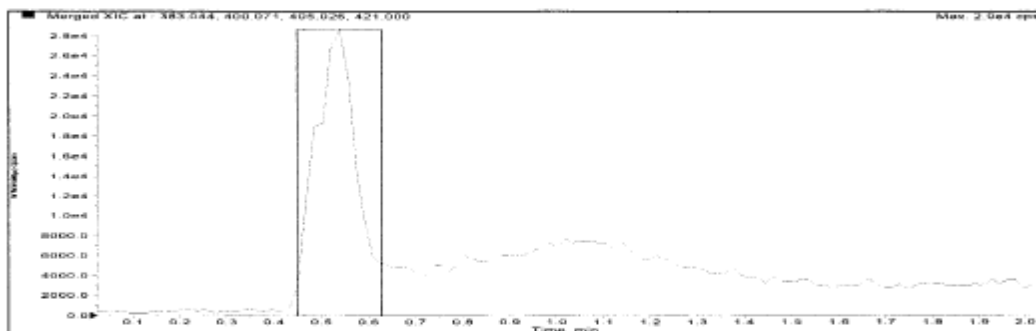

Merged XIC, Period#: 1 Experiment#: 1

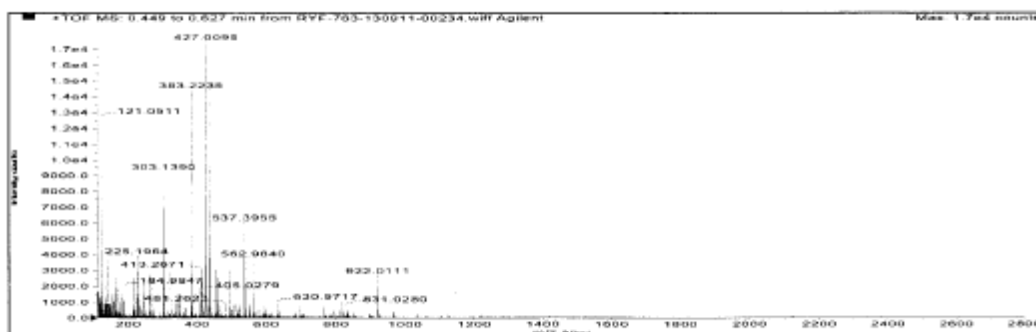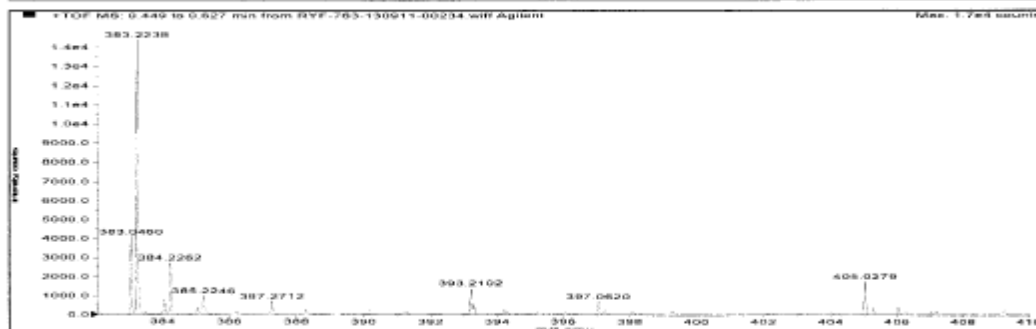

| Formula     | Compound name | Mass      | Peak RT (min) | Peak area  | Description |
|-------------|---------------|-----------|---------------|------------|-------------|
| C17H10N4O5S | --            | 382.03719 | 0.53          | 1.64724 E5 | --          |

| Species             | Abundance (counts) | Ion Mass  | Measured Mass | Error (mDa) | Error (ppm) | Ret. Time Error (min) |
|---------------------|--------------------|-----------|---------------|-------------|-------------|-----------------------|
| [M+H] <sup>+</sup>  | 4185.32            | 383.04447 | 383.04599     | 1.52767     | 3.99        | --                    |
| [M+Na] <sup>+</sup> | 1830.84            | 405.02641 | 405.02794     | 1.53221     | 3.78        | --                    |

1s

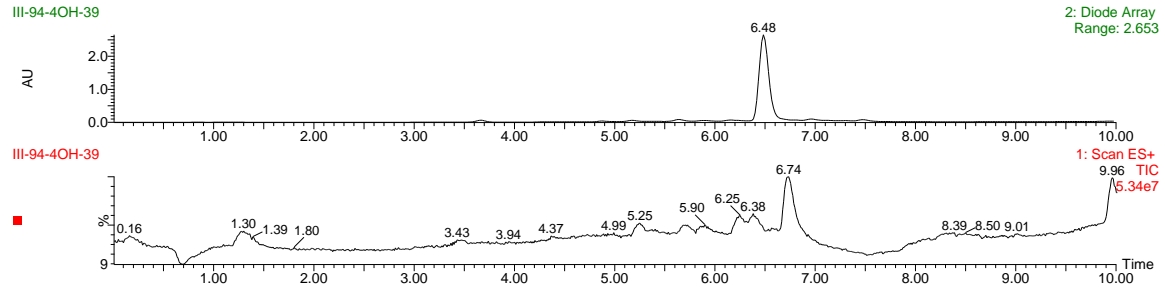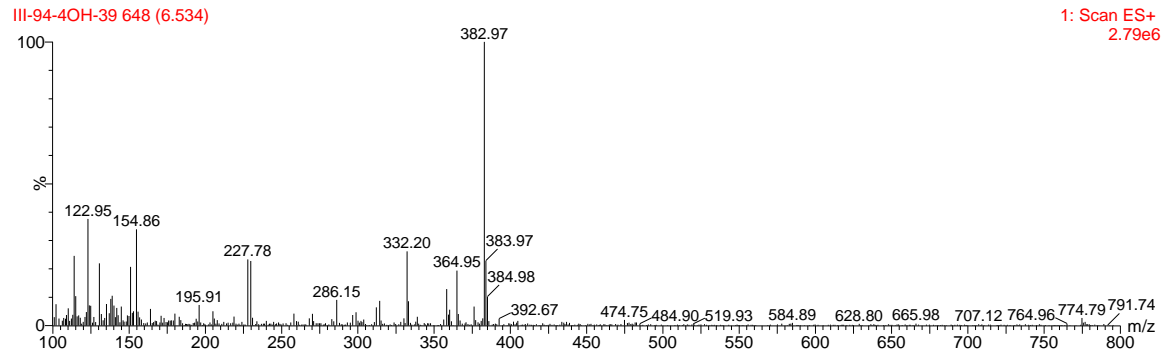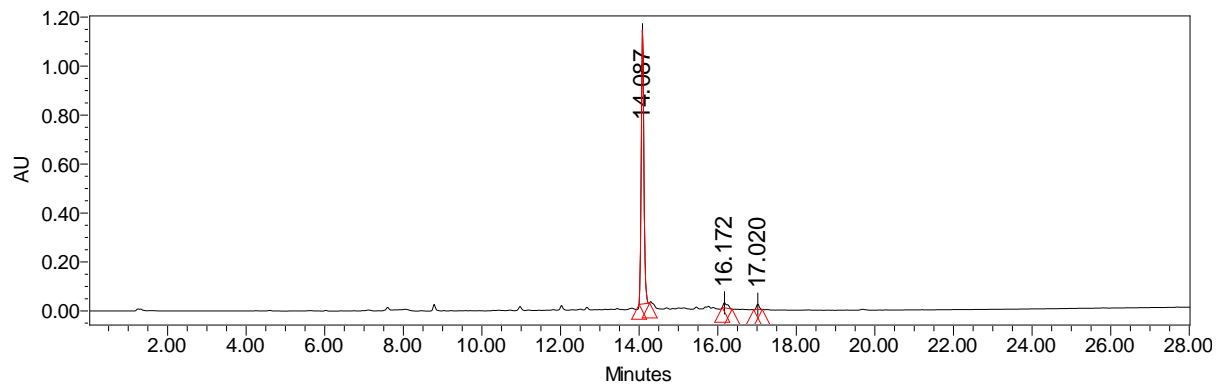

|   | Retention Time | % Area |
|---|----------------|--------|
| 1 | 14.087         | 95.07  |
| 2 | 16.172         | 2.94   |
| 3 | 17.020         | 1.99   |

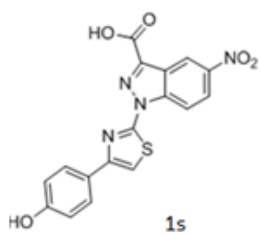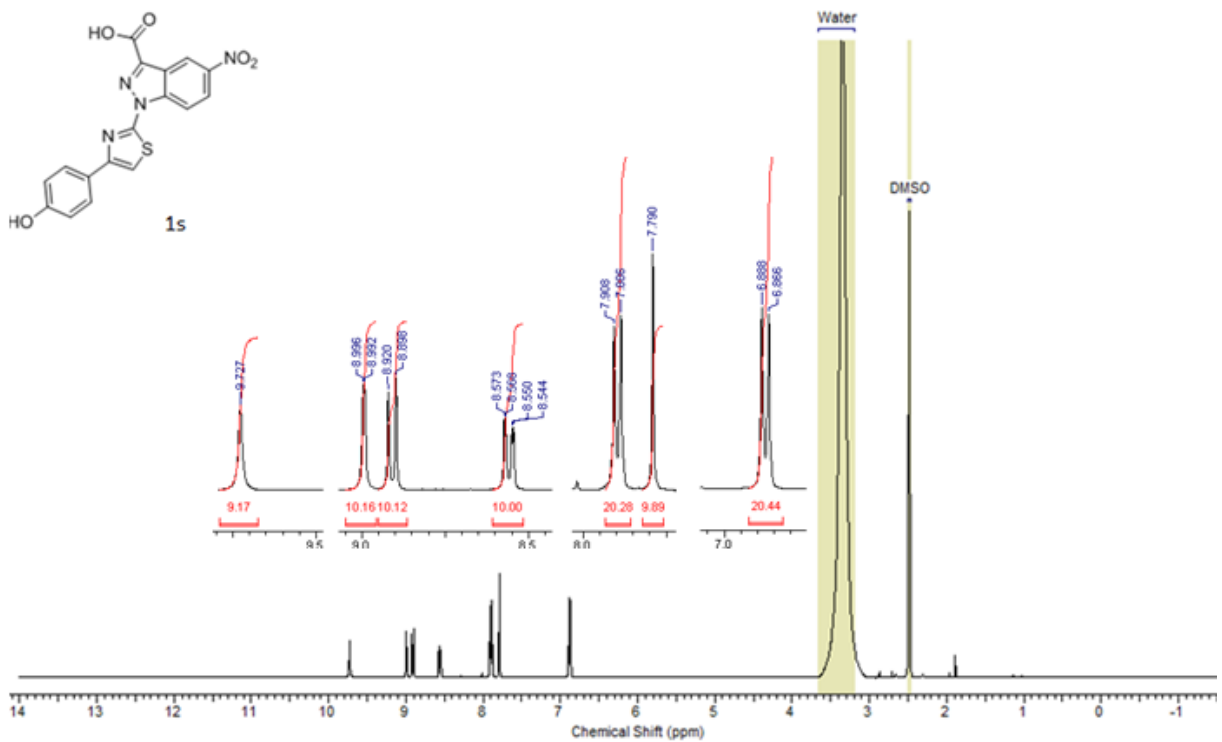

**1s**

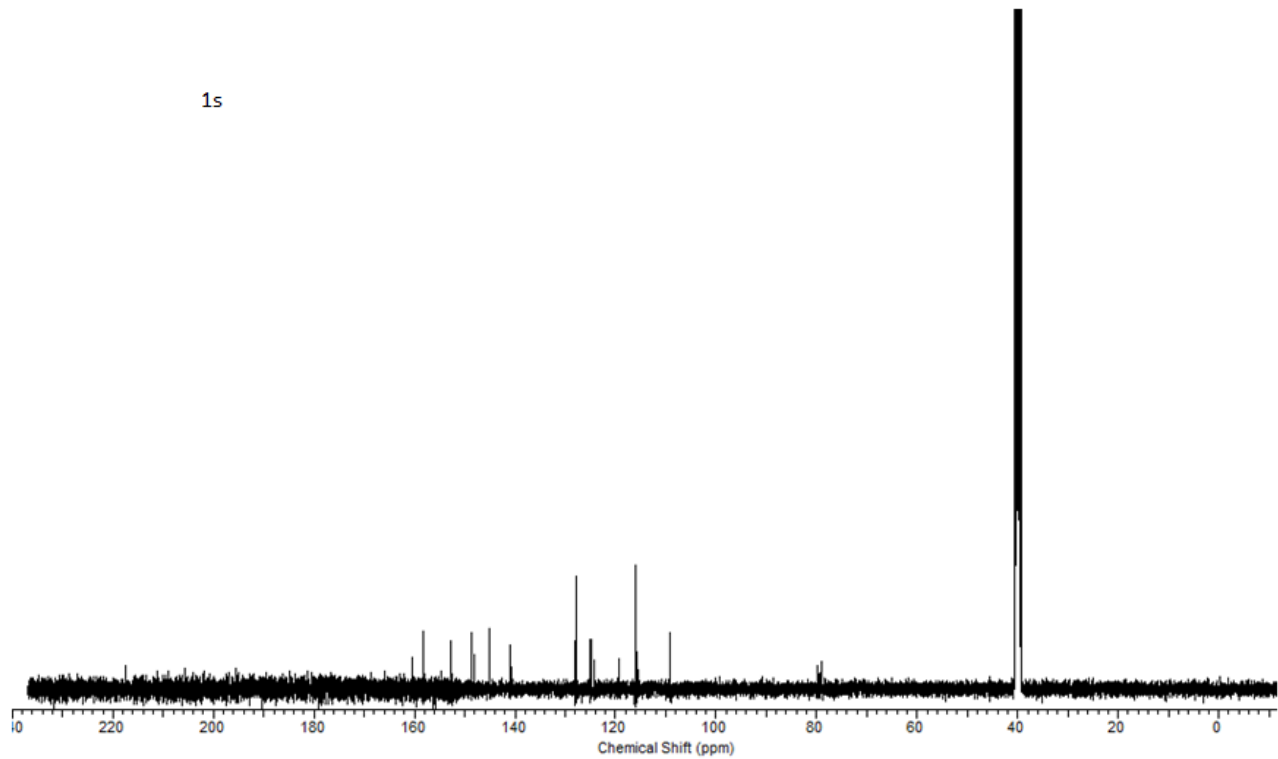

Sample Name: RYF-774 Sample Location: P1-C-04 Sample Id: RYF-774 Operator: Sunia Trauger  
 Data File Name: D:\PE\_Sciex\_Data\Projects\IOA\_TOF\_Data\SAT\Data\RYF-774-130911-00237.wiff Acq Time: September 13 2011, 04:24:42 PM  
 Method: D:\TOF\_Data\amethods\HRES\_FIA\_2M\_0.2R\_ANM.ANM\etc.xml

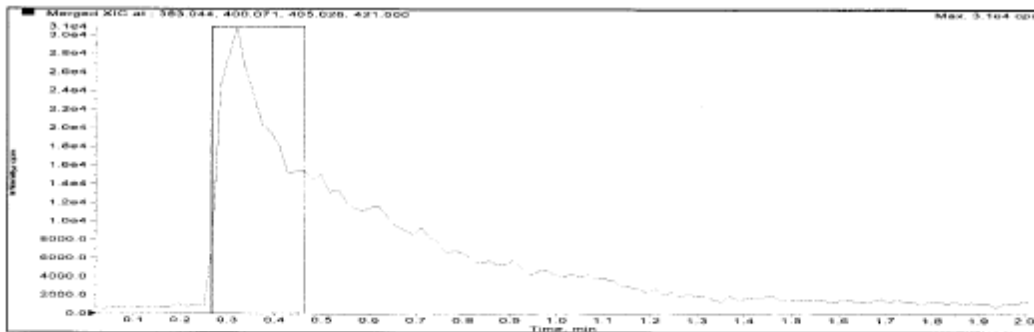

Merged XIC, Period# : 1 Experiment# : 1

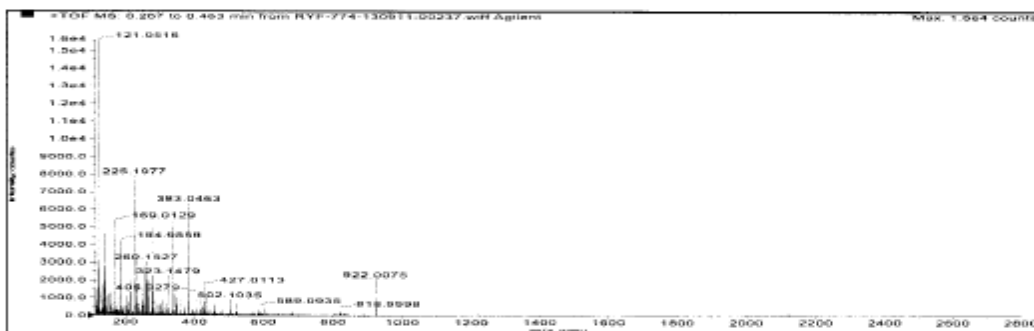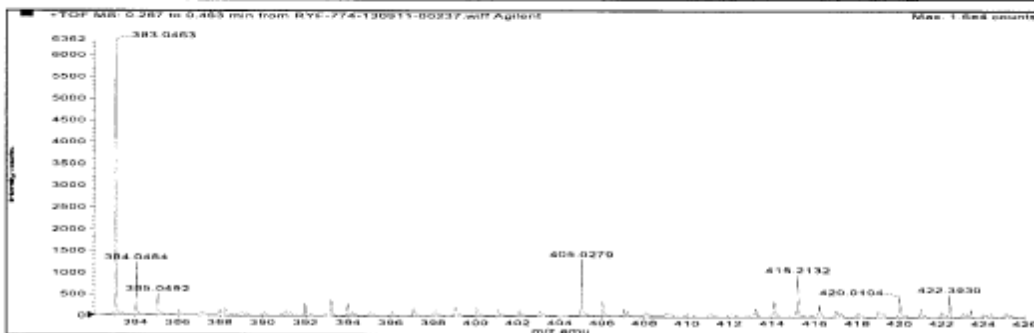

| Formula     | Compound name | Mass      | Peak RT (min) | Peak area  | Description |
|-------------|---------------|-----------|---------------|------------|-------------|
| C17H10N4O5S | --            | 382.03719 | 0.32          | 1.62315 E5 | --          |

| Species             | Abundance (counts) | Ion Mass  | Measured Mass | Error (mDa) | Error (ppm) | Ret. Time Error (min) |
|---------------------|--------------------|-----------|---------------|-------------|-------------|-----------------------|
| [M+H] <sup>+</sup>  | 6431.77            | 383.04447 | 383.04629     | 1.82398     | 4.76        | --                    |
| [M+Na] <sup>+</sup> | 1362.17            | 405.02641 | 405.02794     | 1.53075     | 3.78        | --                    |

1t

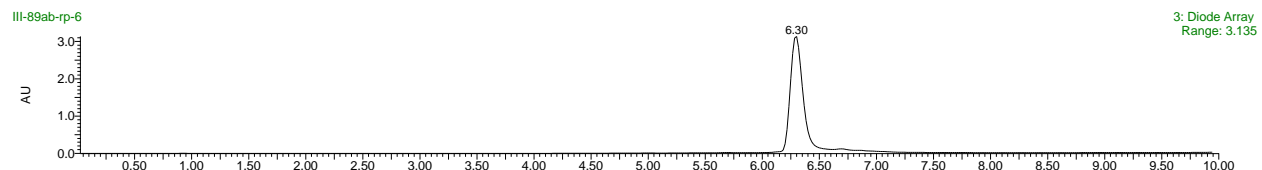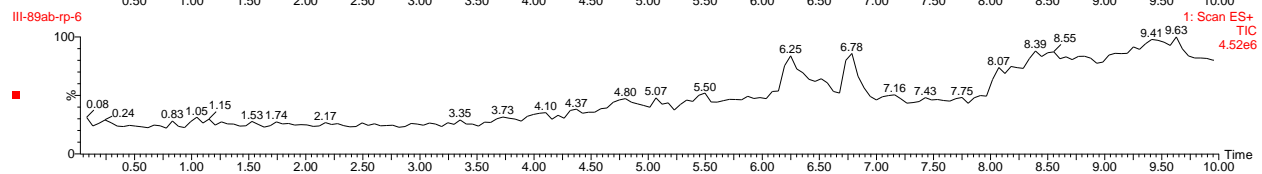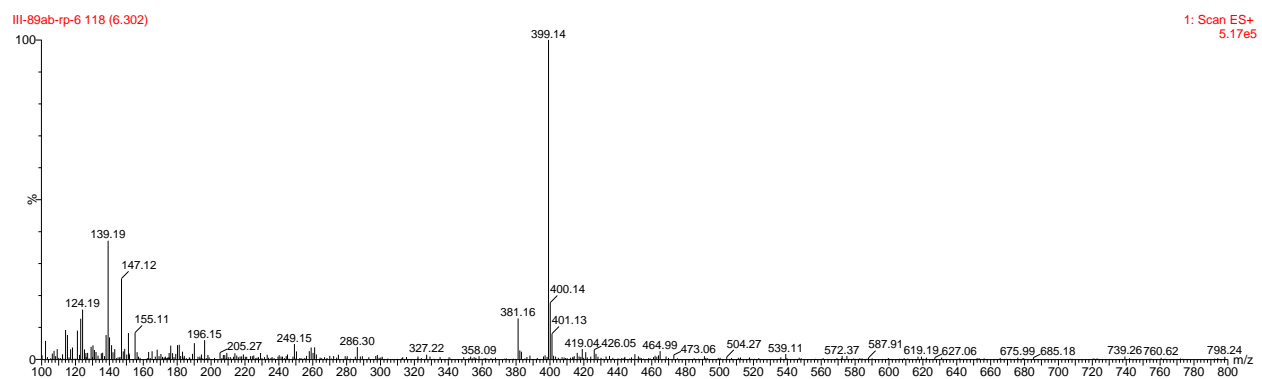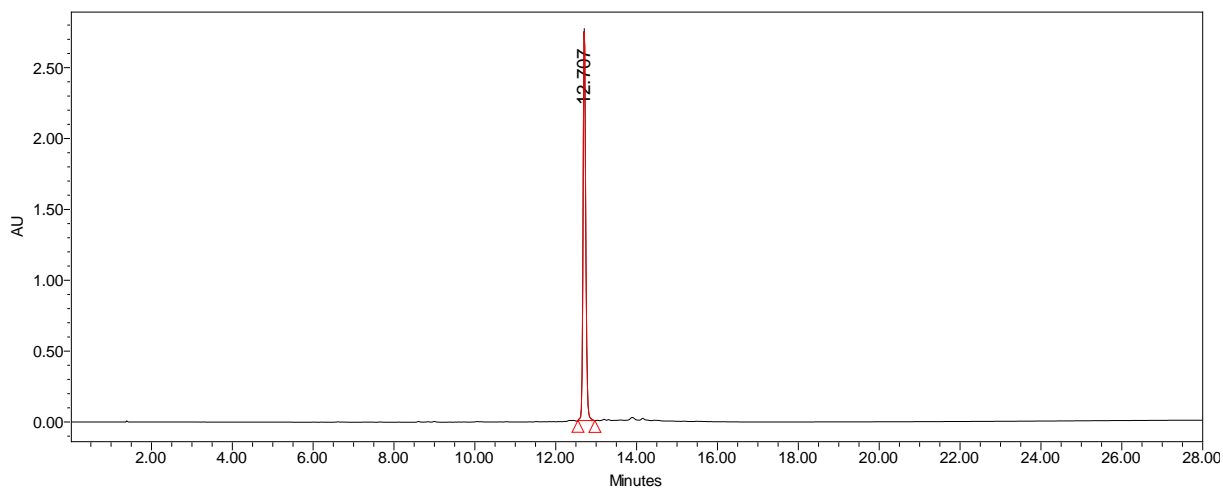

|   | Retention Time | % Area |
|---|----------------|--------|
| 1 | 12.707         | 100.00 |

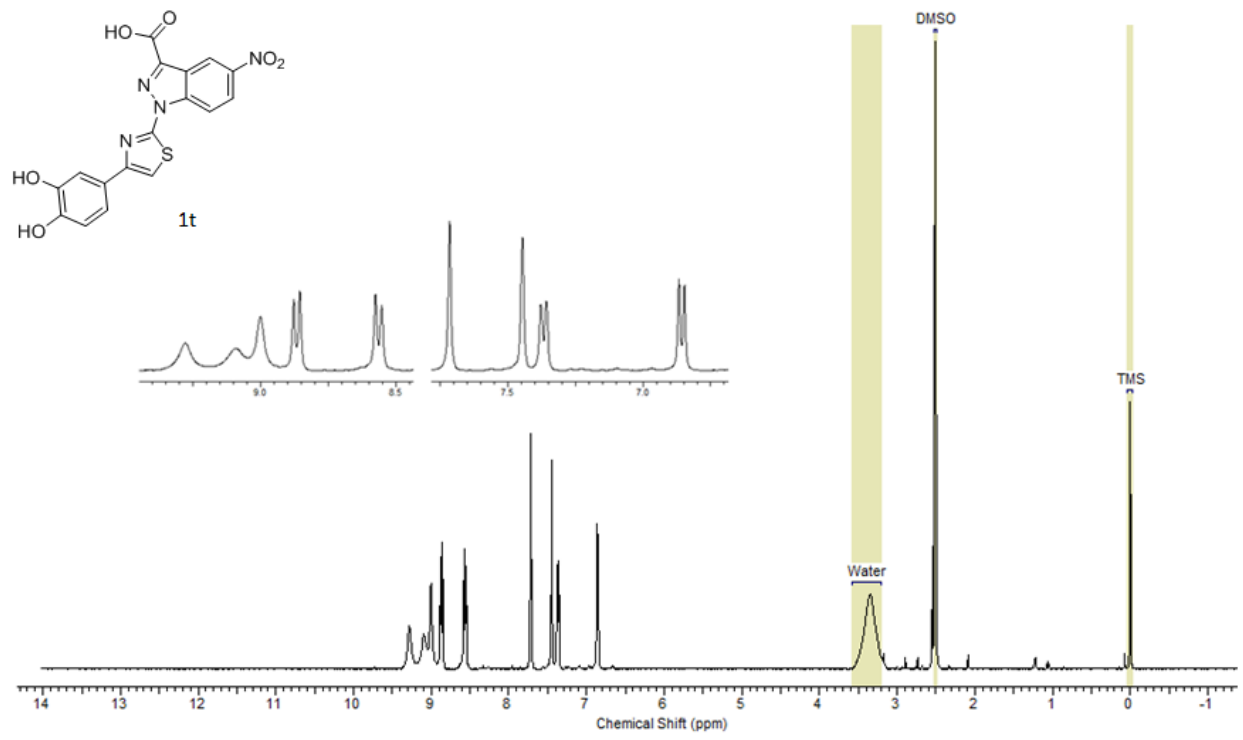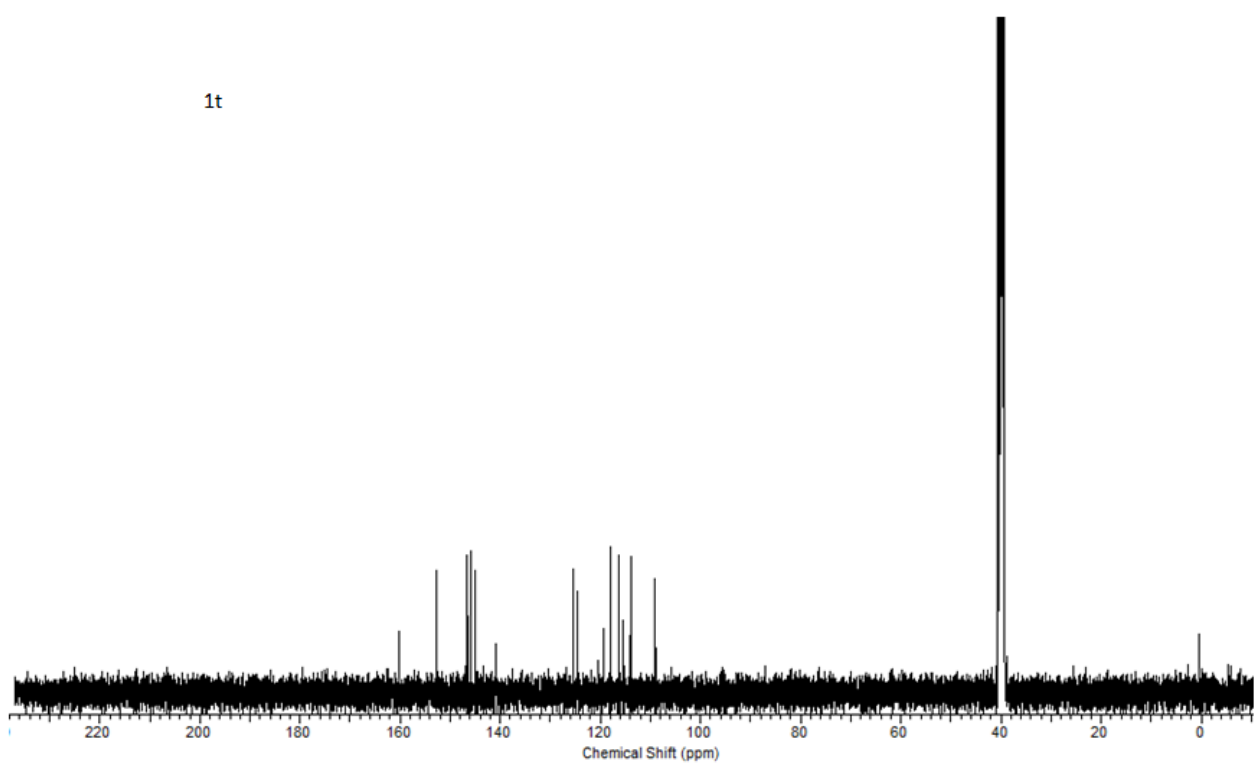

|               |                      |            |              |                        |
|---------------|----------------------|------------|--------------|------------------------|
| Sample Name   | RYF-769              | Position   | P1-A04       | Instrument Name        |
| User Name     | Revital Freedman     | Inj Vol    | 1            | IRM Calibration Status |
| Data Filename | RYF-7691-120712-0038 | ACQ Method | OA_FIA_POS.M | Comment                |
| Acquired Time | 7/12/2012 3:22:14 PM |            |              |                        |

| Compound Label         | RT    | Mass    | Abund  | Formula         | Tot Mass |
|------------------------|-------|---------|--------|-----------------|----------|
| Cpd 1: C17 H10 N4 O6 S | 0.259 | 398.033 | 266311 | C17 H10 N4 O6 S | 398.0321 |

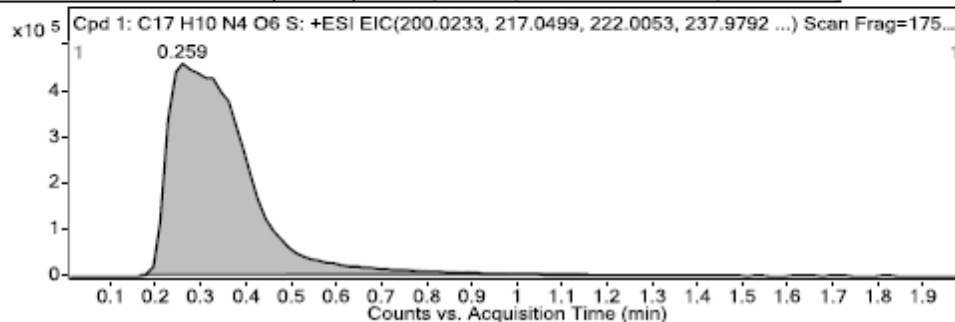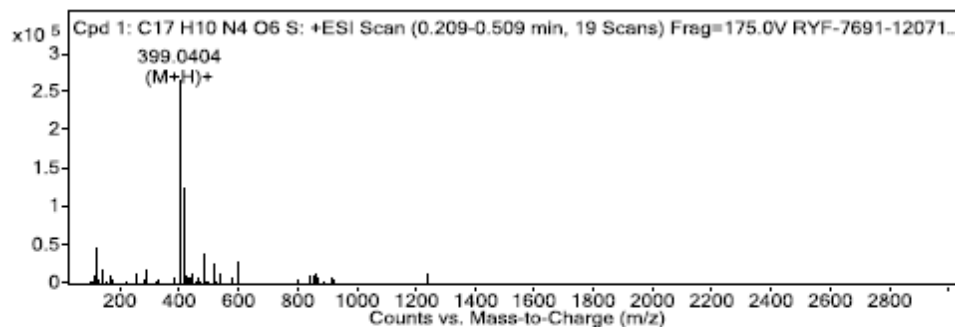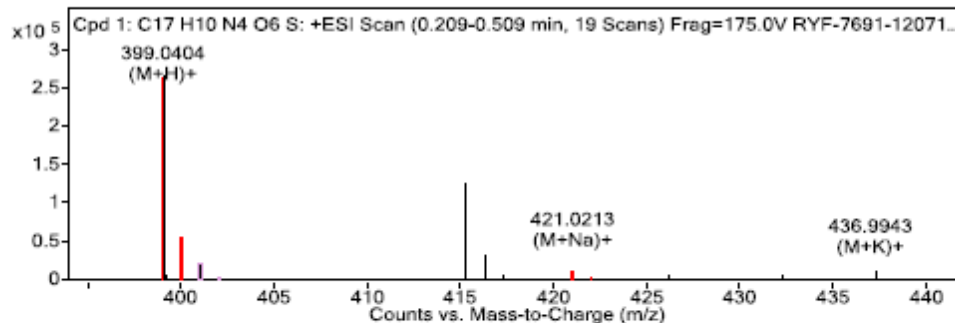

| m/z      | Calc m/z | Diff(ppm) | z | Abund     | Formula       | Ion      |
|----------|----------|-----------|---|-----------|---------------|----------|
| 399.0404 | 399.0394 | 2.44      | 1 | 266311.31 | C17H11N4O6S   | (M+H)+   |
| 400.0426 | 400.0422 | 1.15      | 1 | 51685.96  | C17H11N4O6S   | (M+H)+   |
| 416.0686 | 416.0659 | 6.53      | 1 | 81.6      | C17H14N5O6S   | (M+NH4)+ |
| 421.0213 | 421.0213 | -0.05     | 1 | 8934.41   | C17H10N4NaO6S | (M+Na)+  |
| 422.0237 | 422.0241 | -1        | 1 | 2133.24   | C17H10N4NaO6S | (M+Na)+  |
| 436.9943 | 436.9953 | -2.27     | 1 | 121.47    | C17H10KN4O6S  | (M+K)+   |



# 1u

III-1274C106RP2-25

3: Diode Array  
Range: 1.899

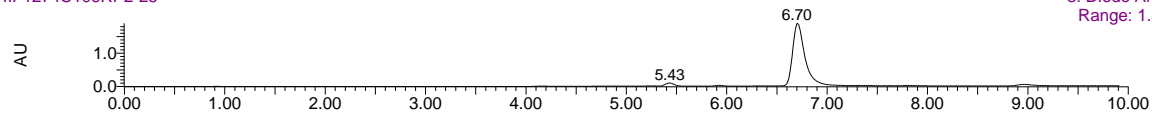

III-1274C106RP2-25

2: Scan ES-  
TIC  
2.01e6

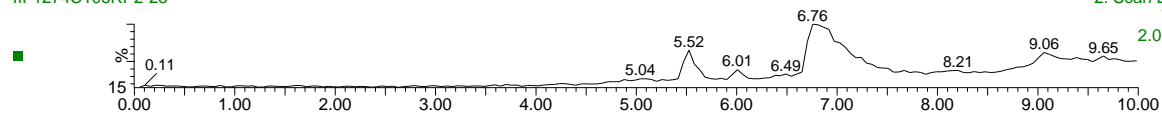

III-1274C106RP2-25

1: Scan ES+  
TIC  
1.40e7

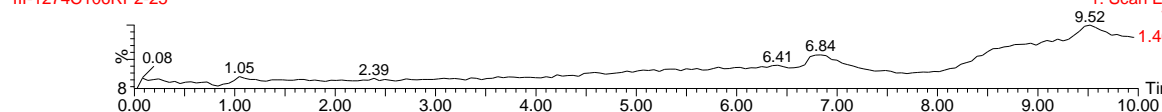

III-1274C106RP2-25 127 (6.811)

2: Scan ES-  
6.72e5

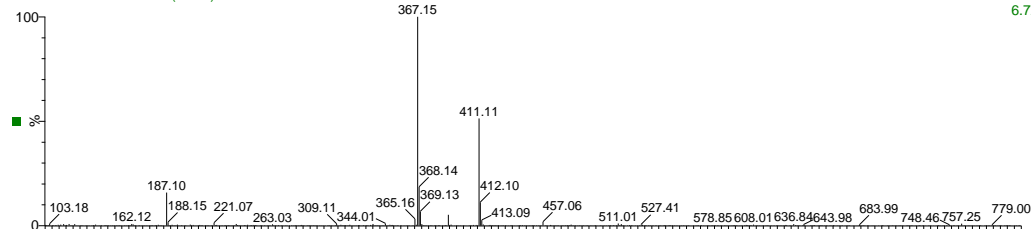

III-1274C106RP2-25 127 (6.784)

1: Scan ES+  
2.13e6

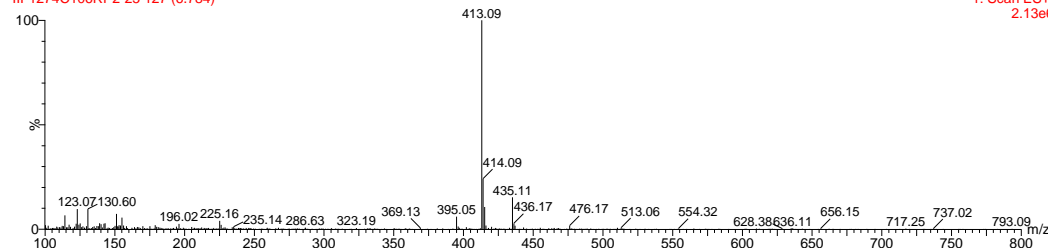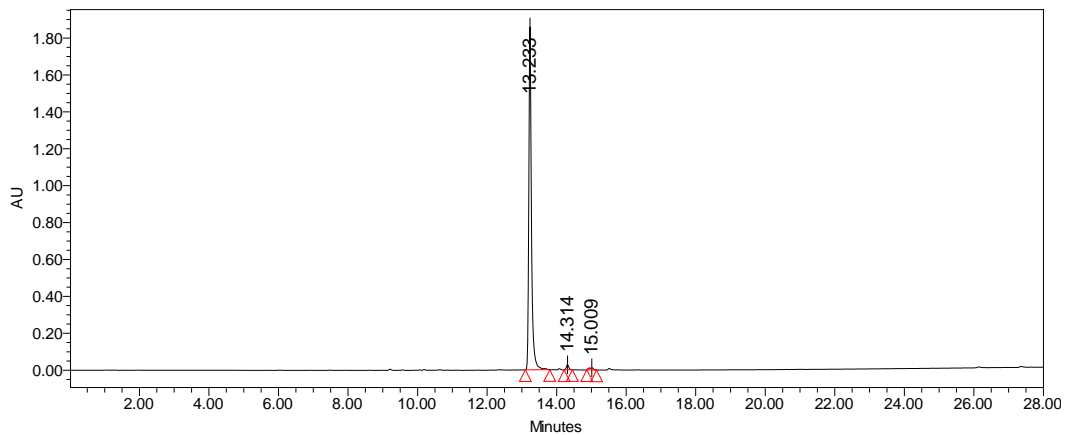

|   | Retention Time | % Area |
|---|----------------|--------|
| 1 | 13.233         | 97.63  |
| 2 | 14.314         | 1.39   |
| 3 | 15.009         | 0.99   |

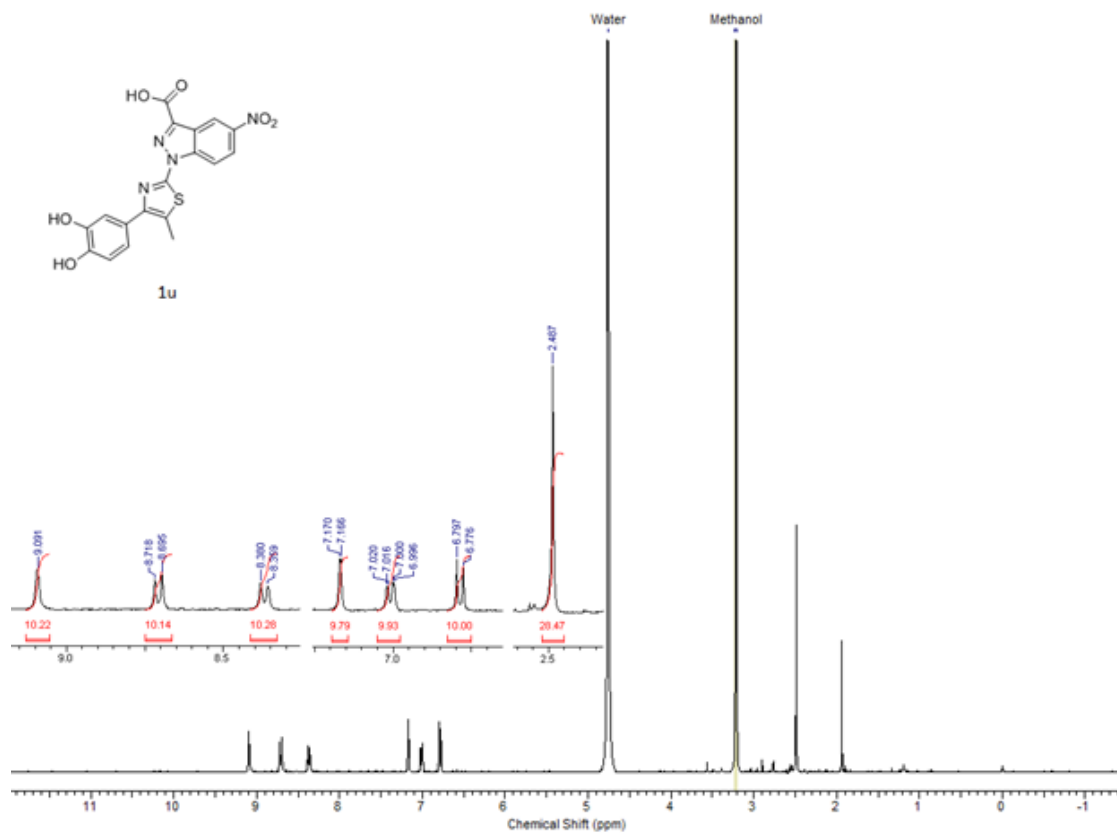

Recrystallized from acetic acid. Peak shows on spectrum.

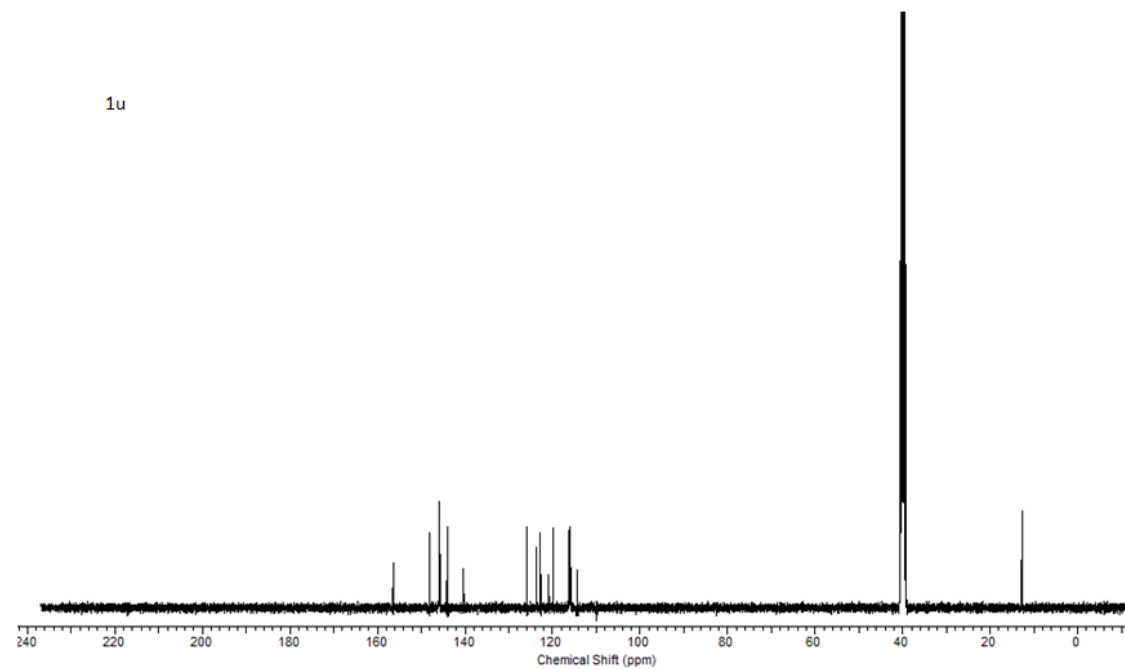

Sample Name: RYF-807 Sample Location: P1-D-07 Sample Id: RYF-807 Operator: Revital Freedman  
 Data File Name: D:\PE Scislex Data\Projects\QA\_TOF Data\Chorev\Data\RYF-8071-120911-00187.wiff Acq Time: September 12 2011, 04:46:40 PM  
 Method: D:\TOF\_Data\damethods\HRES\_FIA\_2M\_0.2R\_ANM\ANM\efc.xml

One or more scans have failed IRM. Review the data file for details.

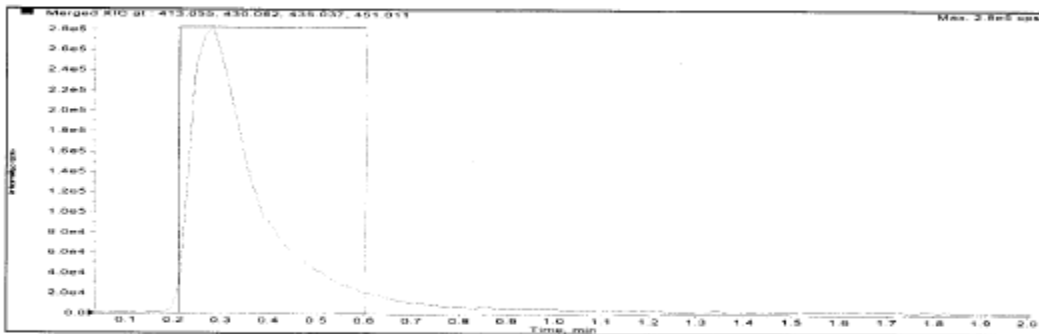

Merged XIC, Period#: 1 Experiment#: 1

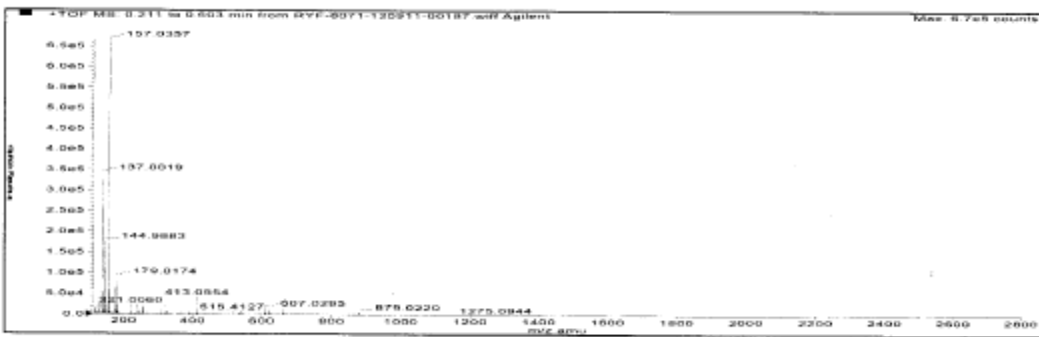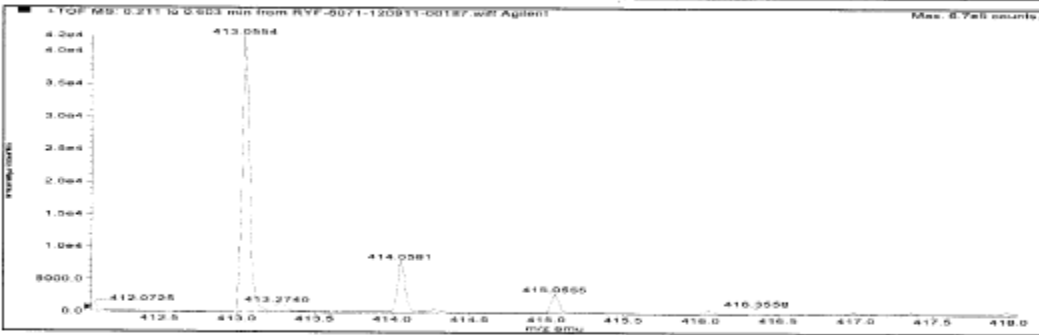

| Formula     | Compound name | Mass     | Peak RT (min) | Peak area  | Description |
|-------------|---------------|----------|---------------|------------|-------------|
| C18H12N4O6S | --            | 412.0476 | 0.28          | 2.71304 E5 | --          |

| Species            | Abundance (counts) | Ion Mass  | Measured Mass | Error (mDa) | Error (ppm) | Ret. Time Error (min) |
|--------------------|--------------------|-----------|---------------|-------------|-------------|-----------------------|
| [M+H] <sup>+</sup> | 43215.38           | 413.05503 | 413.05543     | 0.40349     | 0.98        | --                    |

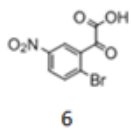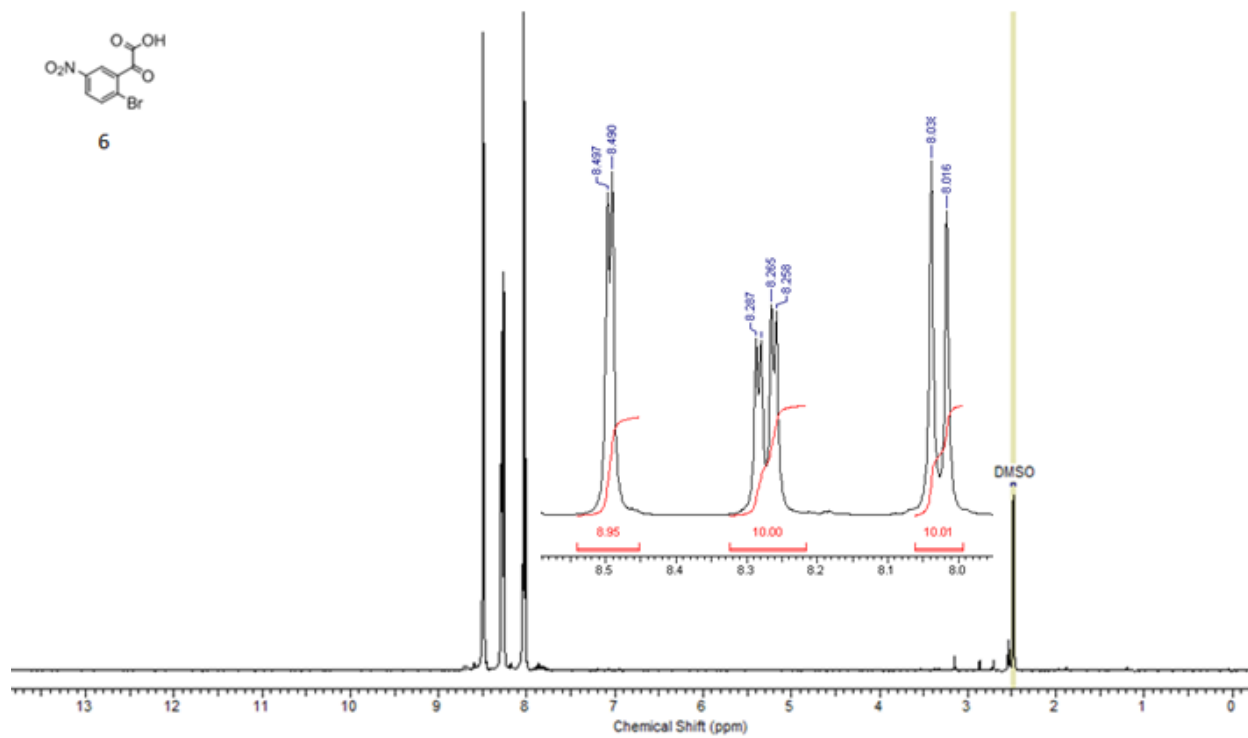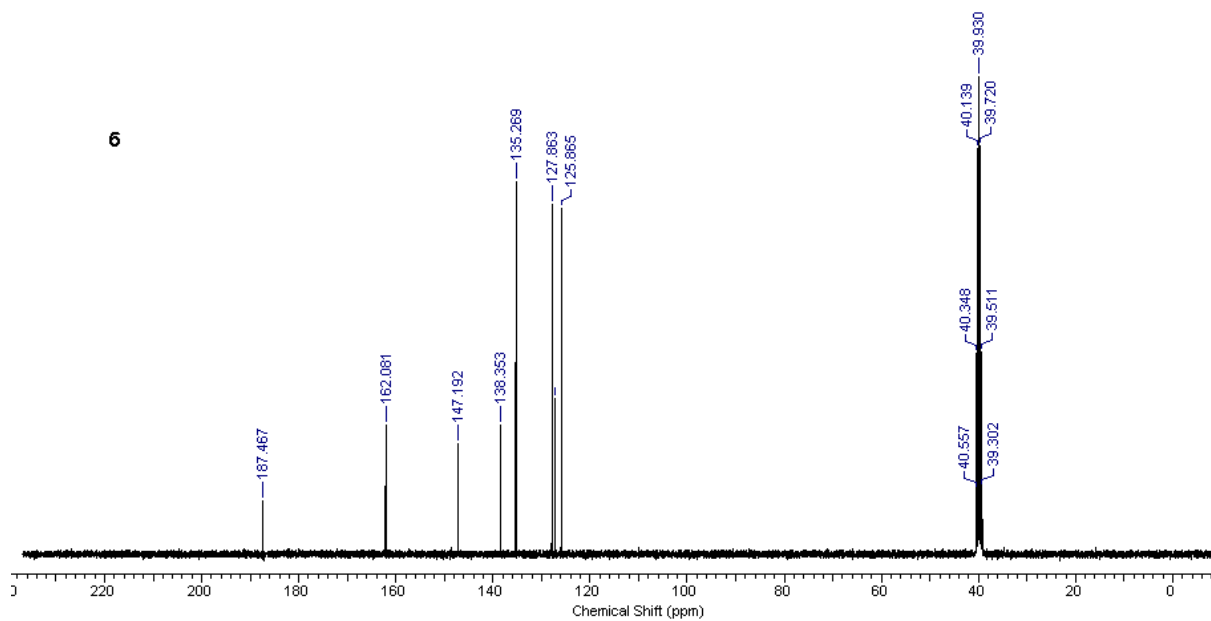

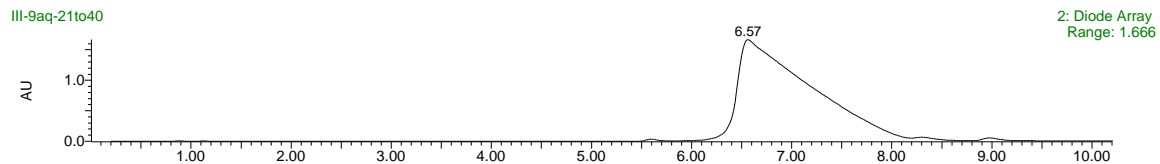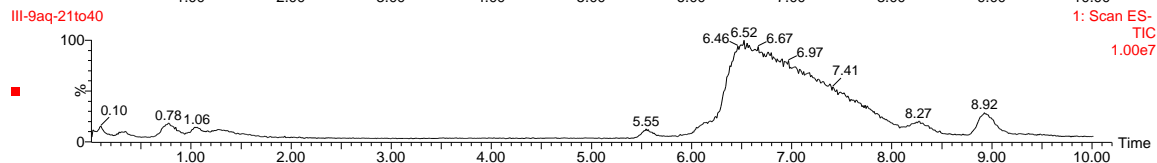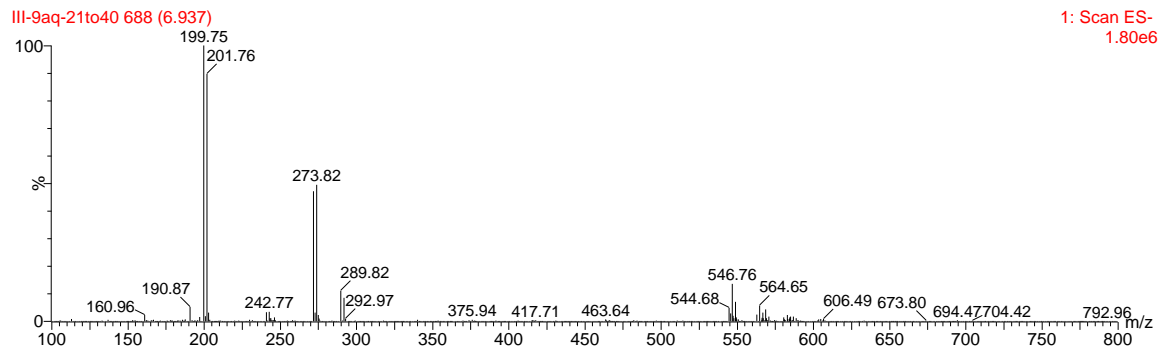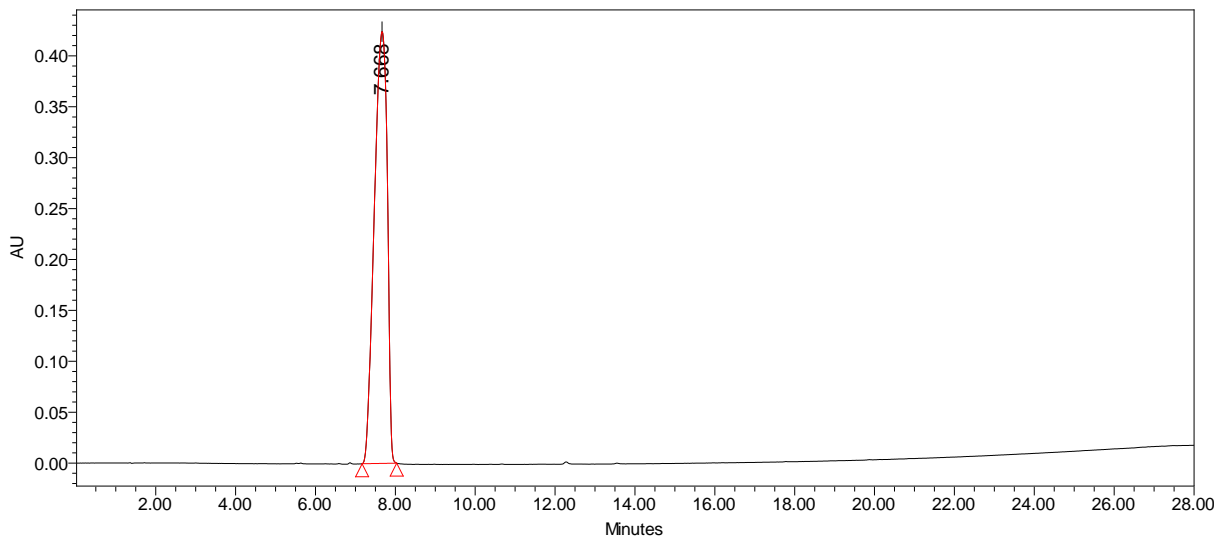

|   | Retention Time | % Area |
|---|----------------|--------|
| 1 | 7.668          | 100.00 |

7a

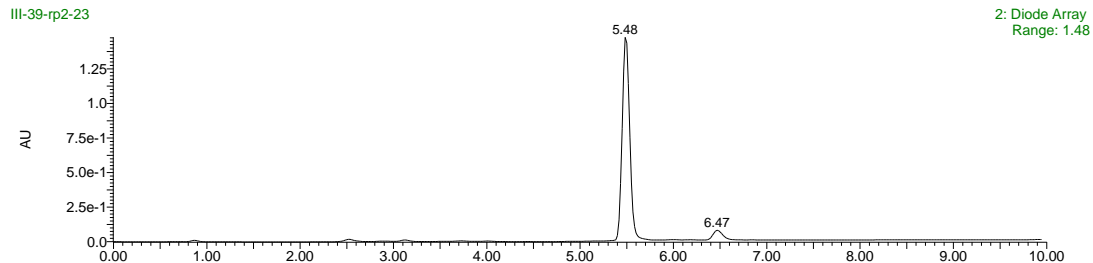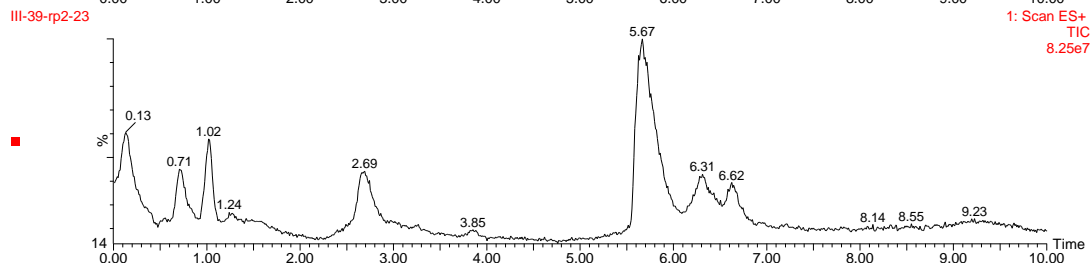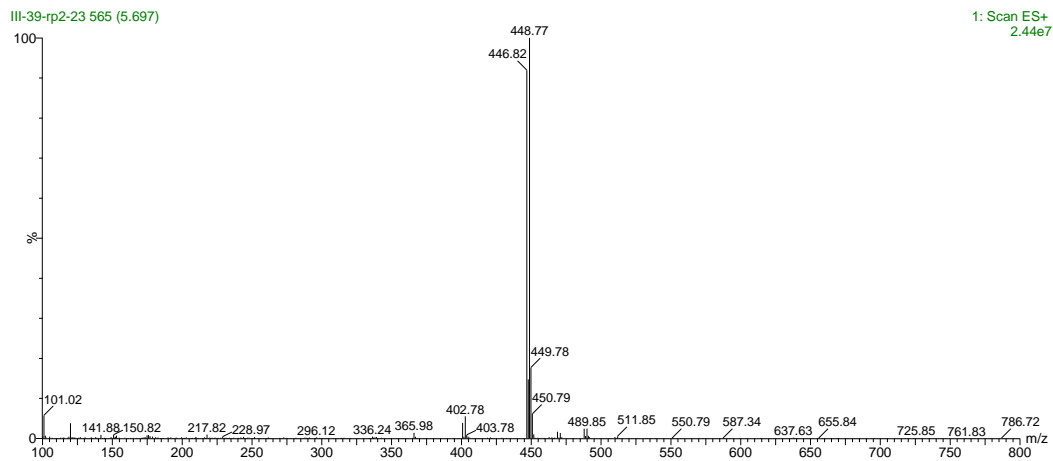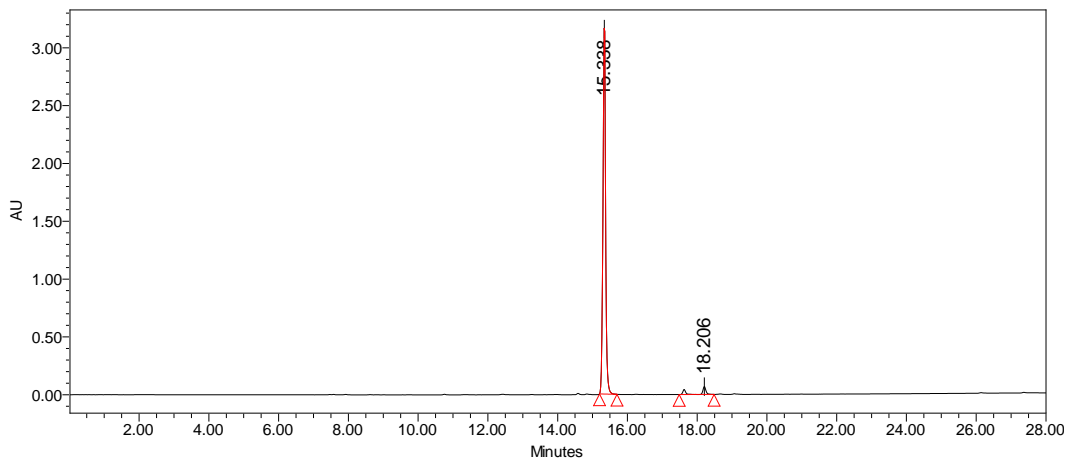

|   | Retention Time | % Area |
|---|----------------|--------|
| 1 | 15.338         | 96.27  |
| 2 | 18.206         | 3.73   |

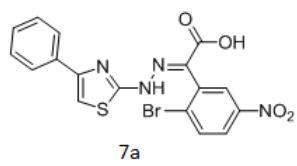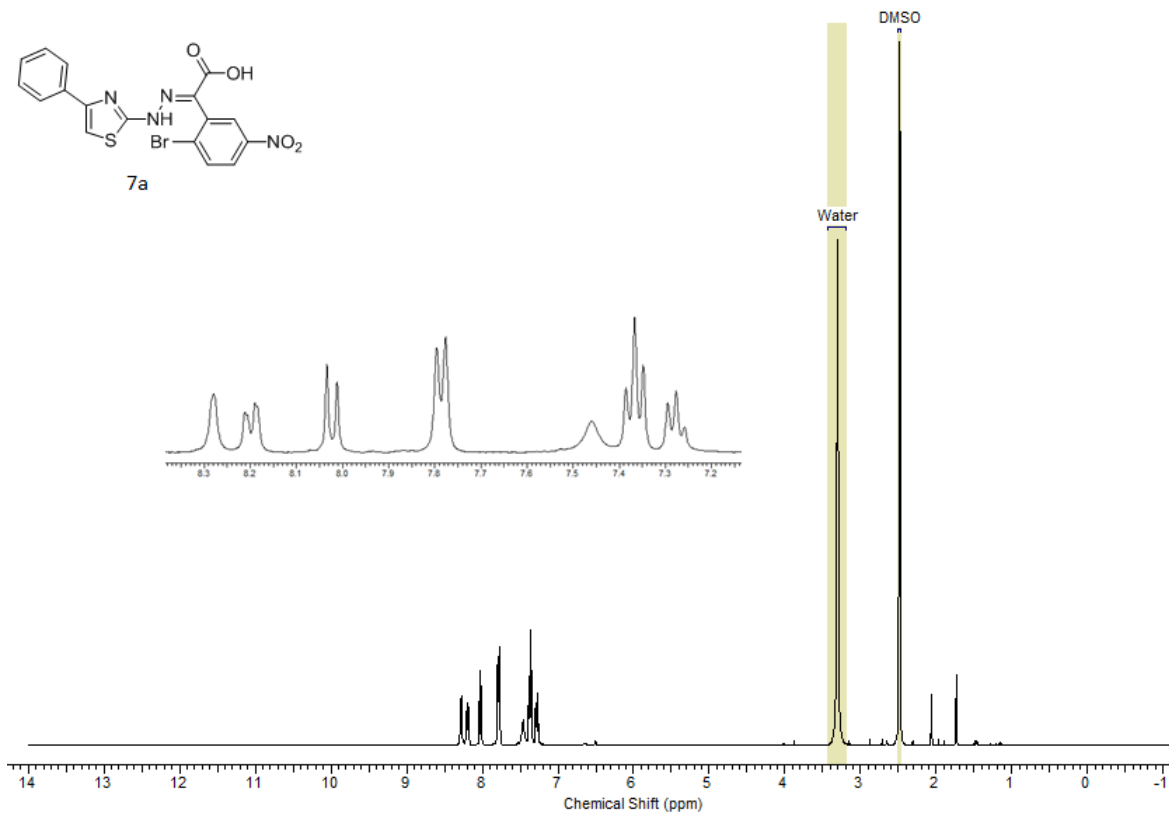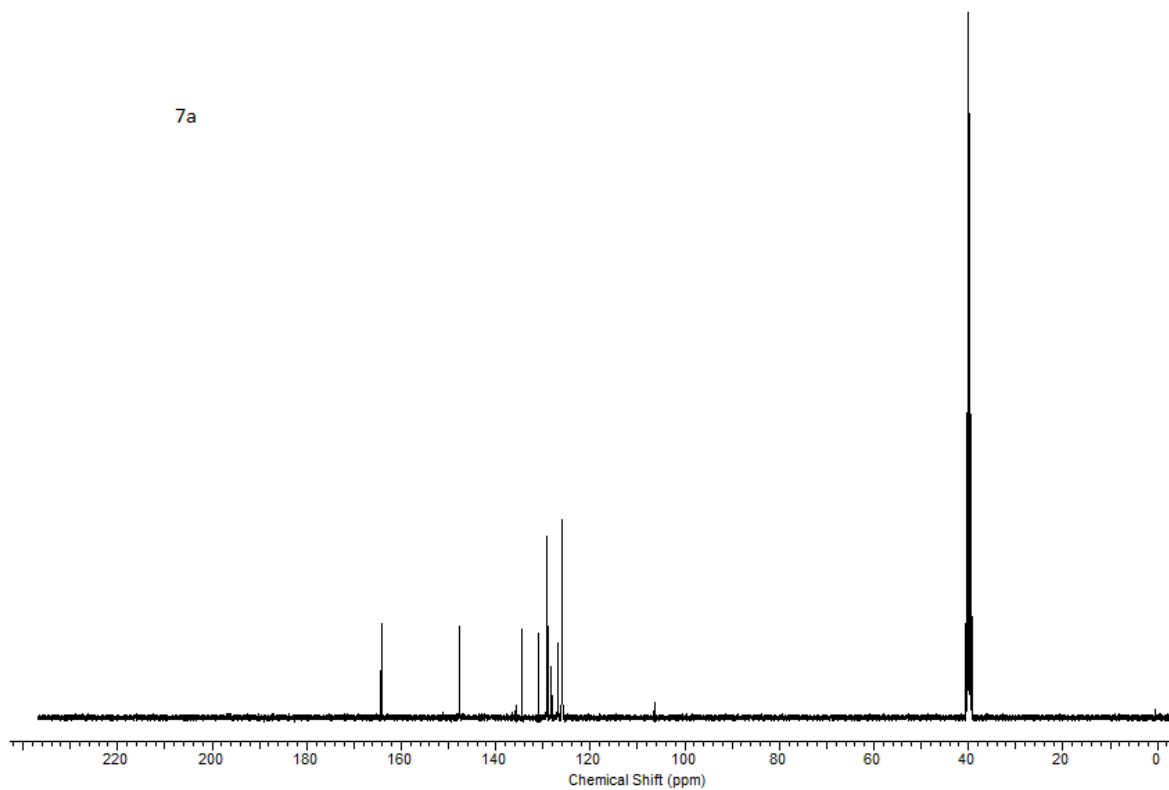

# 7b

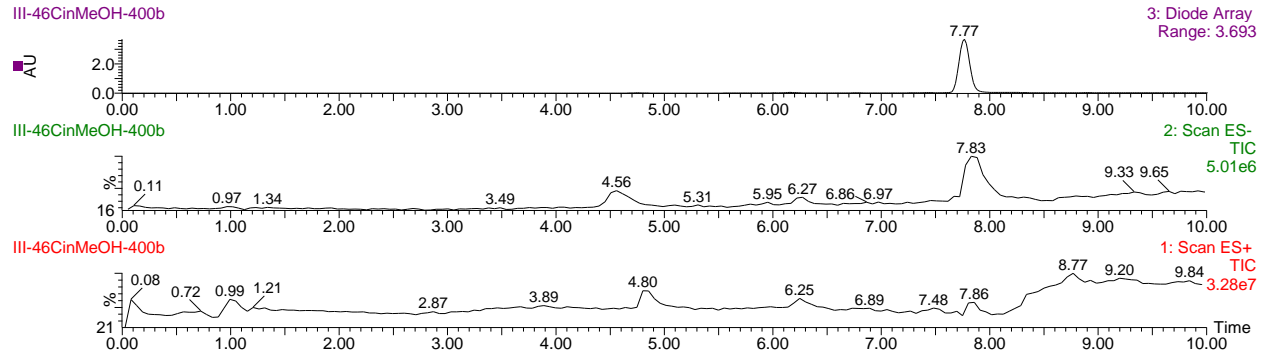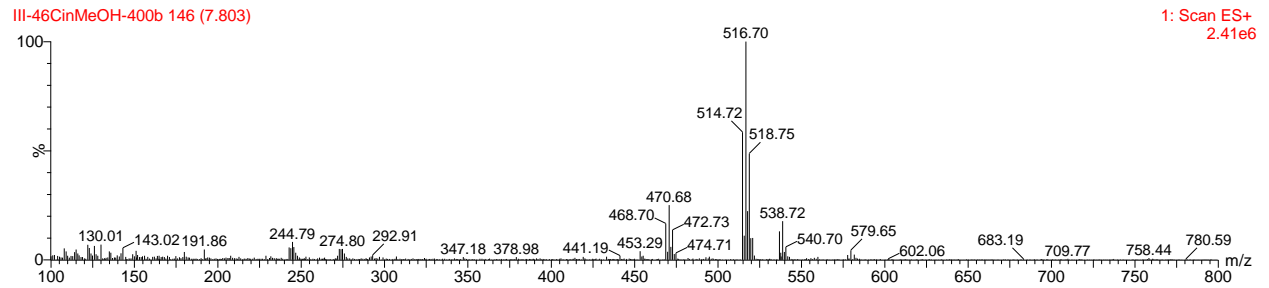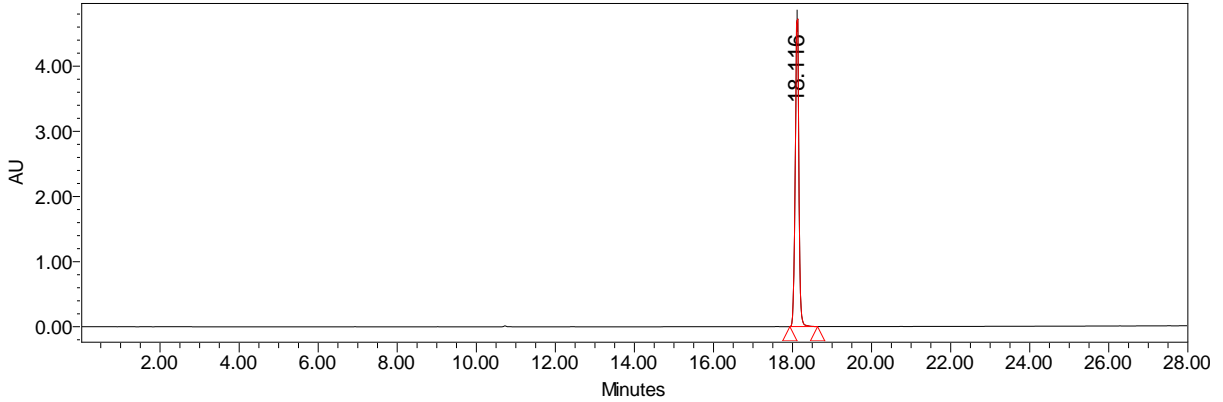

|   | Retention Time | % Area |
|---|----------------|--------|
| 1 | 18.116         | 100.00 |



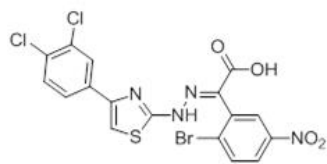

7b

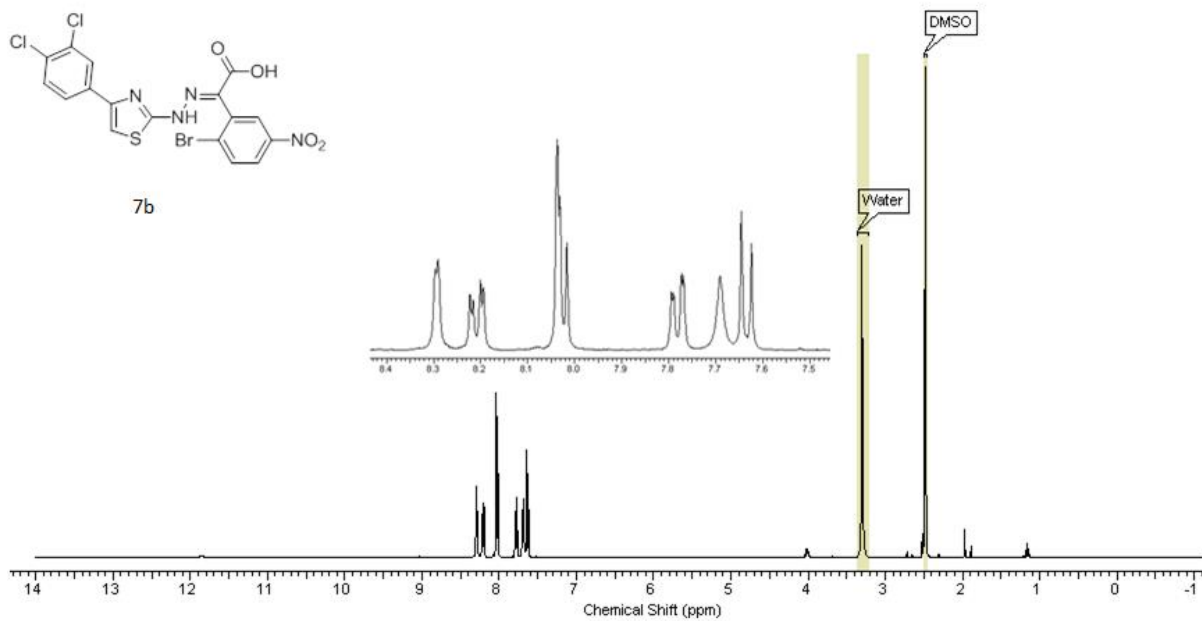

# 7c

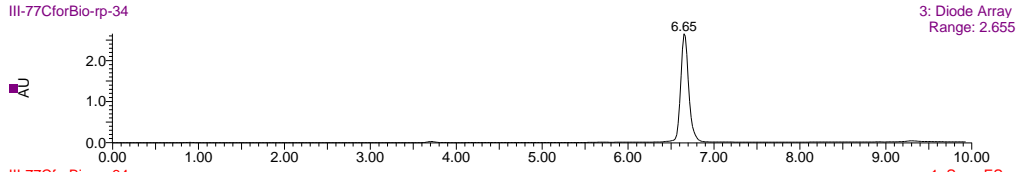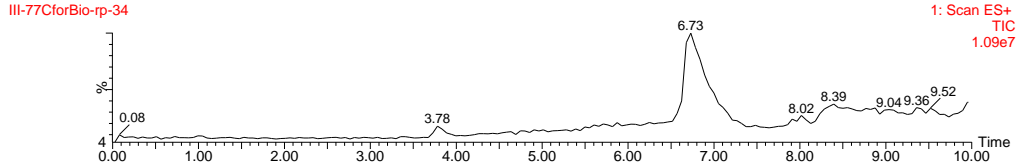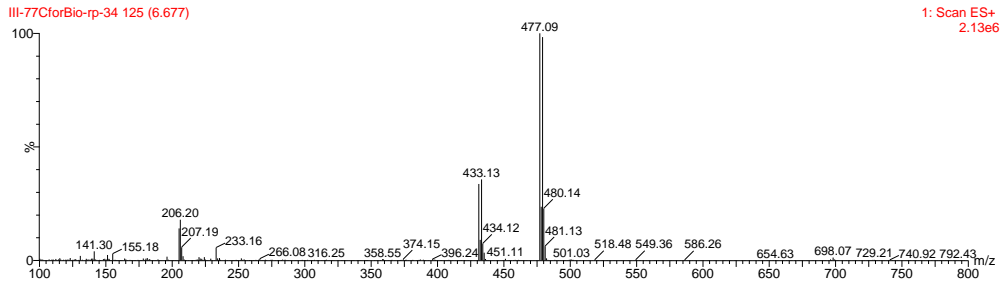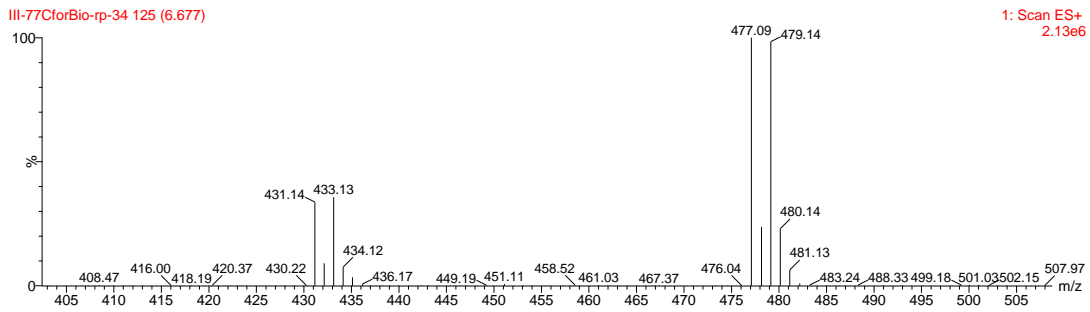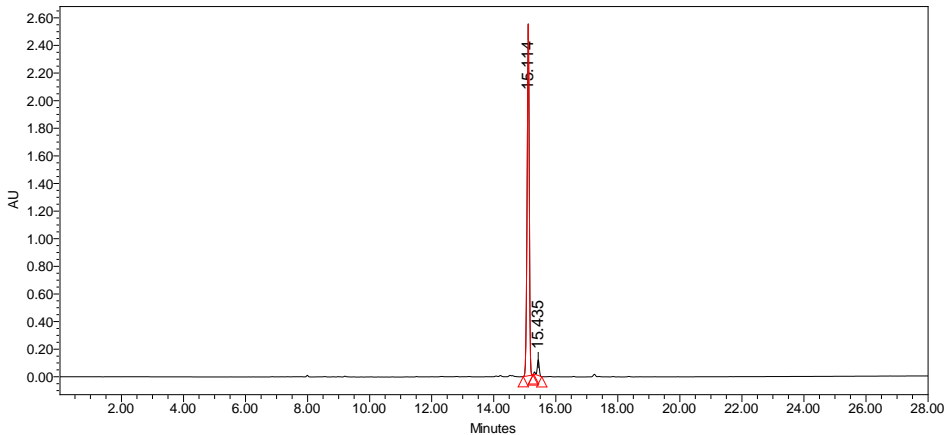

|   | Retention Time | % Area |
|---|----------------|--------|
| 1 | 15.114         | 95.81  |
| 2 | 15.435         | 4.19   |

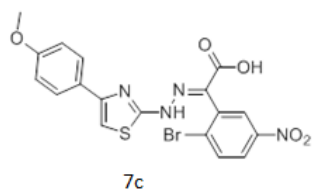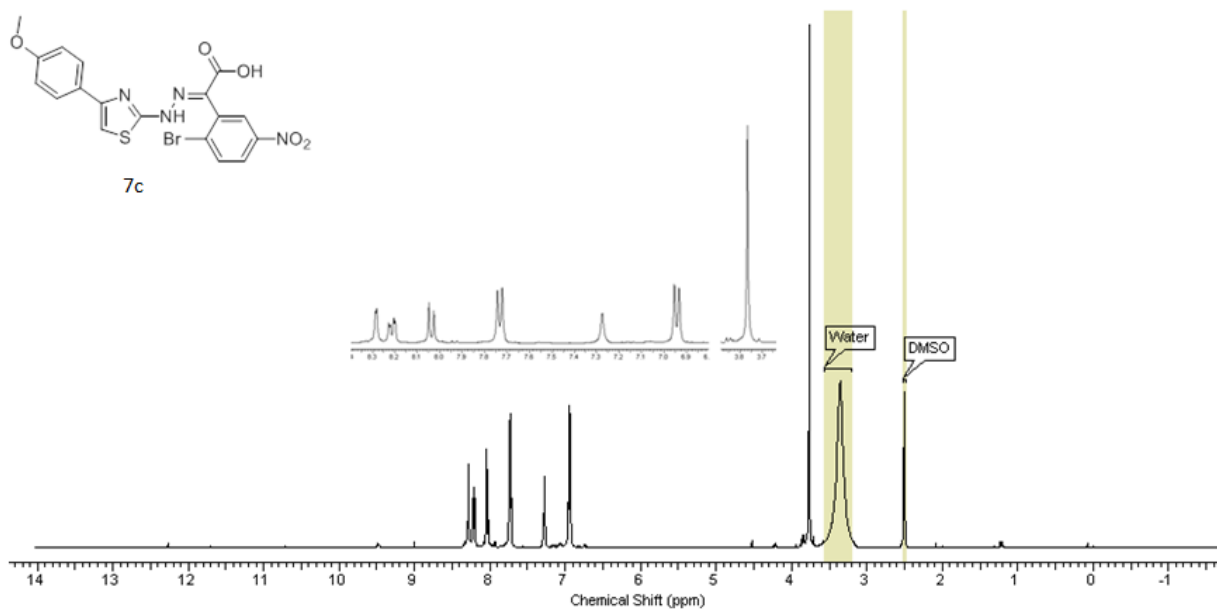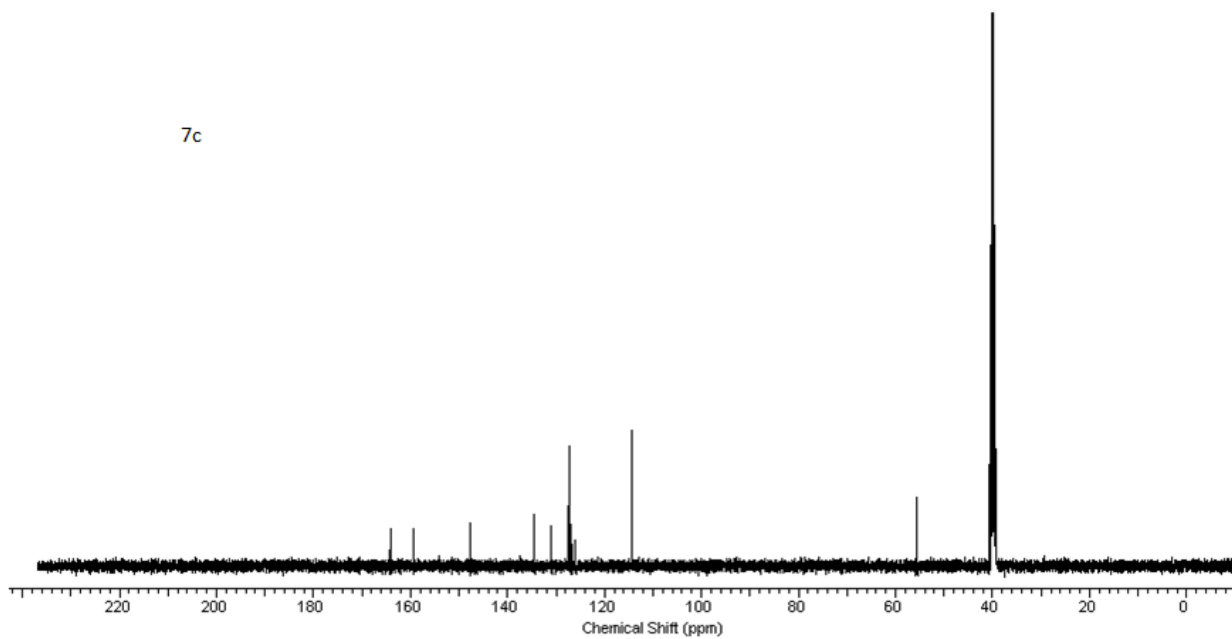

# 7d

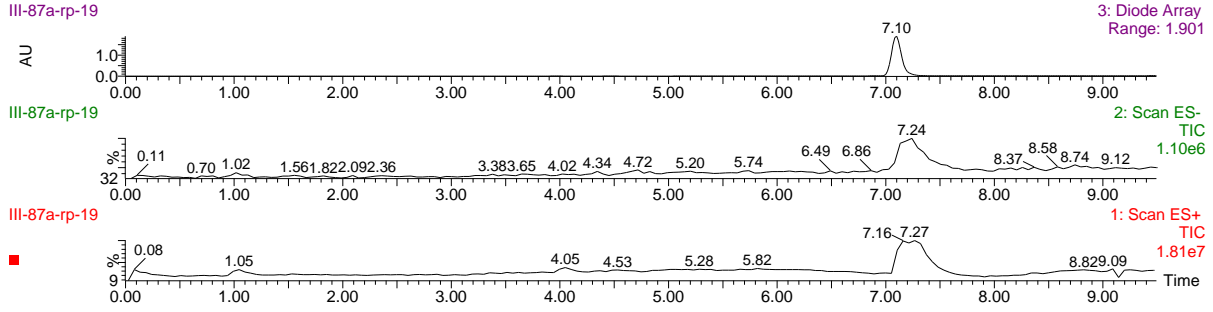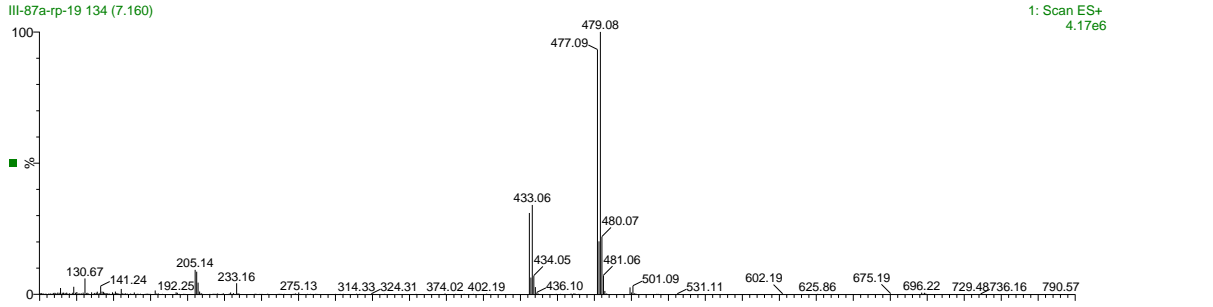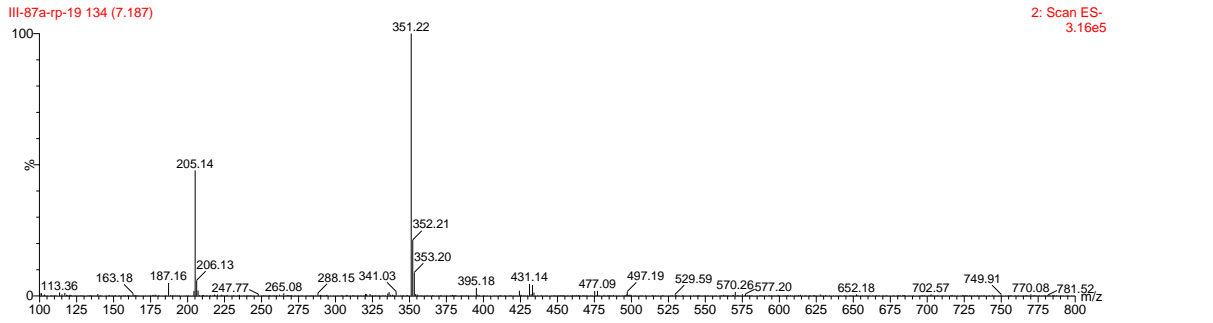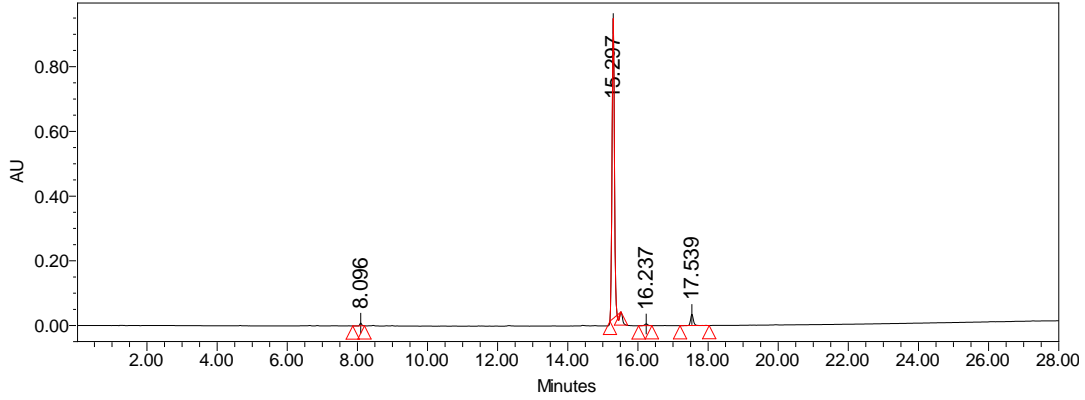

| Retention Time | % Area |
|----------------|--------|
| 8.096          | 0.69   |
| 15.297         | 94.32  |
| 16.237         | 0.75   |
| 17.539         | 4.24   |

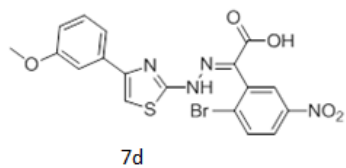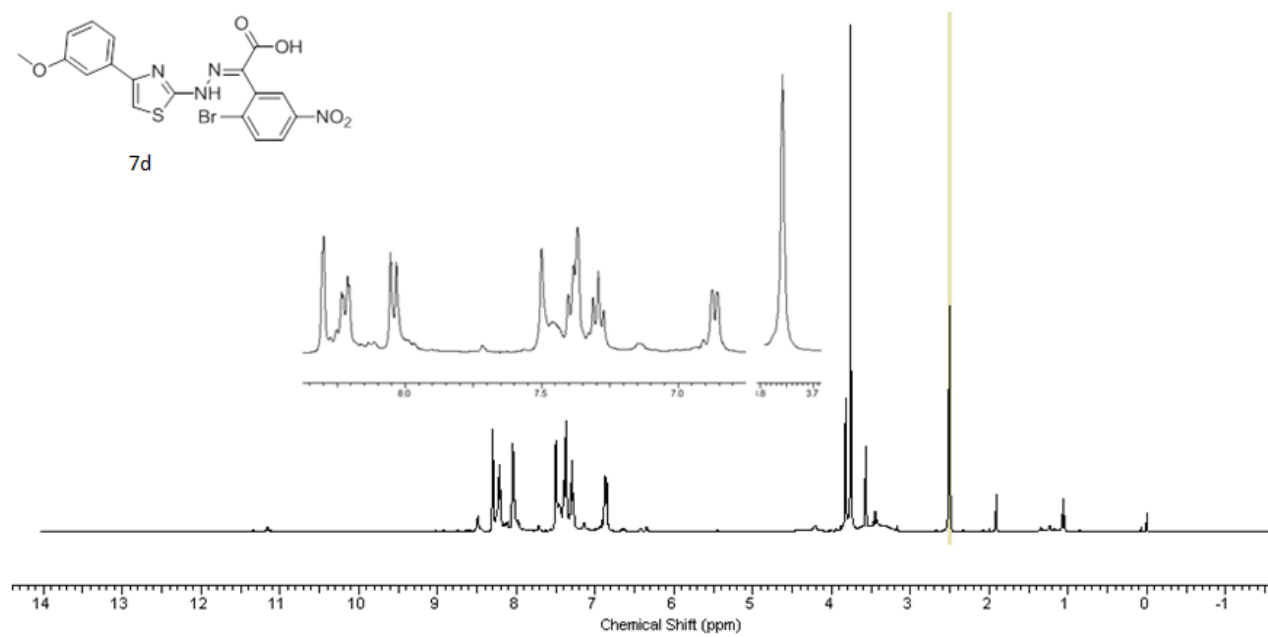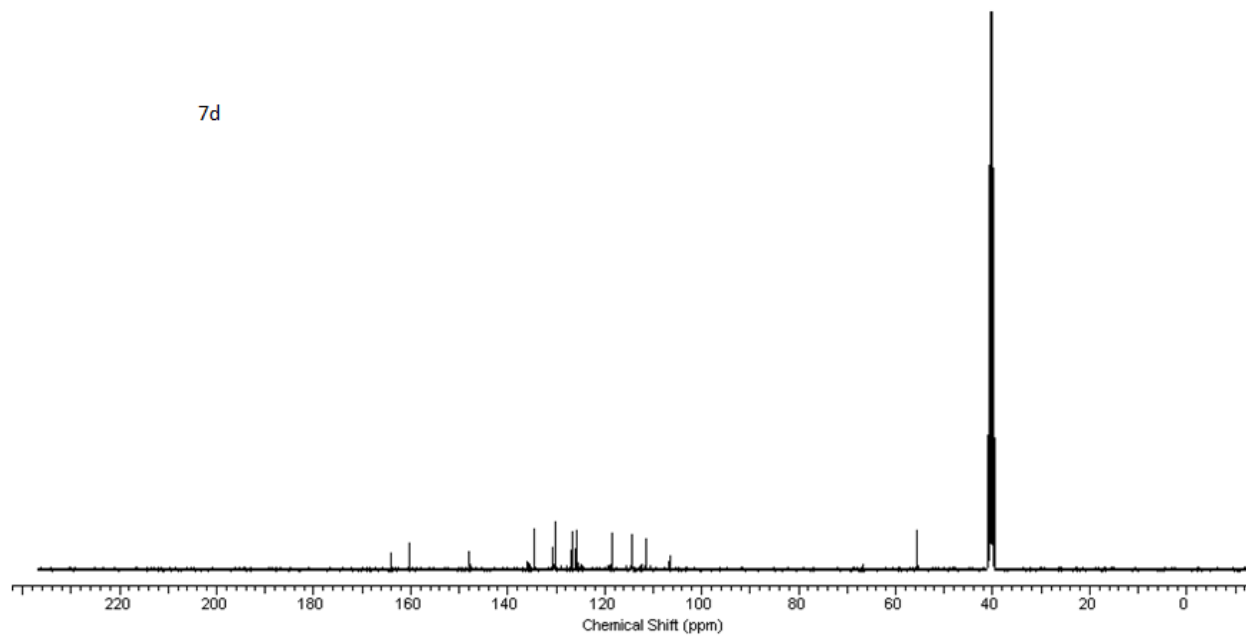

7g

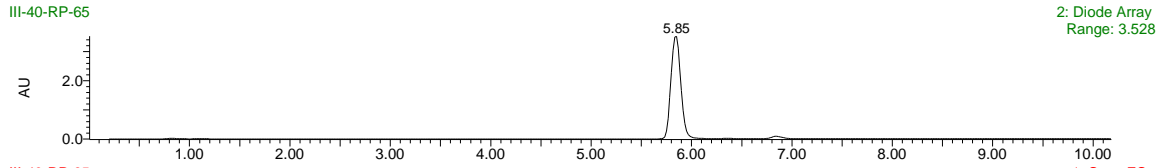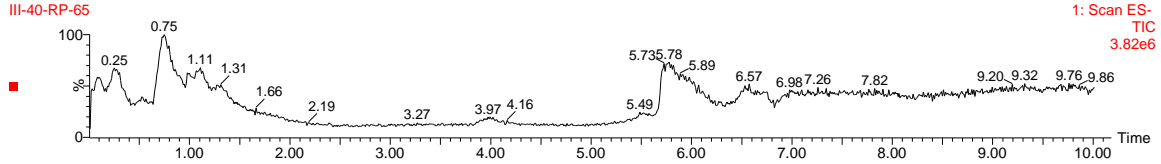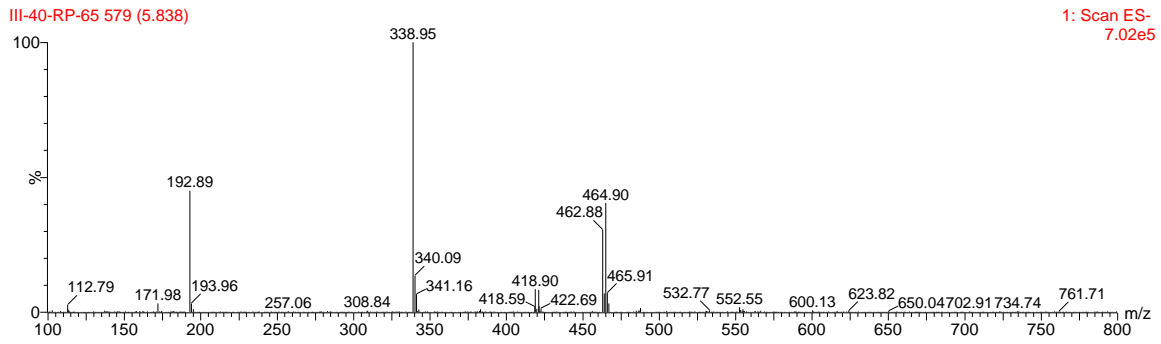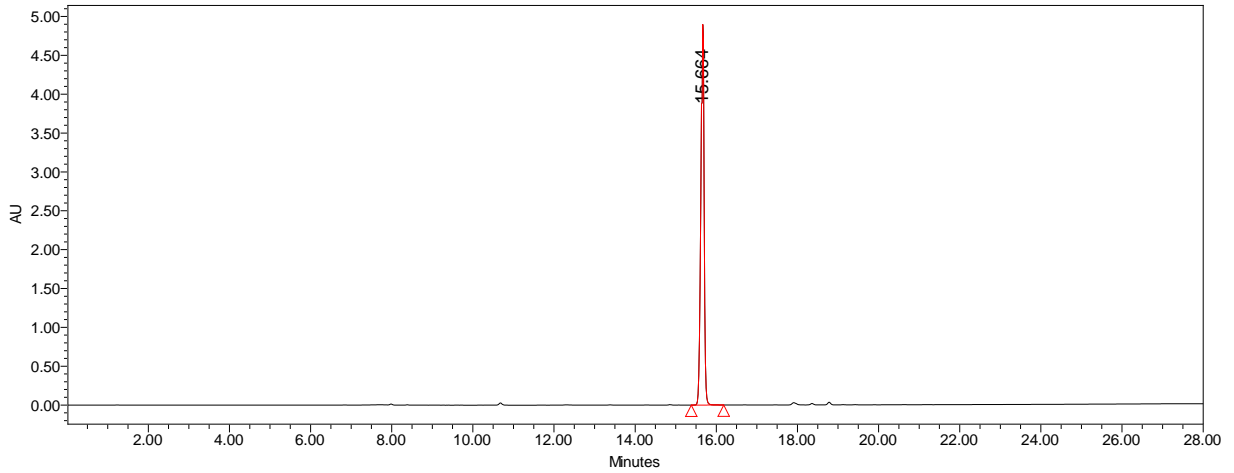

|   | Retention Time | % Area |
|---|----------------|--------|
| 1 | 15.664         | 100.00 |

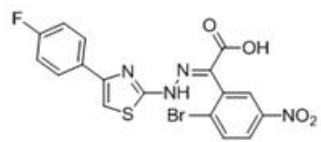

7g

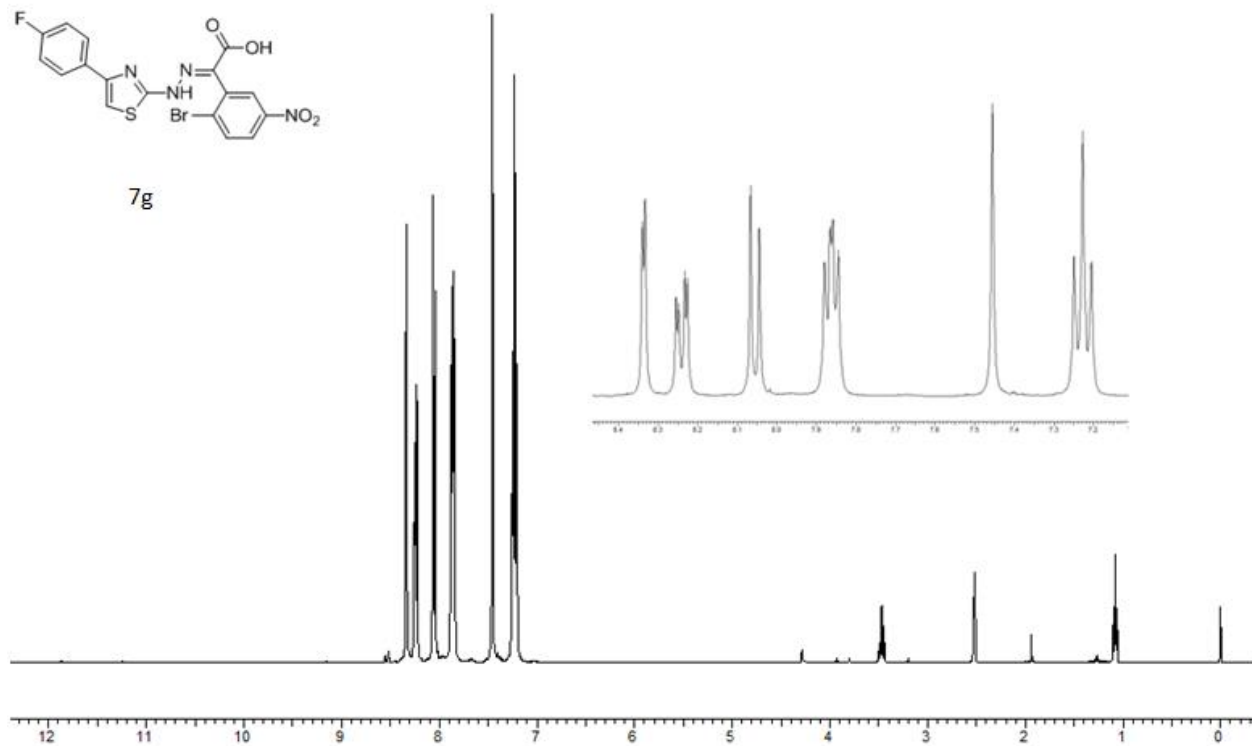

7g

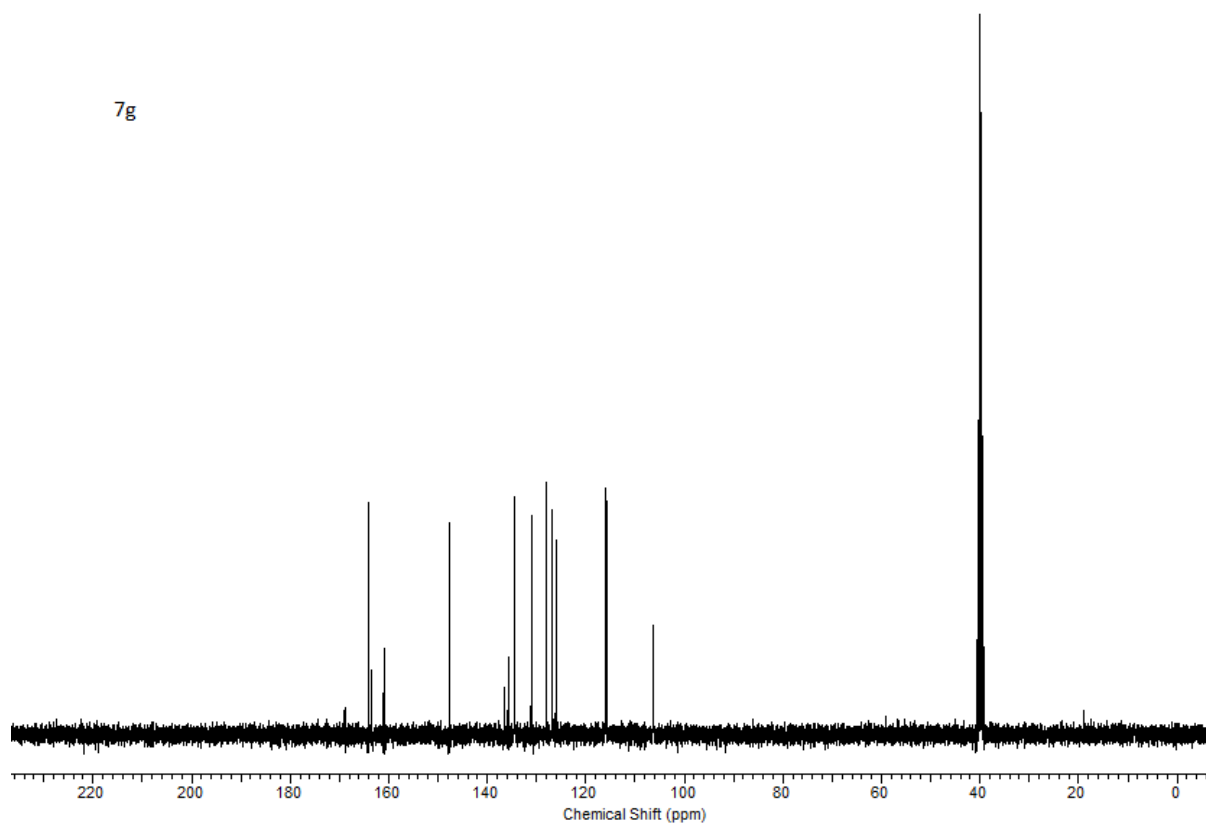

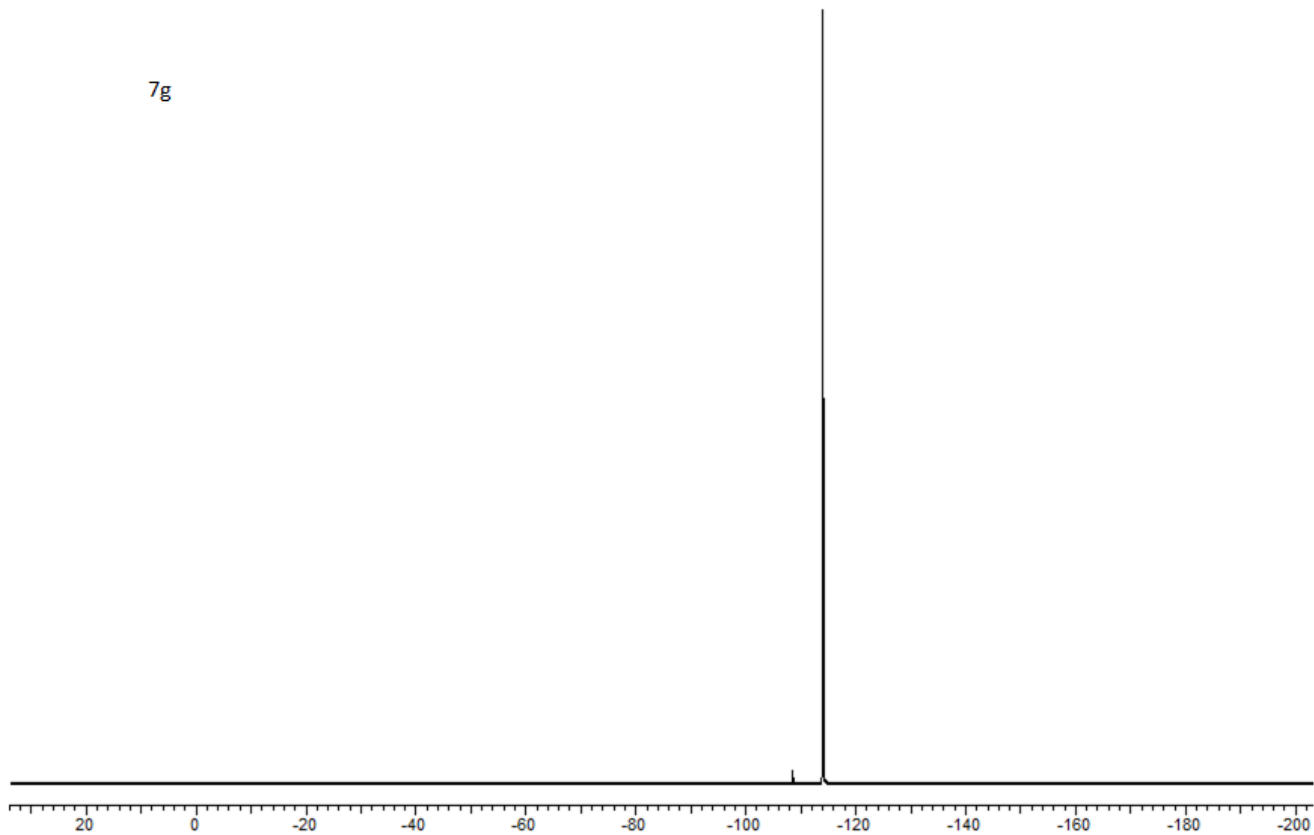



# 7h

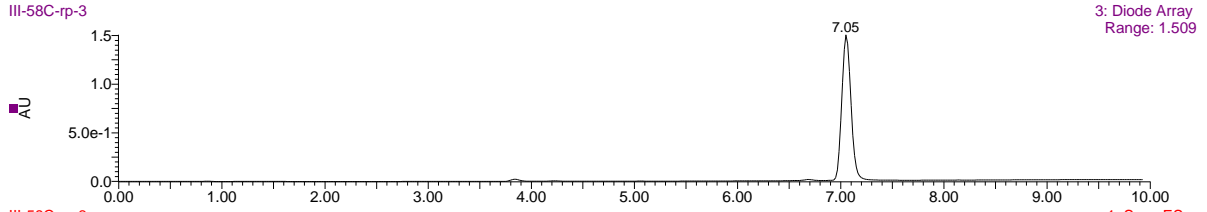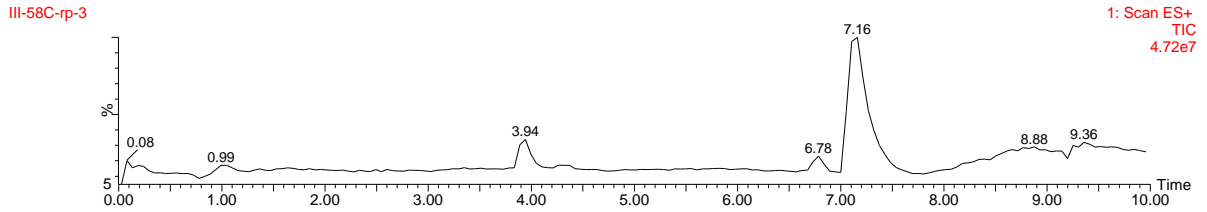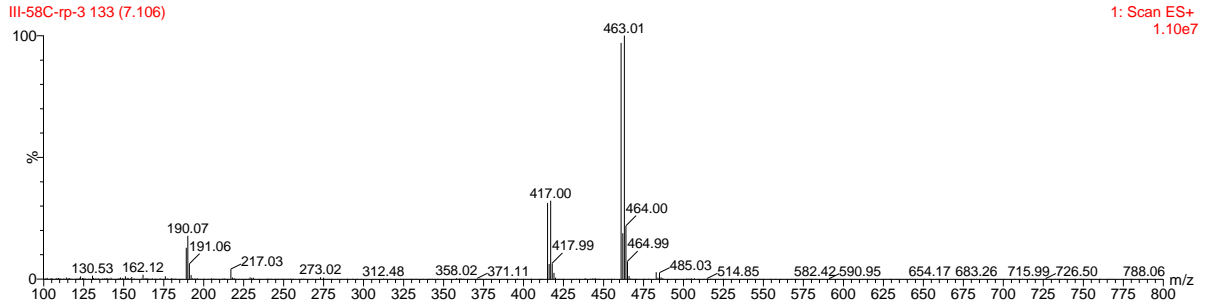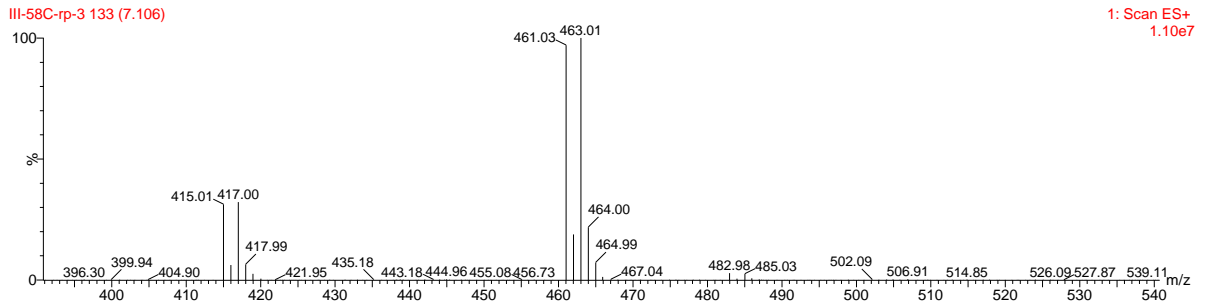

|   | Retention Time | % Area |
|---|----------------|--------|
| 1 | 15.432         | 100.00 |

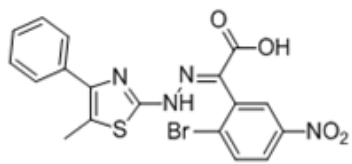

7h

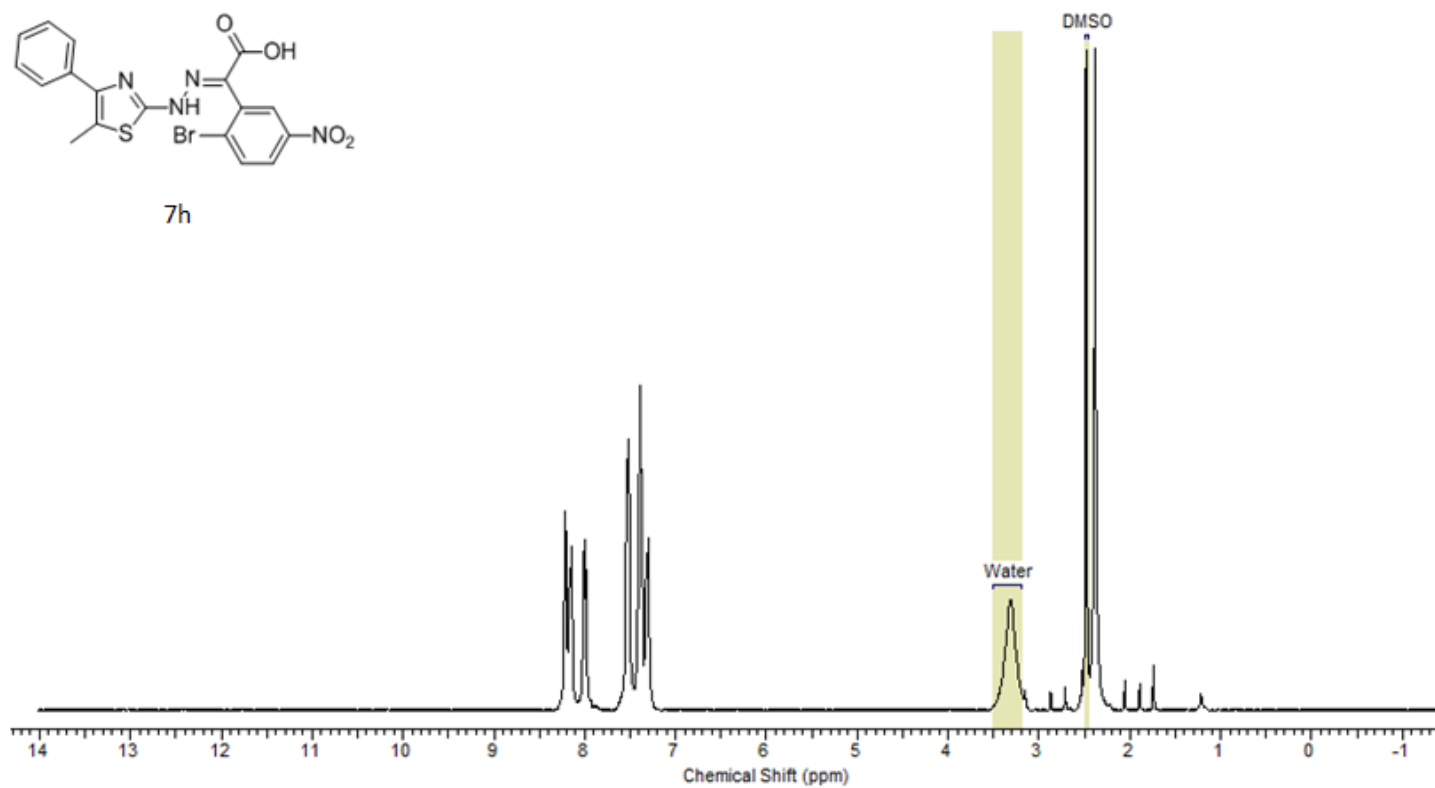

7h

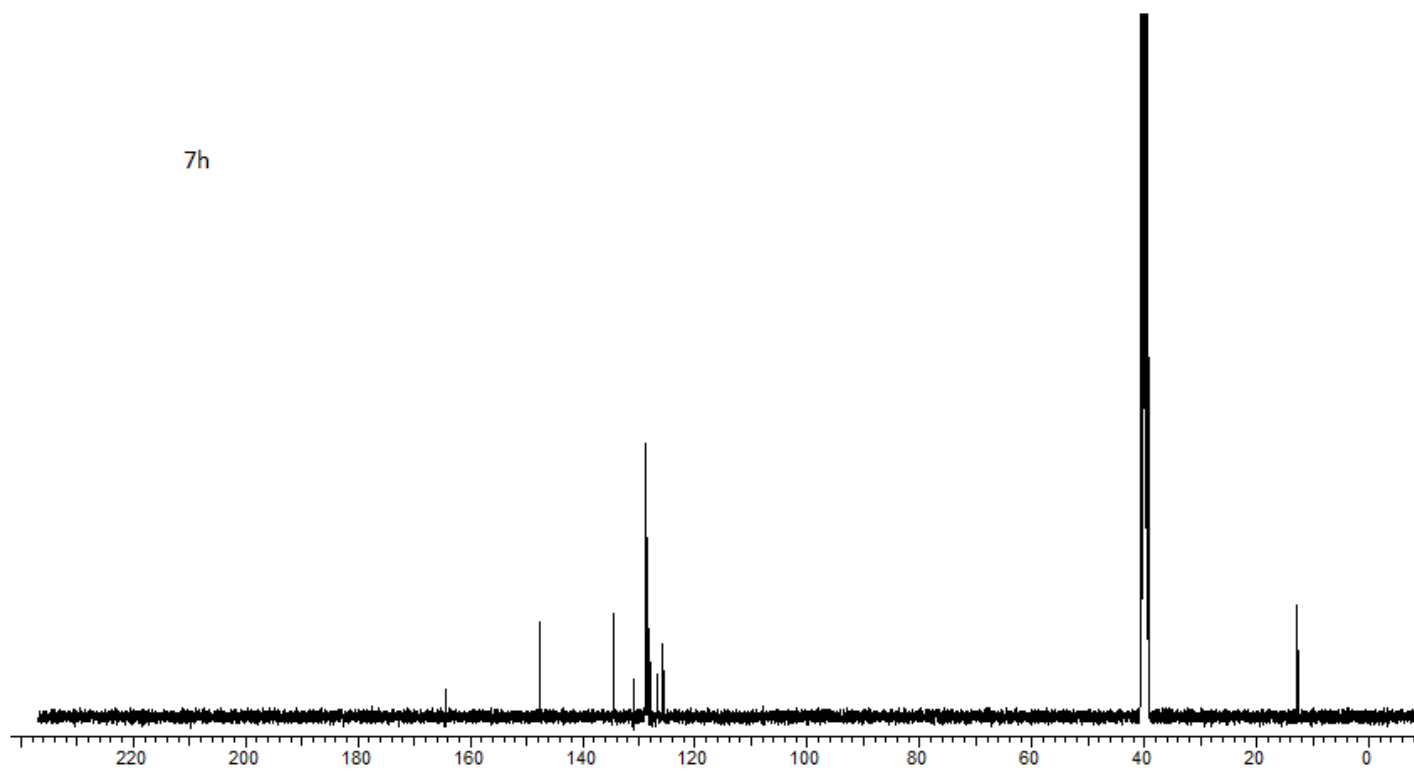

7i

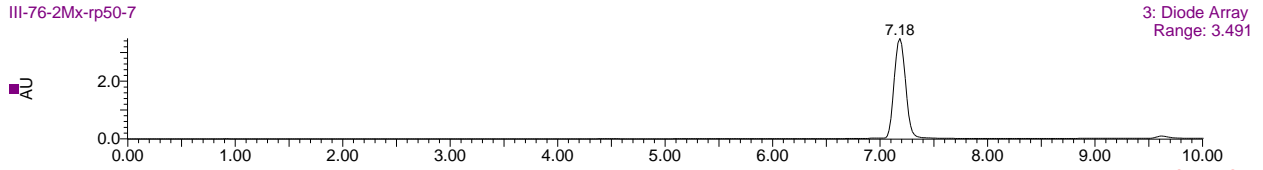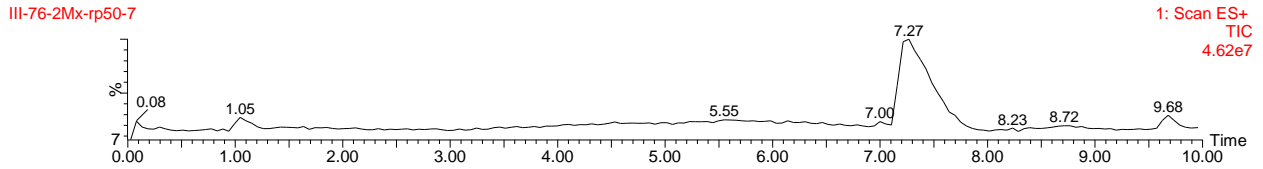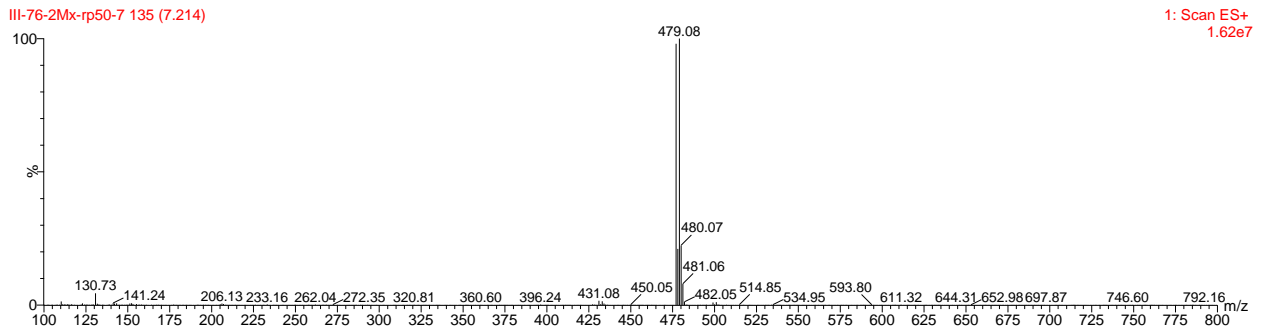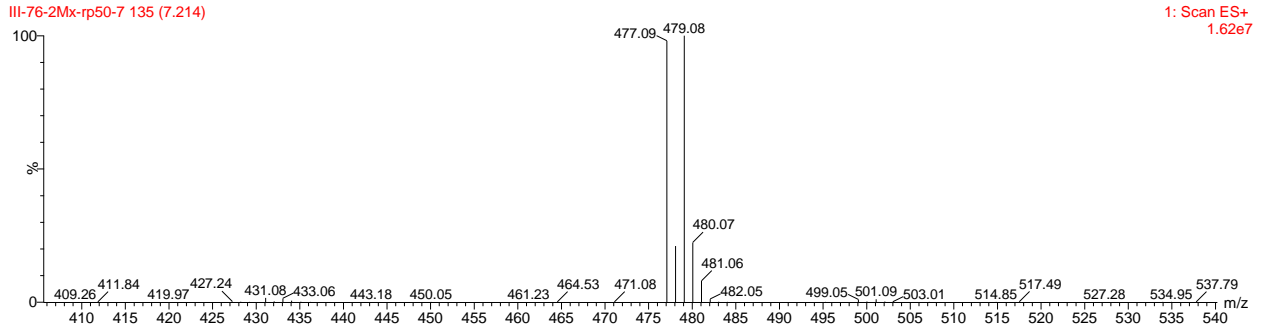

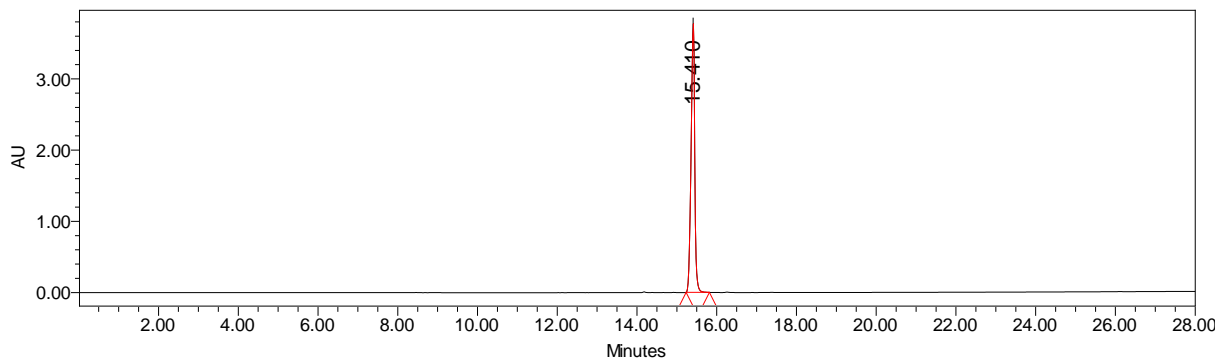

|   | Retention Time | % Area |
|---|----------------|--------|
| 1 | 15.410         | 100.00 |

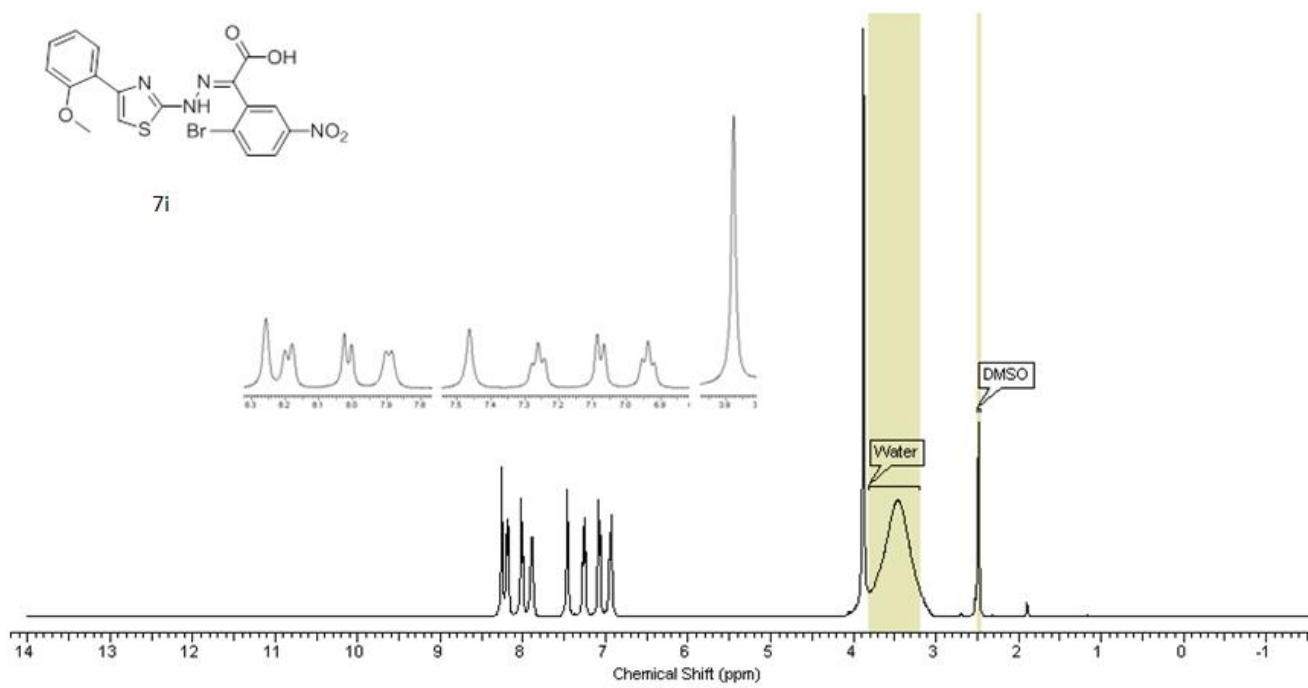

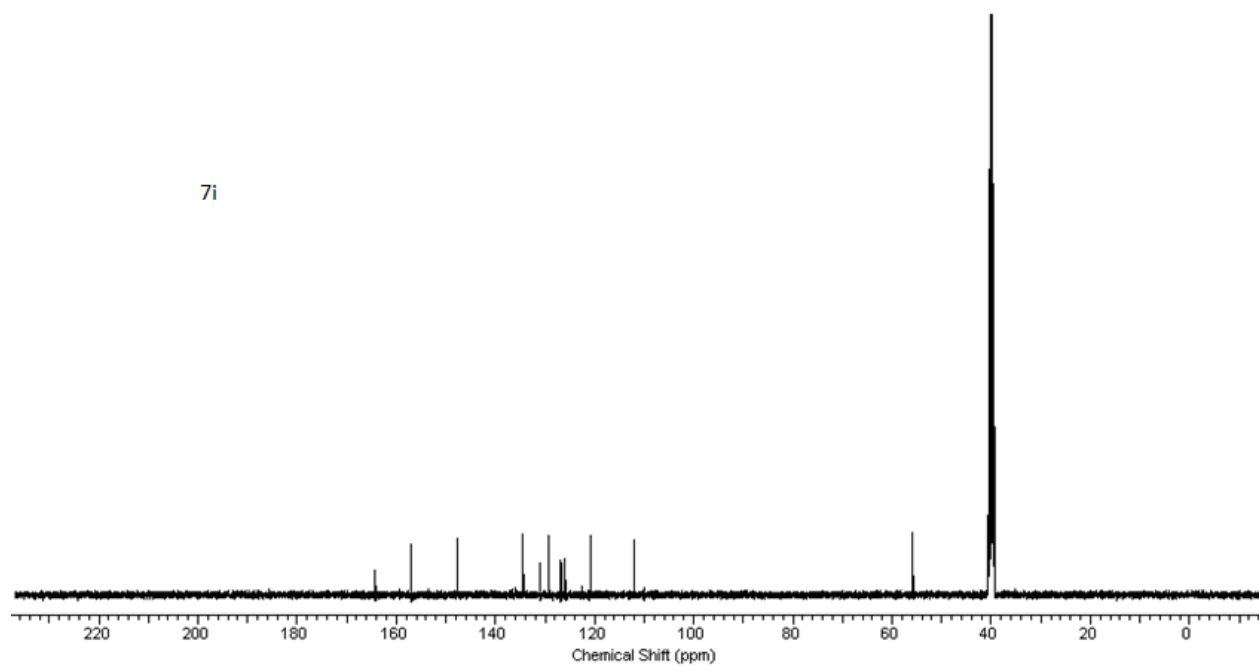

7j

III-78-14

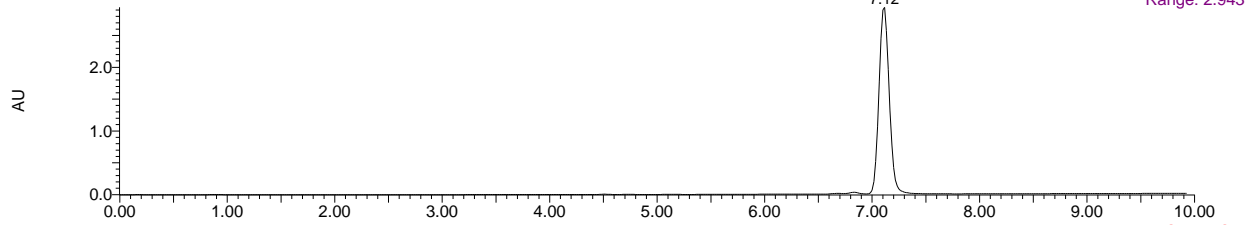

III-78-14

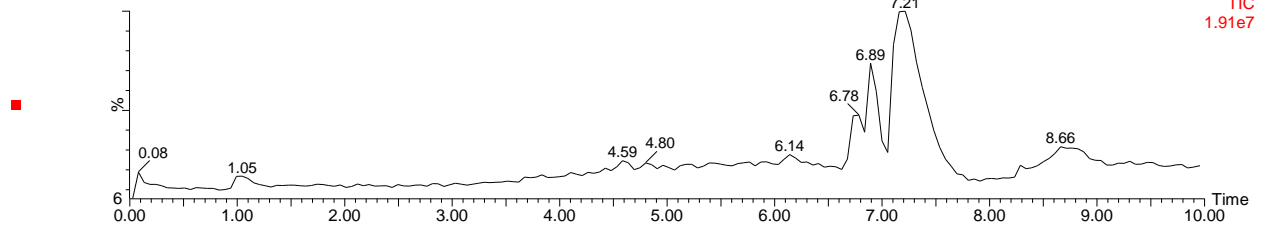

III-78-14 134 (7.160)

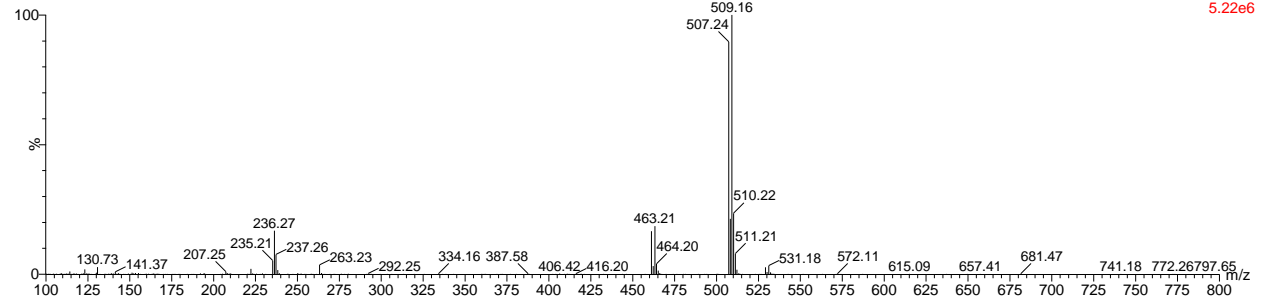

III-78-14 134 (7.160)

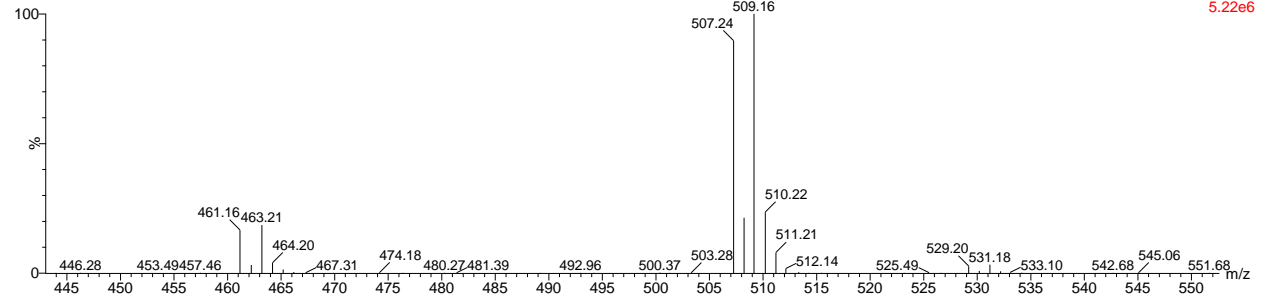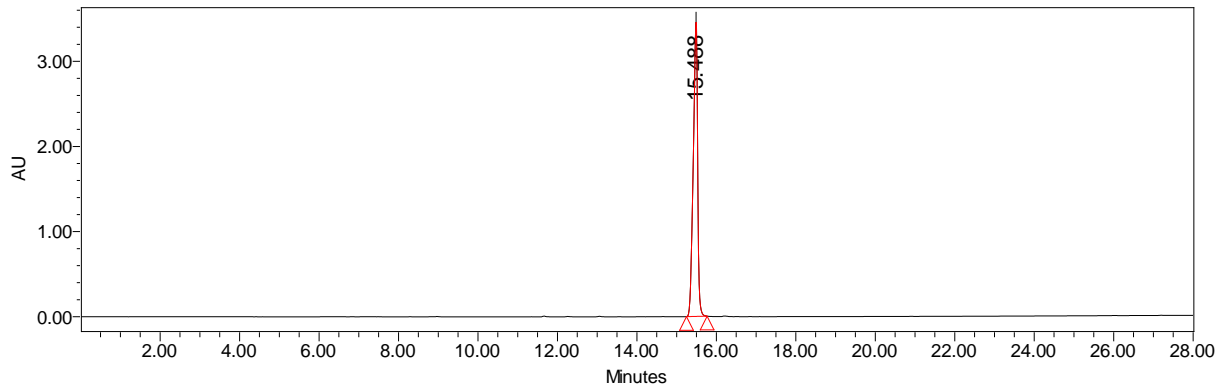

|   | Retention Time | % Area |
|---|----------------|--------|
| 1 | 15.488         | 100.00 |

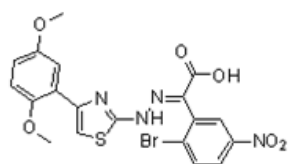

**7j**

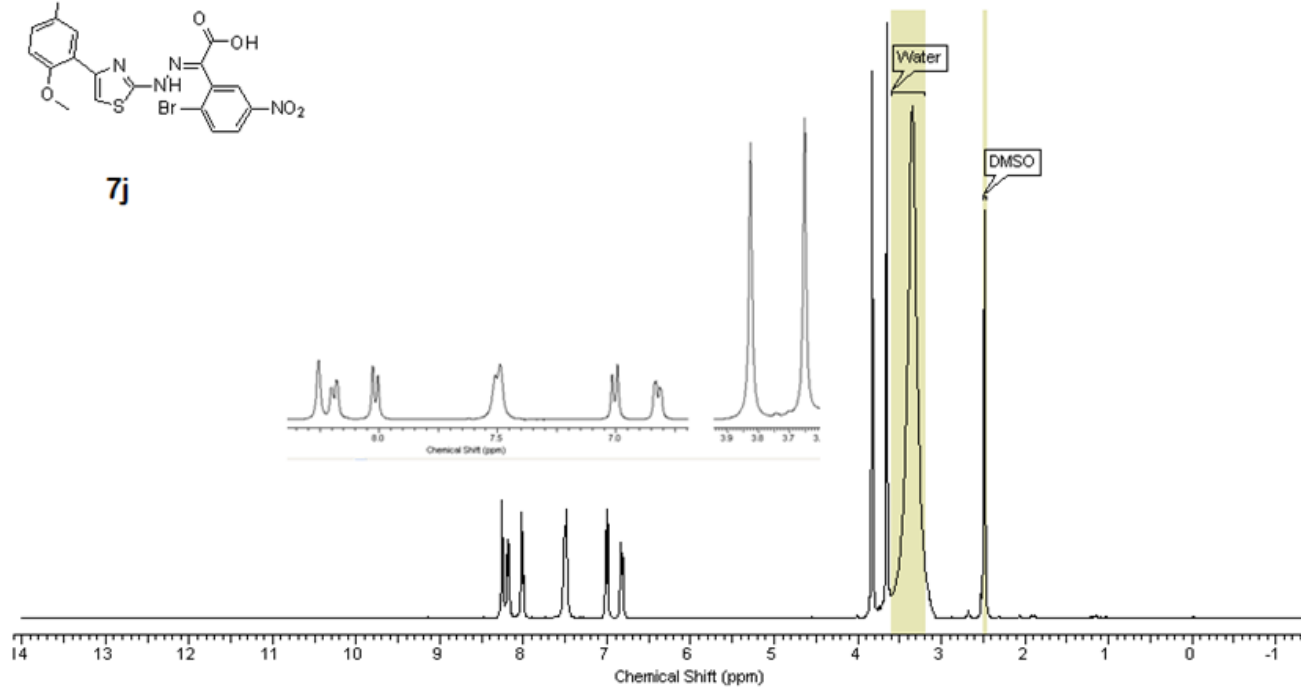

**7j**

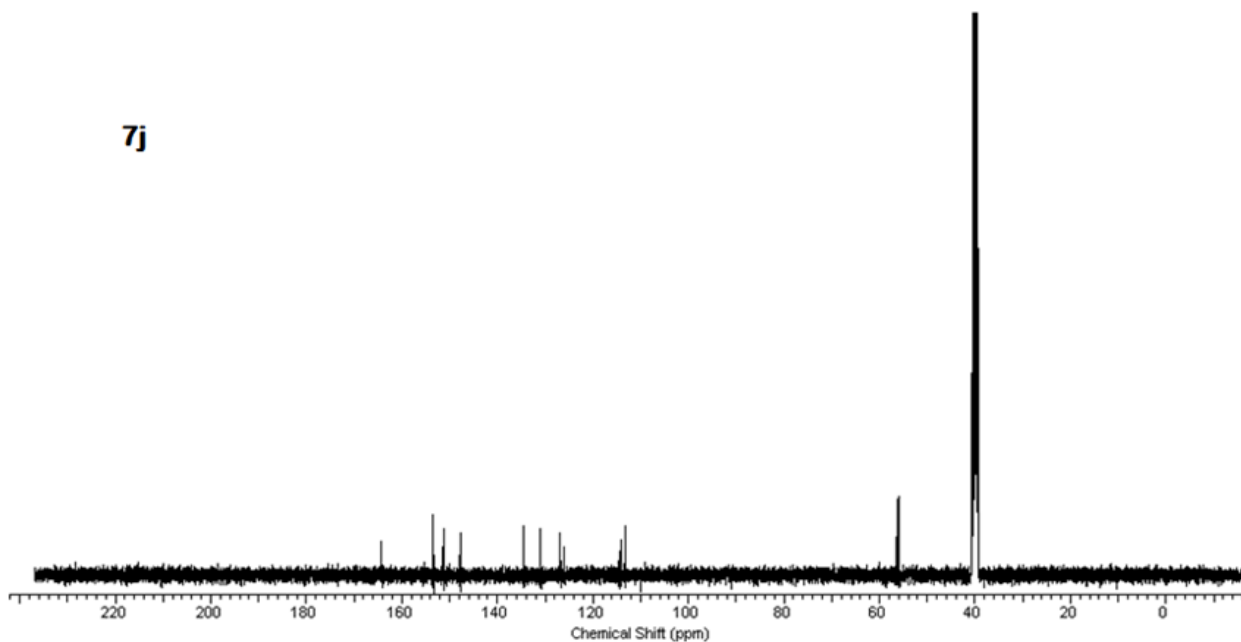

# 7k

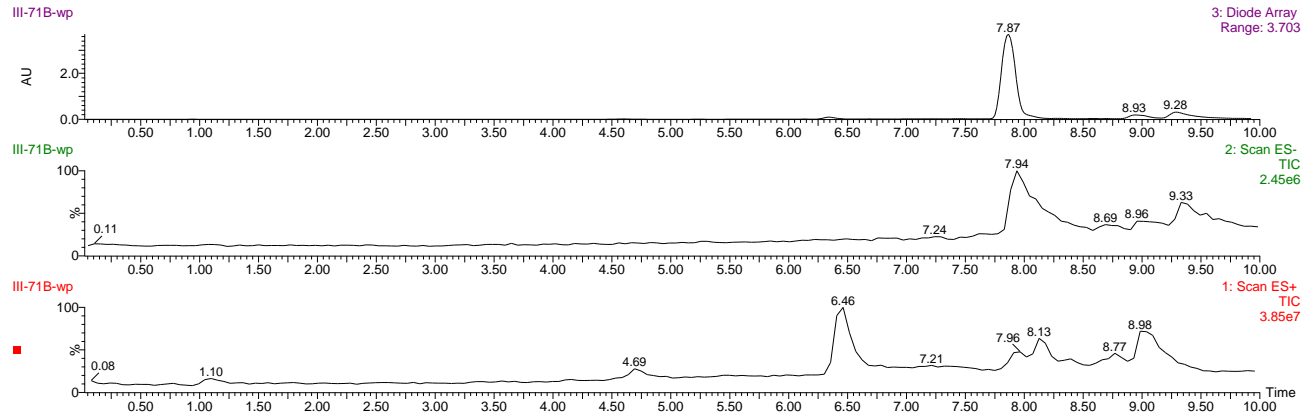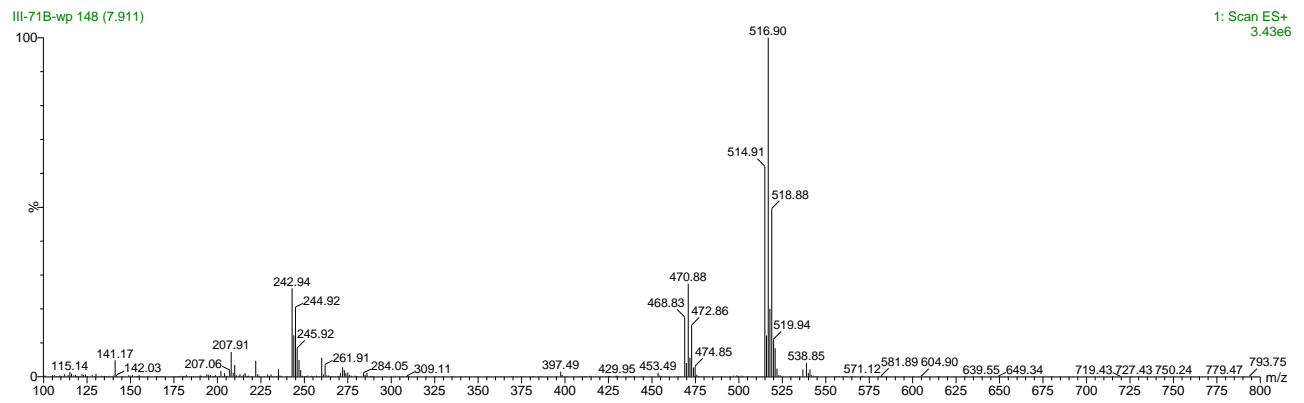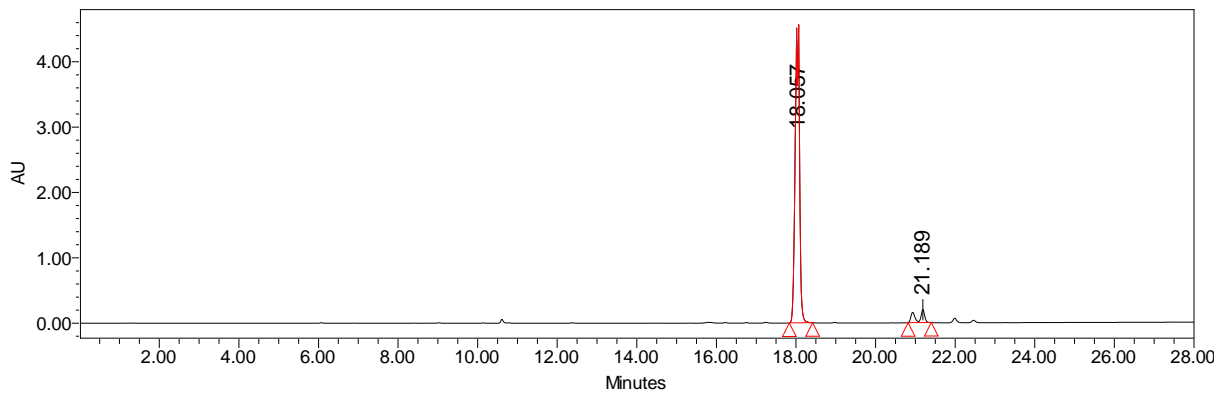

|   | Retention Time | % Area |
|---|----------------|--------|
| 1 | 18.057         | 93.65  |
| 2 | 21.189         | 6.35   |



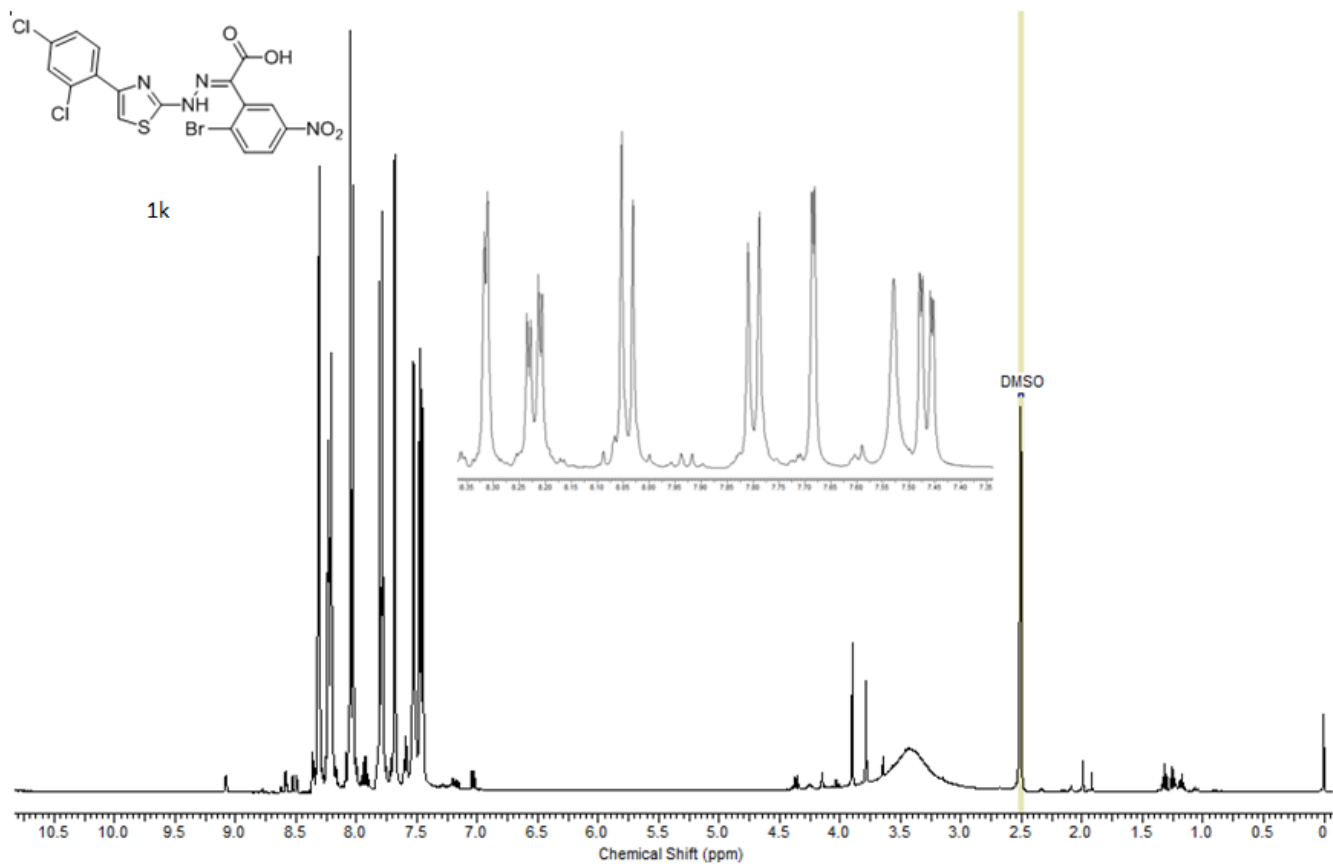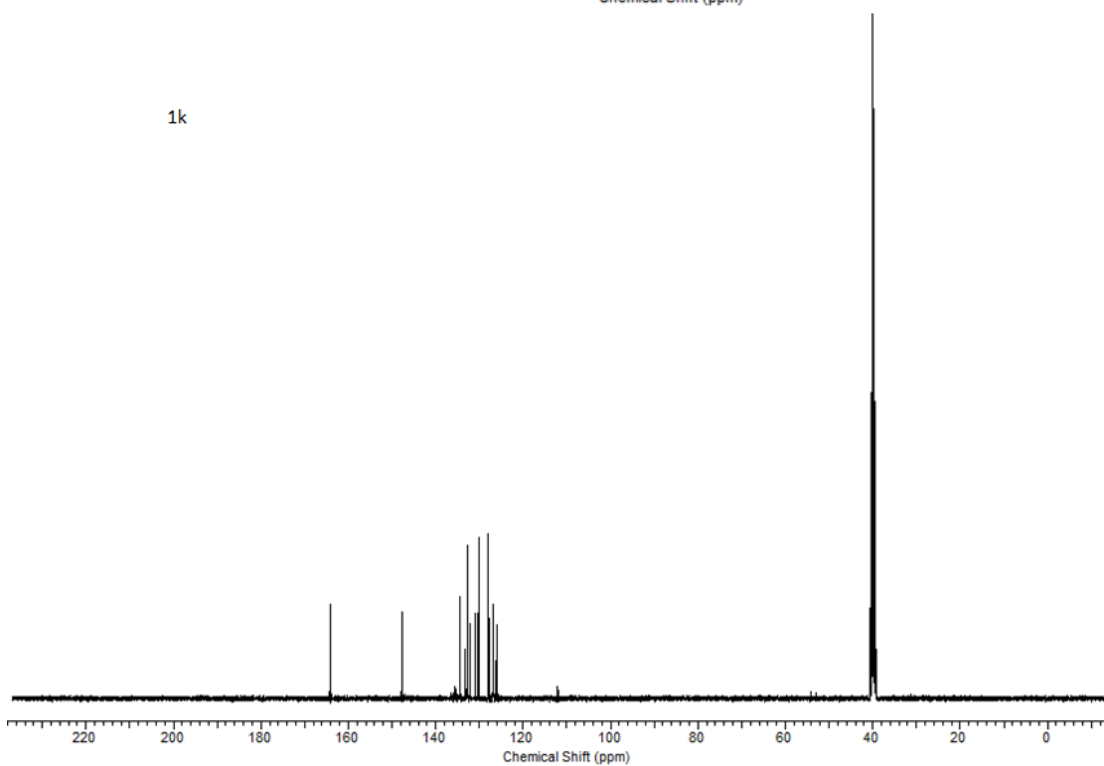

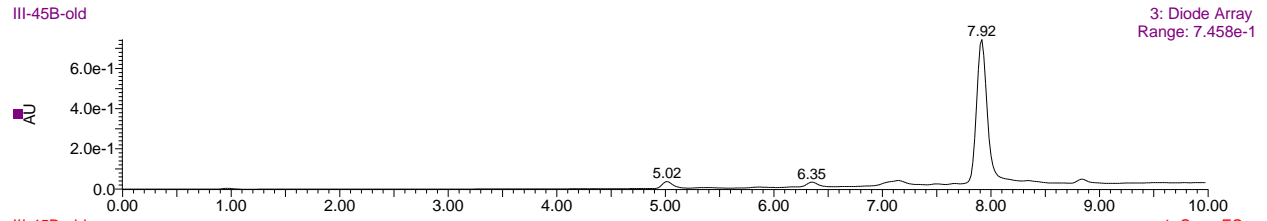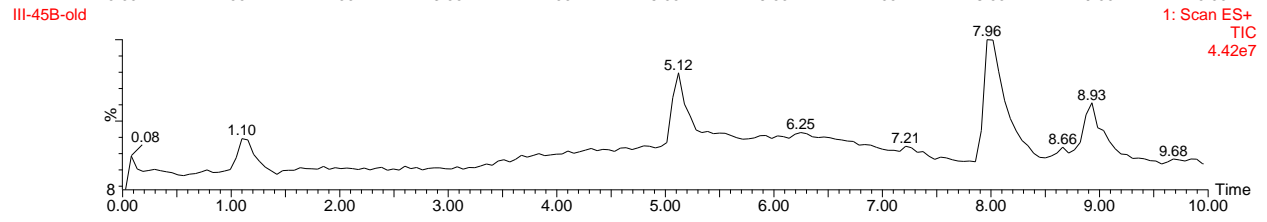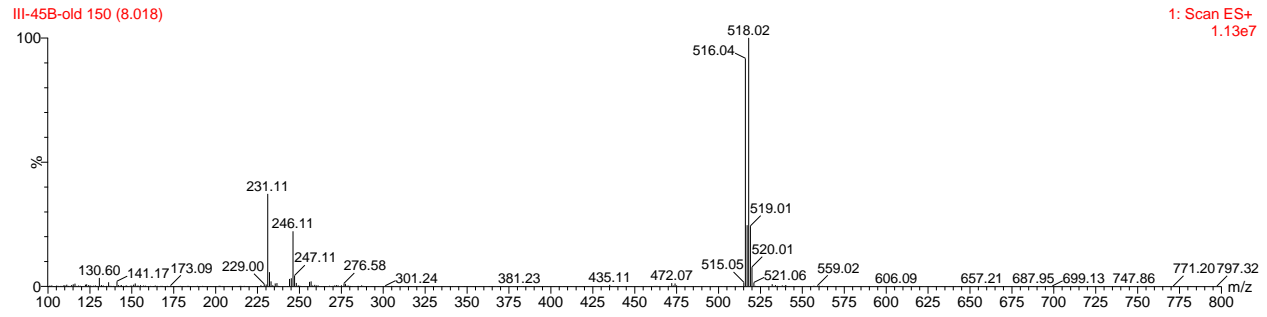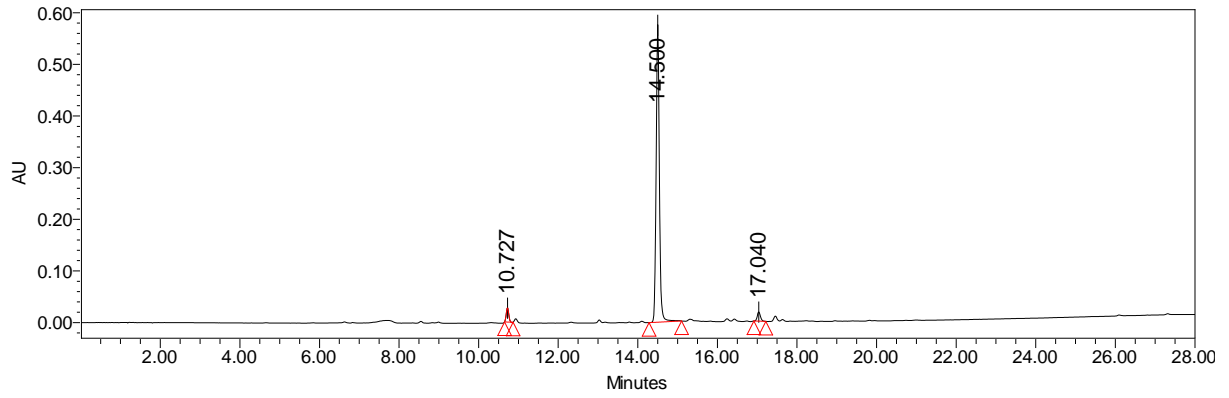

|   | Retention Time | % Area |
|---|----------------|--------|
| 1 | 10.727         | 3.57   |
| 2 | 14.500         | 93.49  |
| 3 | 17.040         | 2.93   |



# 7m

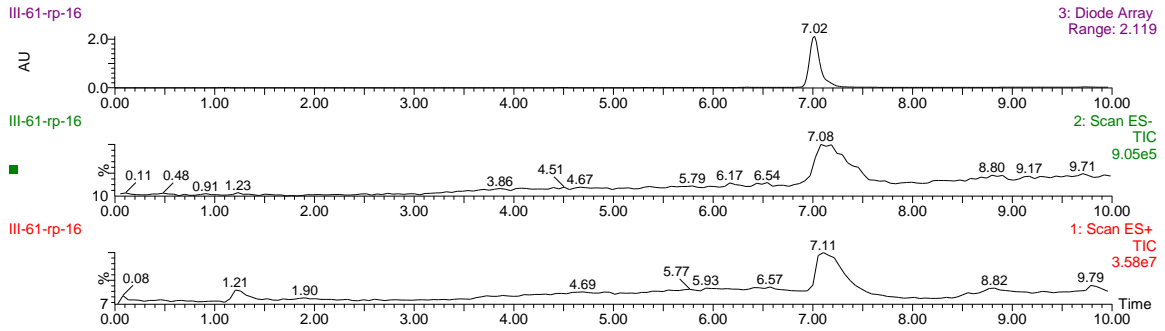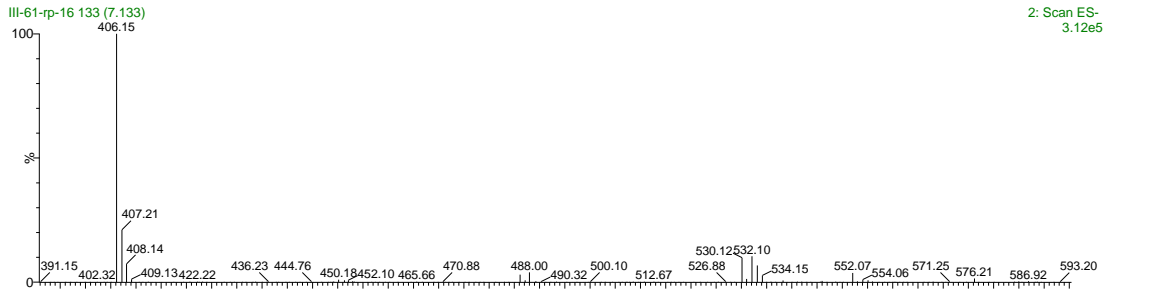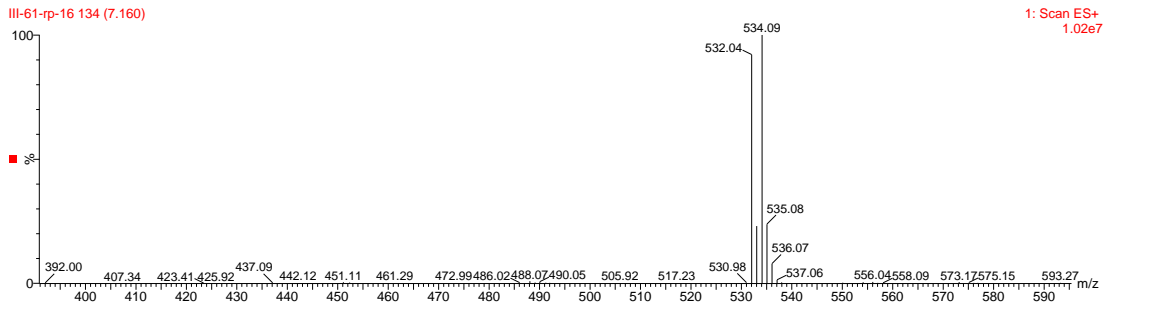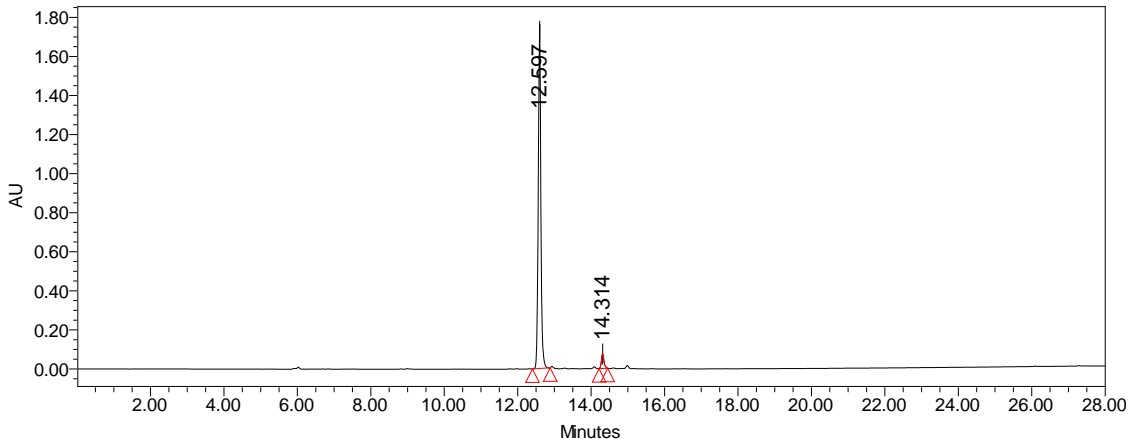

|   | Retention Time | % Area |
|---|----------------|--------|
| 1 | 12.597         | 95.94  |
| 2 | 14.314         | 4.06   |

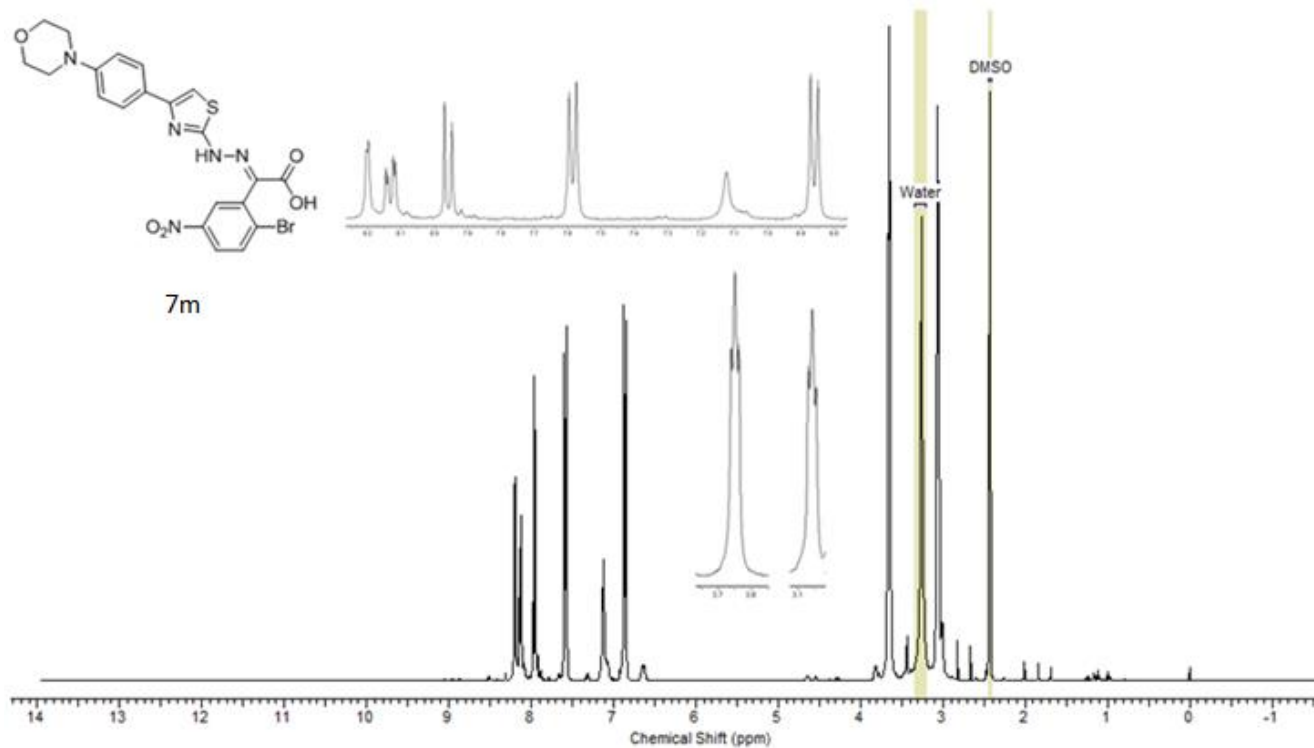

# 7n

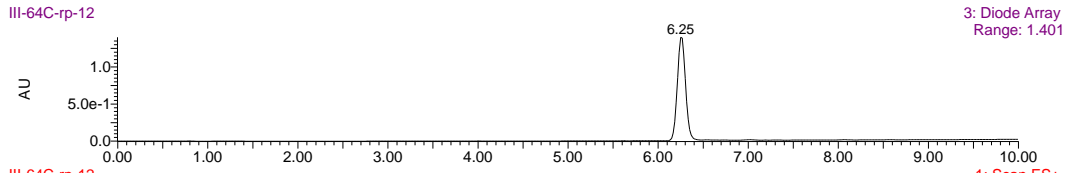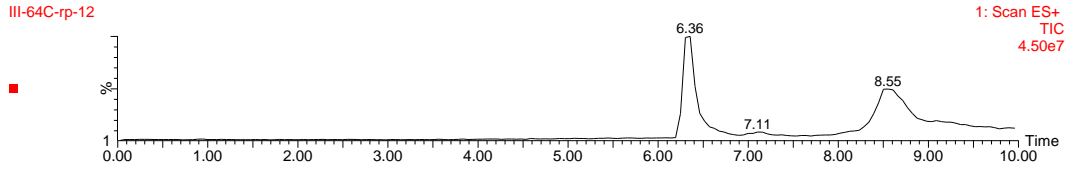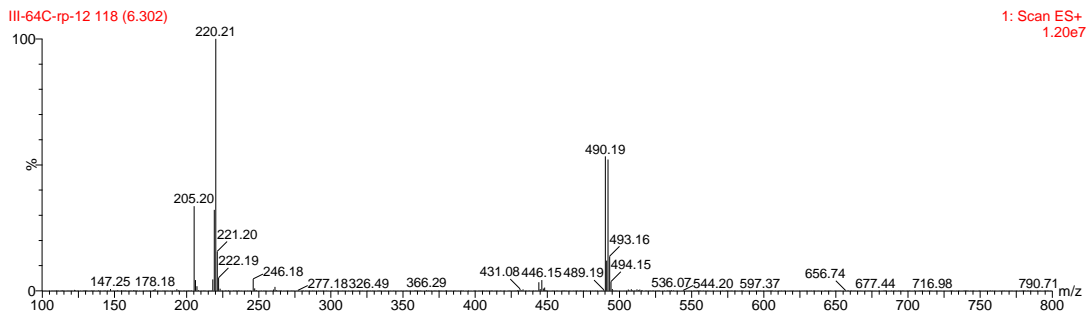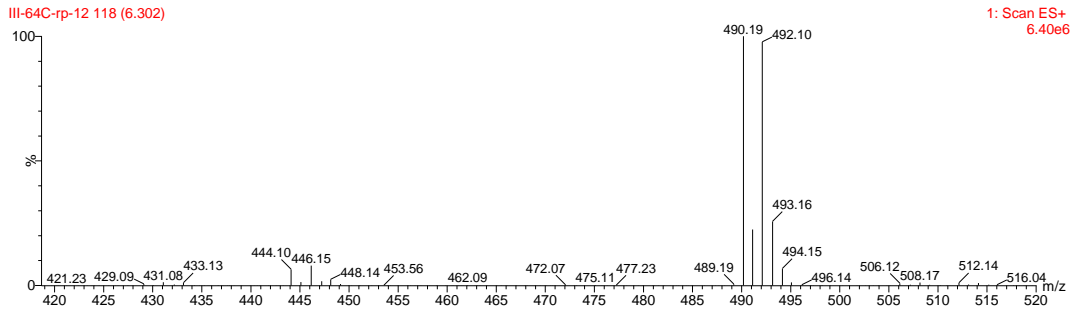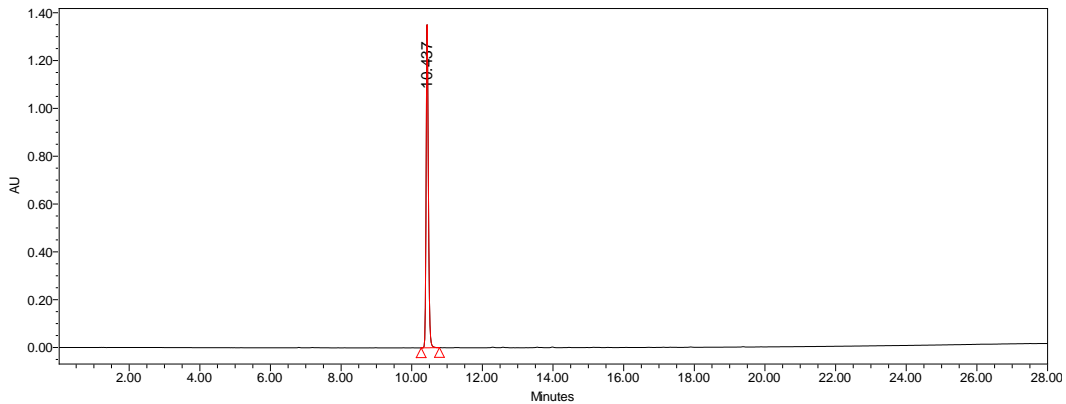

|   | Retention Time | % Area |
|---|----------------|--------|
| 1 | 10.437         | 100.00 |

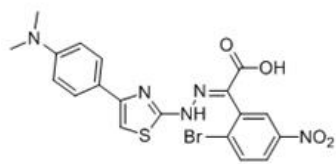

7n

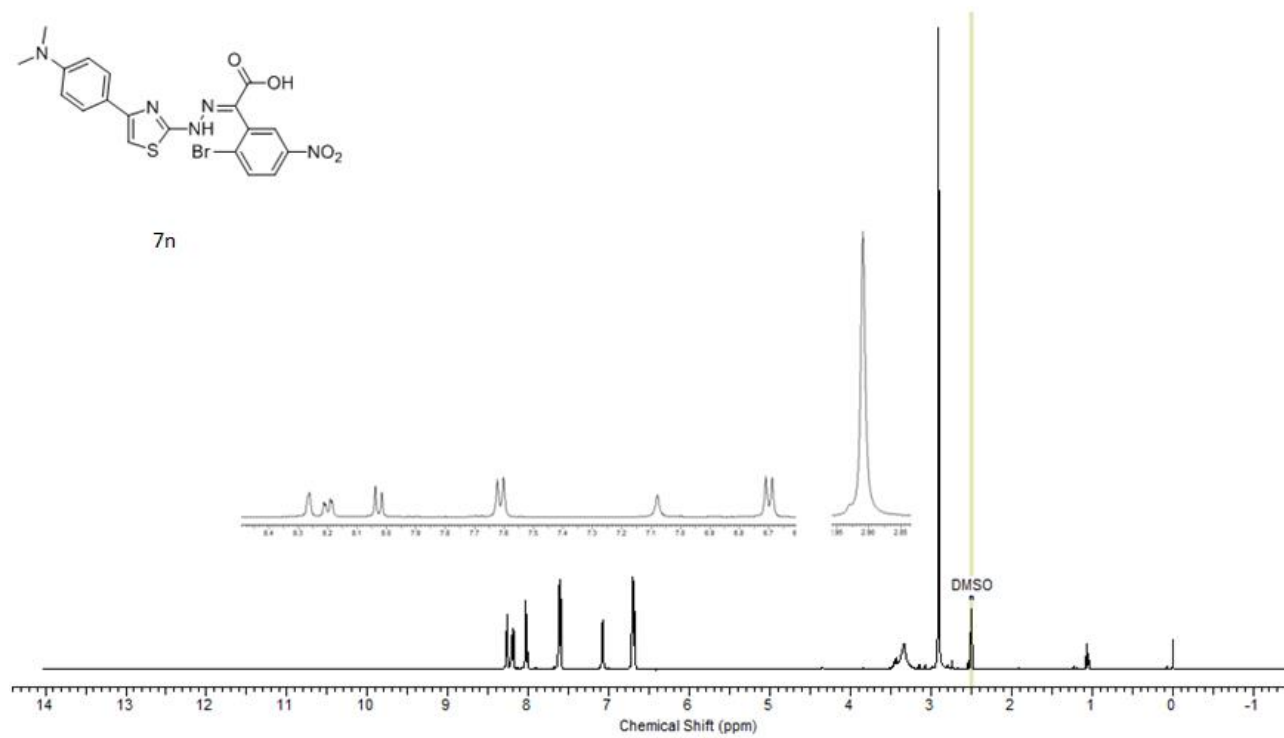

7n

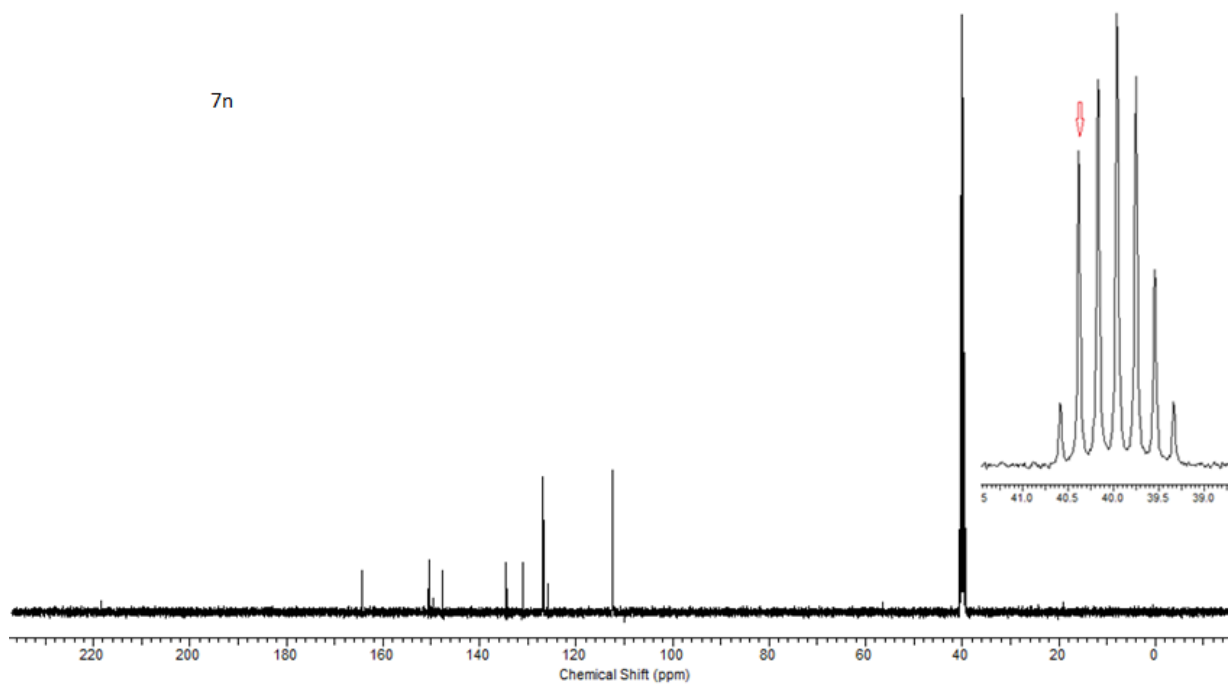

7o

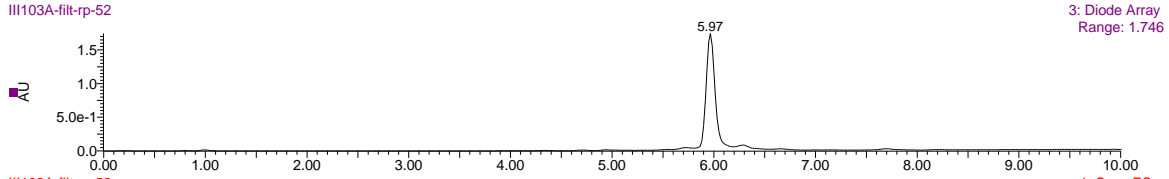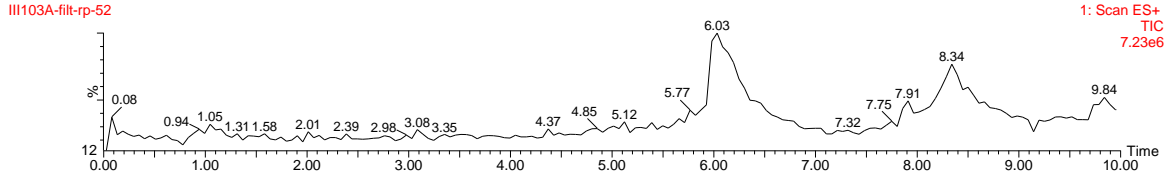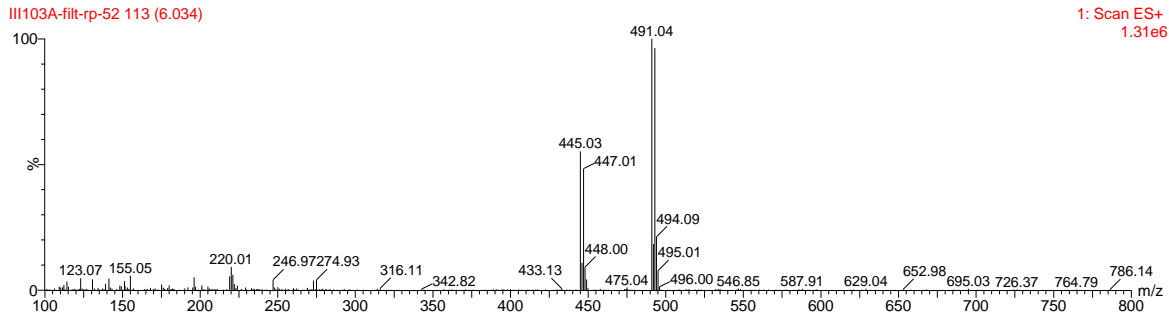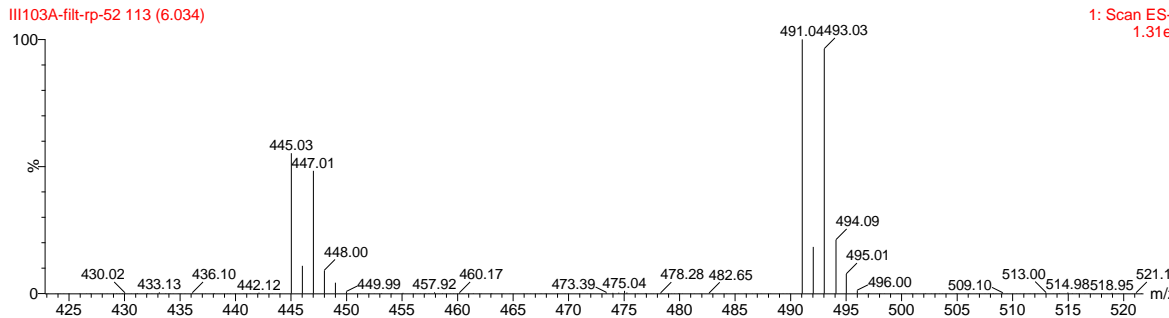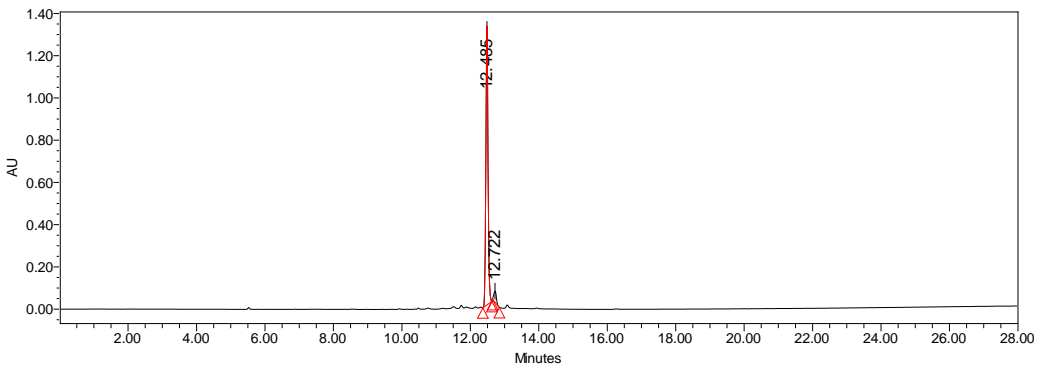

|   | Retention Time | % Area |
|---|----------------|--------|
| 1 | 12.485         | 95.47  |
| 2 | 12.722         | 4.53   |



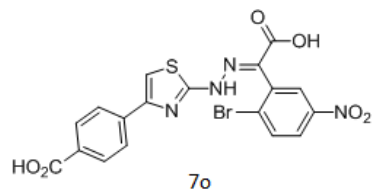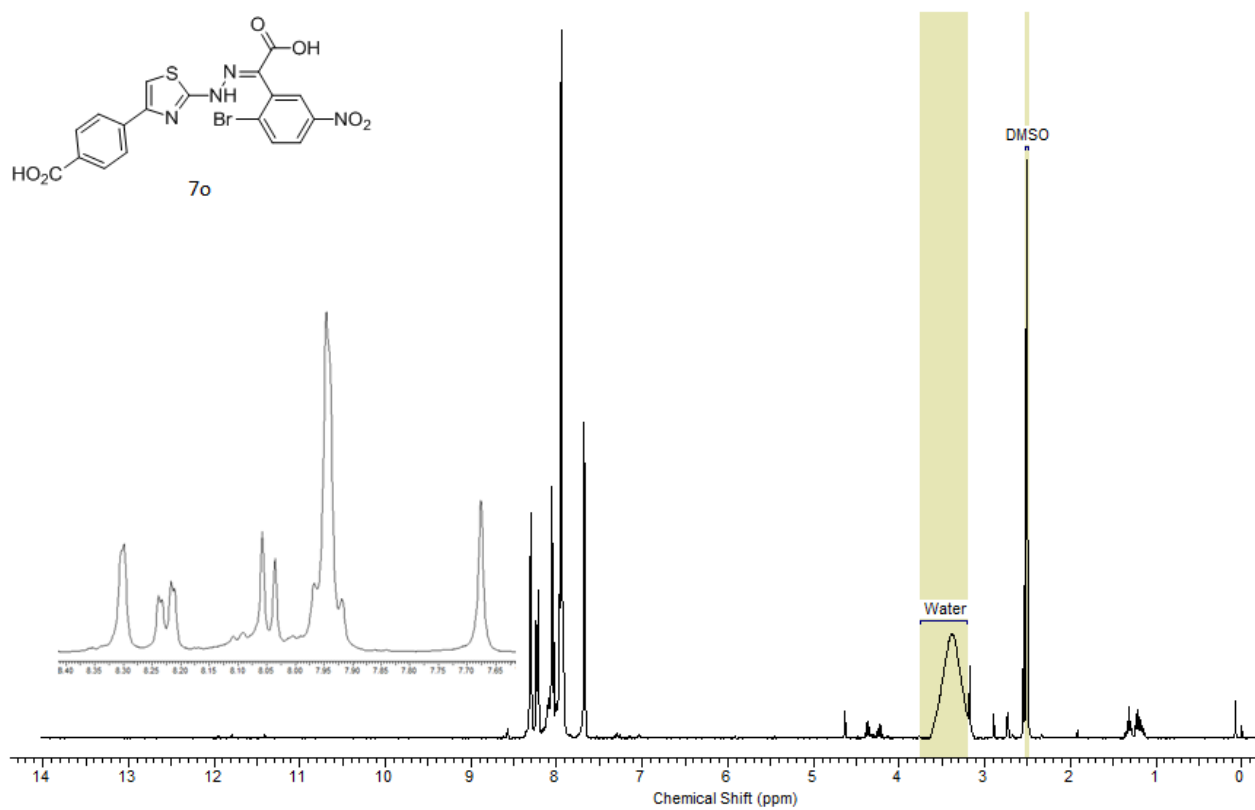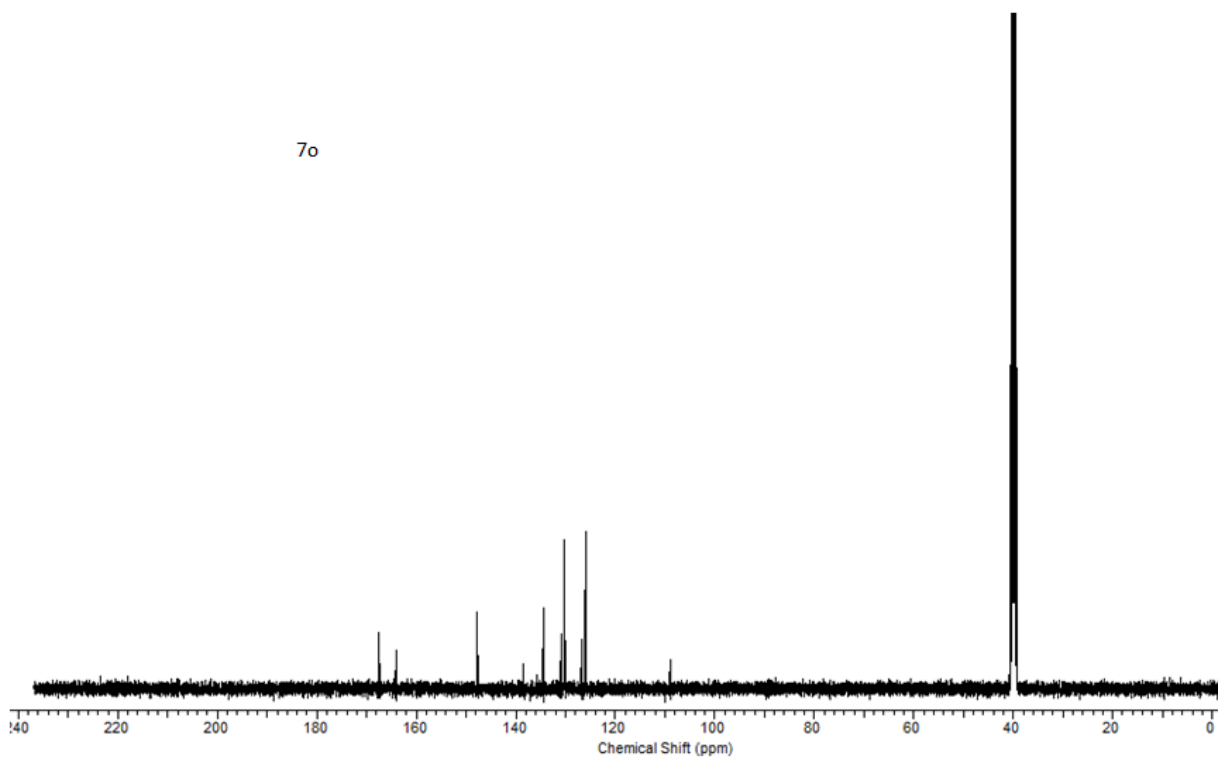

7p

III-109-precip

3: Diode Array  
Range: 3.468

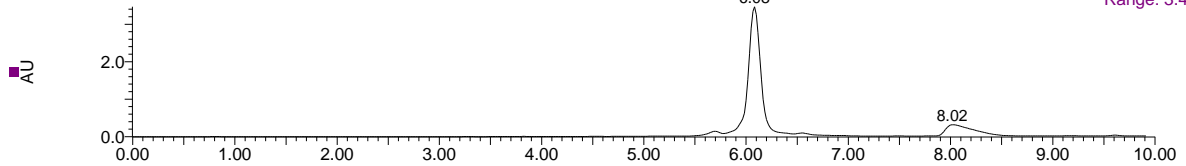

III-109-precip

1: Scan ES+  
TIC  
3.67e7

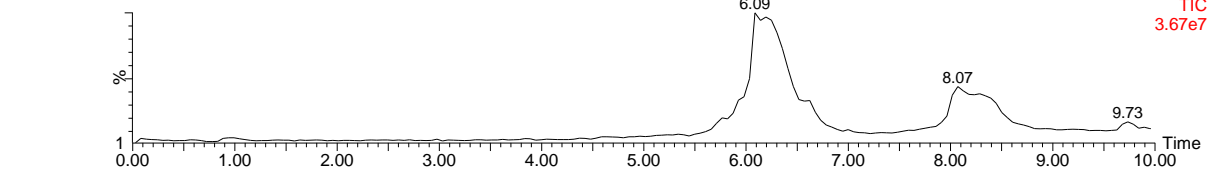

III-109-precip 152 (8.125)

1: Scan ES+  
1.99e6

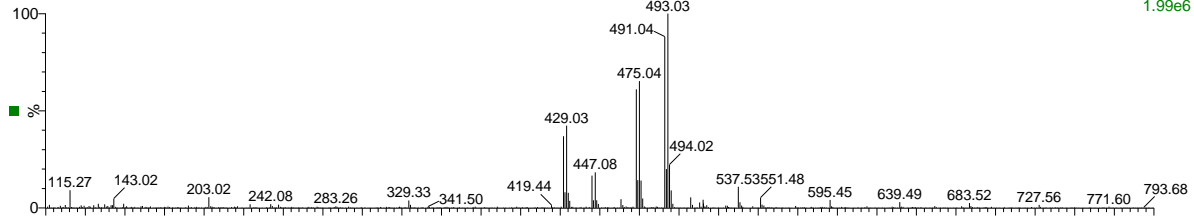

III-109-precip 118 (6.302)

1: Scan ES+  
4.07e6

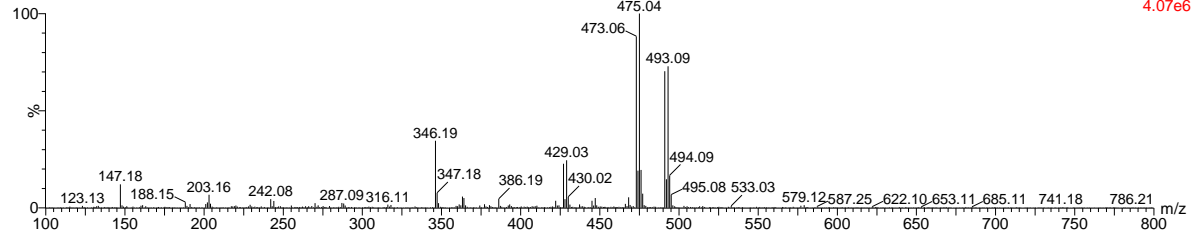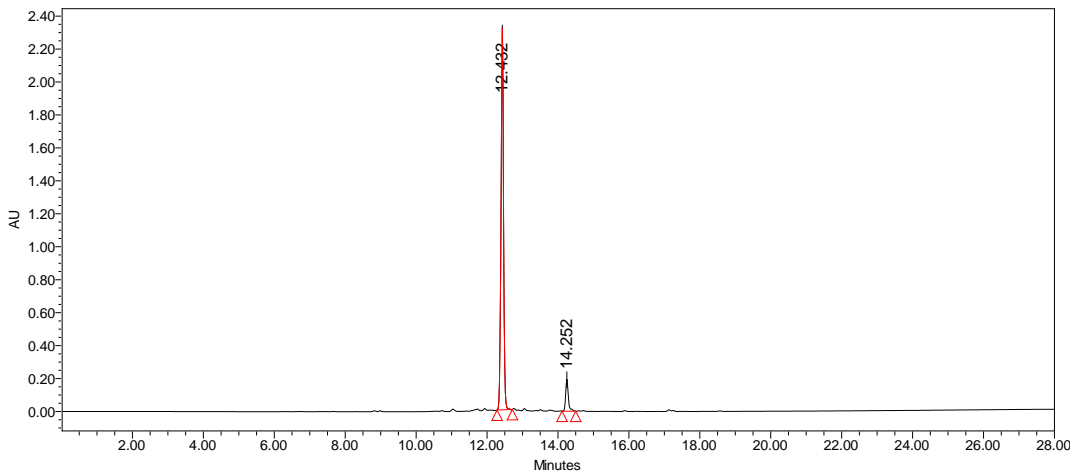

|   | Retention Time | % Area |
|---|----------------|--------|
| 1 | 12.432         | 91.84  |
| 2 | 14.252         | 8.16   |

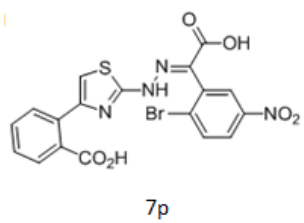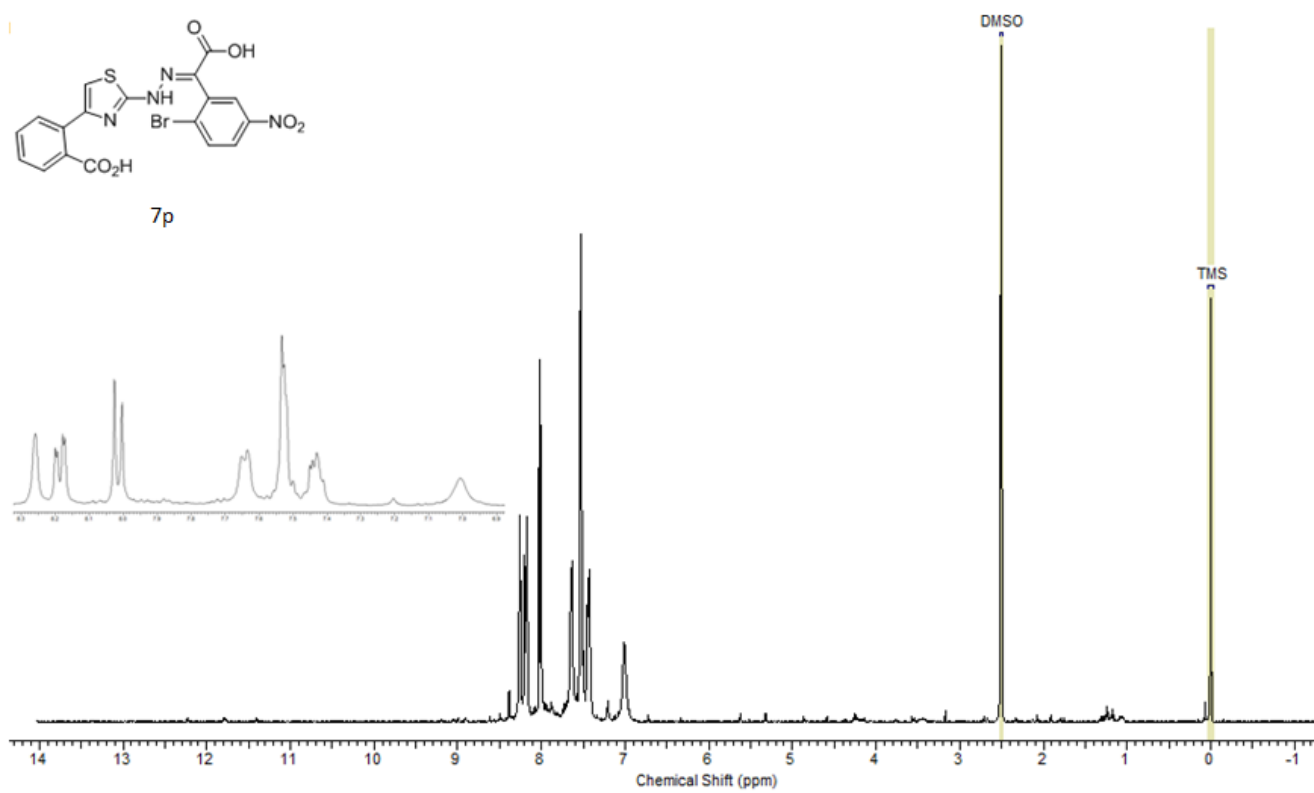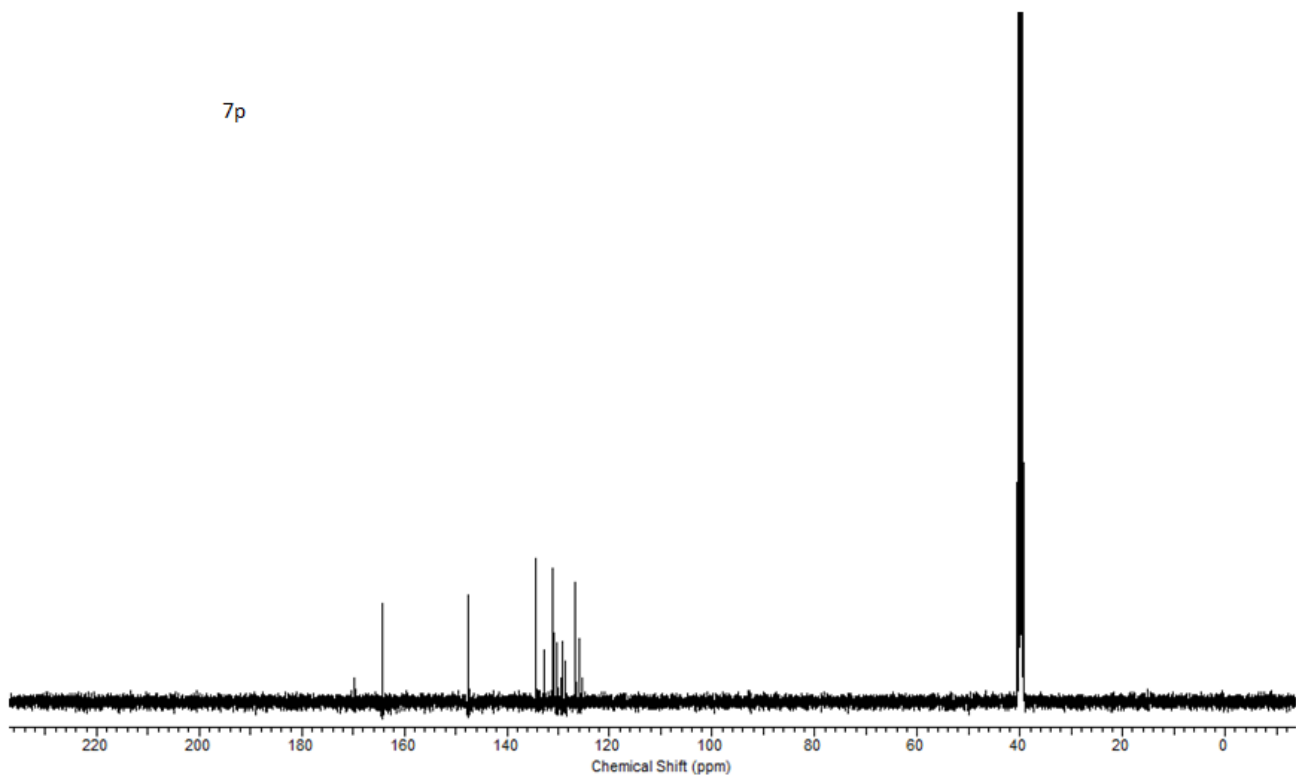

7q

III-99BfromIII98A-filt-rp-35

3: Diode Array  
Range: 2.629

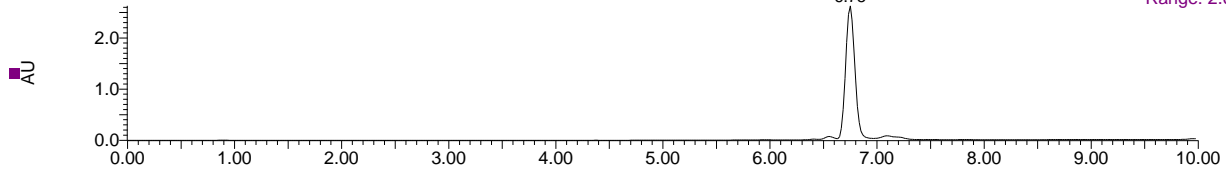

III-99BfromIII98A-filt-rp-35

1: Scan ES+  
TIC  
1.07e7

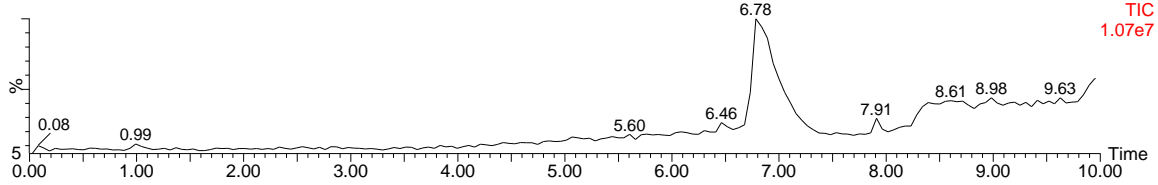

III-99BfromIII98A-filt-rp-35 127 (6.784)

1: Scan ES+  
2.13e6

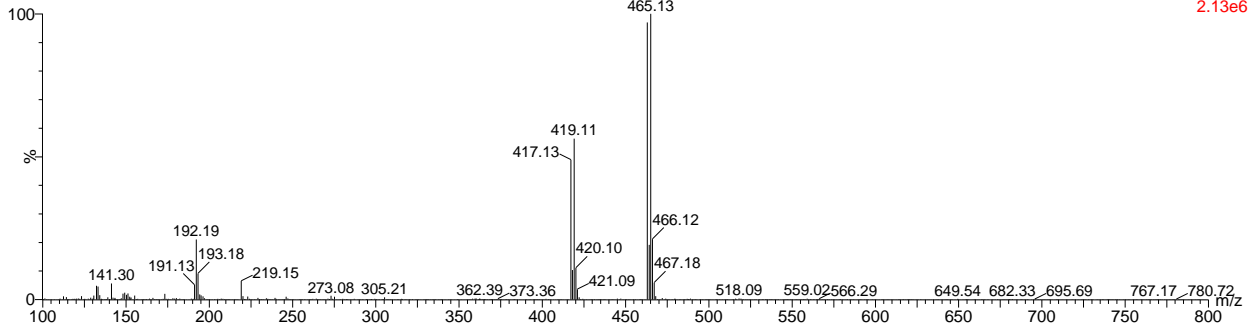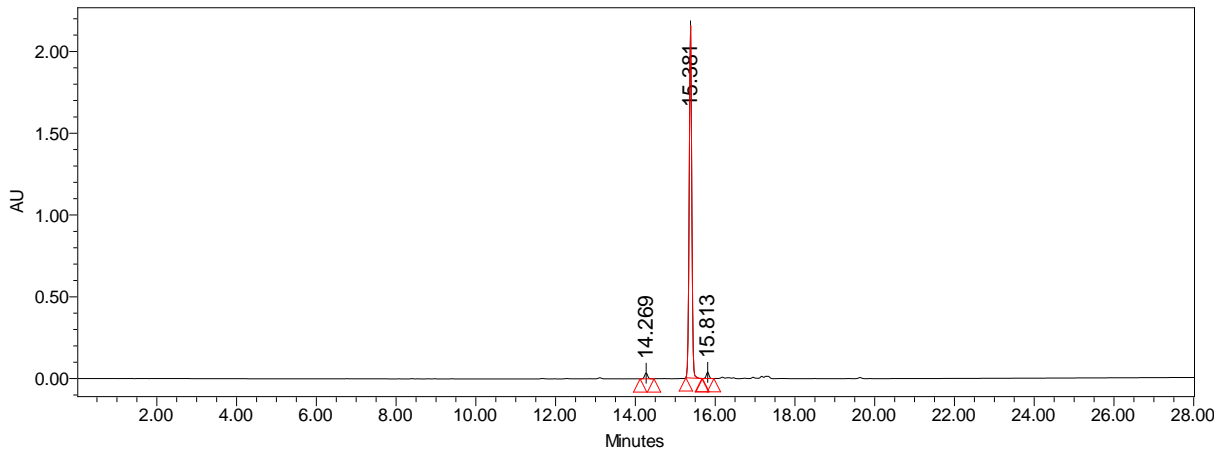

|   | Retention Time | % Area |
|---|----------------|--------|
| 1 | 14.269         | 1.87   |
| 2 | 15.381         | 96.30  |
| 3 | 15.813         | 1.83   |

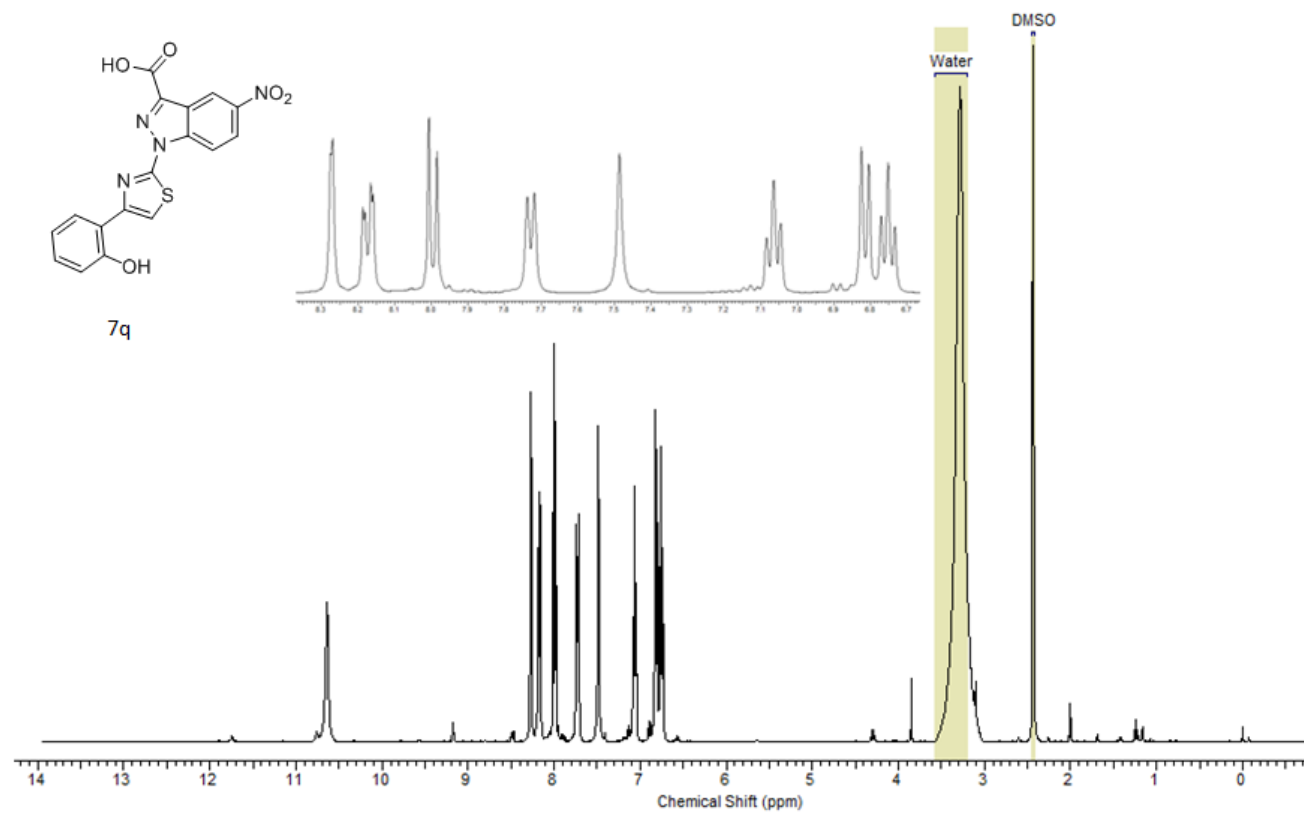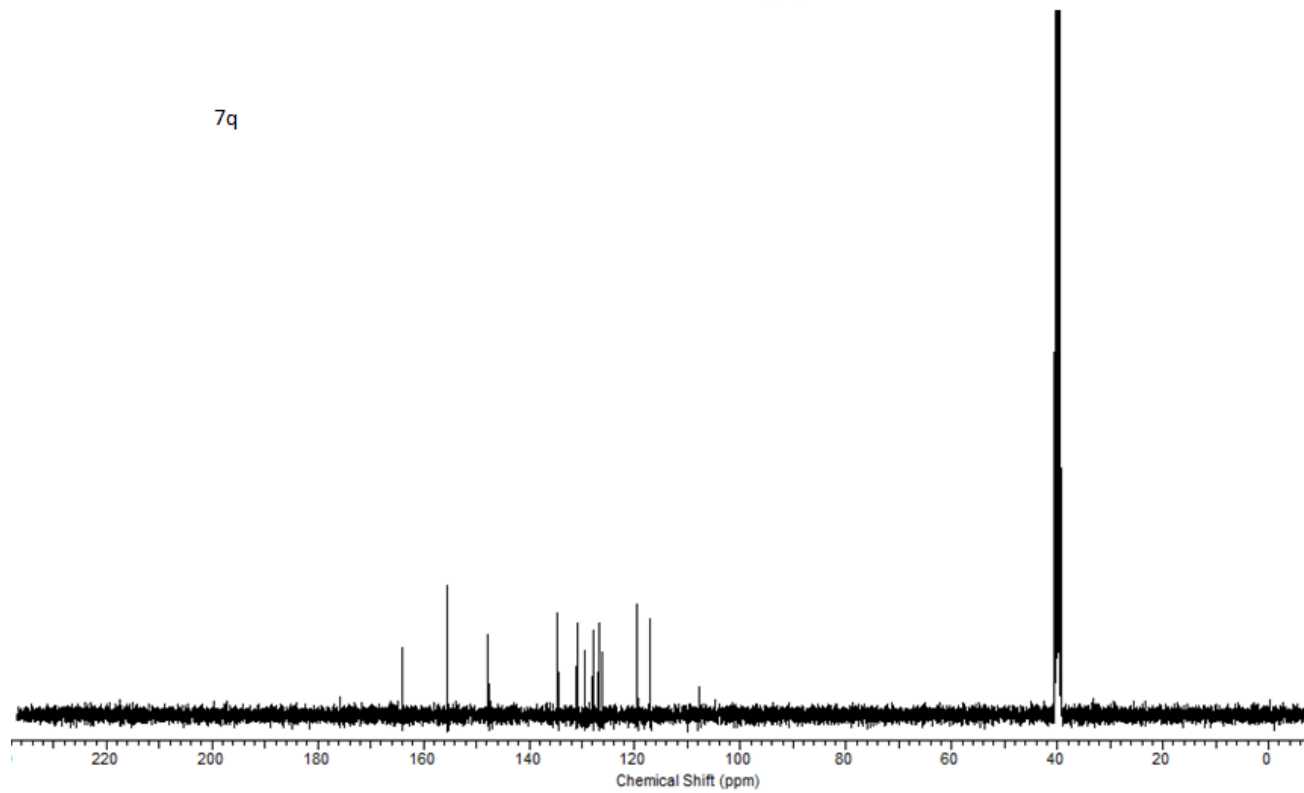

7r

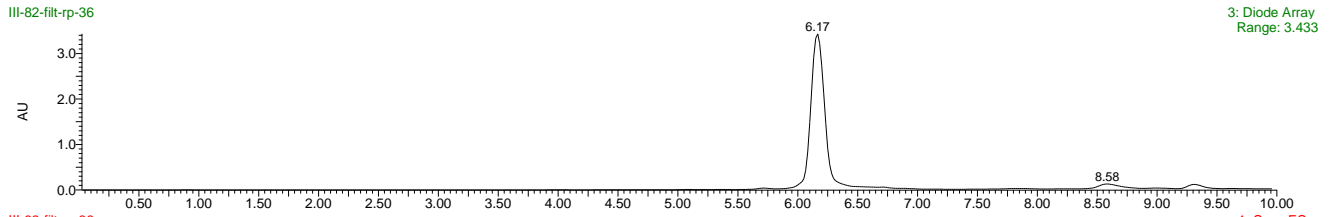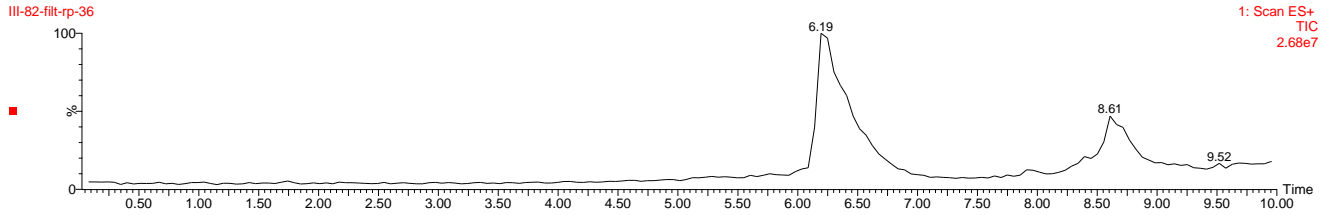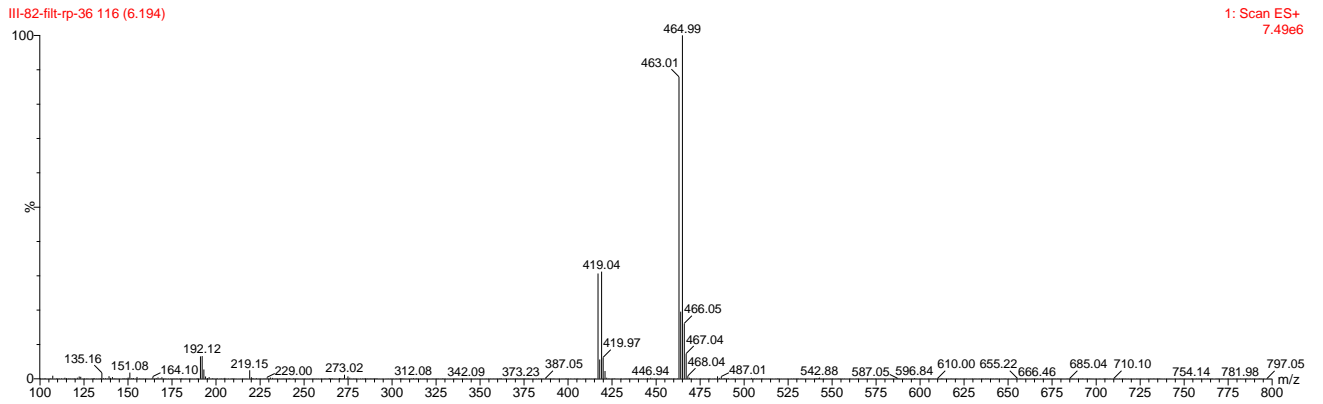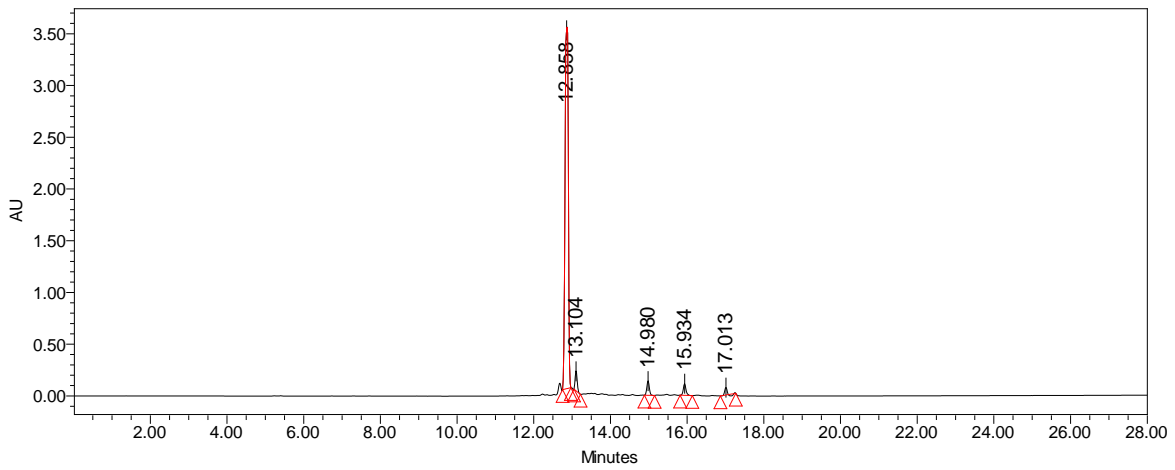

|   | Retention Time | % Area |
|---|----------------|--------|
| 1 | 12.858         | 89.97  |
| 2 | 13.104         | 3.12   |
| 3 | 14.980         | 2.71   |
| 4 | 15.934         | 2.34   |
| 5 | 17.013         | 1.86   |

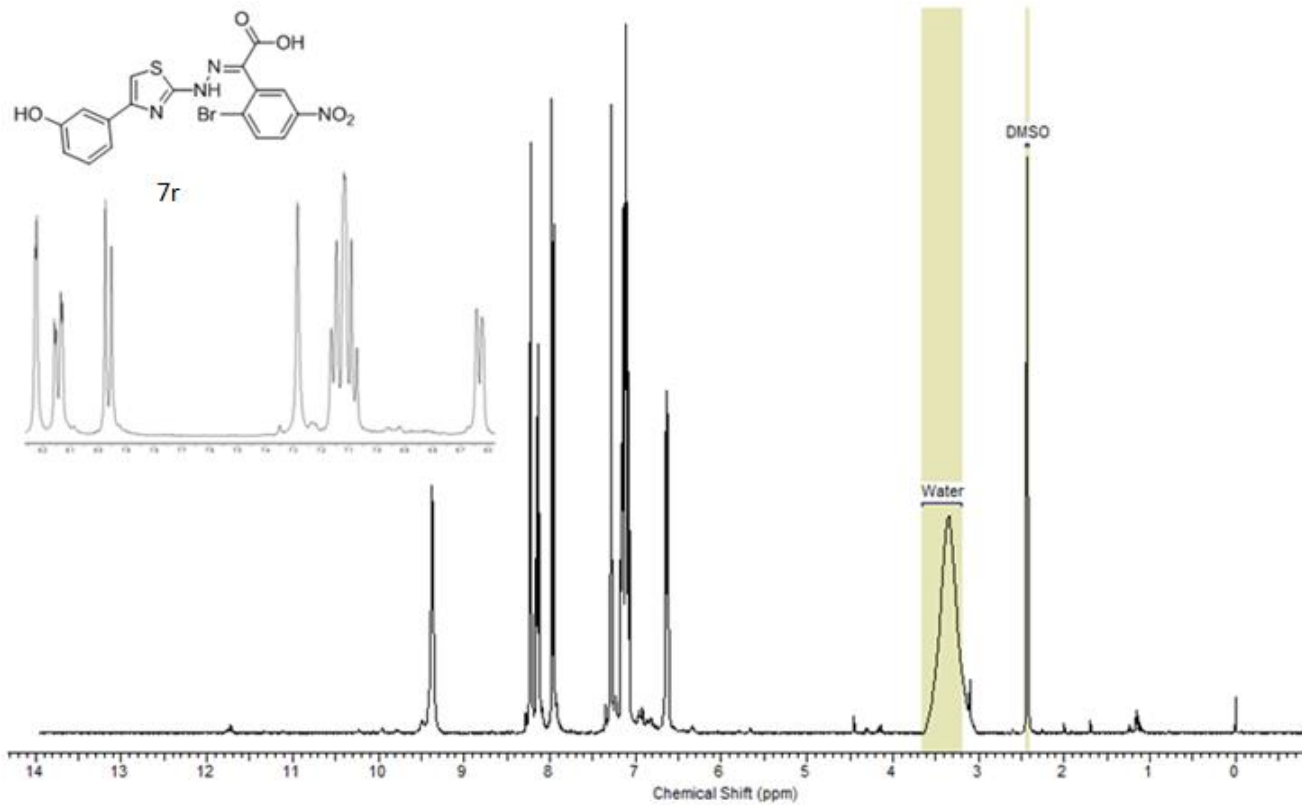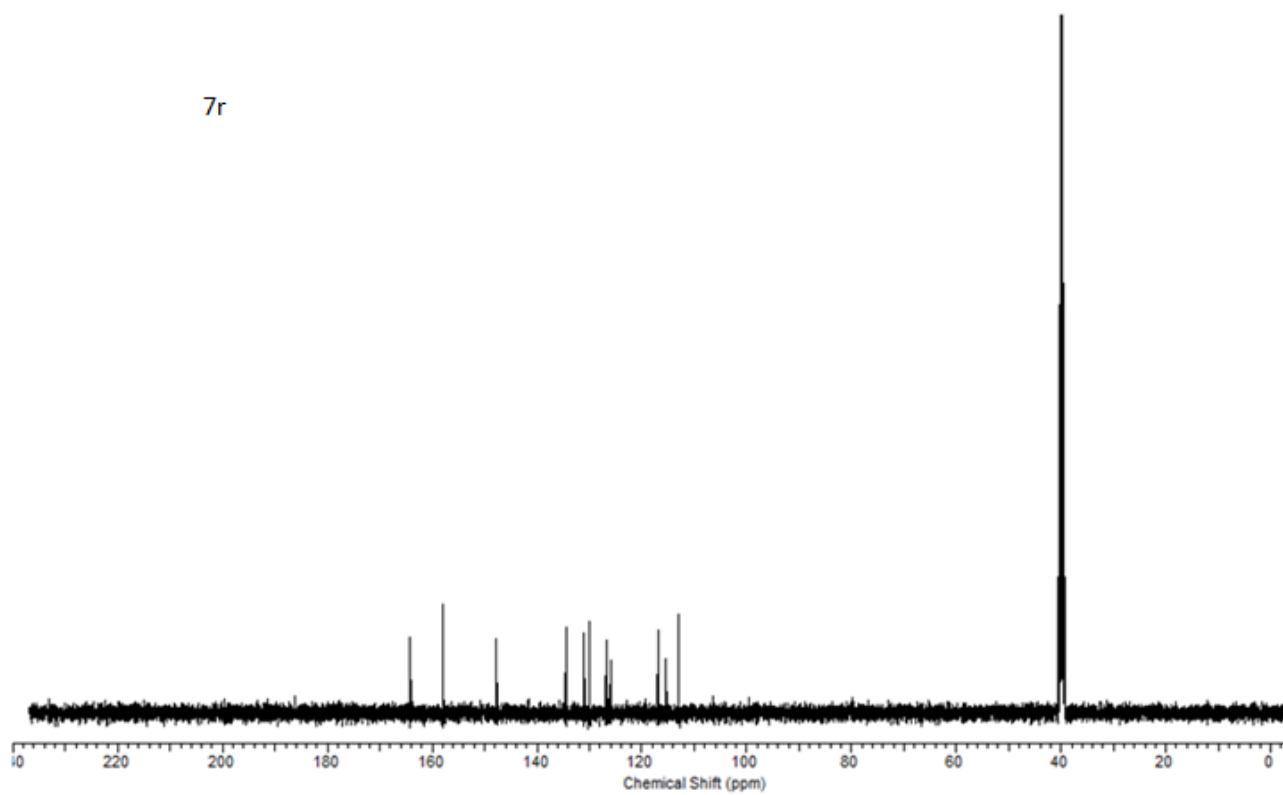

7s

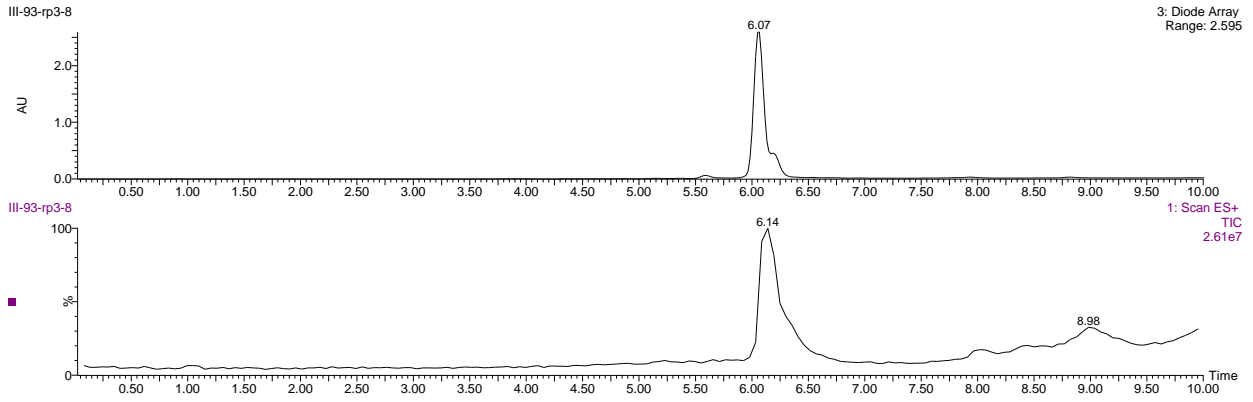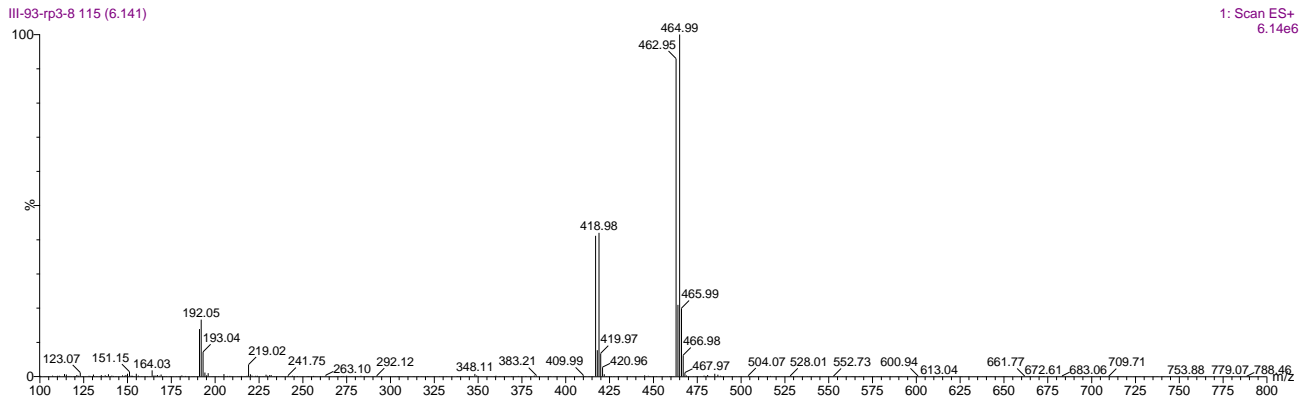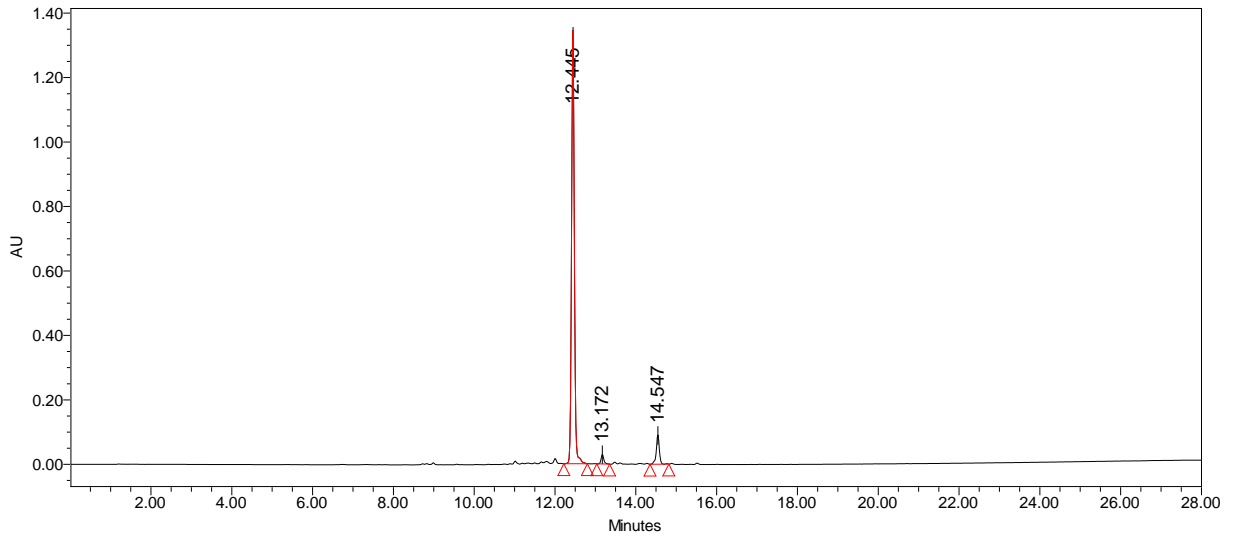

|   | Retention Time | % Area |
|---|----------------|--------|
| 1 | 12.445         | 91.32  |
| 2 | 13.172         | 1.95   |
| 3 | 14.547         | 6.73   |



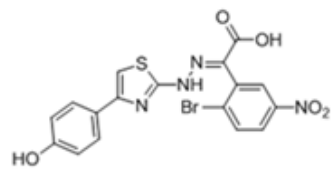

7s

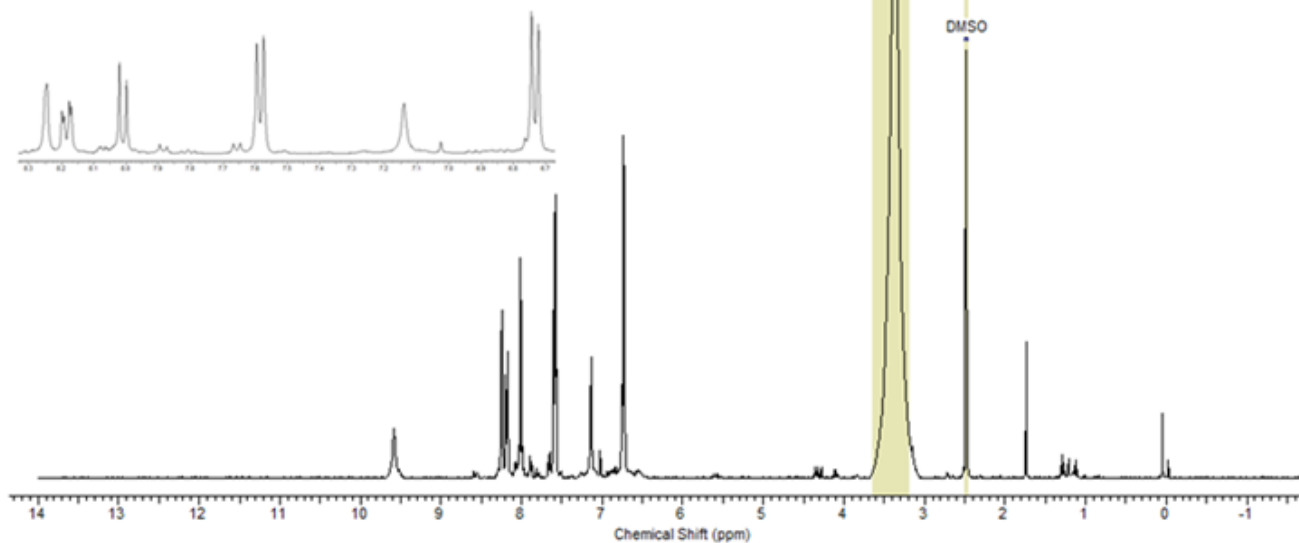

7s

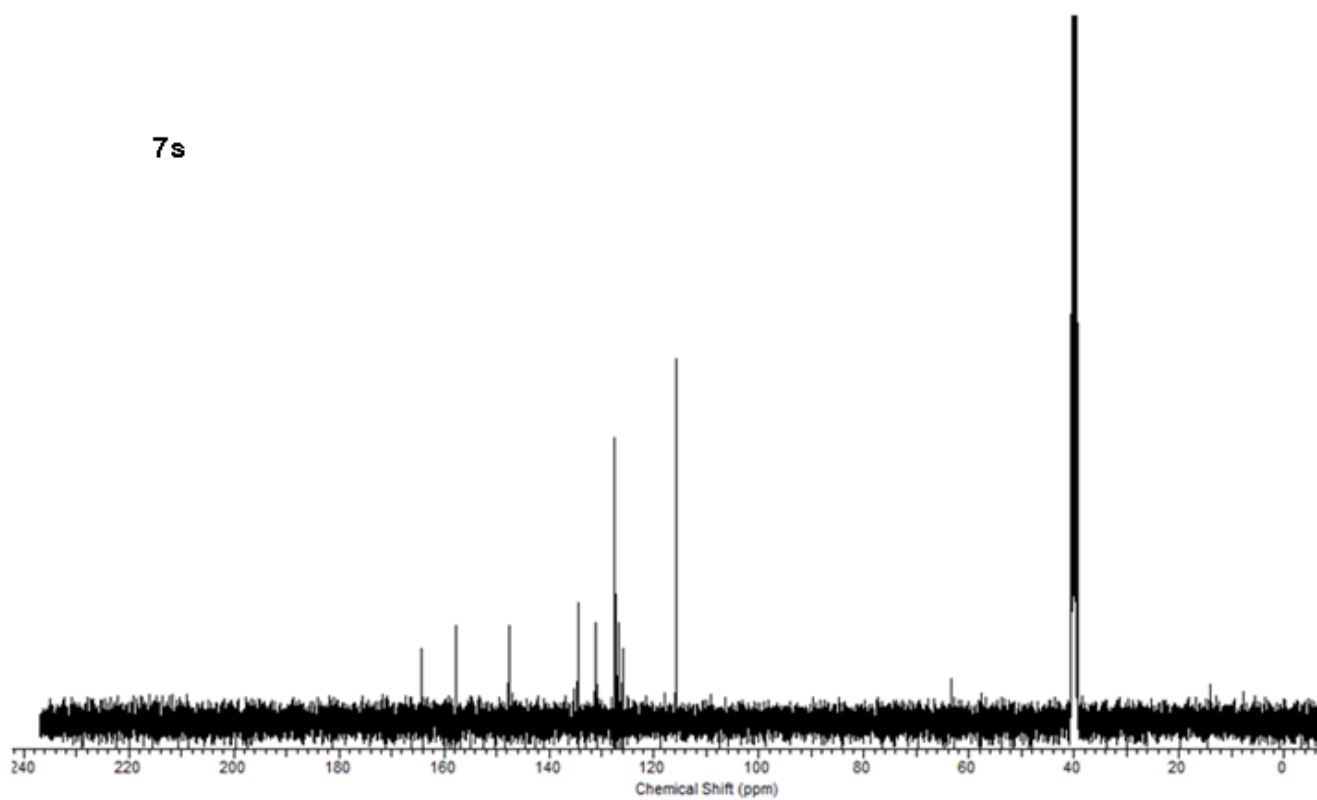

7t

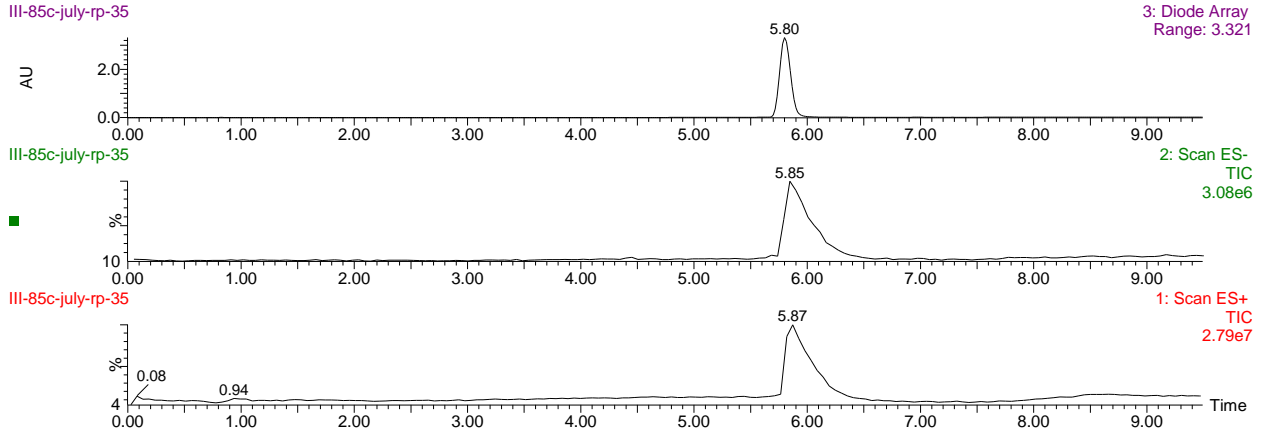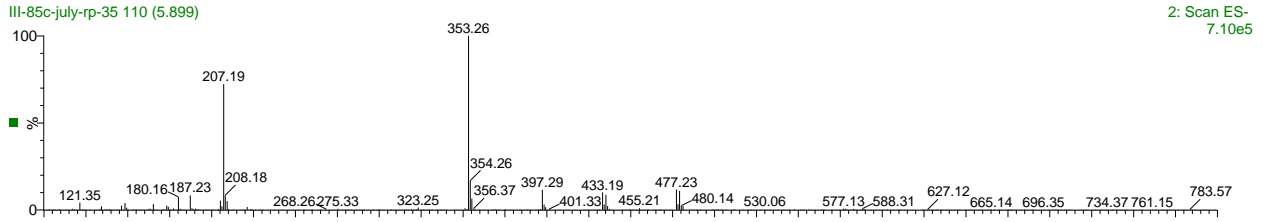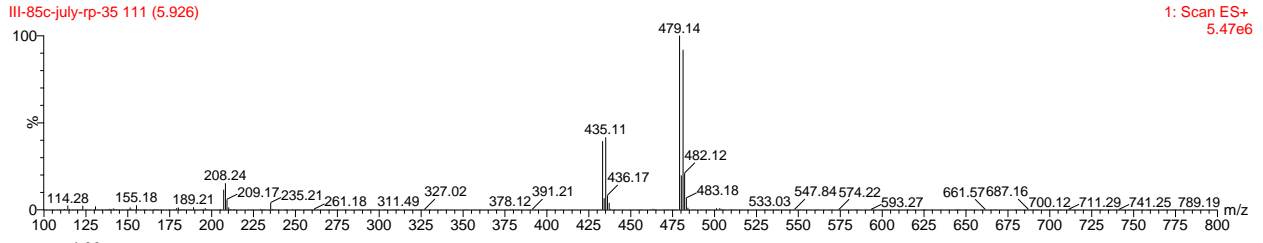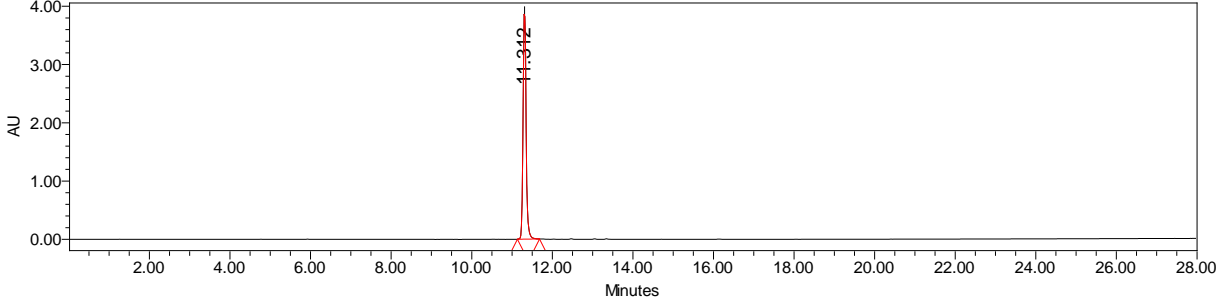

|   | Retention Time | % Area |
|---|----------------|--------|
| 1 | 11.312         | 100.00 |

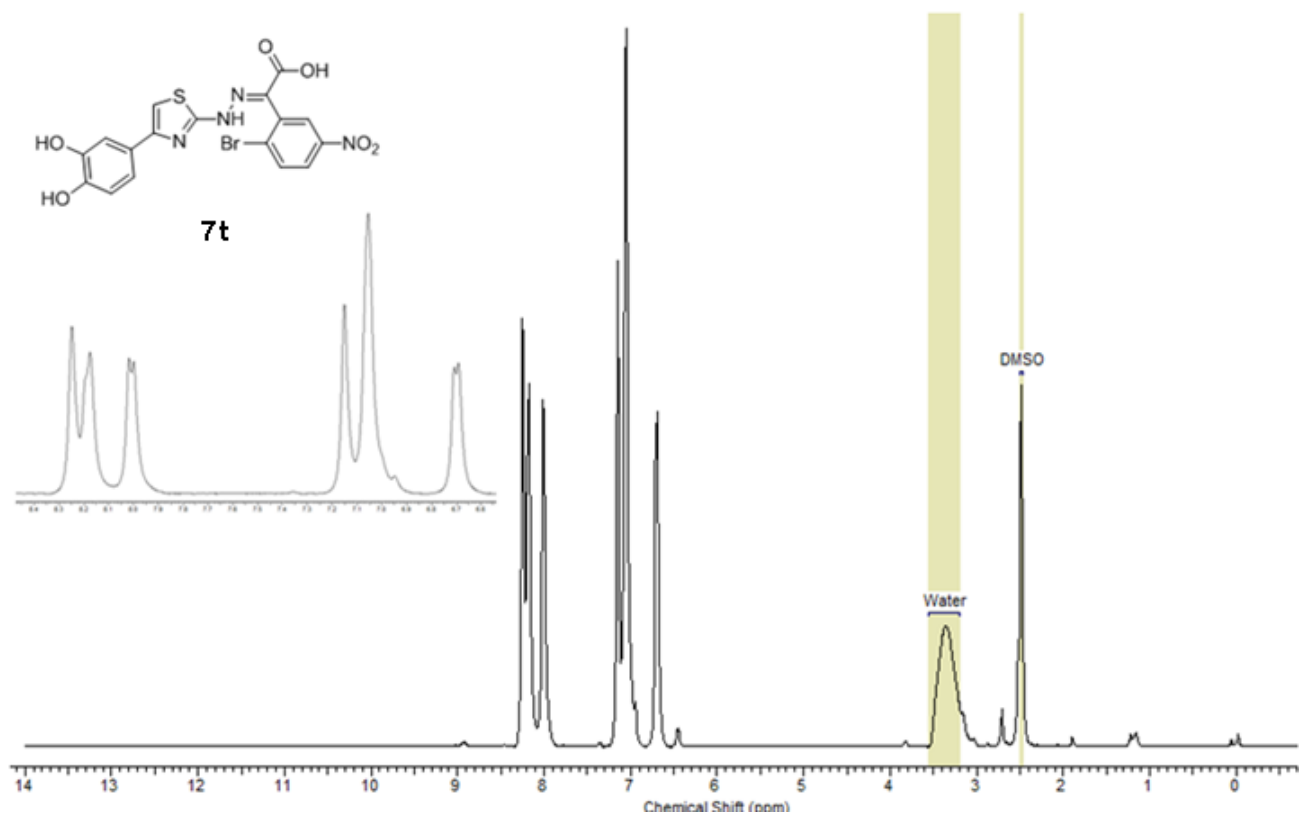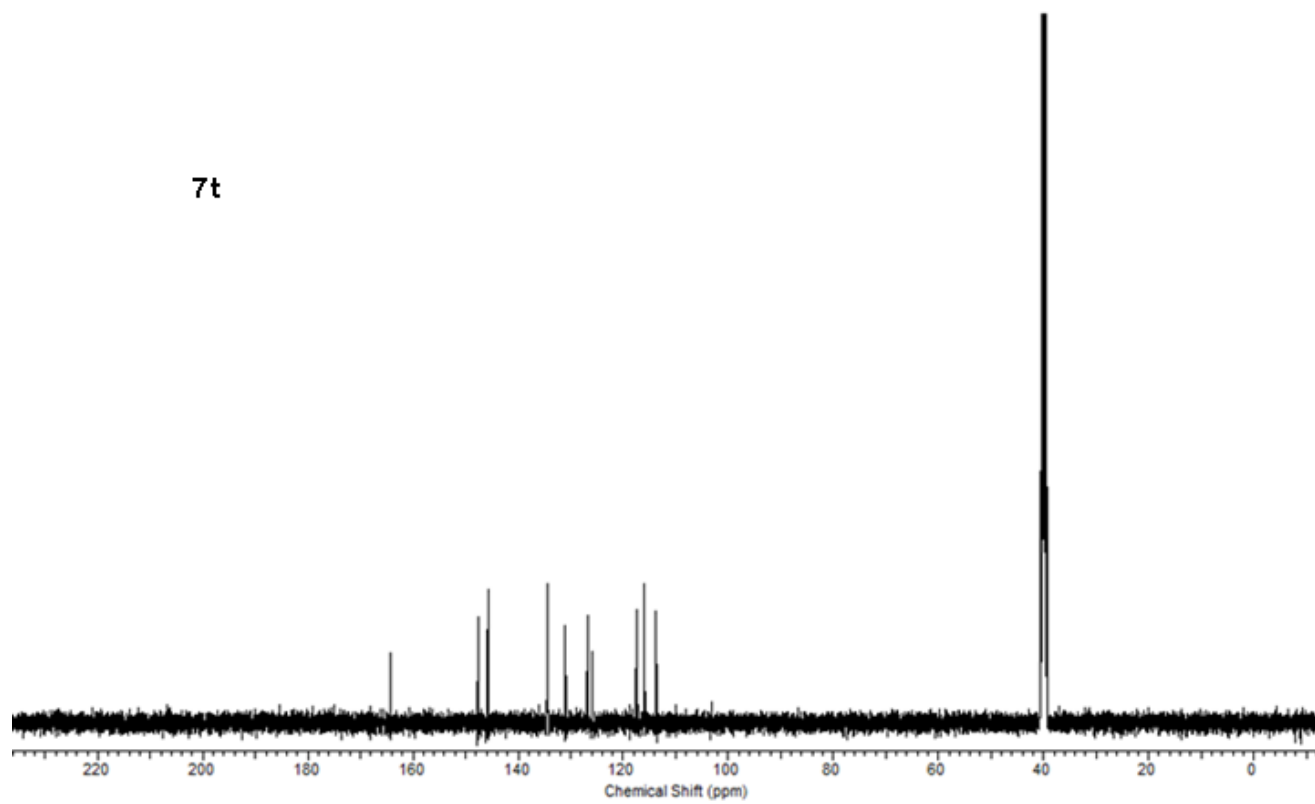

7u

III-126C-400b

3: Diode Array  
Range: 3.467

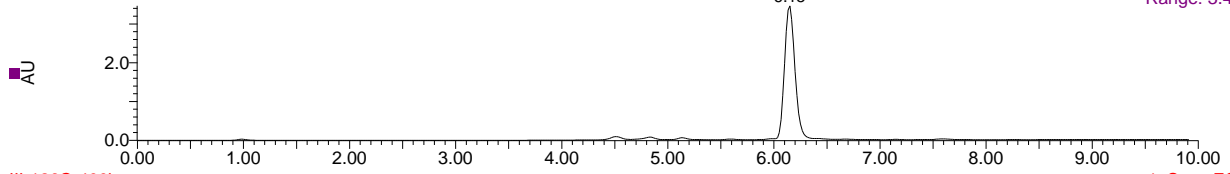

III-126C-400b

1: Scan ES+  
TIC  
1.27e8

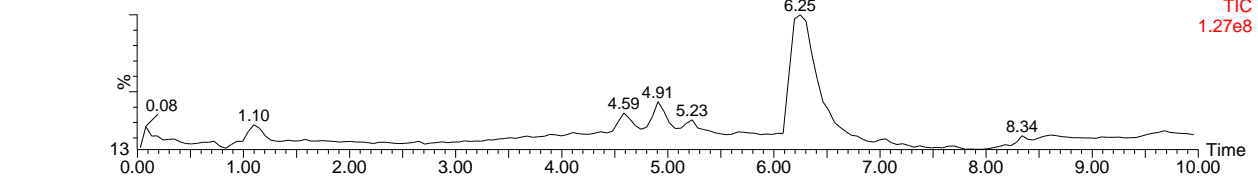

III-126C-400b 117 (6.248)

1: Scan ES+  
4.51e7

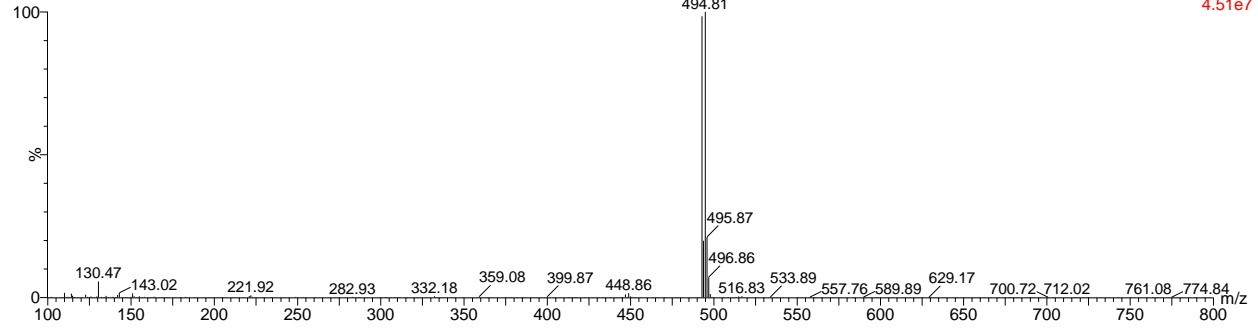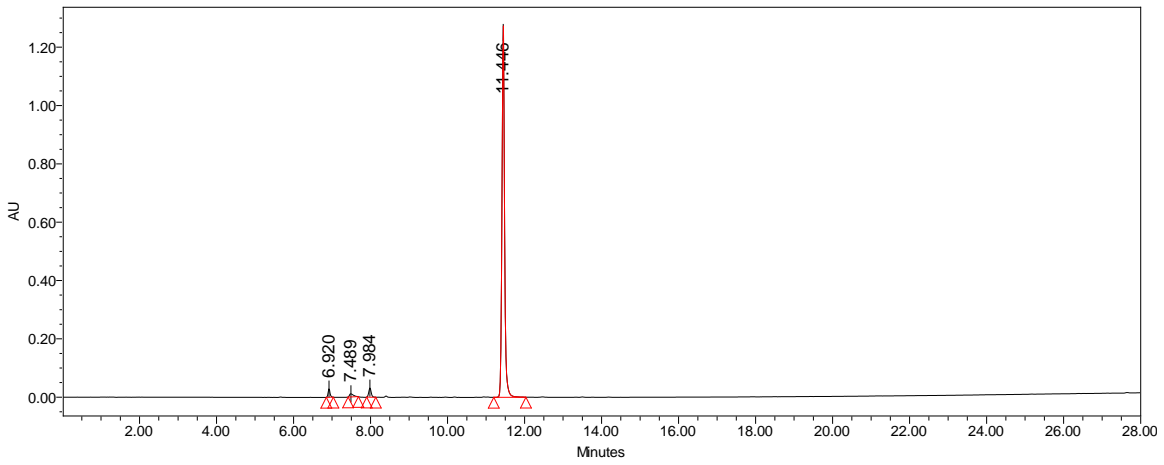

| Retention Time | % Area |
|----------------|--------|
| 6.920          | 1.61   |
| 7.489          | 1.17   |
| 7.984          | 2.12   |
| 11.446         | 95.10  |

7u

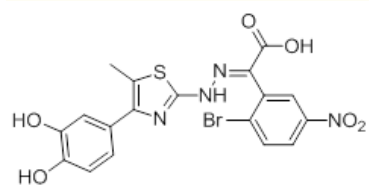

7u

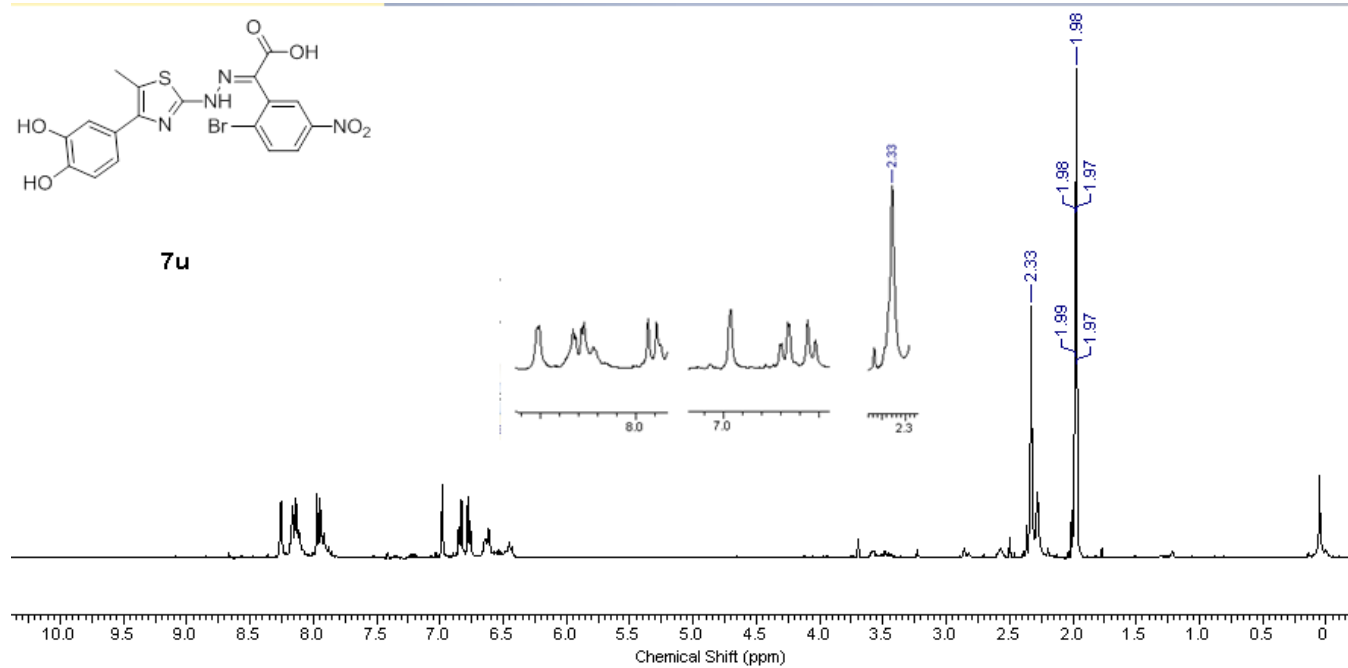

7u

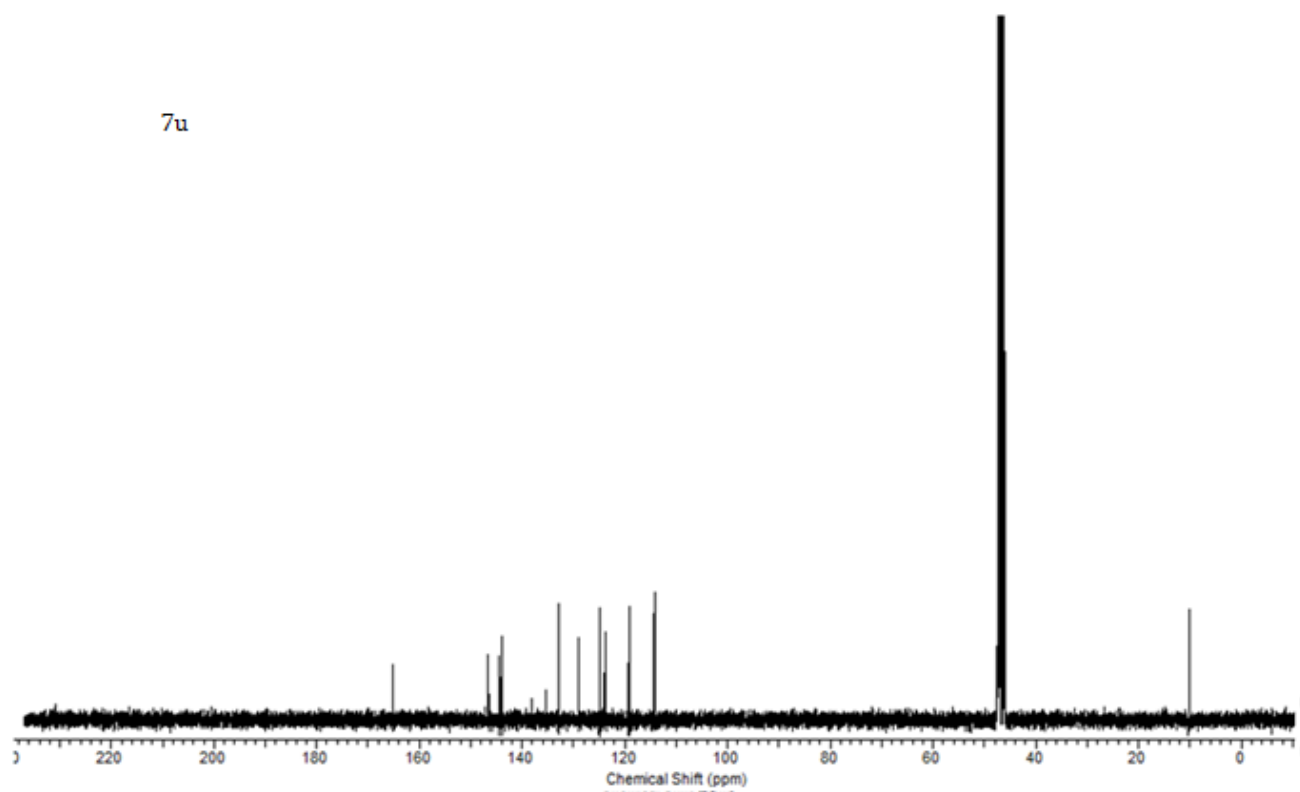

# 5a

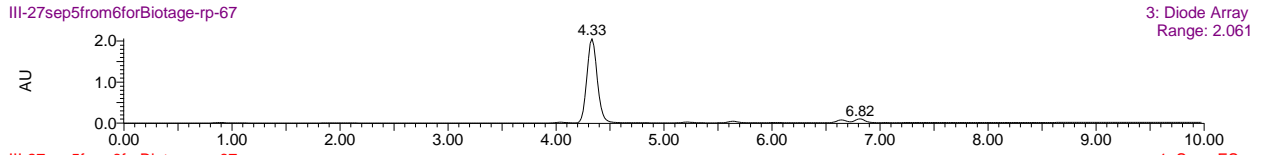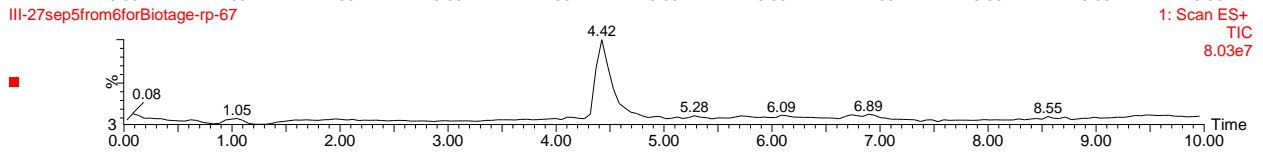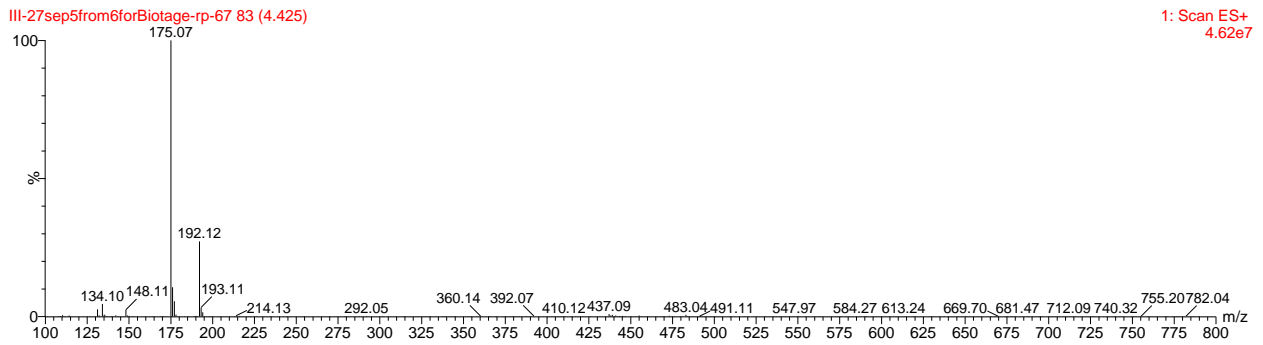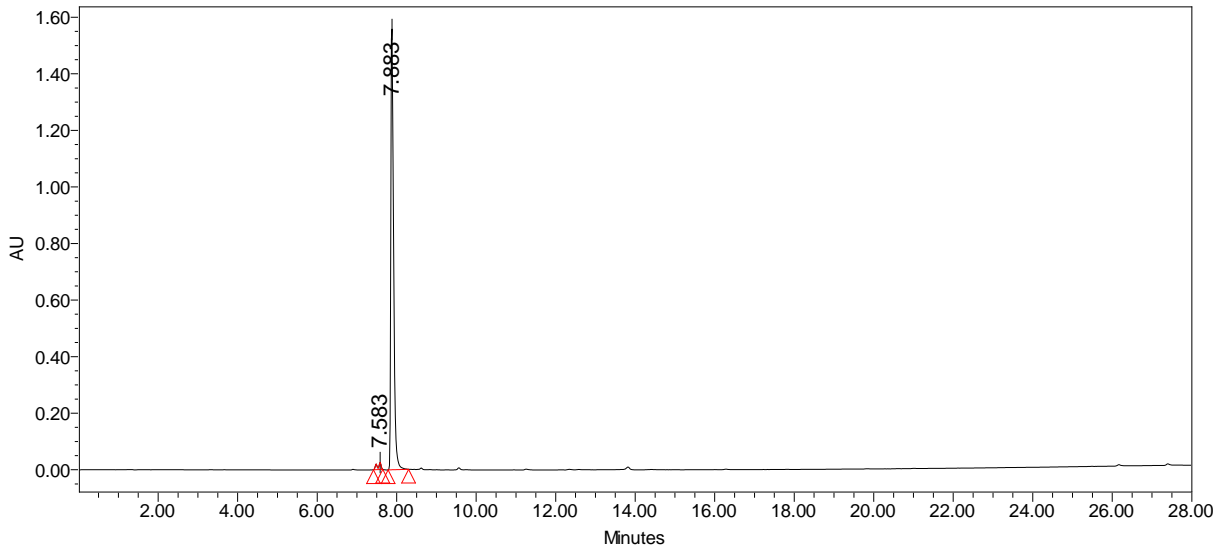

|   | Retention Time | % Area |
|---|----------------|--------|
| 1 | 7.583          | 1.99   |
| 2 | 7.883          | 98.01  |

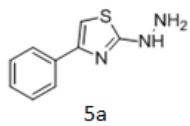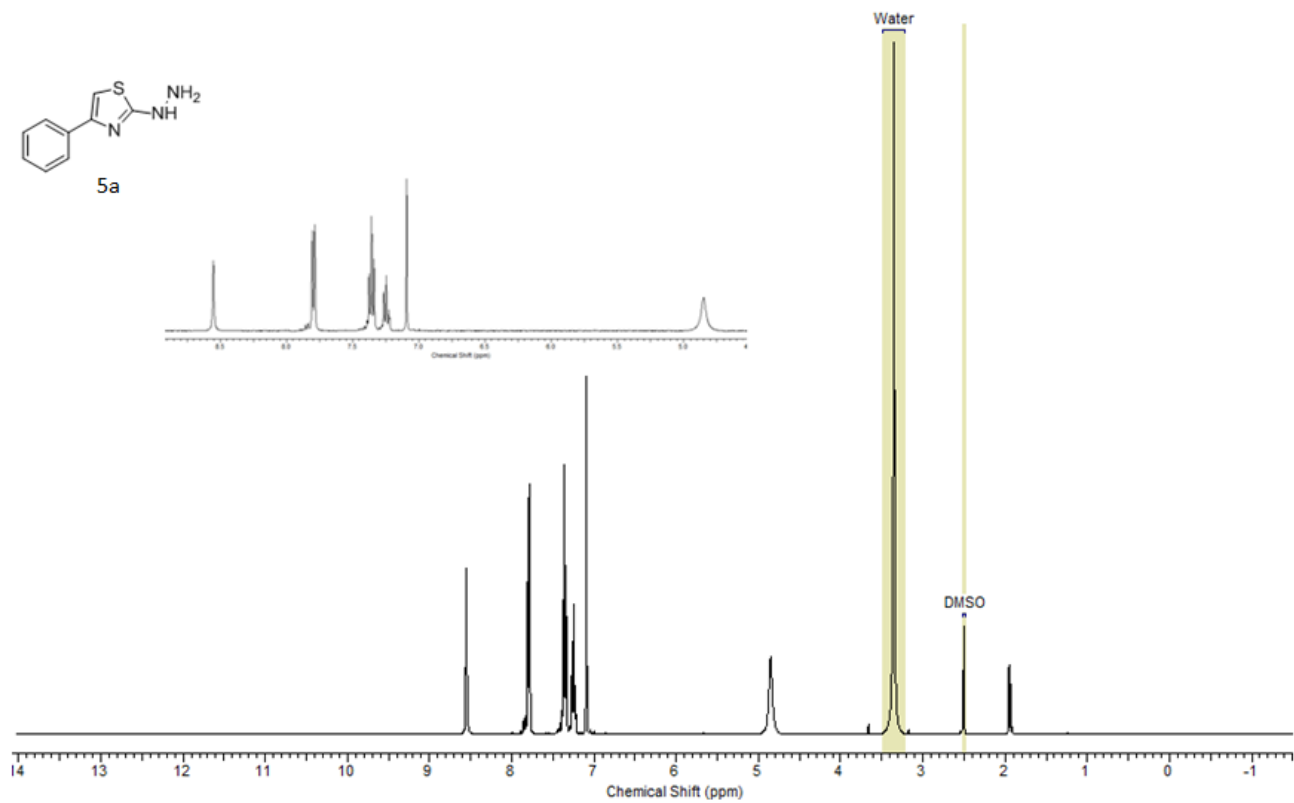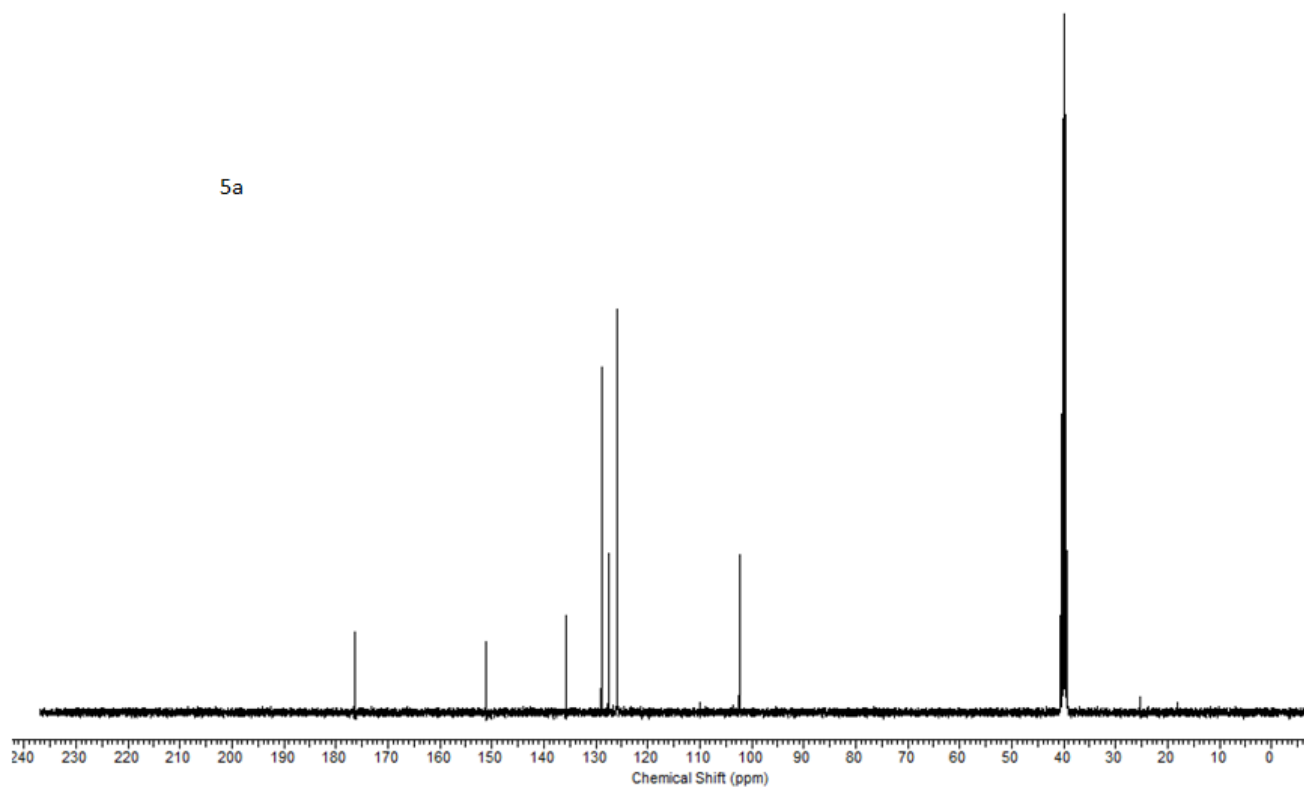

# 5\*a

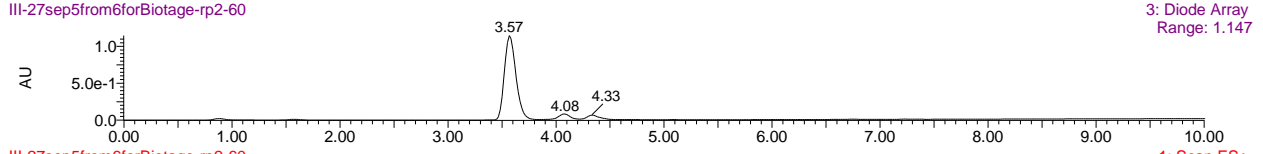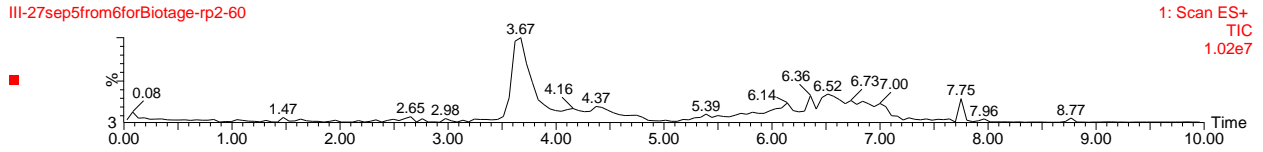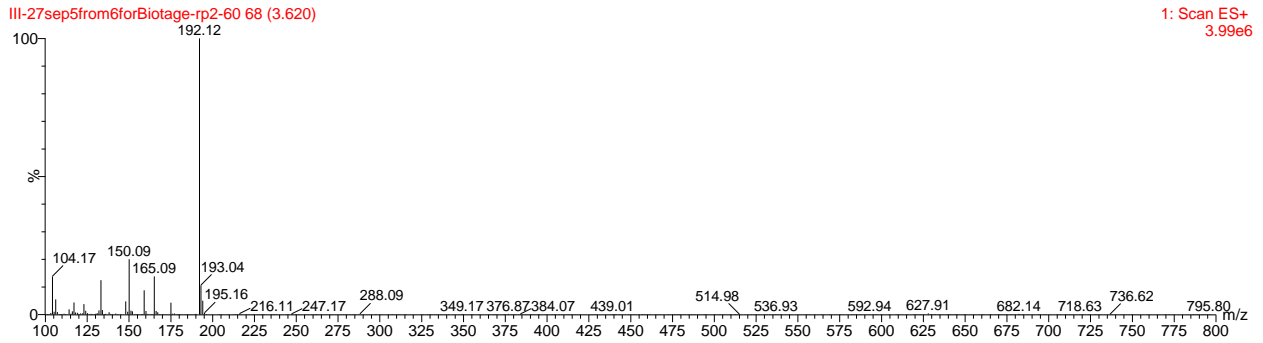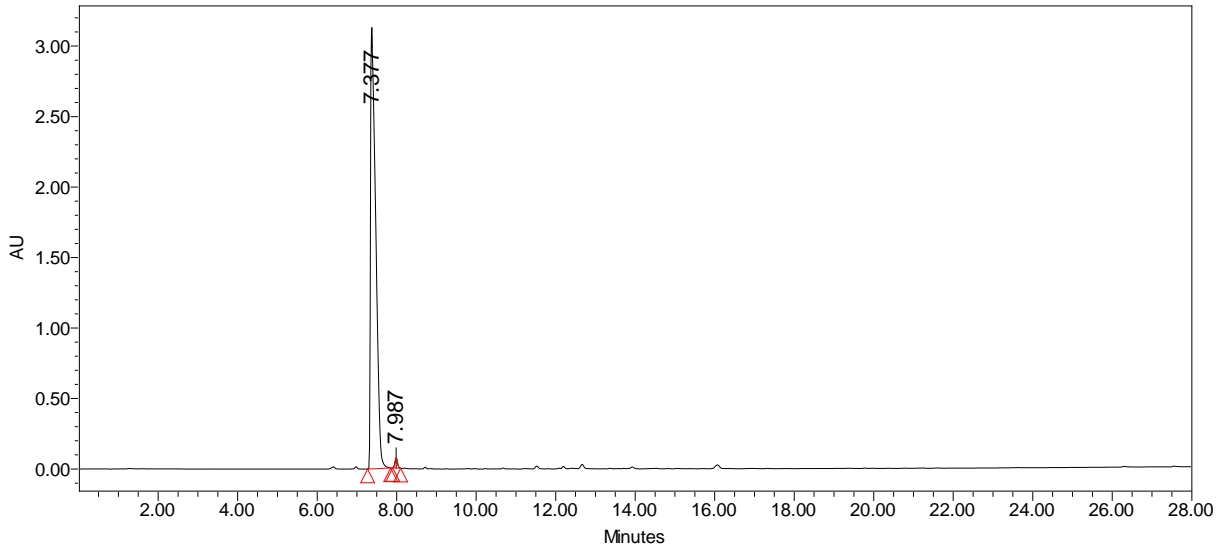

|   | Retention Time | % Area |
|---|----------------|--------|
| 1 | 7.377          | 98.92  |
| 2 | 7.987          | 1.08   |



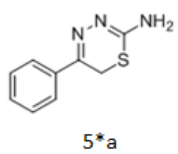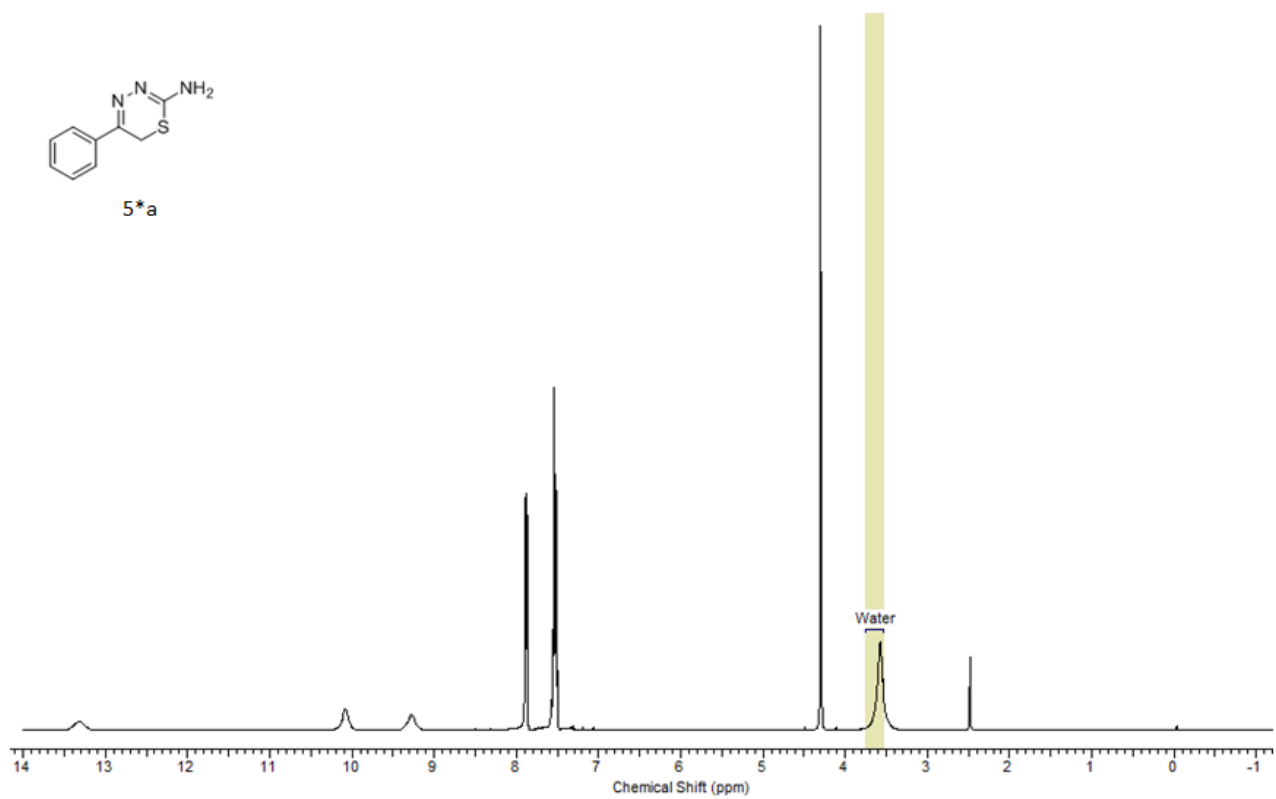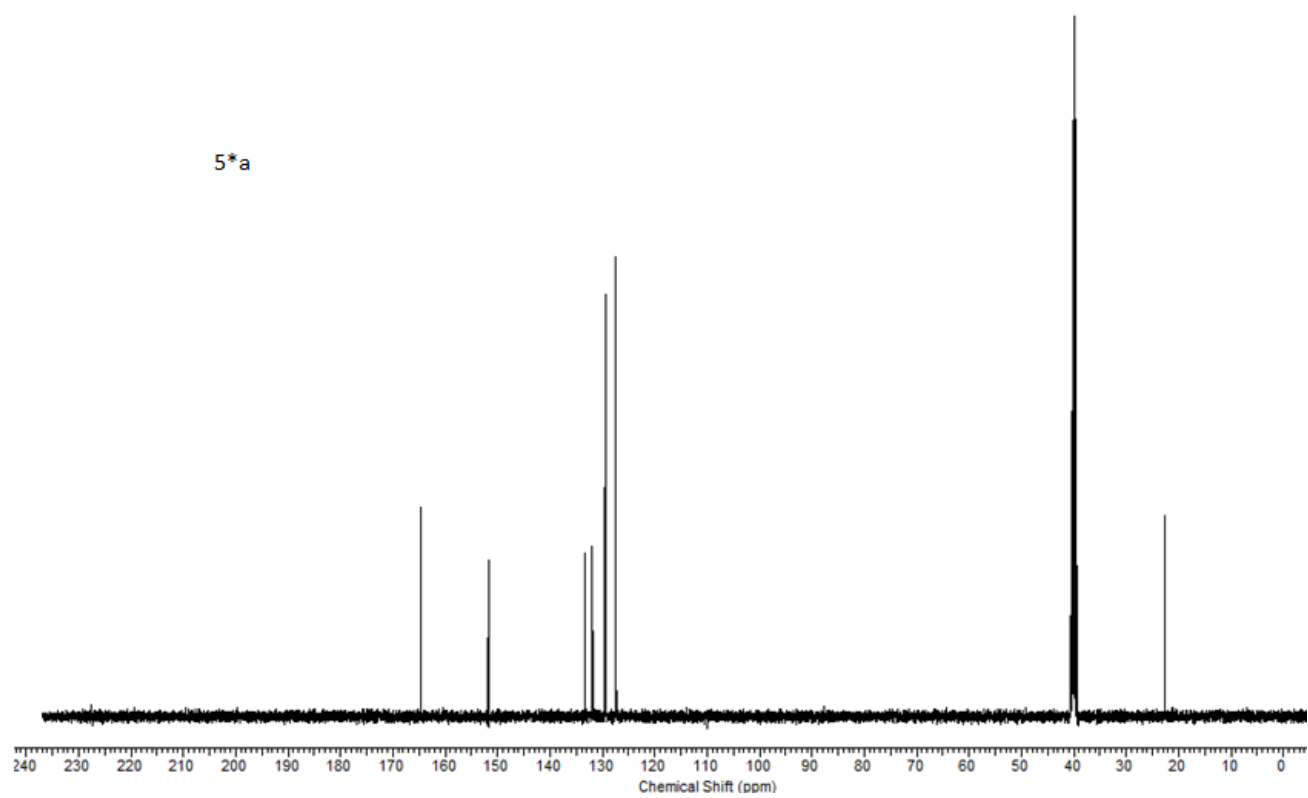

# 5d

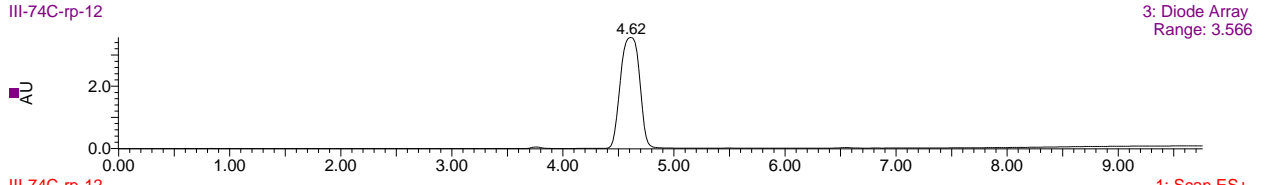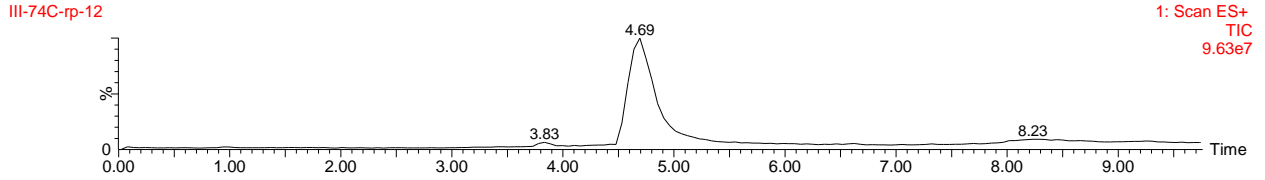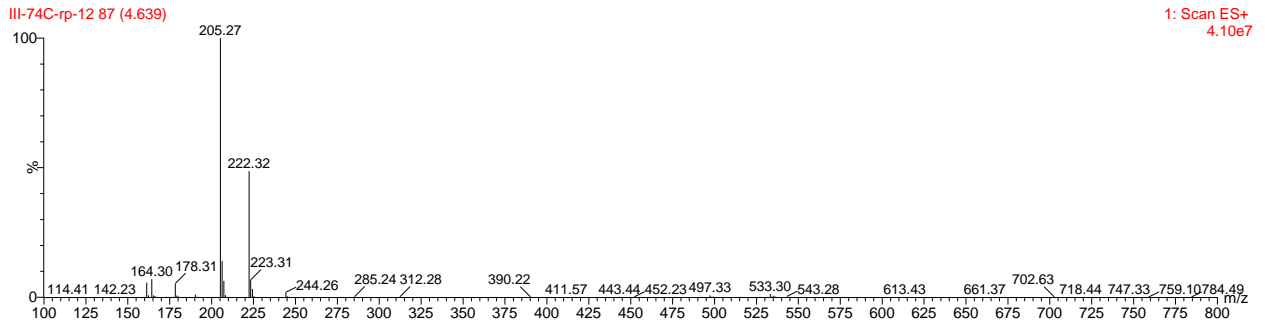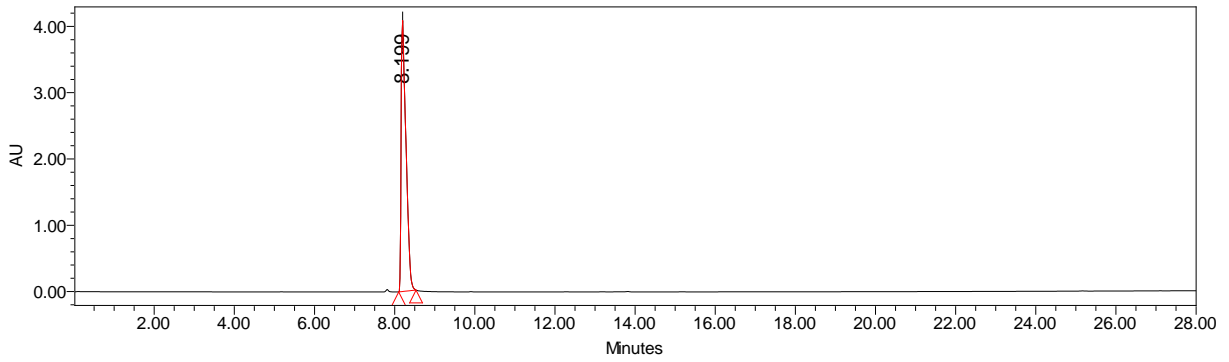

|   | Retention Time | % Area |
|---|----------------|--------|
| 1 | 8.199          | 100.00 |

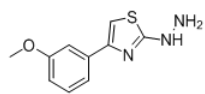

5d

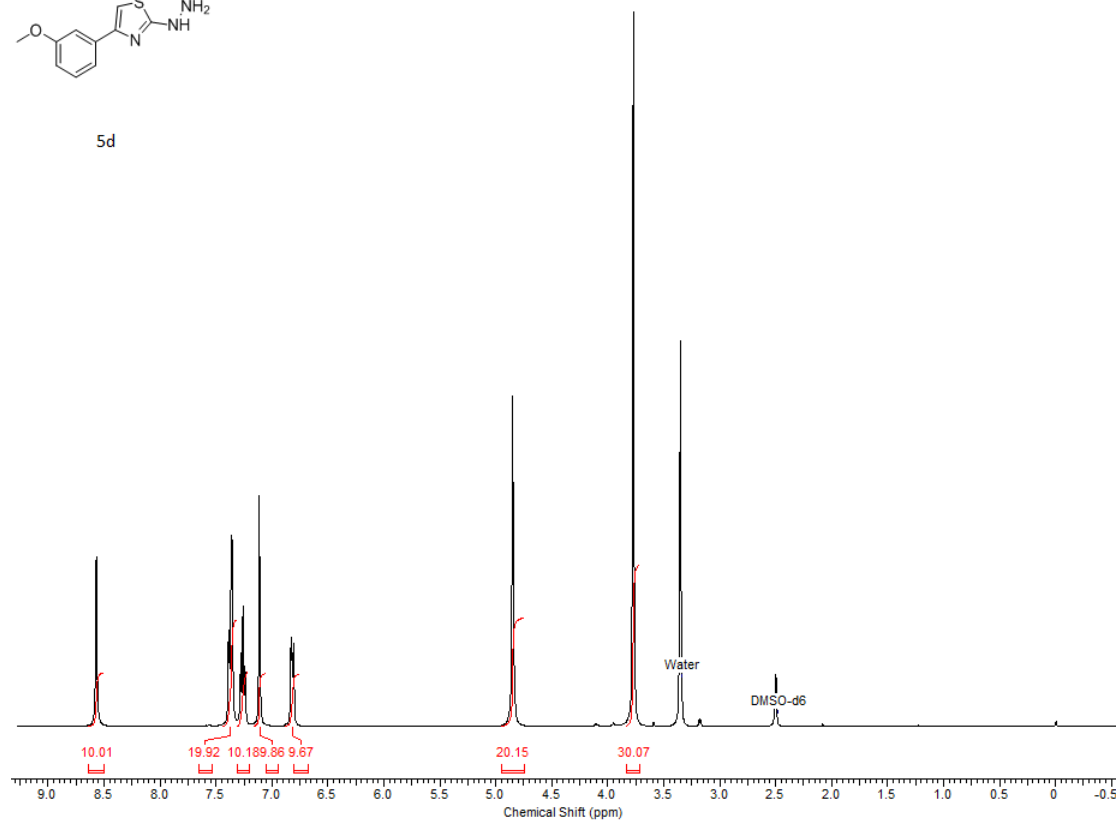

5d

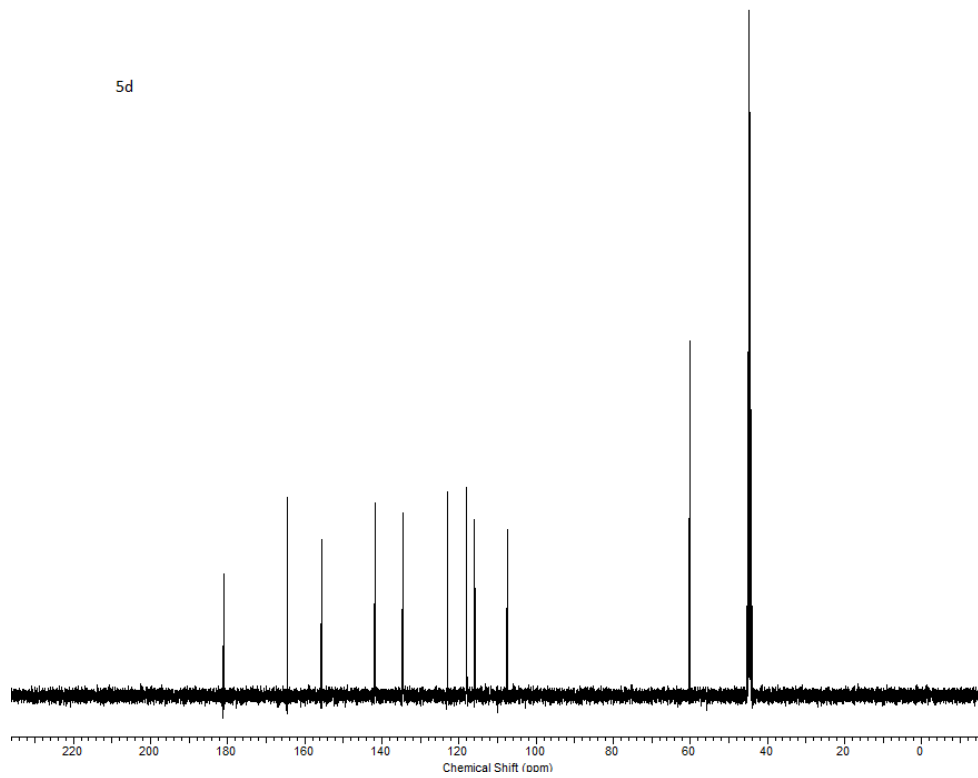

5\*d

III-74B

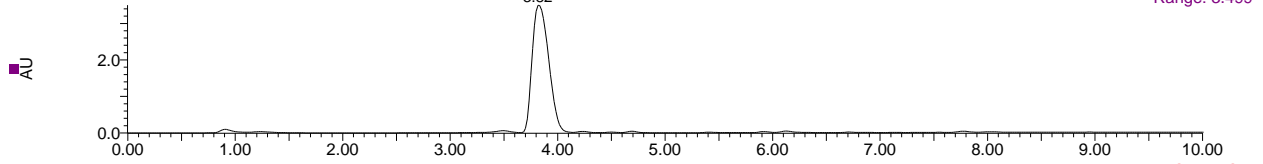

III-74B

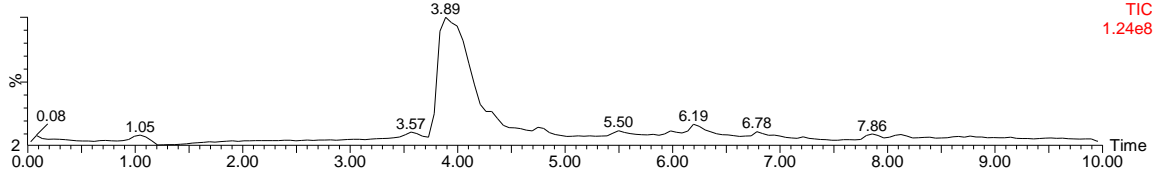

III-74B 74 (3.942)

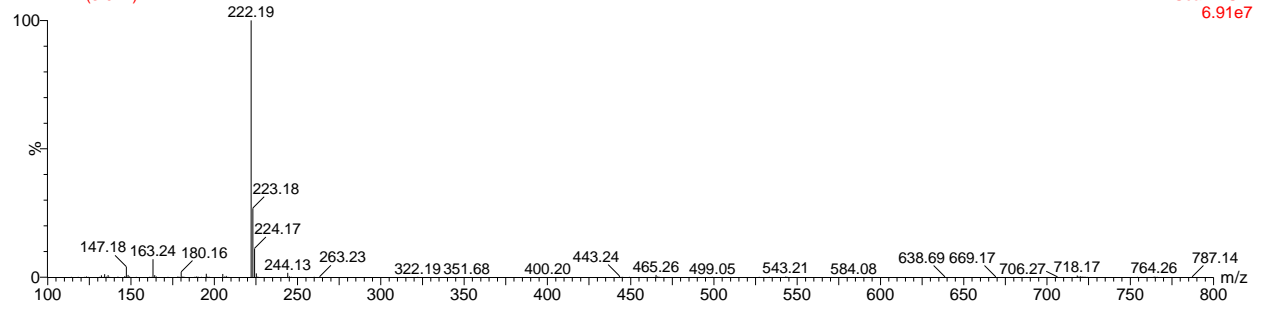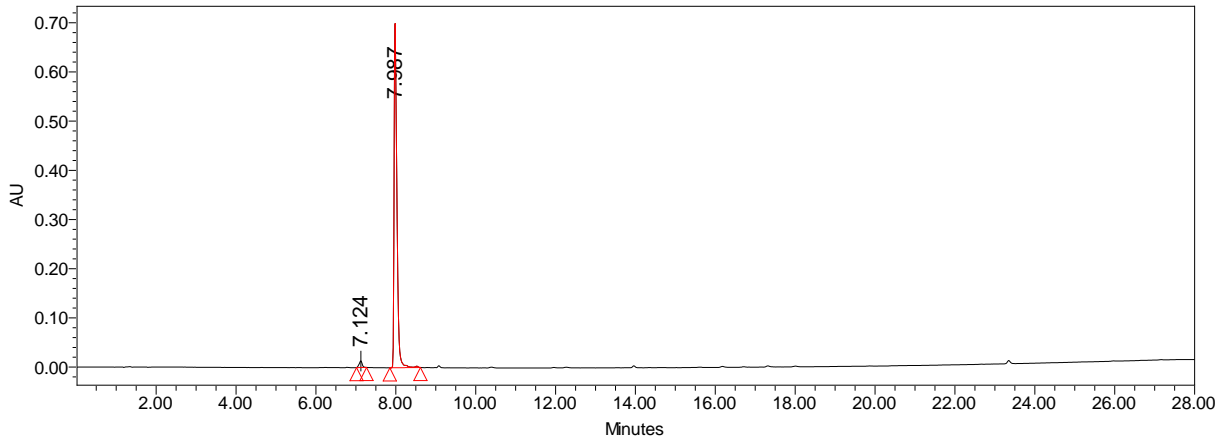

|   | Retention Time | % Area |
|---|----------------|--------|
| 1 | 7.124          | 1.97   |
| 2 | 7.987          | 98.03  |

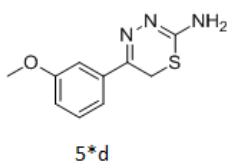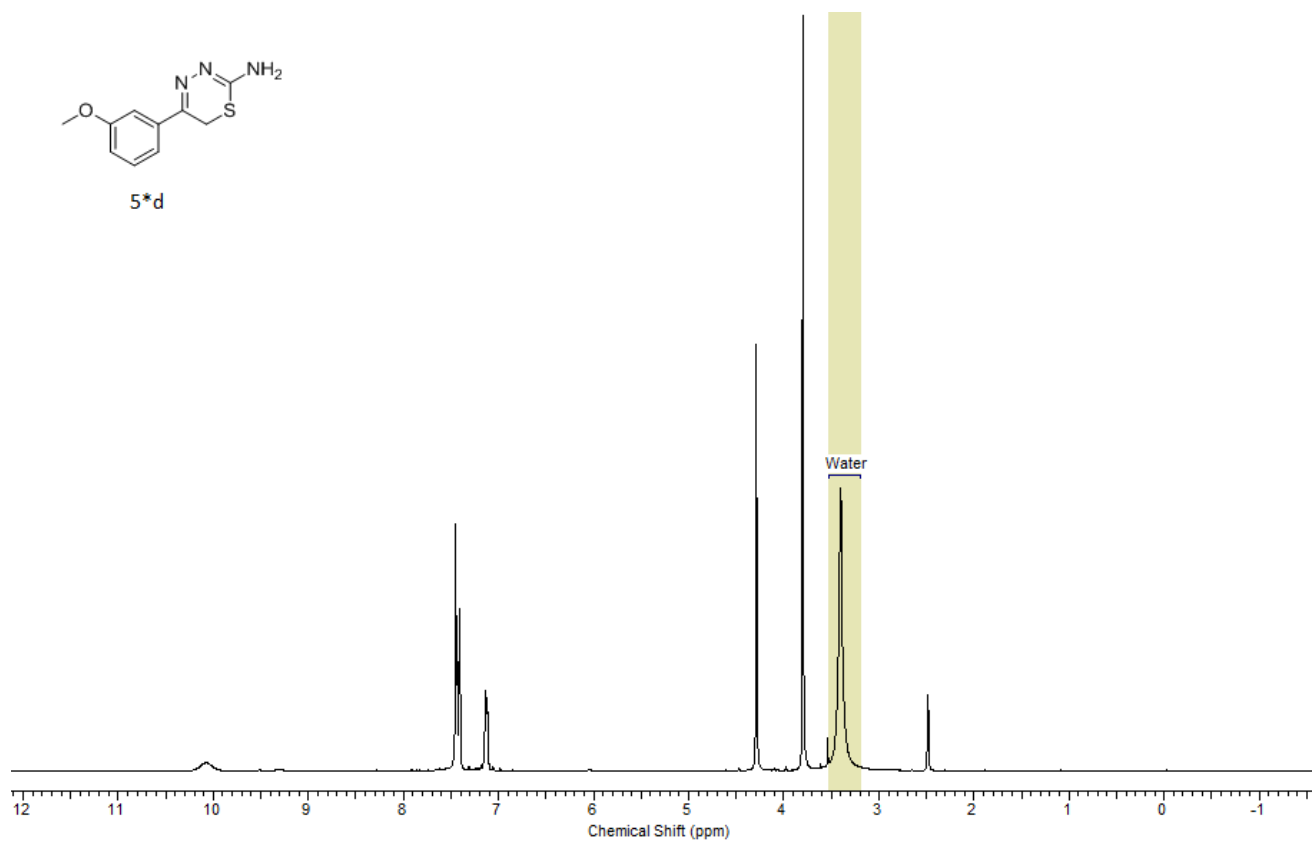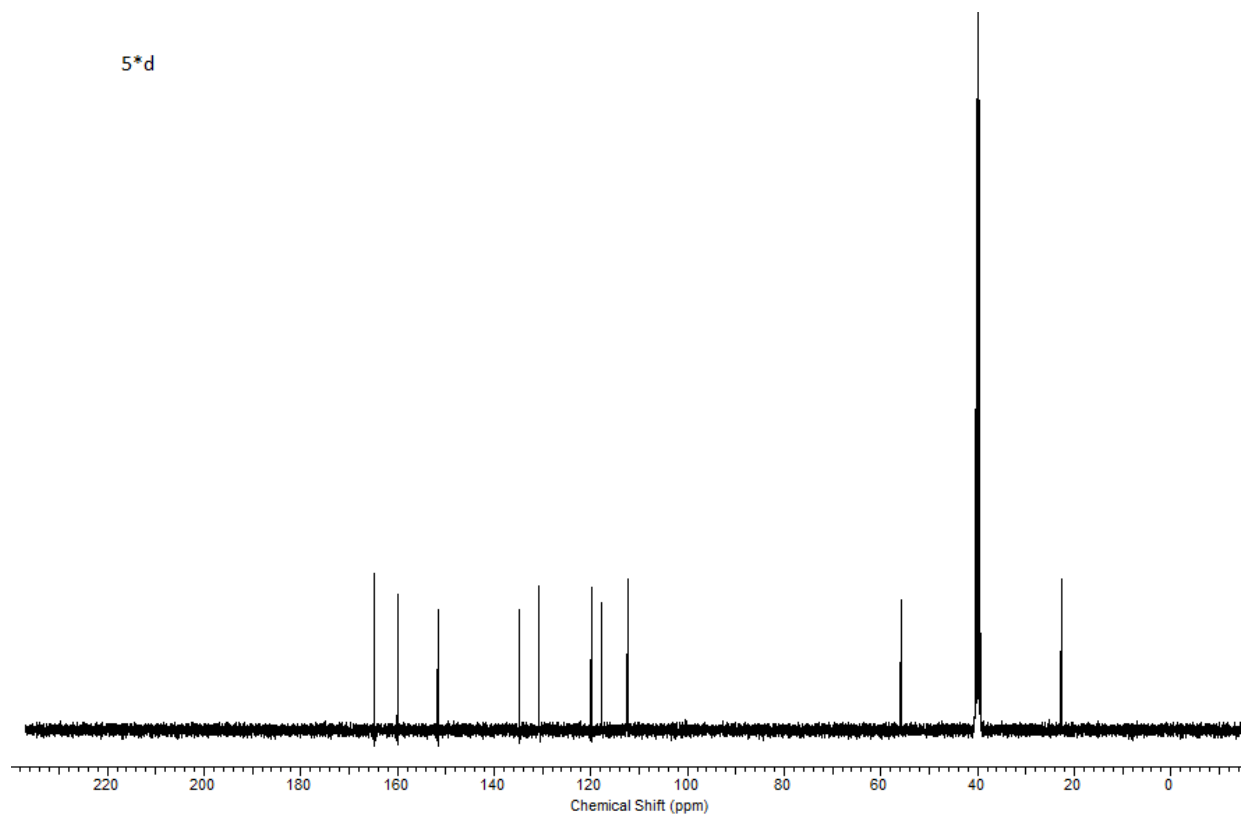

5k

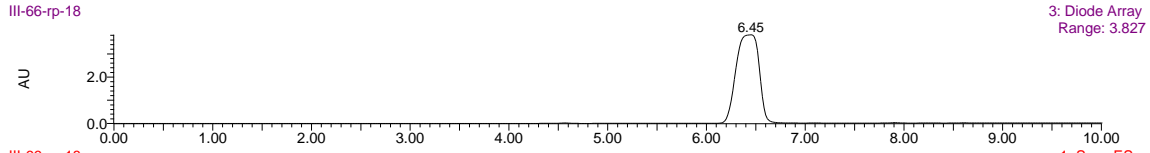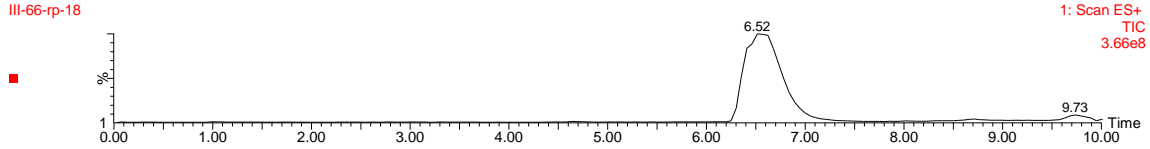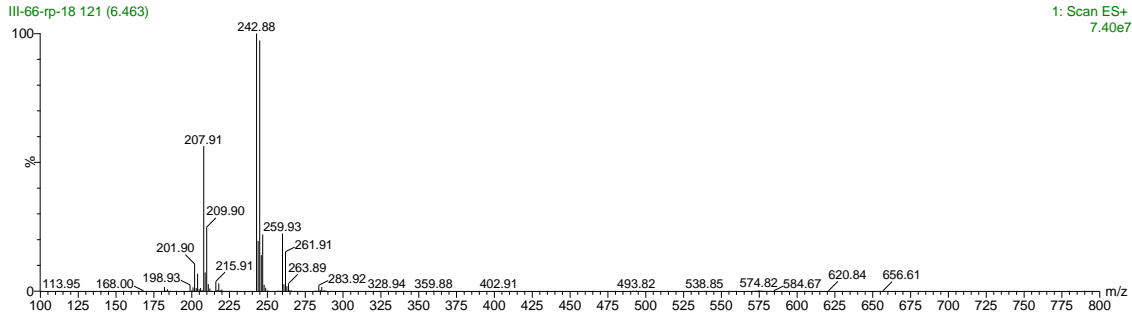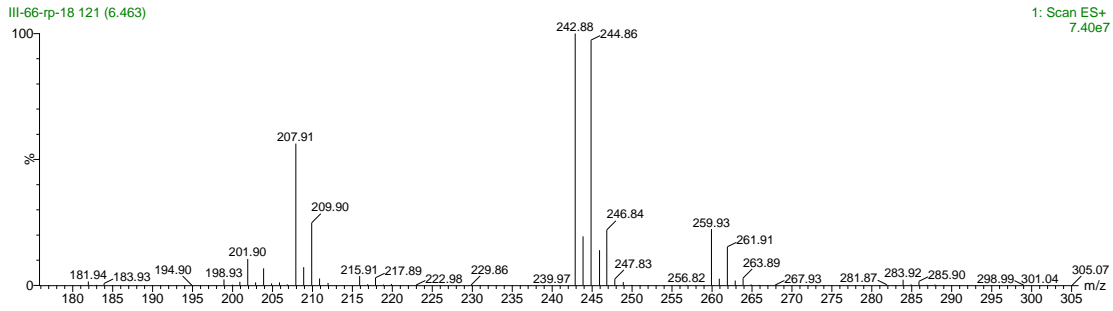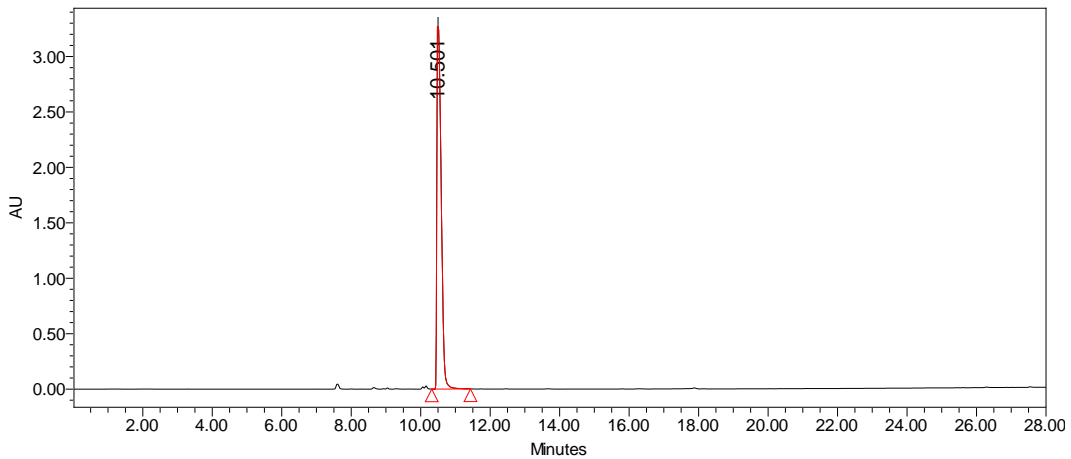

|   | Retention Time | % Area |
|---|----------------|--------|
| 1 | 10.501         | 100.00 |

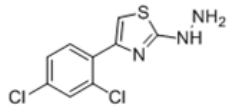

5k

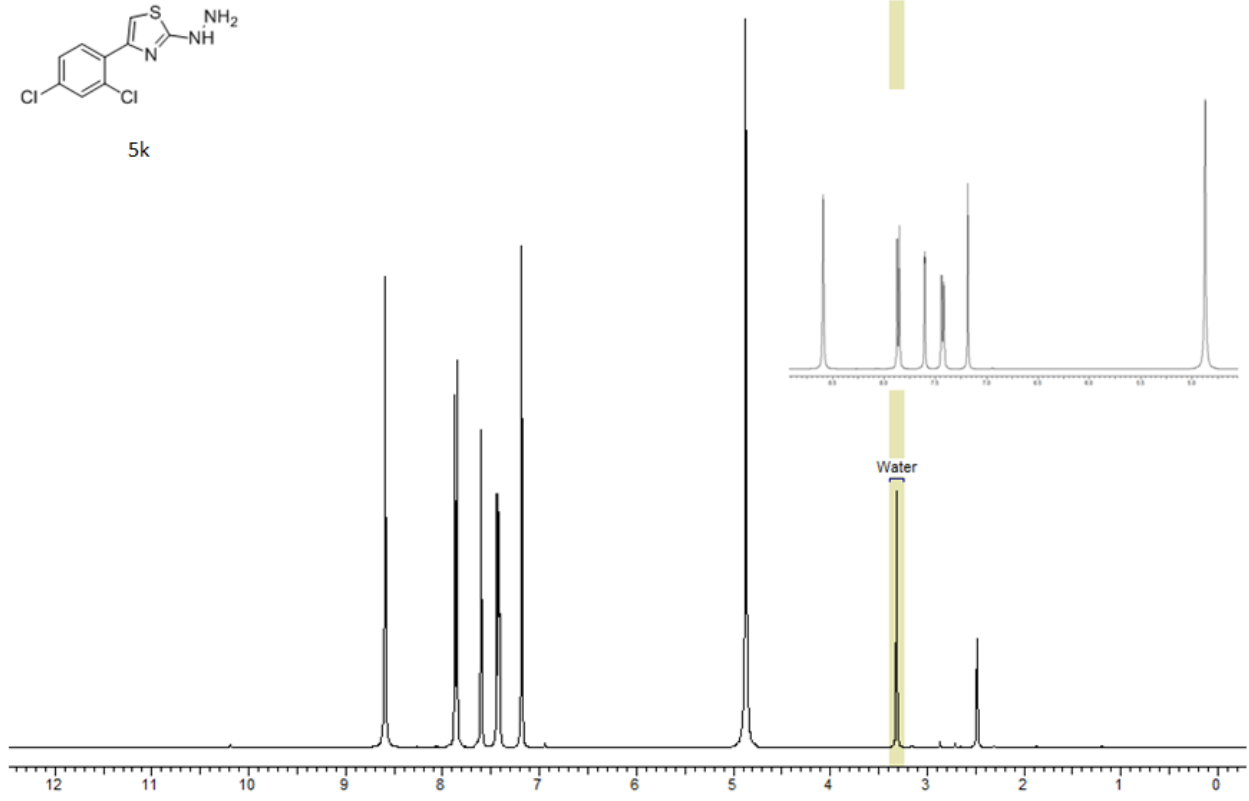

5k

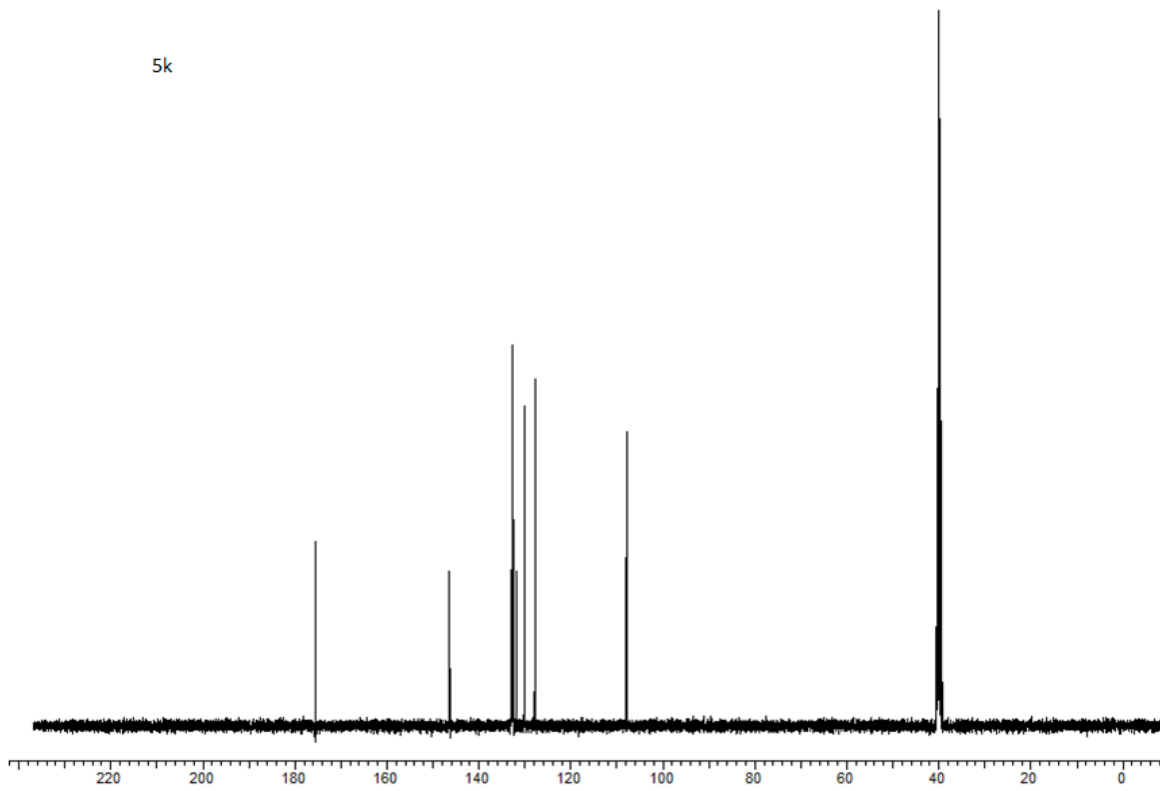

5\*k

III-66-rpsep5frm6-2

3: Diode Array  
Range: 1.37

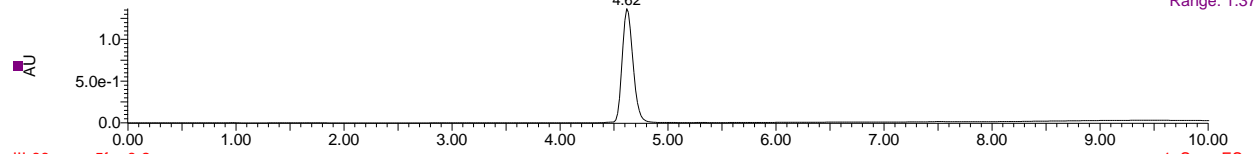

III-66-rpsep5frm6-2

1: Scan ES+  
TIC  
8.57e7

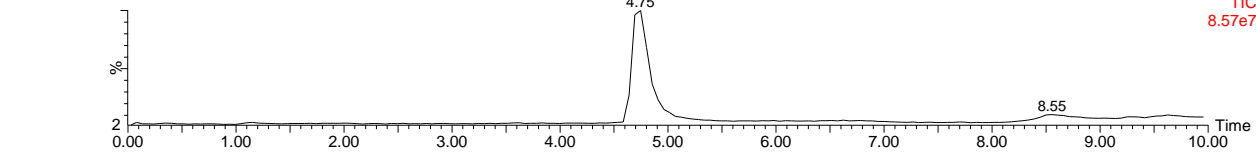

III-66-rpsep5frm6-2 88 (4.693)

1: Scan ES+  
3.15e7

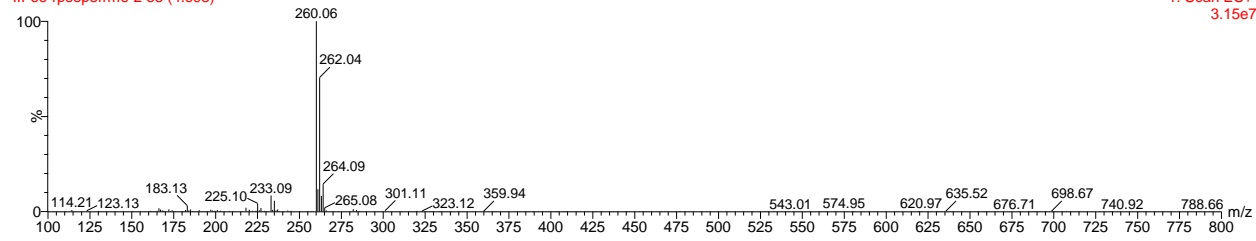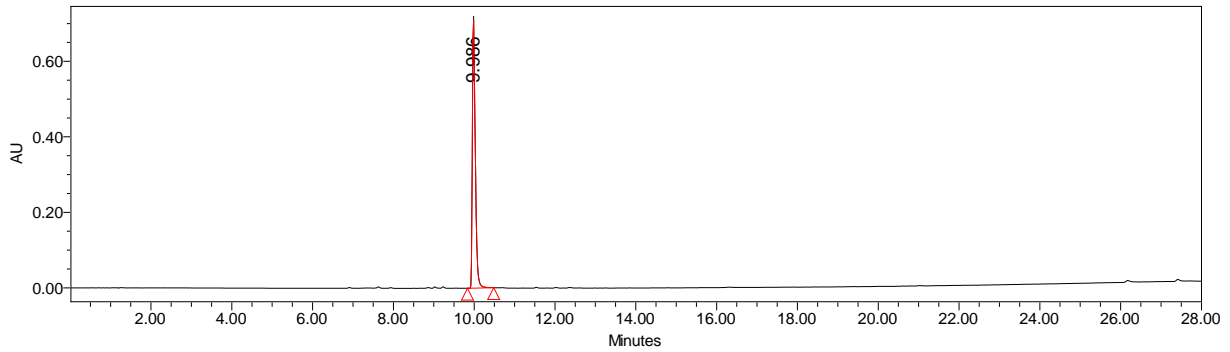

|   | Retention Time | % Area |
|---|----------------|--------|
| 1 | 9.986          | 100.00 |



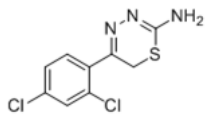

5\*k

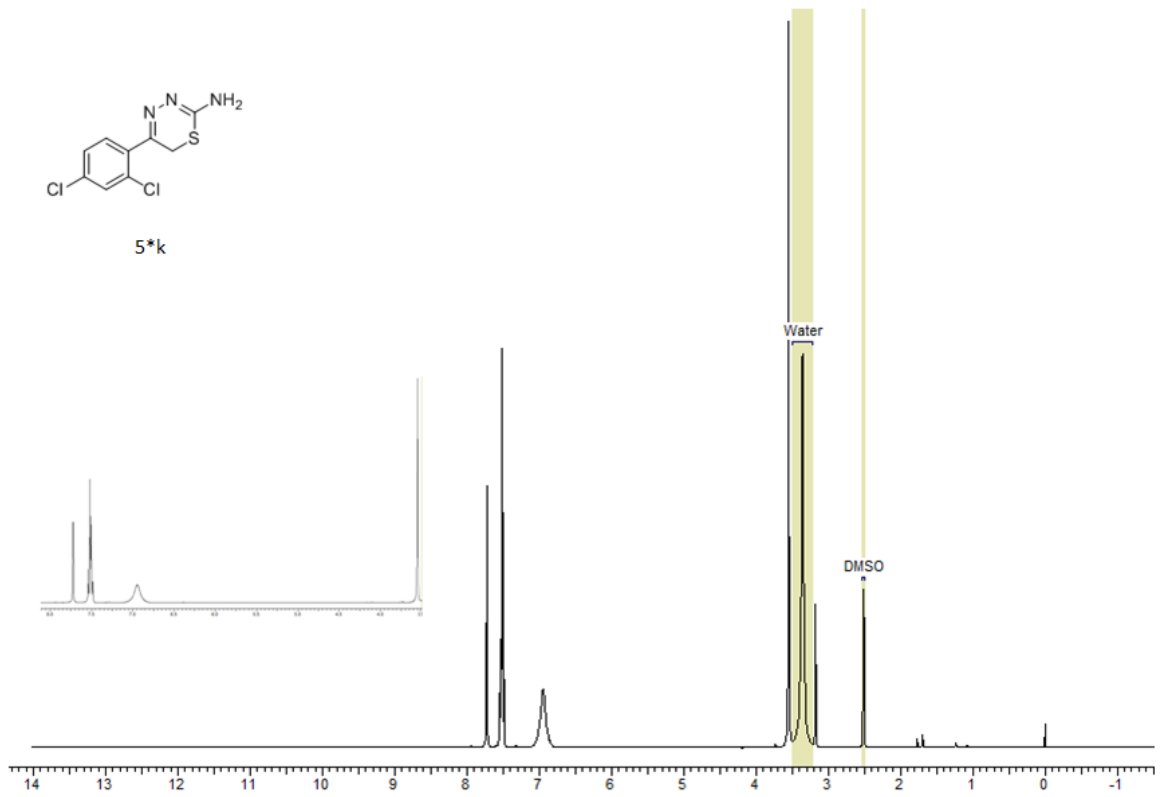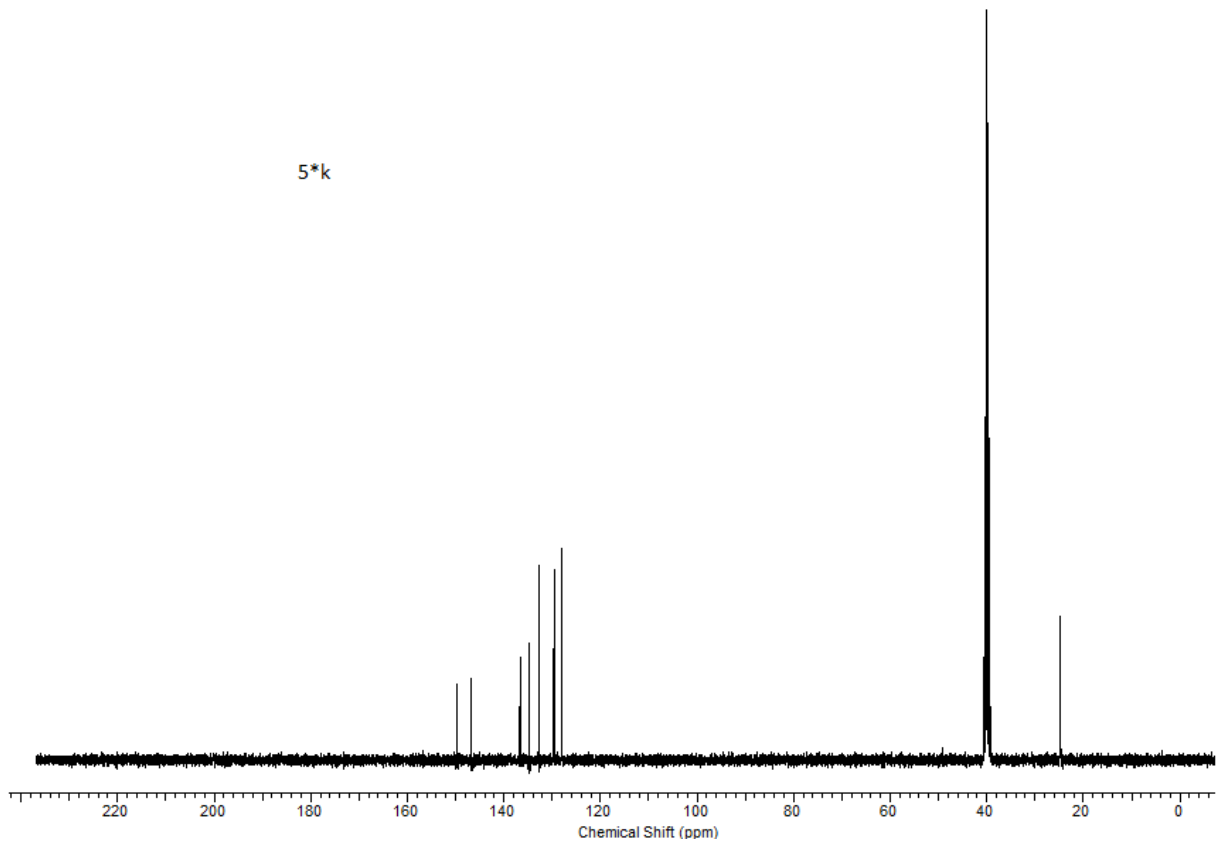

51

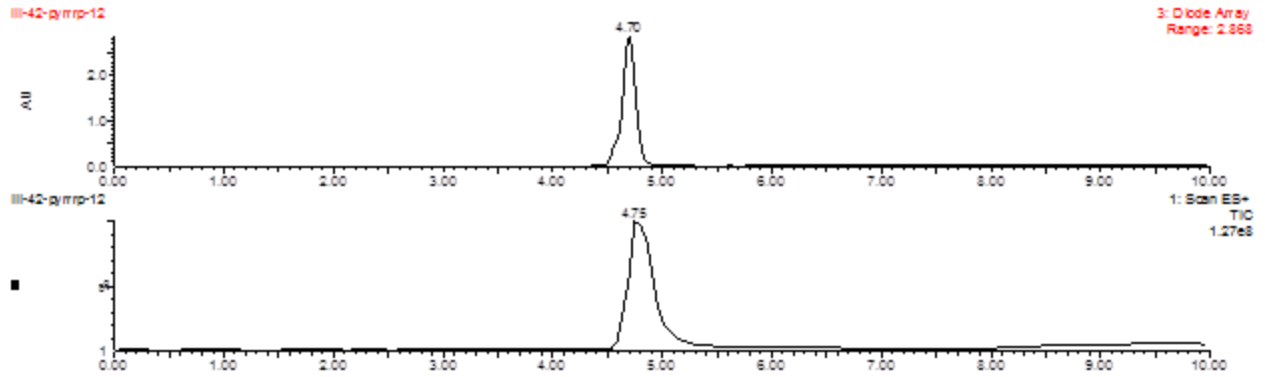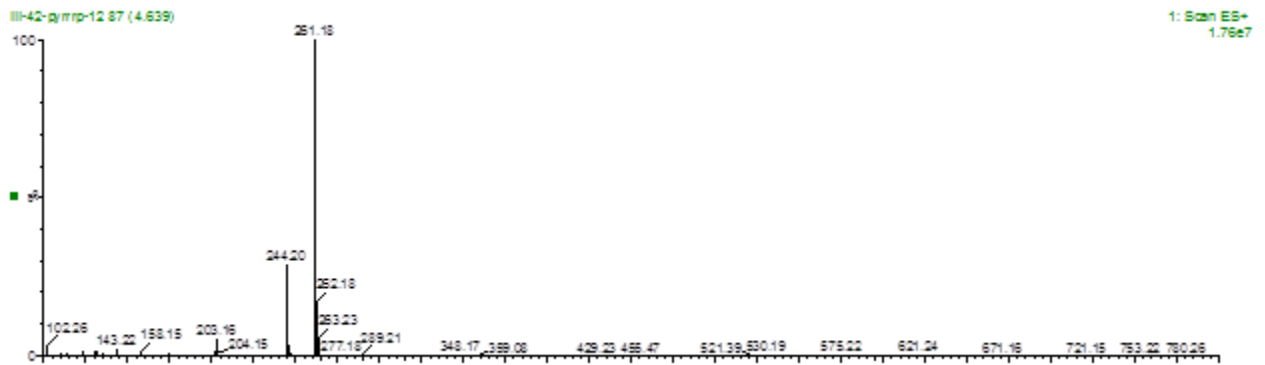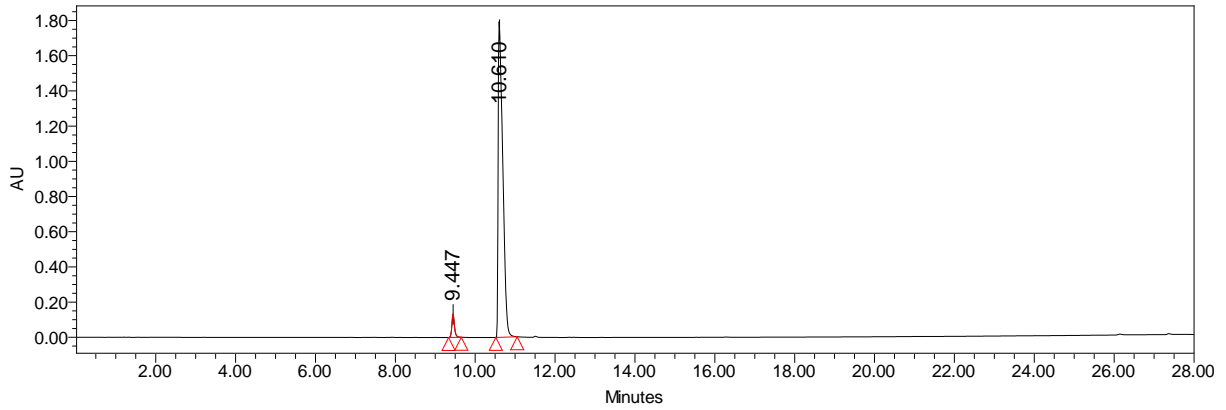

|   | Retention Time | % Area |
|---|----------------|--------|
| 1 | 9.447          | 4.09   |
| 2 | 10.610         | 95.91  |

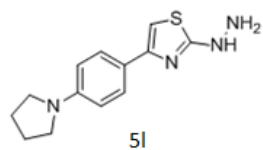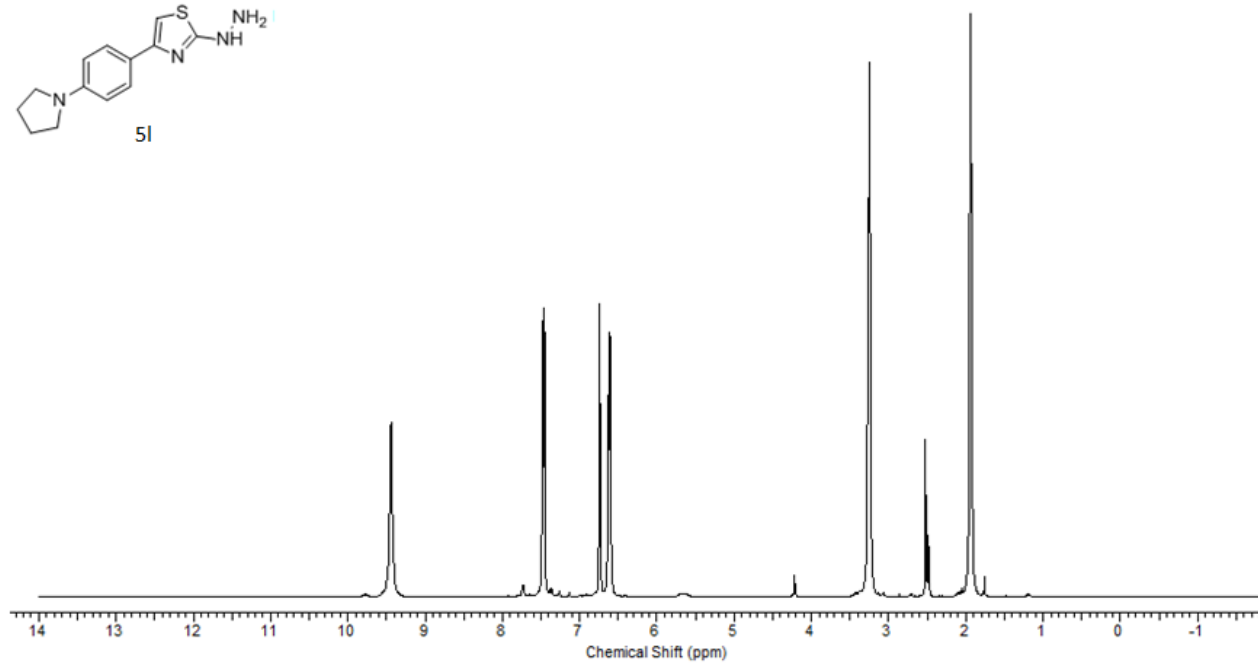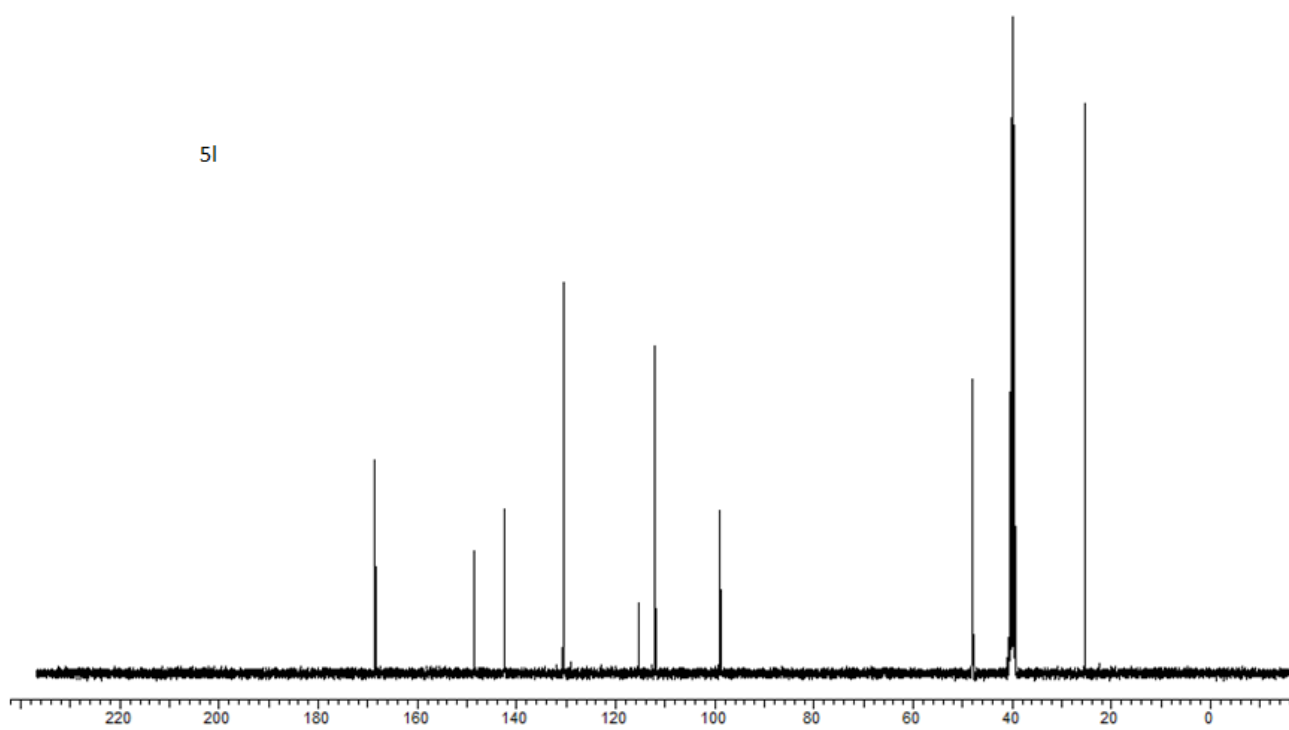

5\*1

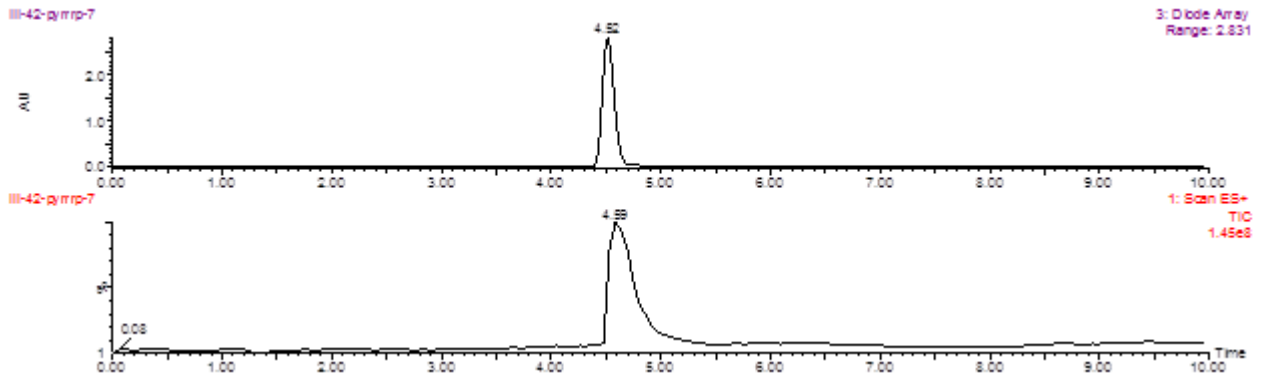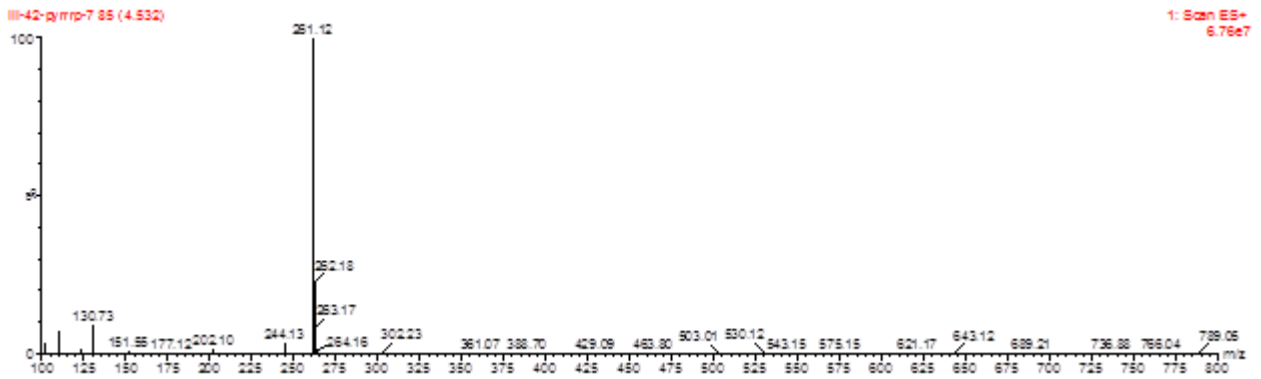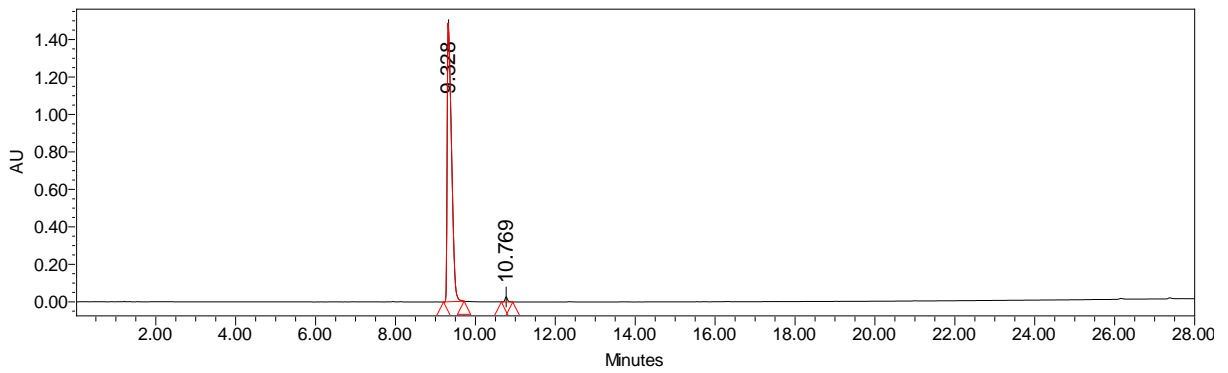

|   | Retention Time | % Area |
|---|----------------|--------|
| 1 | 9.328          | 98.95  |
| 2 | 10.769         | 1.05   |

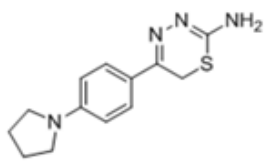

5\*1

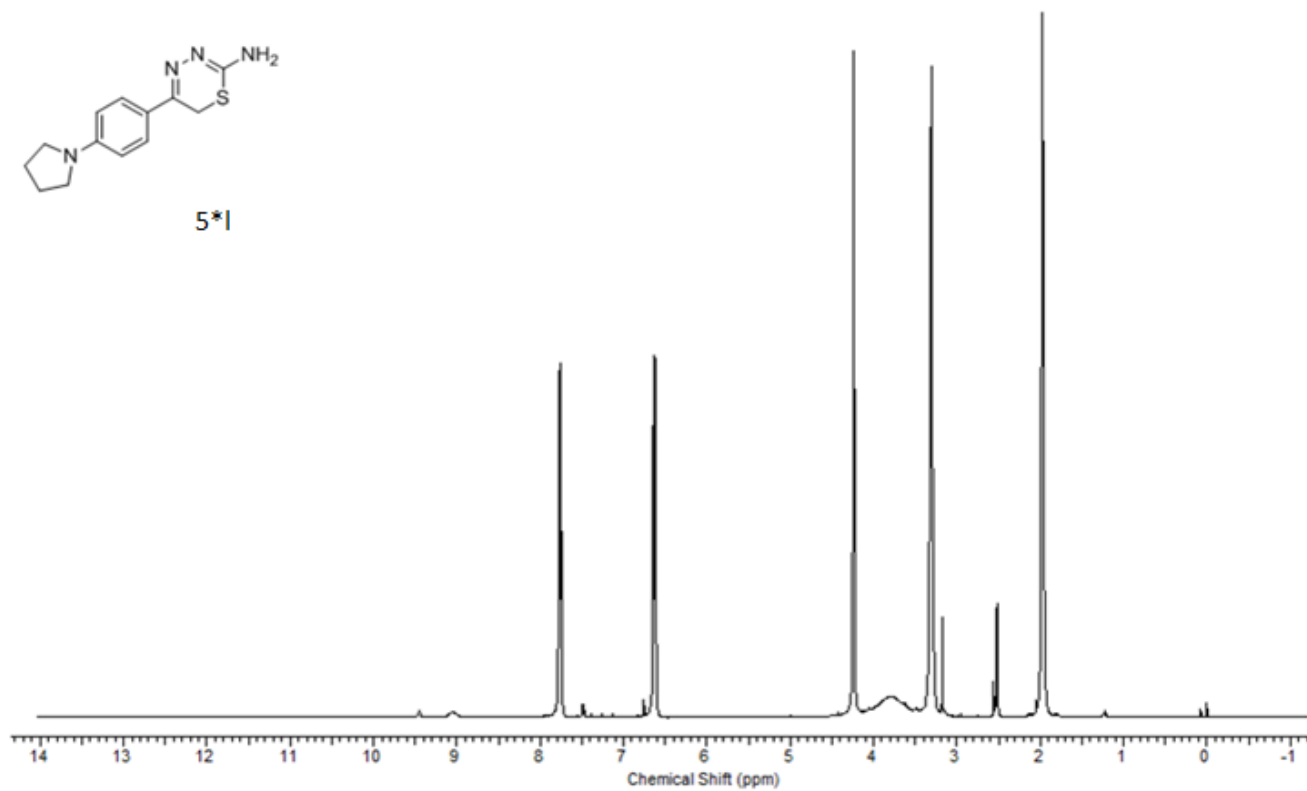

5\*1

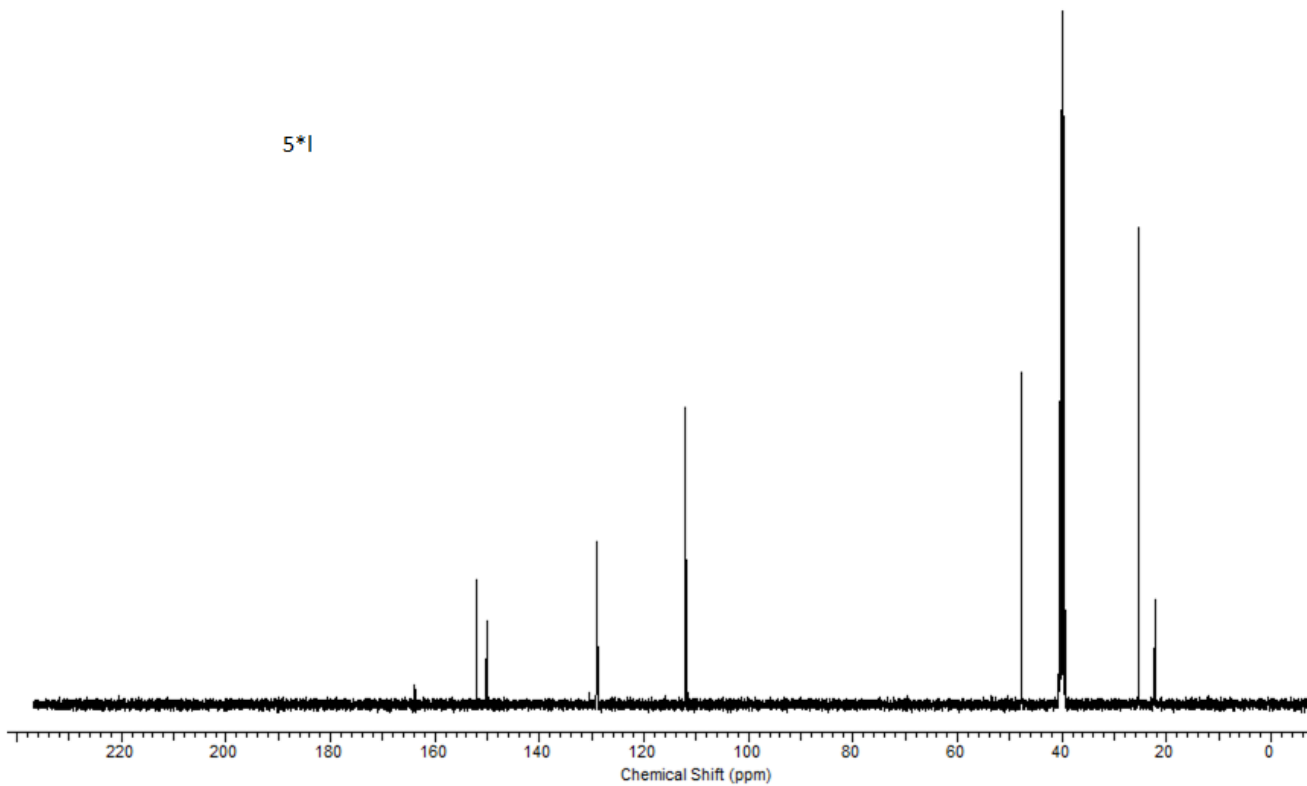

# 5m

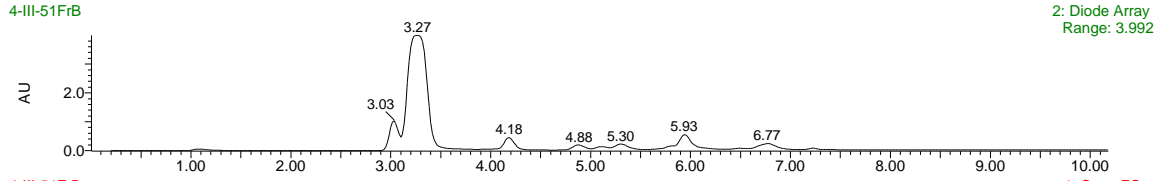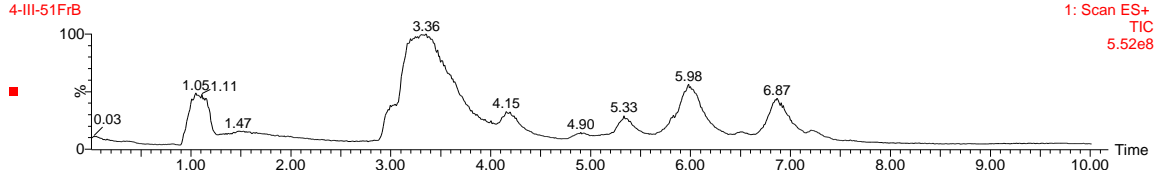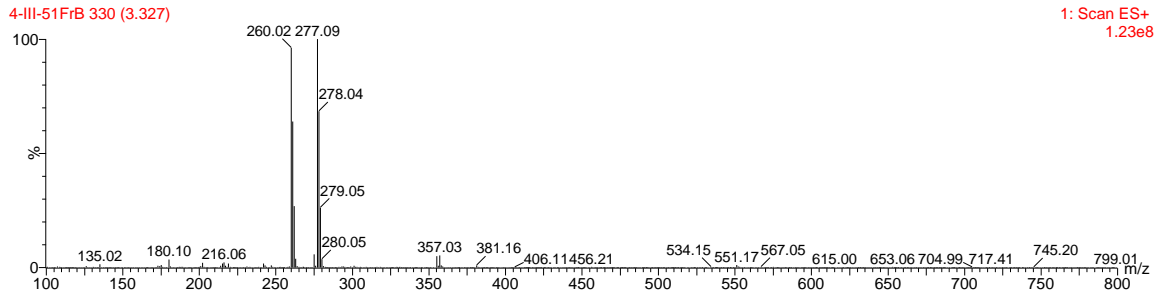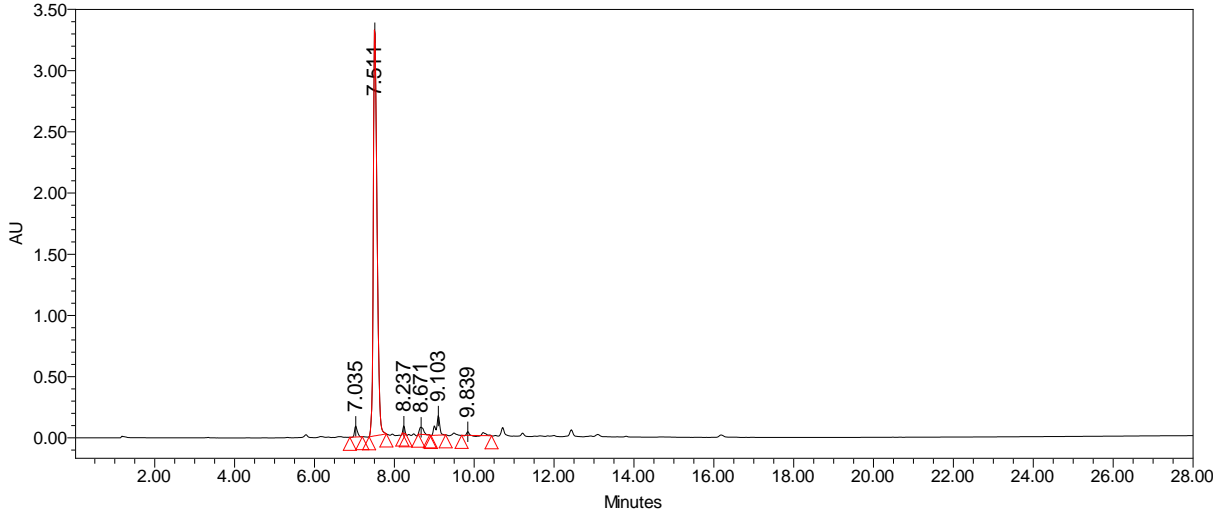

|   | Retention Time | % Area |
|---|----------------|--------|
| 1 | 7.035          | 1.85   |
| 2 | 7.511          | 89.85  |
| 3 | 8.237          | 0.71   |
| 4 | 8.671          | 1.74   |
| 5 | 9.103          | 4.24   |
| 6 | 9.839          | 1.62   |

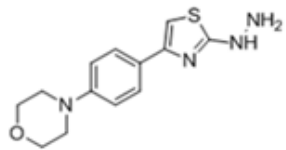

5m

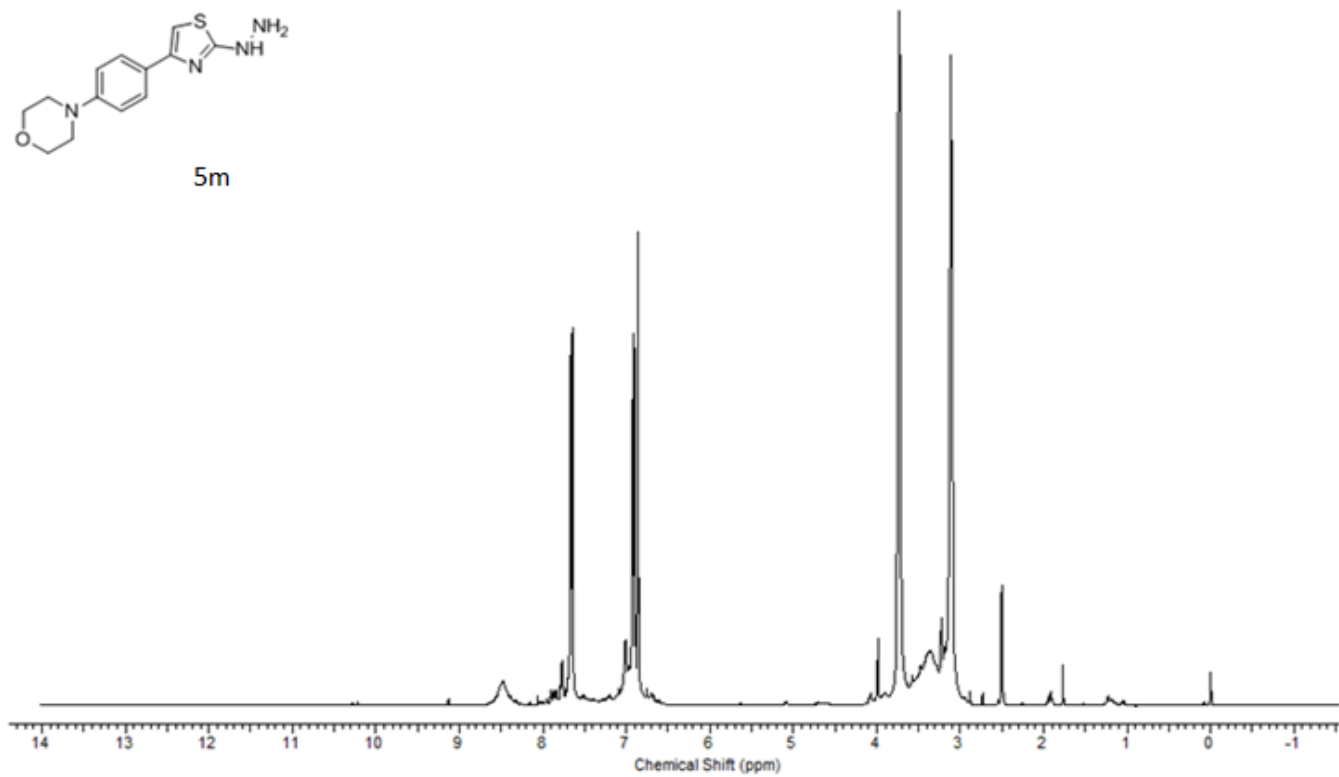

5m

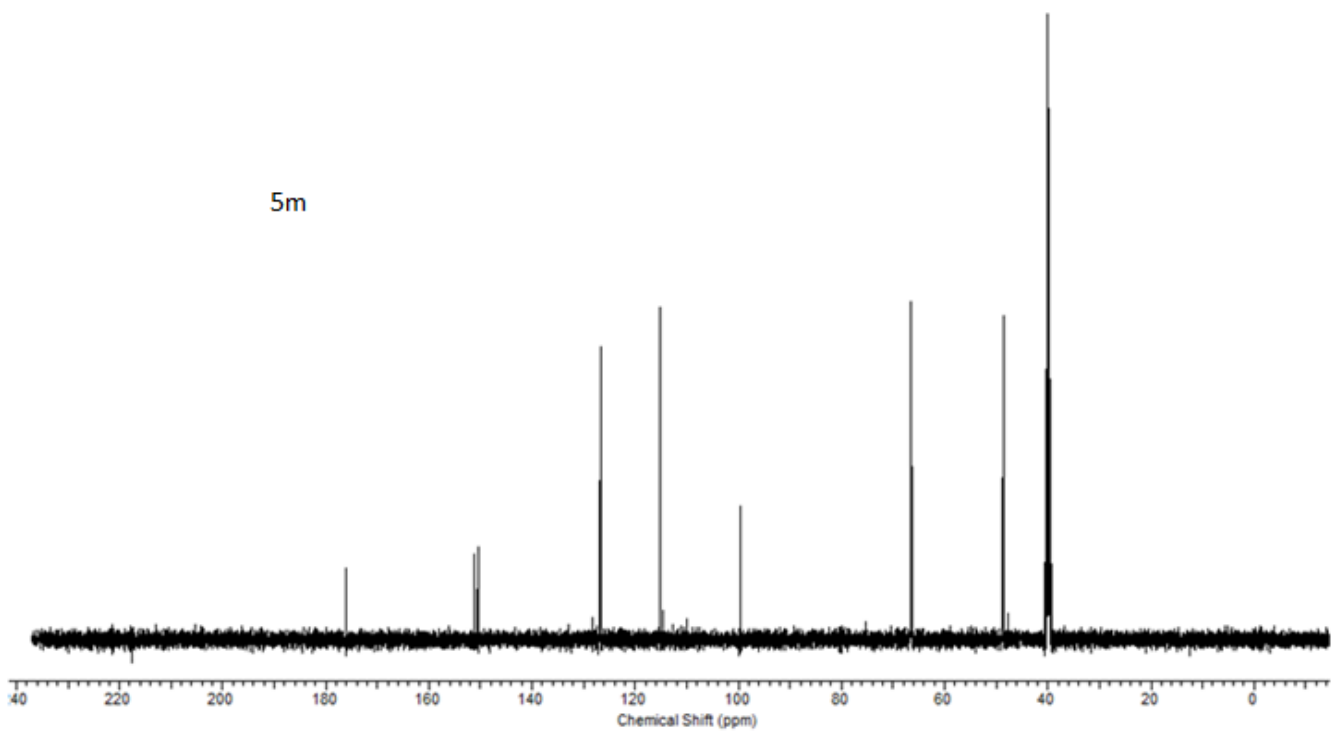

5\*m

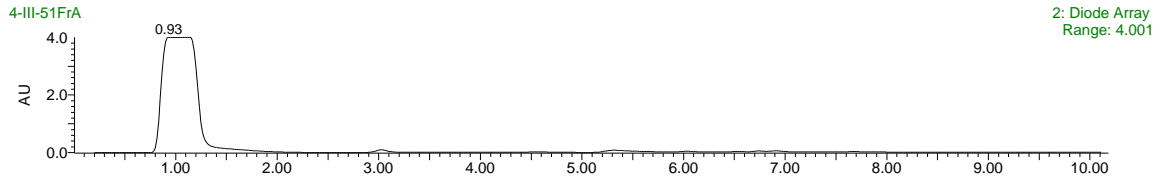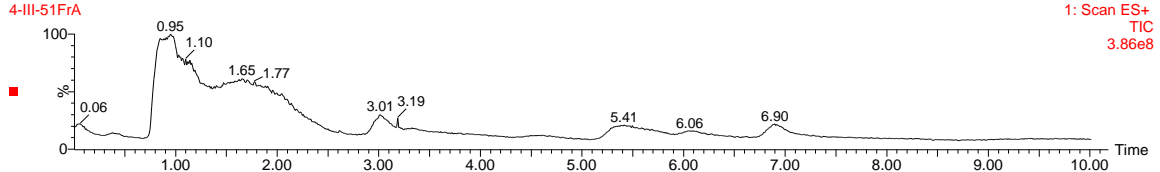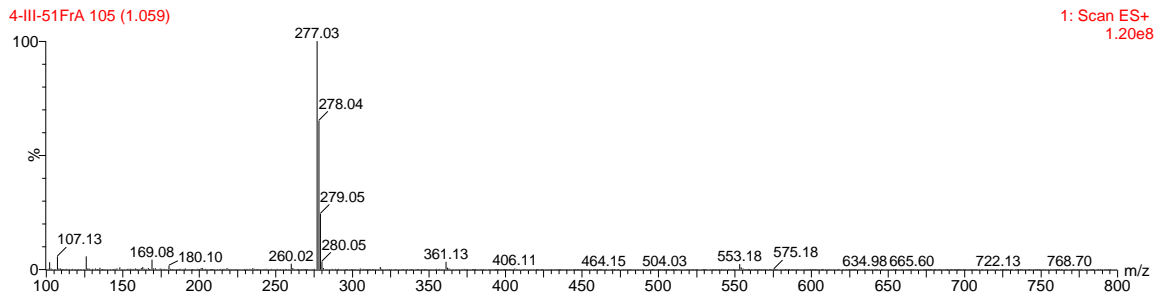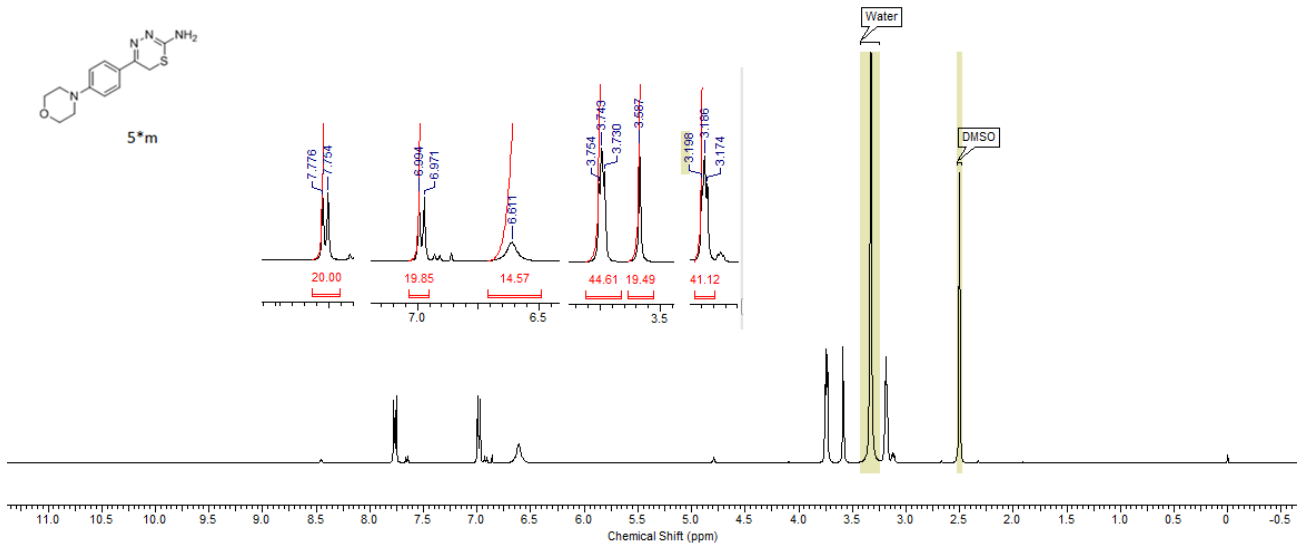



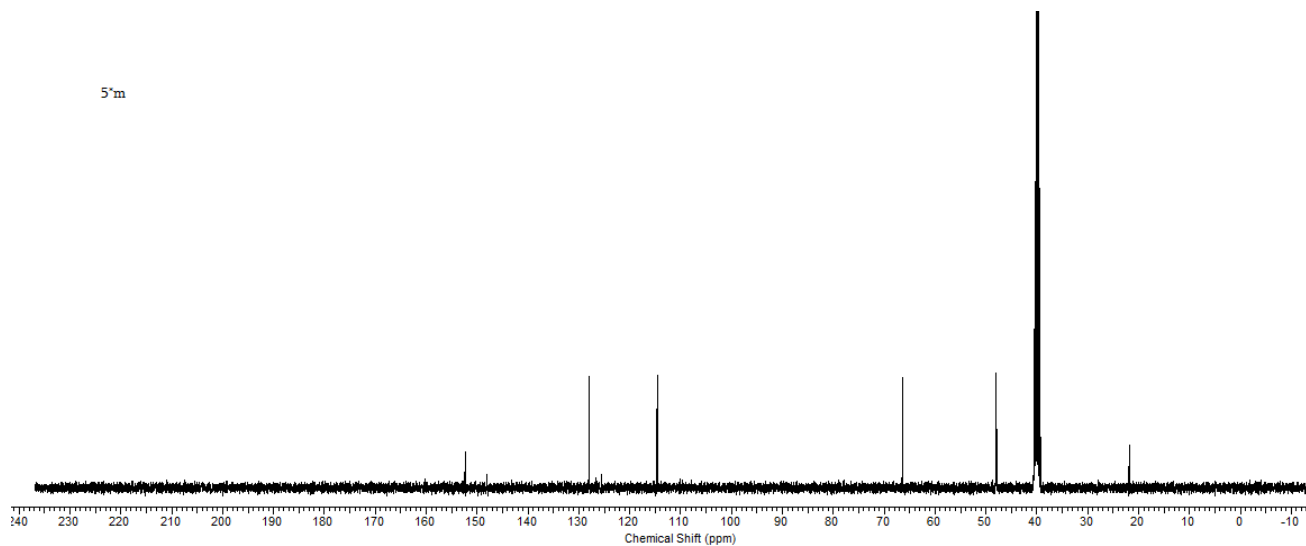

5n

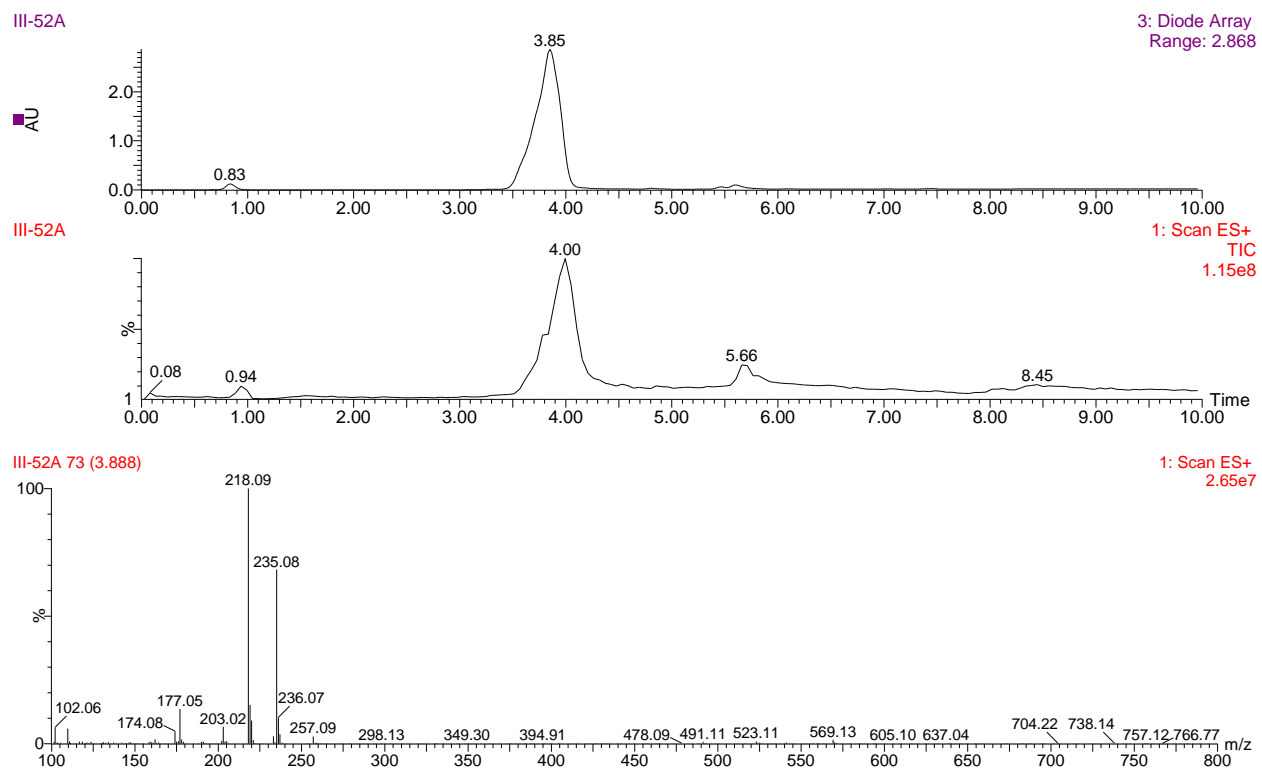

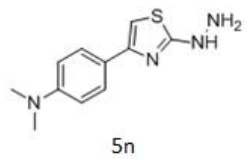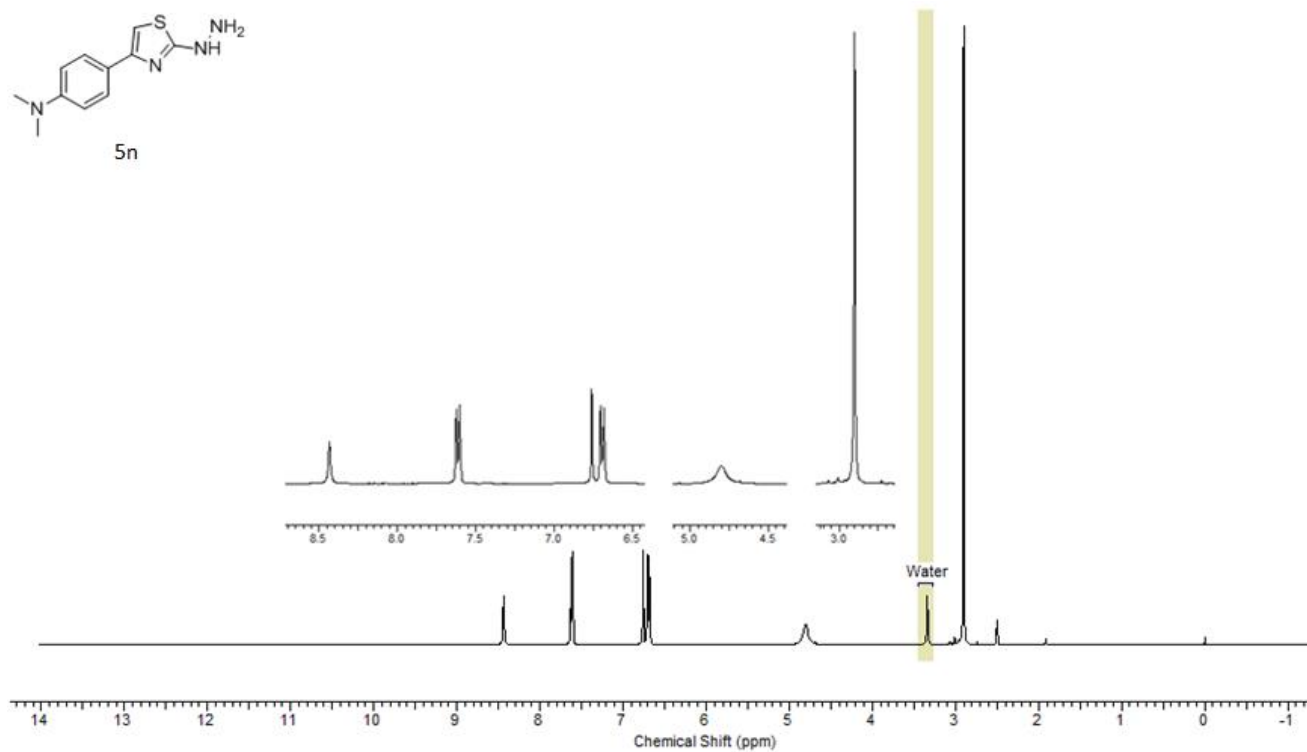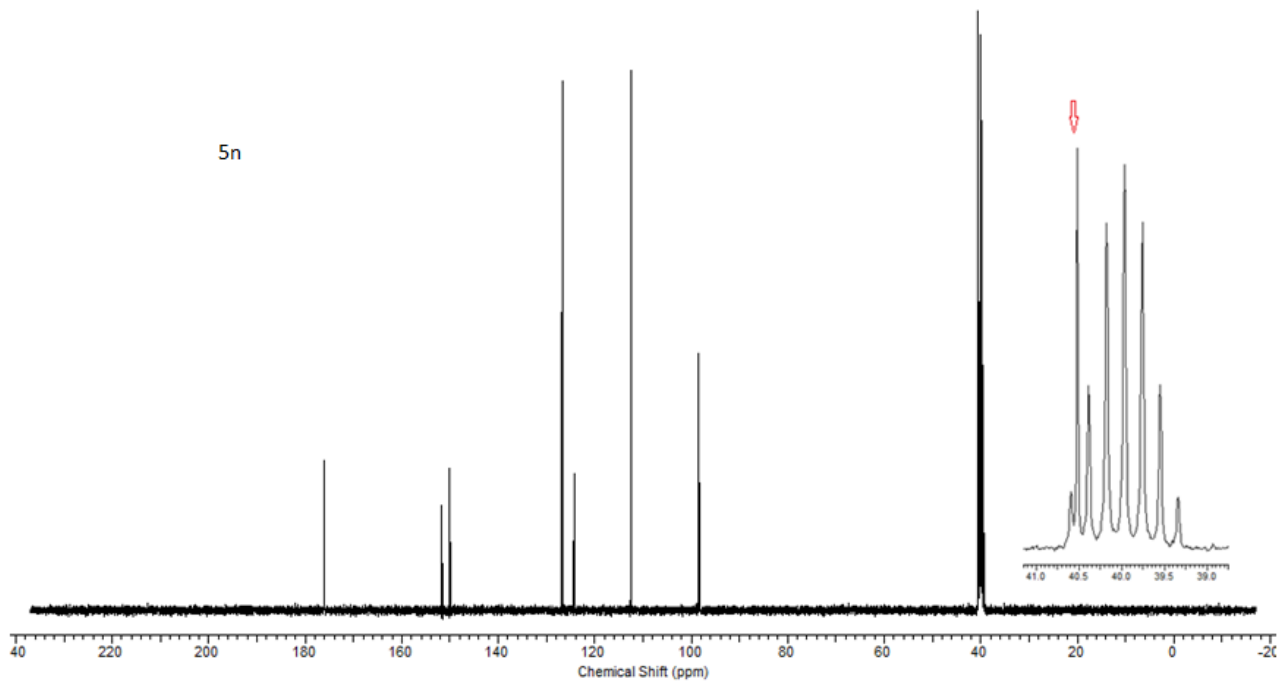

50

III-101-thiazole-dil3

3: Diode Array  
Range: 1.744

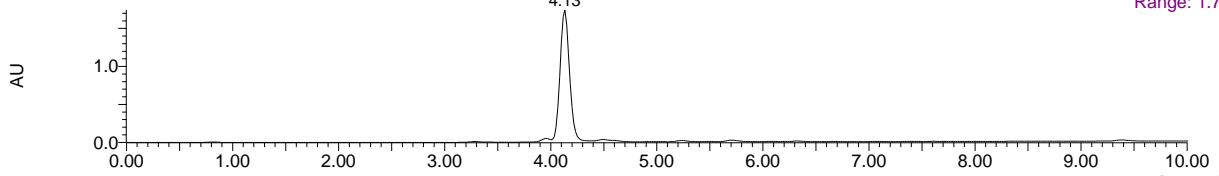

III-101-thiazole-dil3

1: Scan ES+  
TIC  
8.55e7

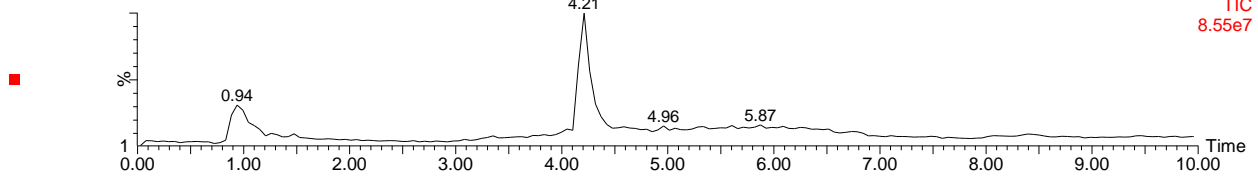

III-101-thiazole-dil3 80 (4.264)

1: Scan ES+  
1.18e7

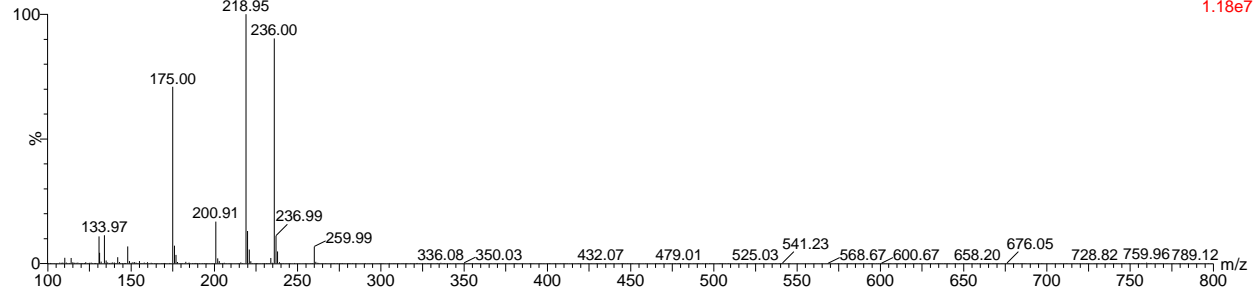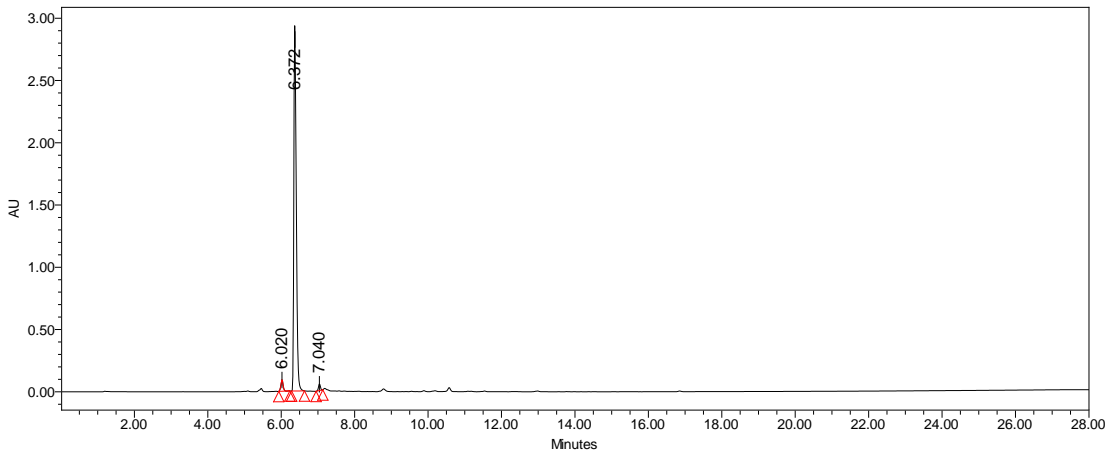

|   | Retention Time | % Area |
|---|----------------|--------|
| 1 | 6.020          | 2.76   |
| 2 | 6.372          | 95.88  |
| 3 | 7.040          | 1.36   |

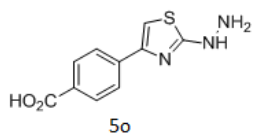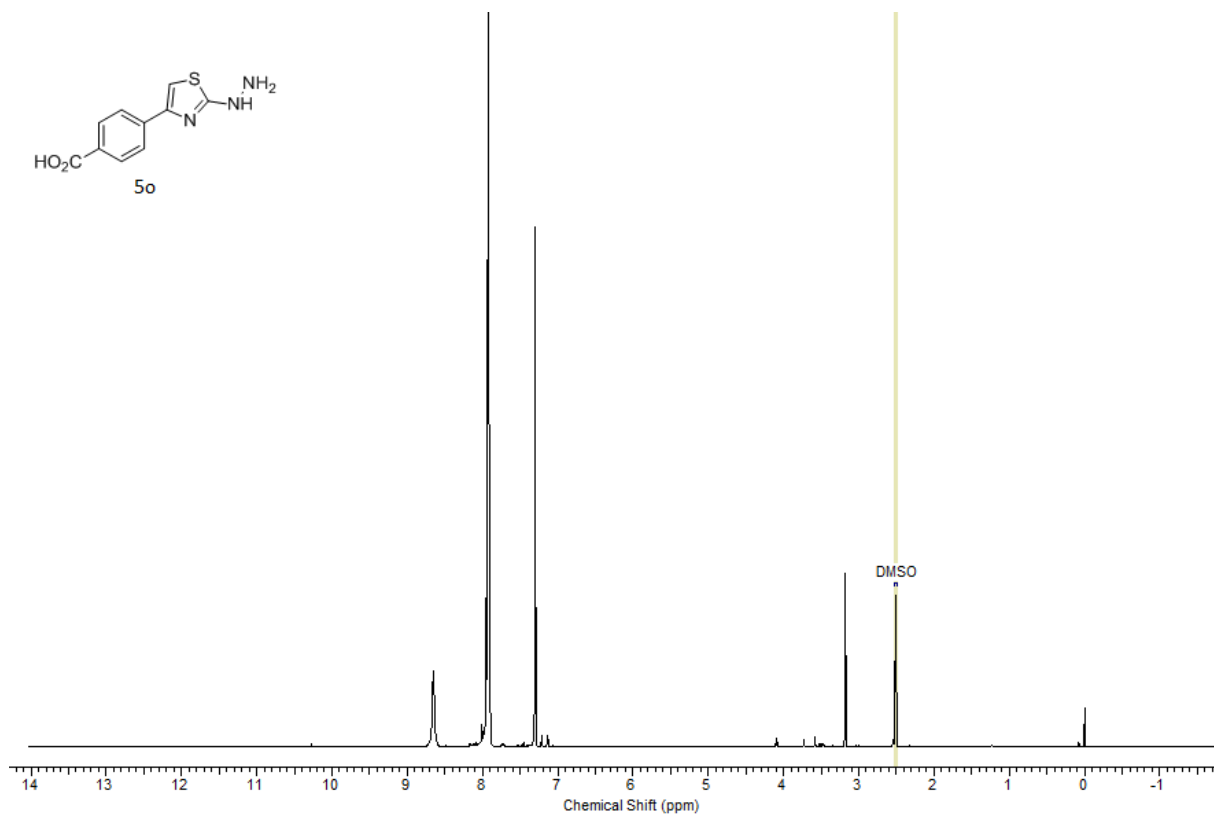

5o

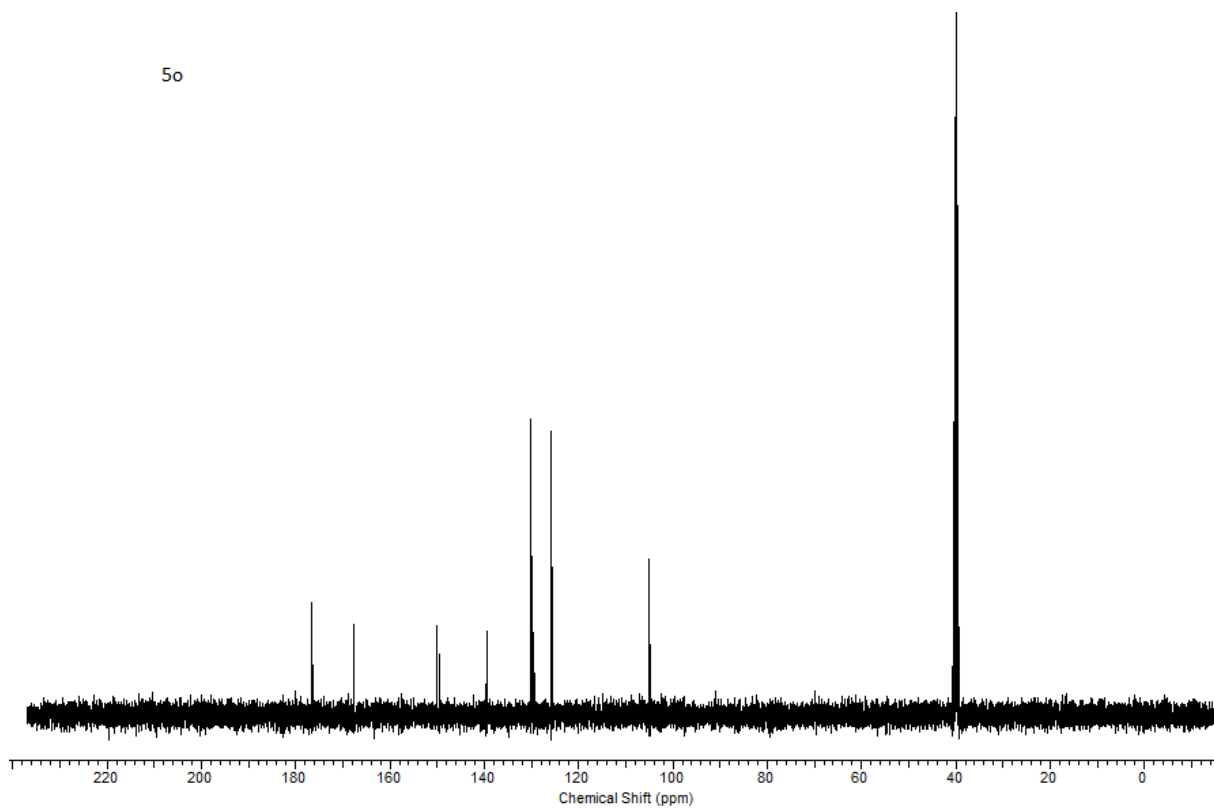

5\*o

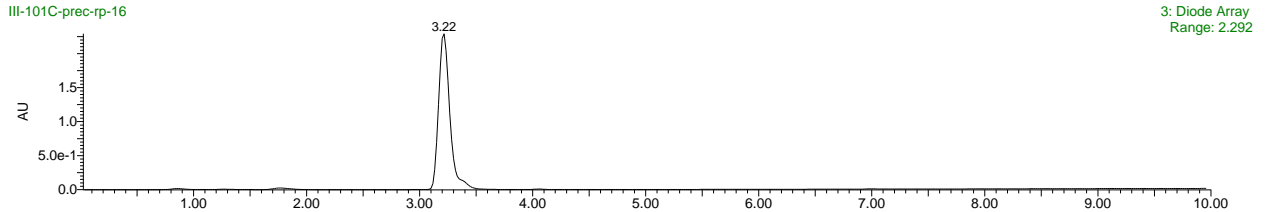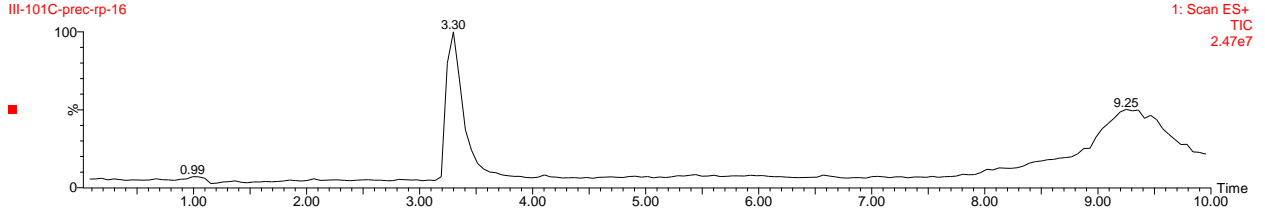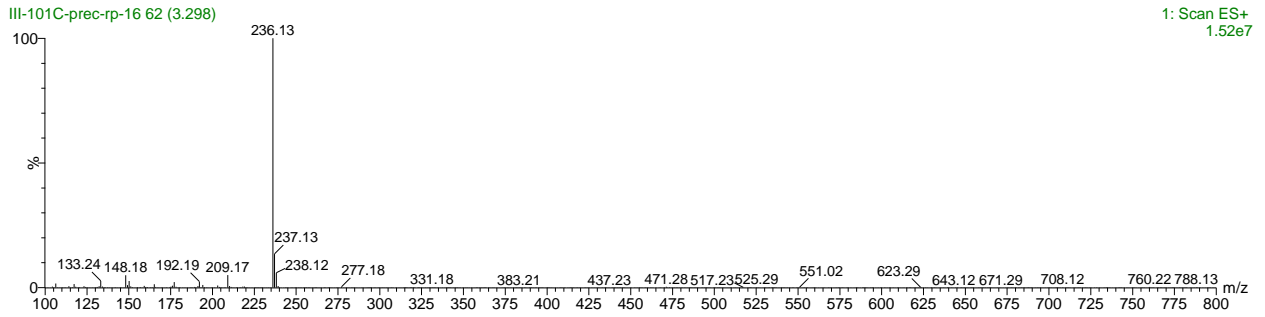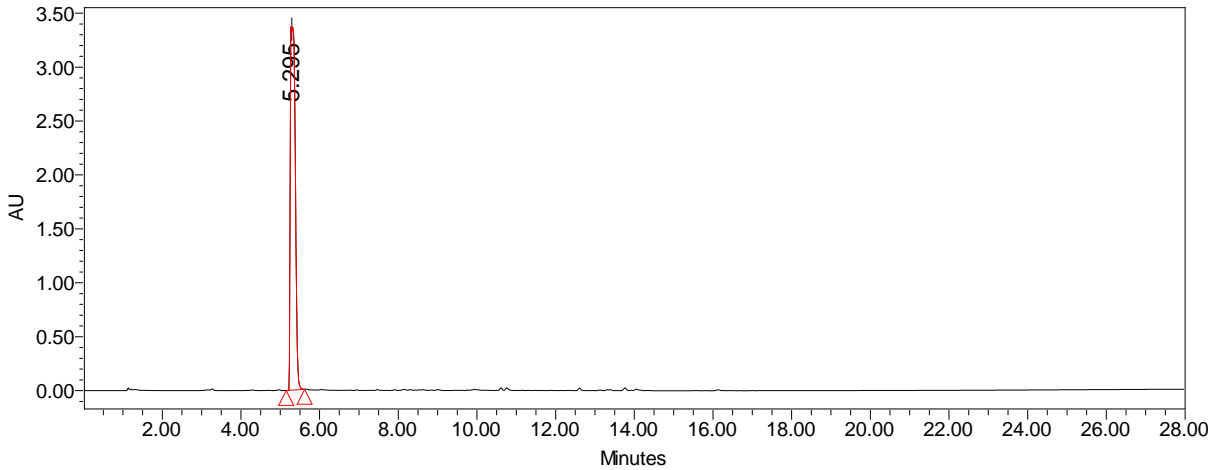

| Retention Time | % Area |
|----------------|--------|
| 5.295          | 100.00 |

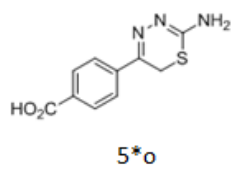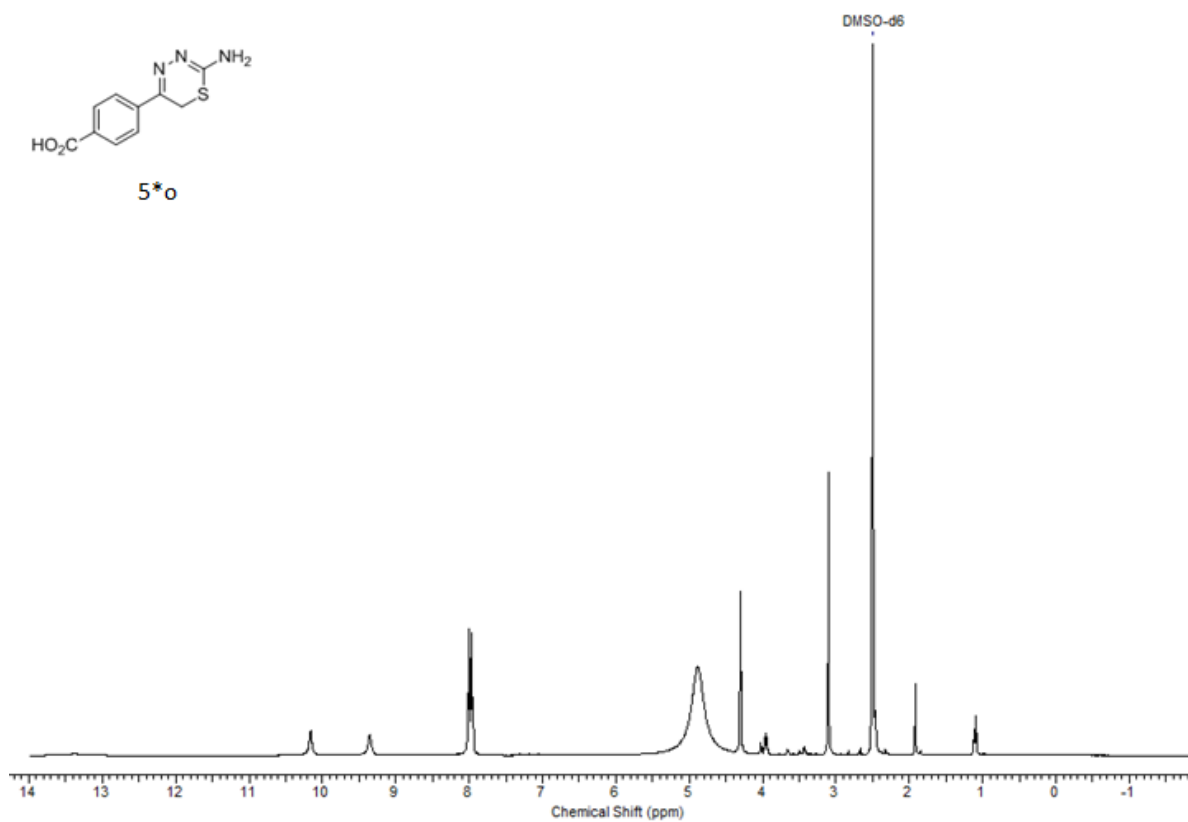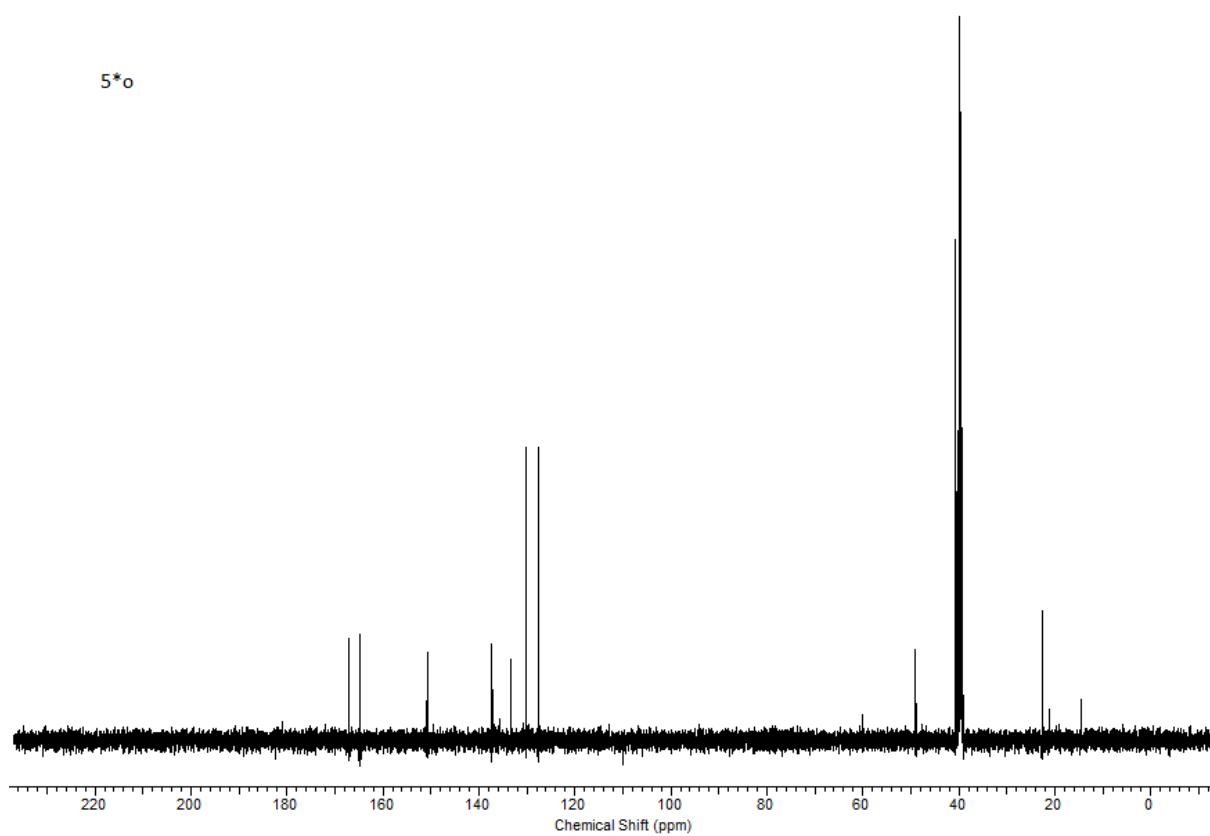

5q

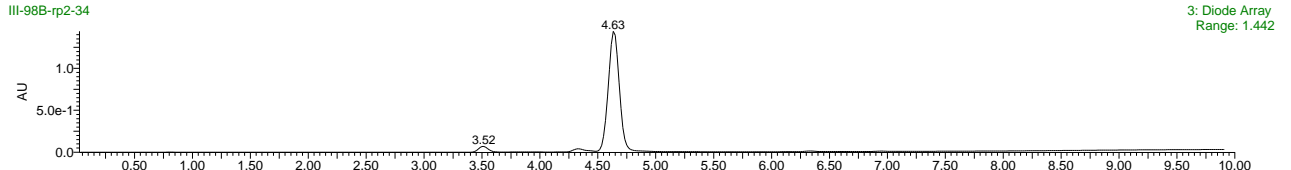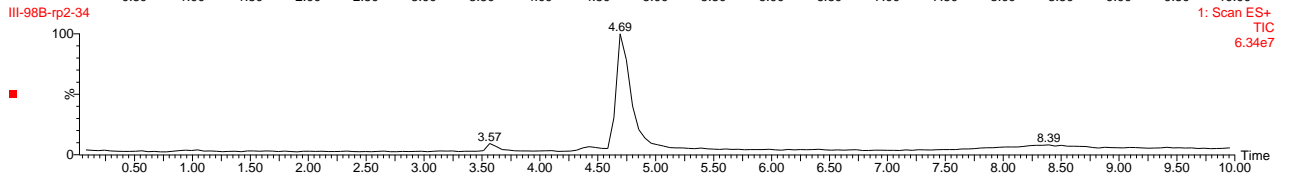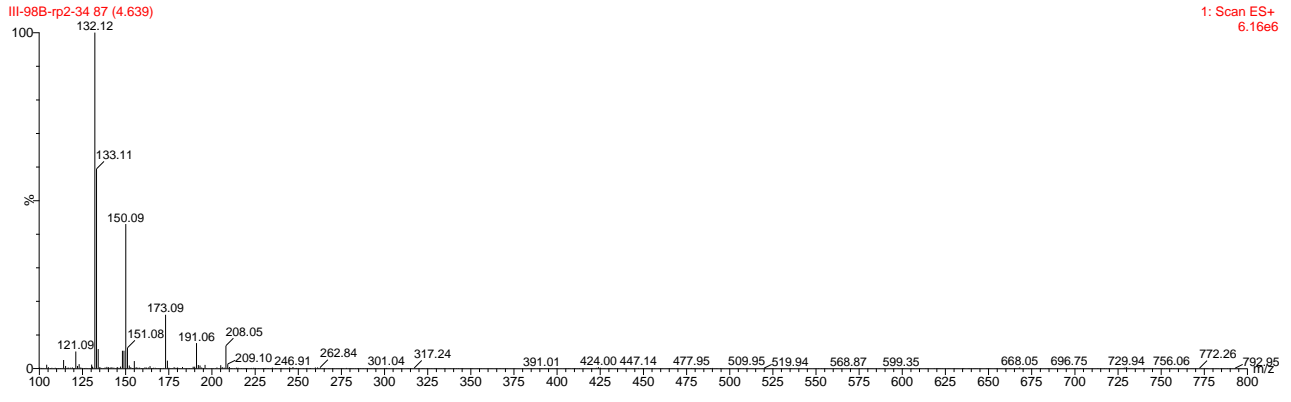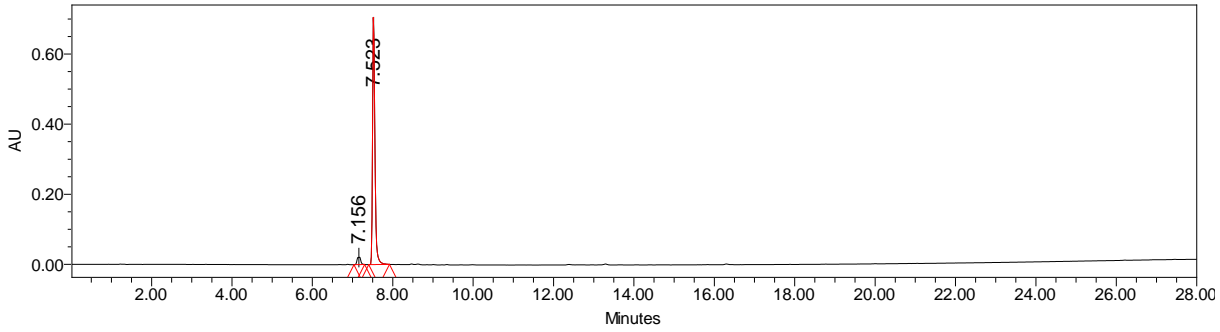

|   | Retention Time | % Area |
|---|----------------|--------|
| 1 | 7.156          | 4.42   |
| 2 | 7.523          | 95.58  |

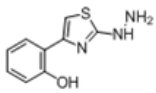

5q

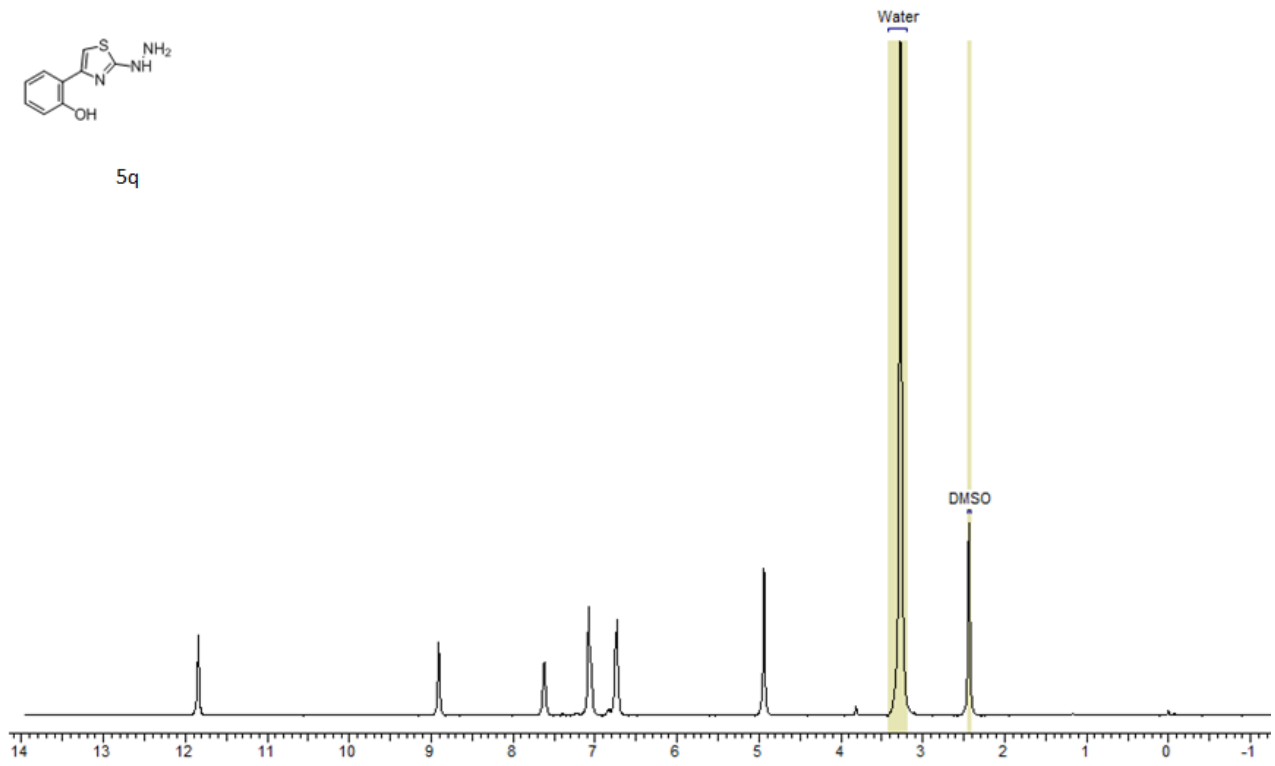

5q

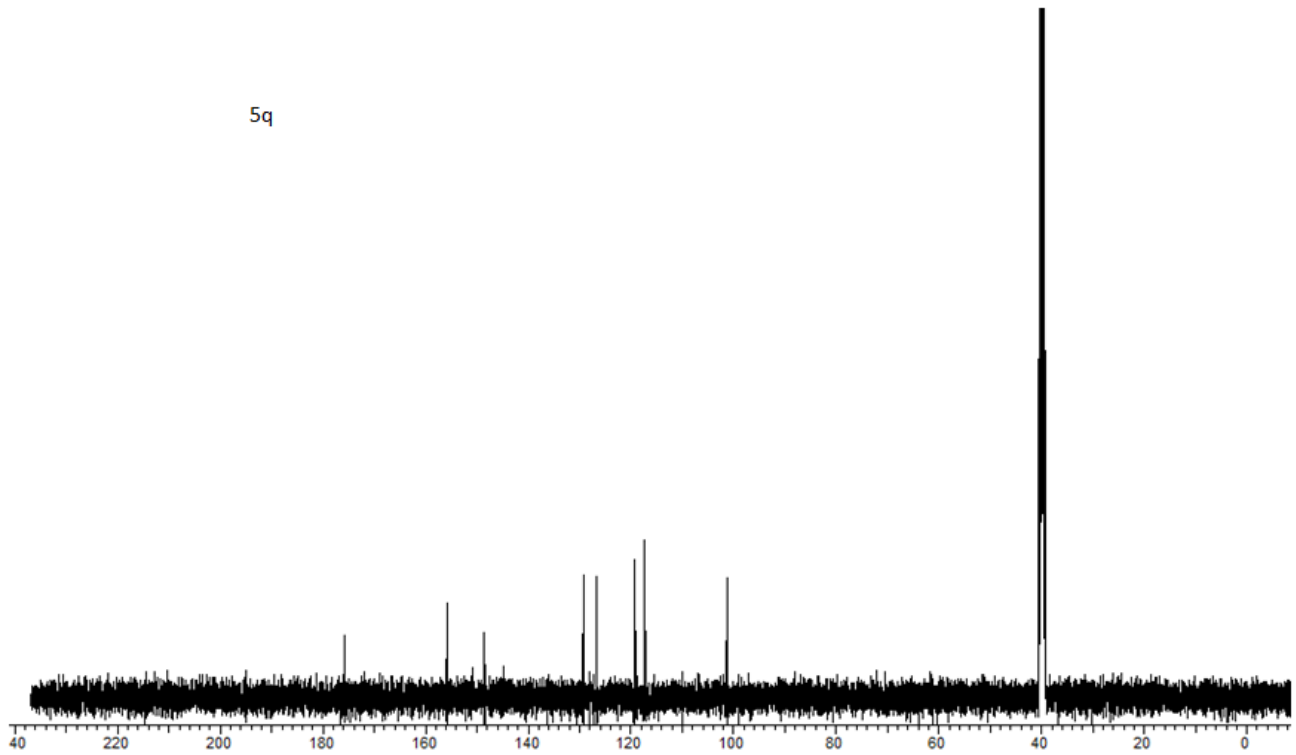



5\*q

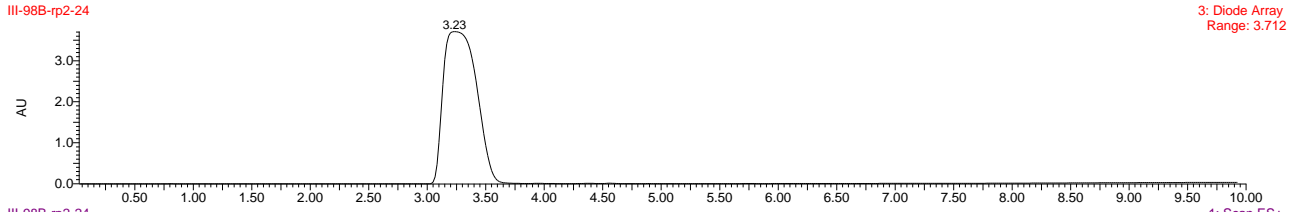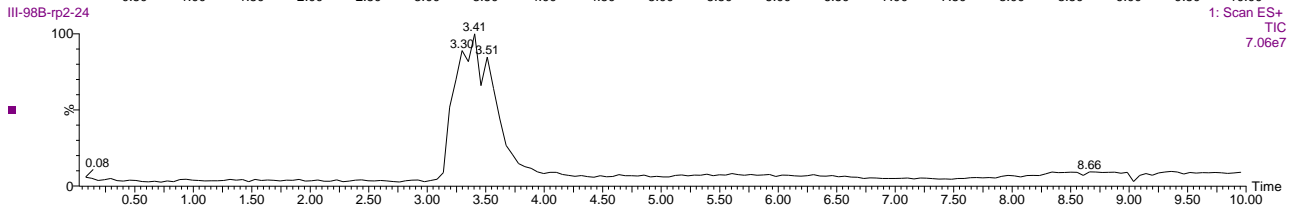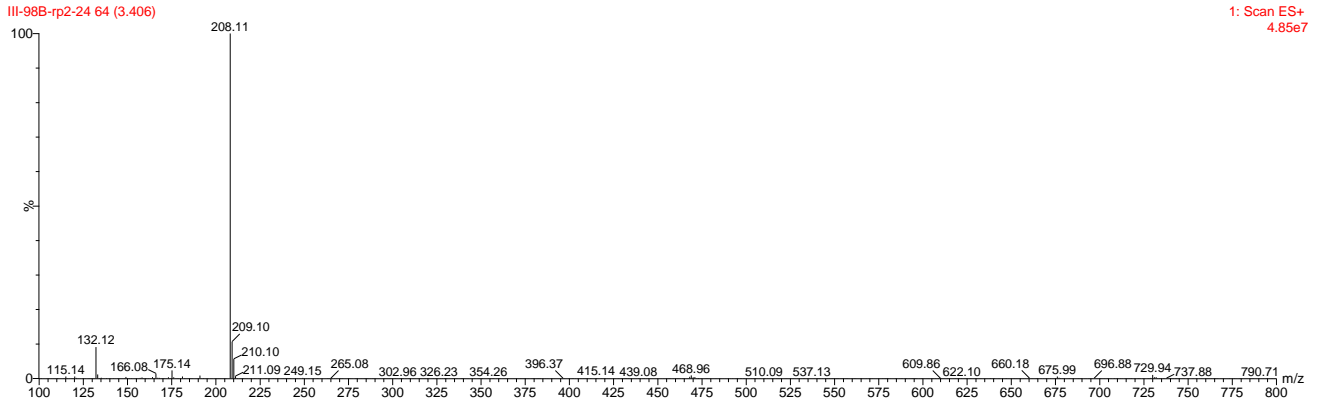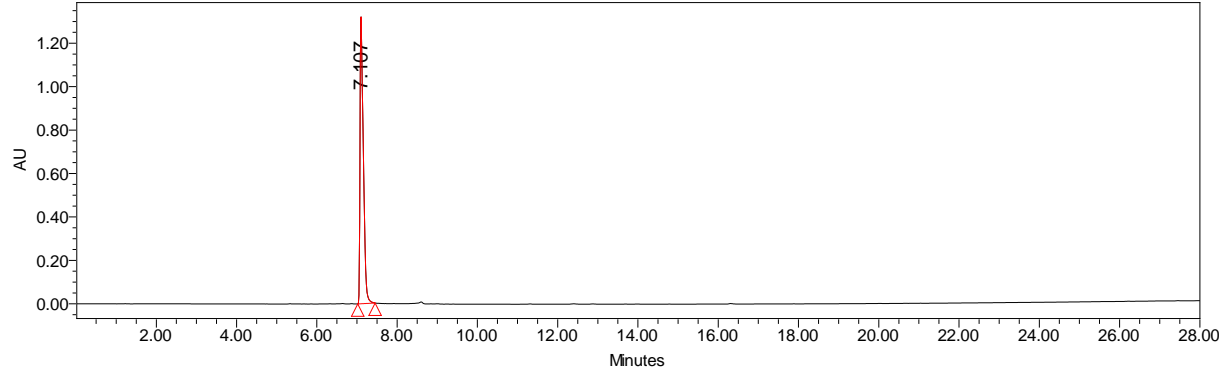

|   | Retention Time | % Area |
|---|----------------|--------|
| 1 | 7.107          | 100.00 |

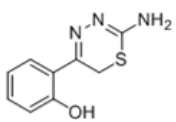

5\*q

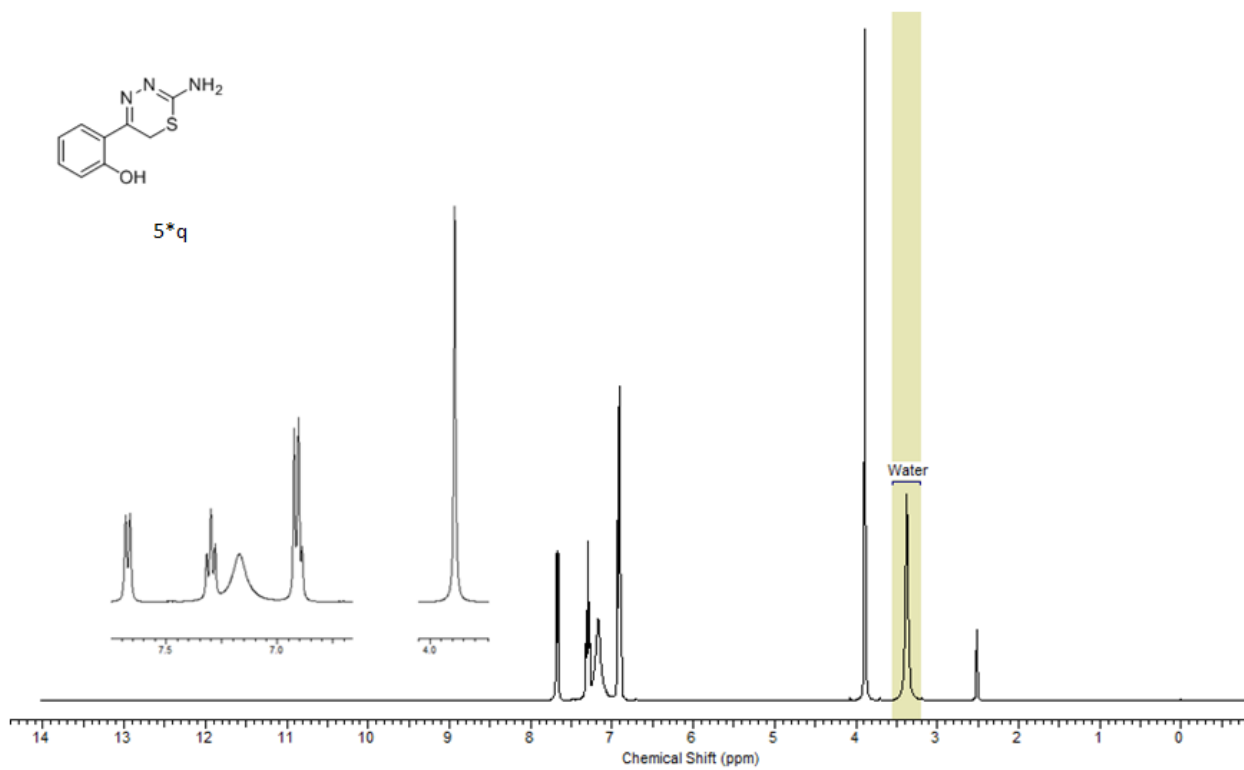

5\*q

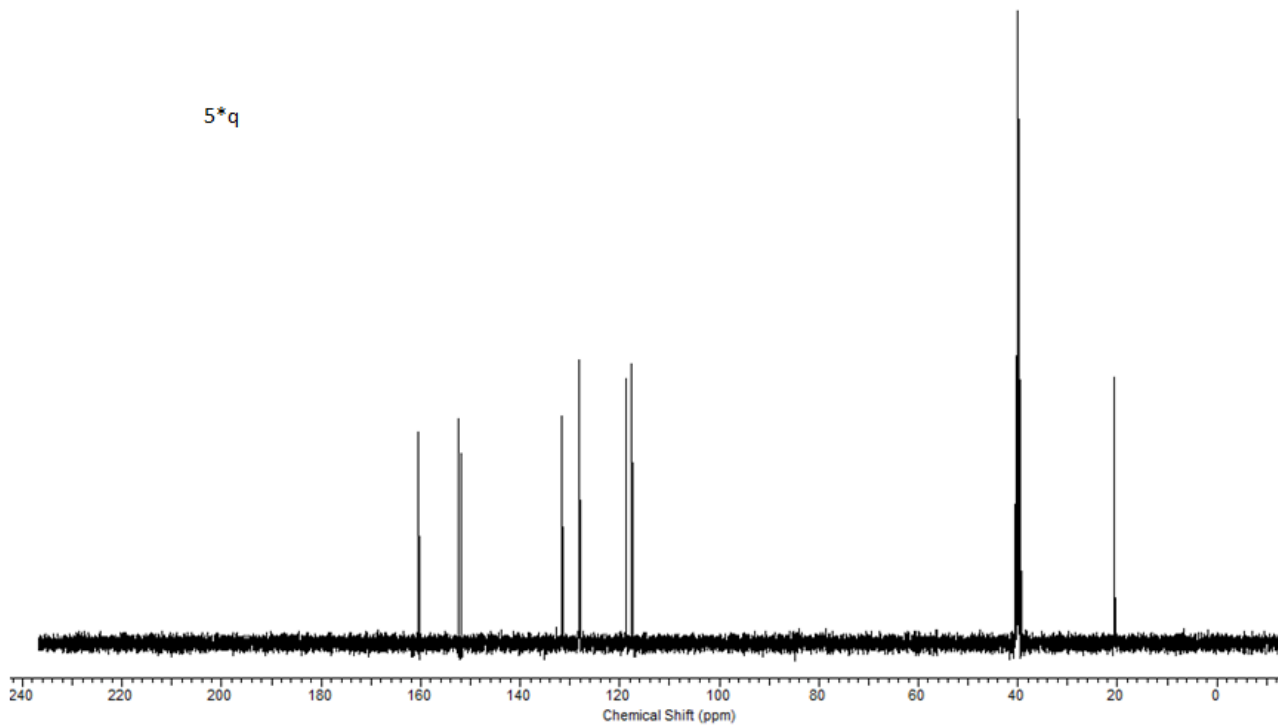

5r

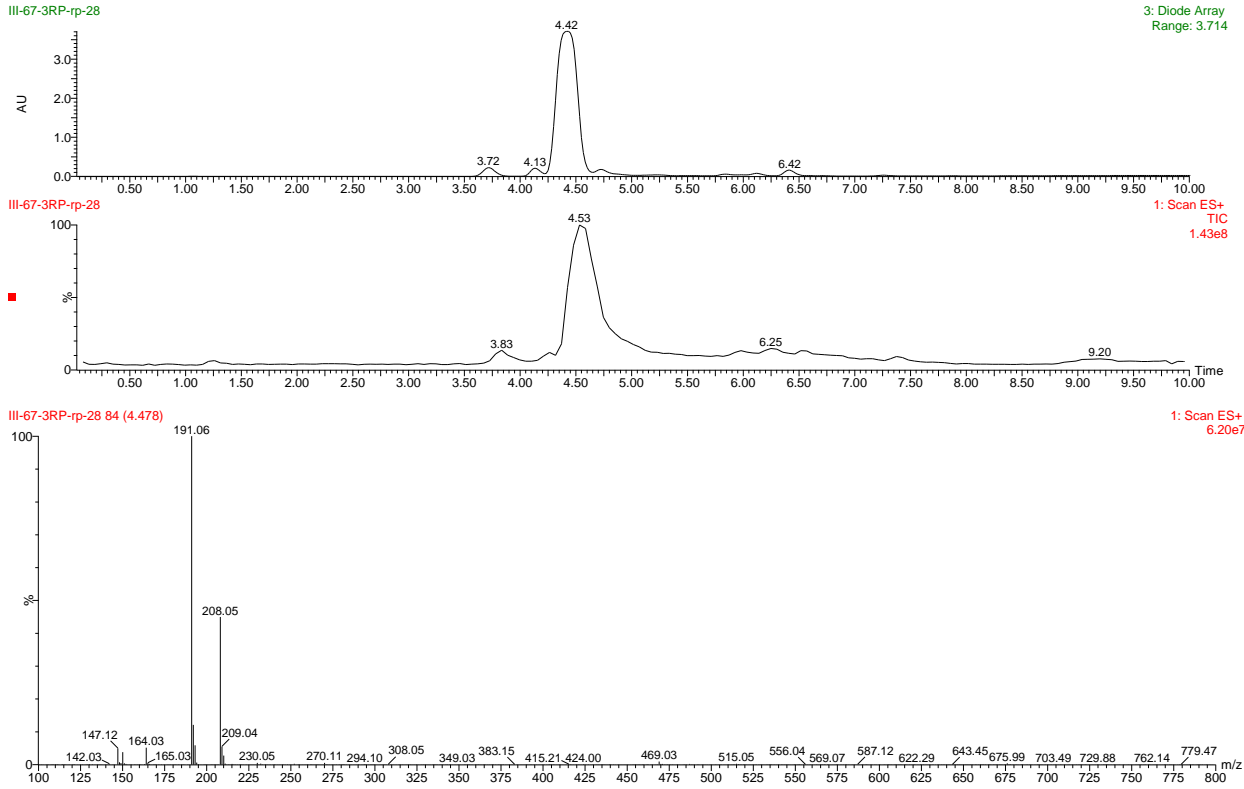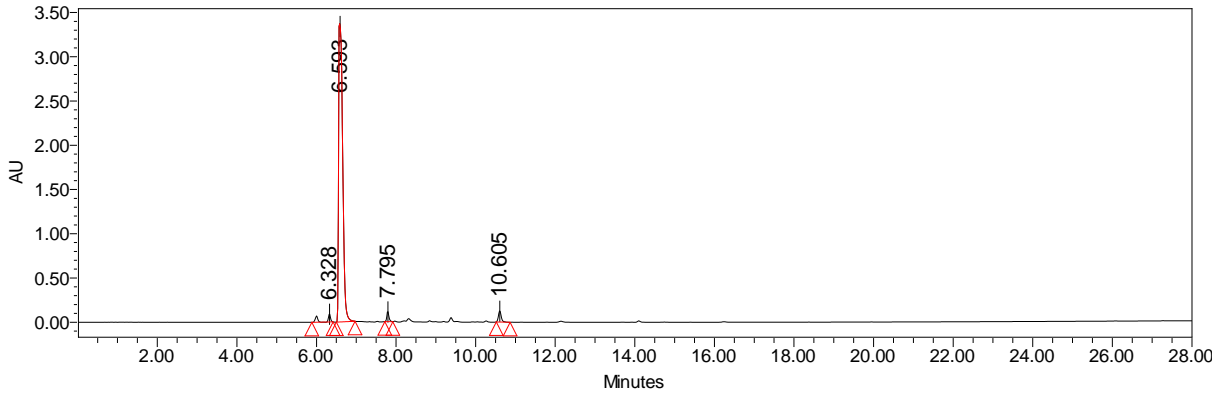

|   | Retention Time | % Area |
|---|----------------|--------|
| 1 | 6.328          | 2.57   |
| 2 | 6.593          | 93.38  |
| 3 | 7.795          | 1.68   |
| 4 | 10.605         | 2.37   |

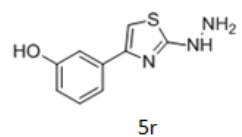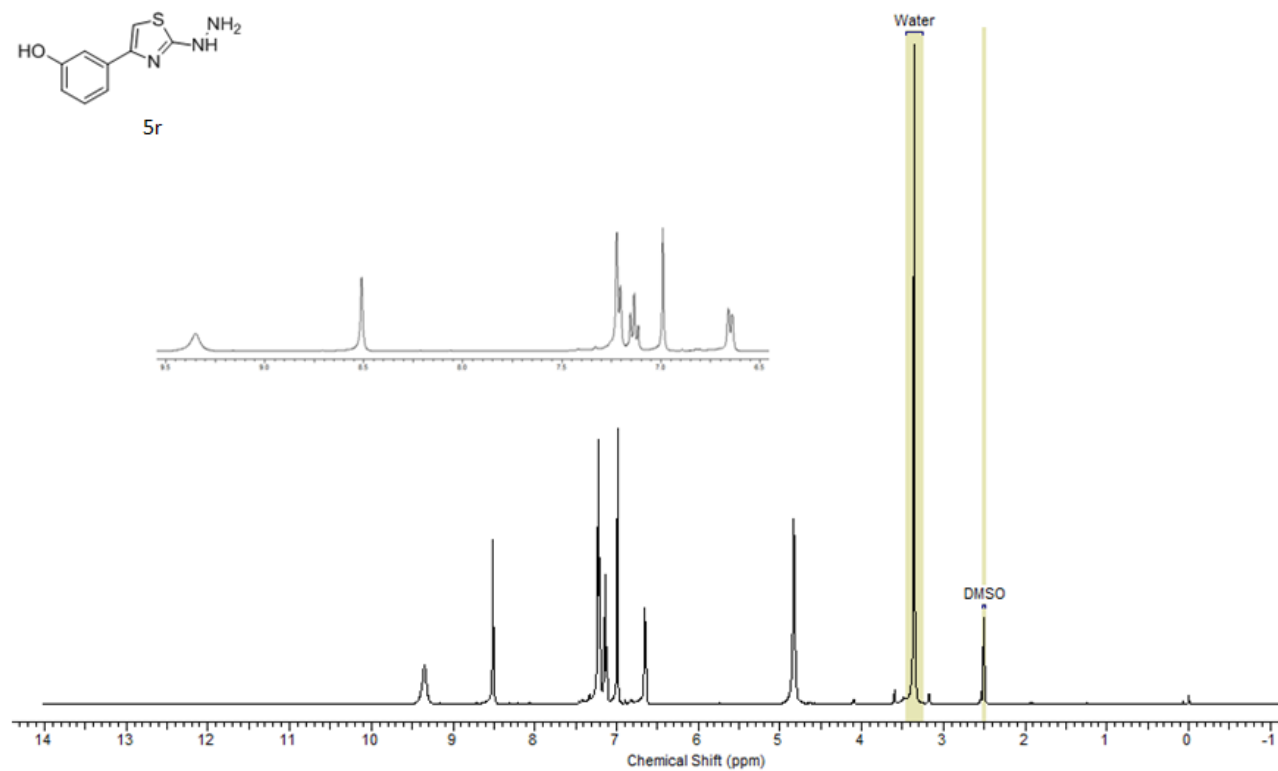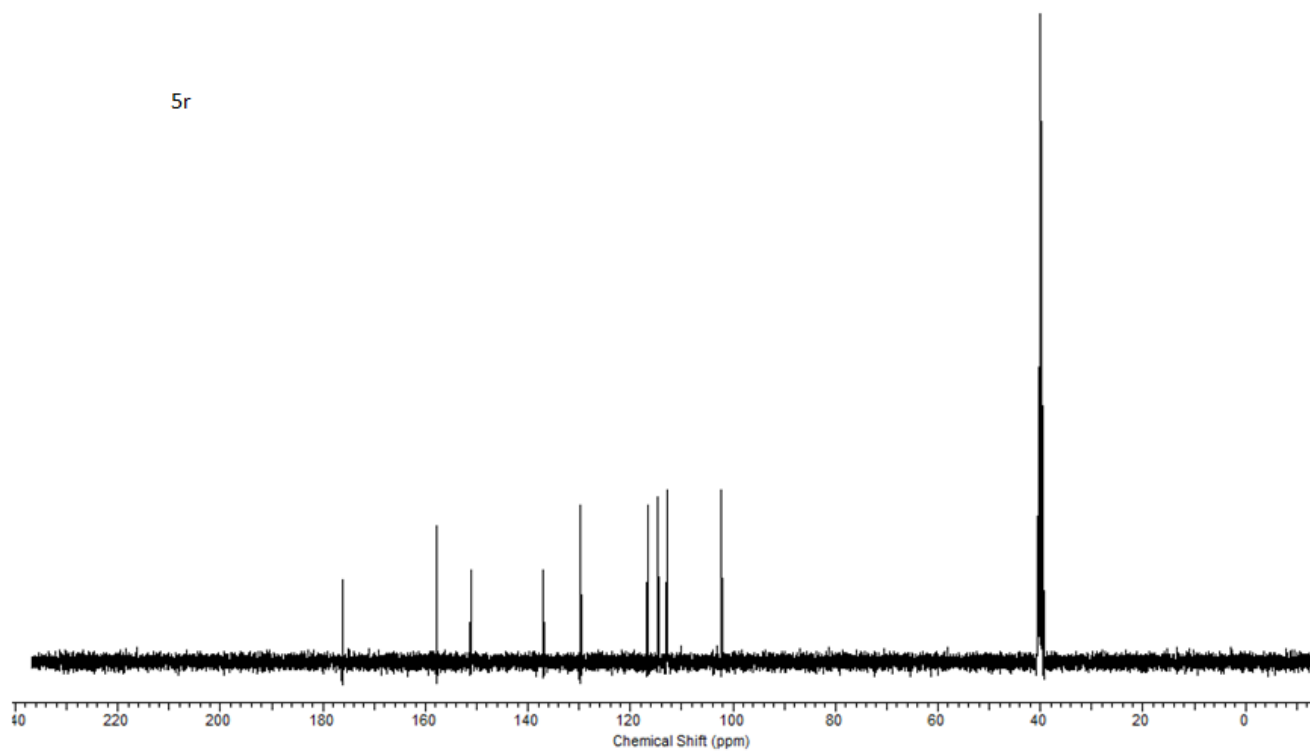

5s

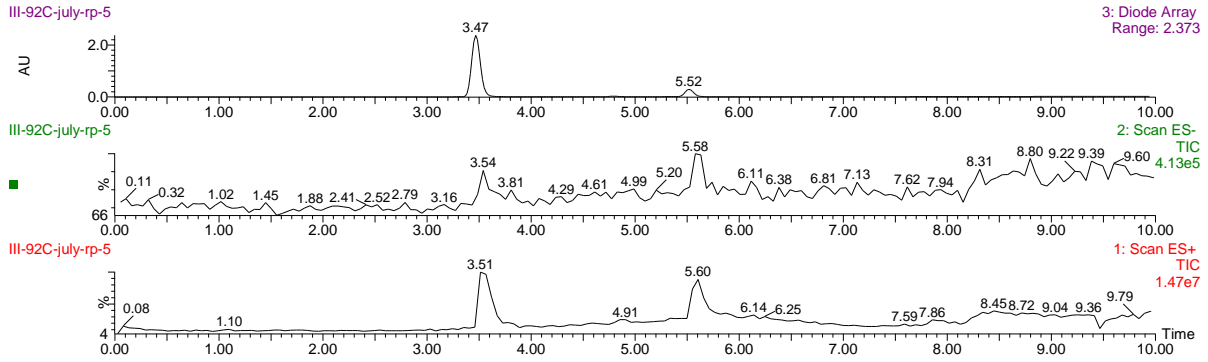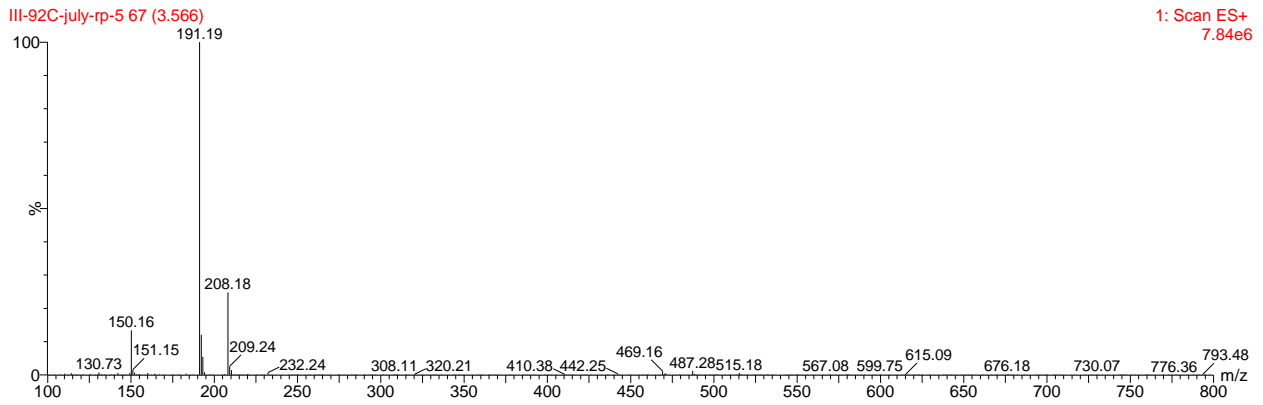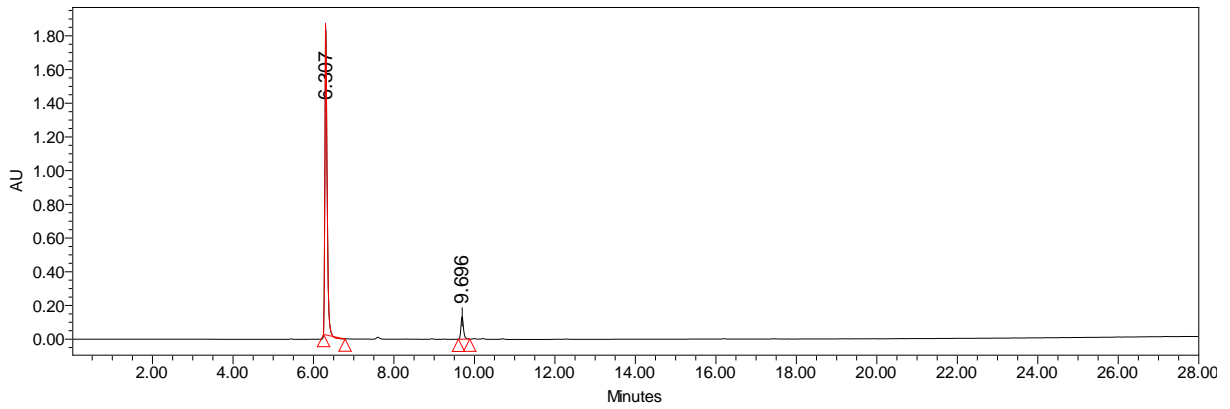

|   | Retention Time | % Area |
|---|----------------|--------|
| 1 | 6.307          | 92.30  |
| 2 | 9.696          | 7.70   |

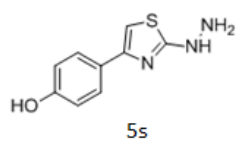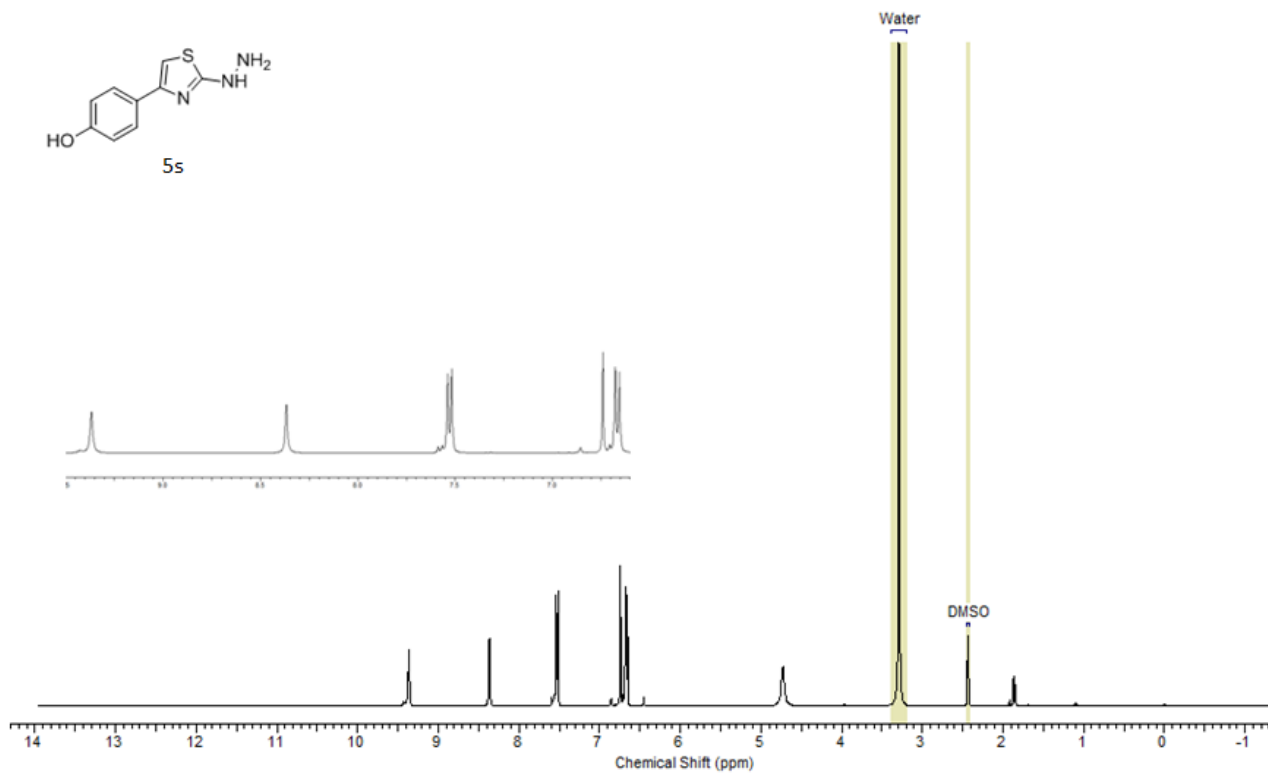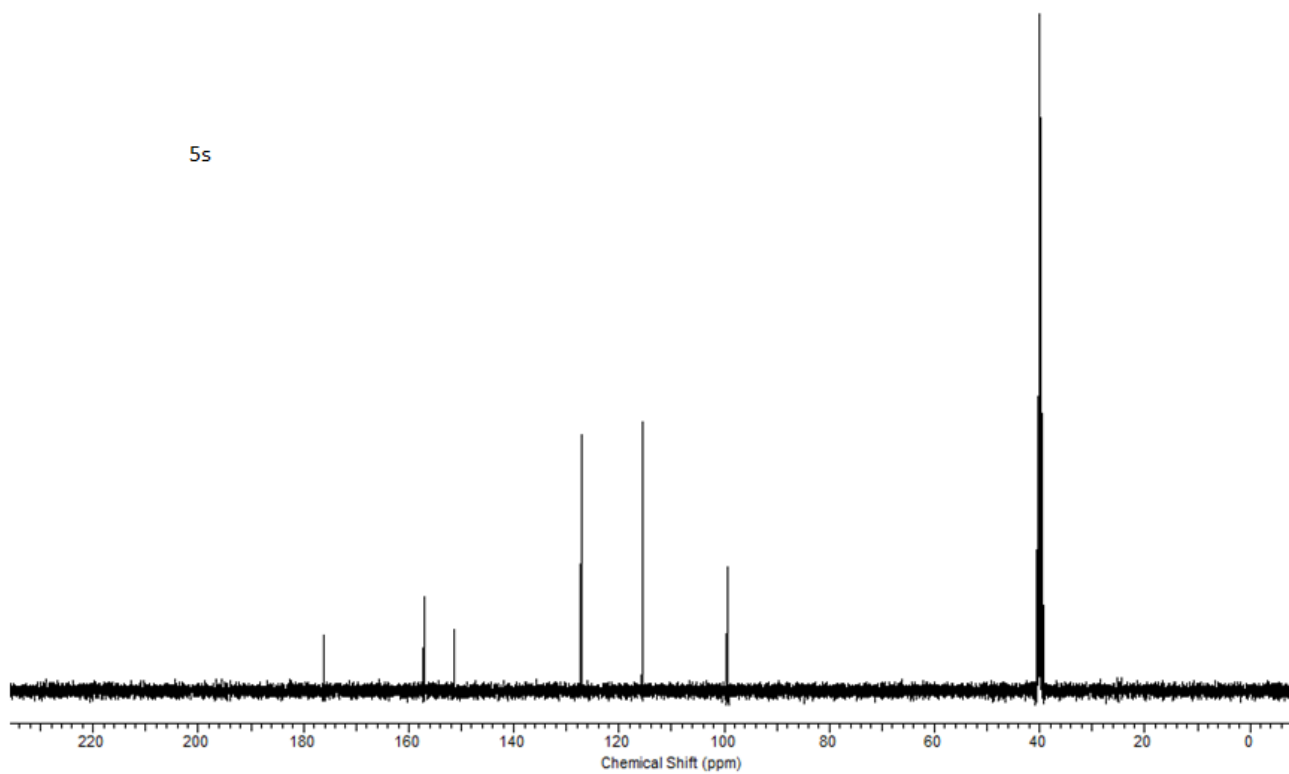

5\*s

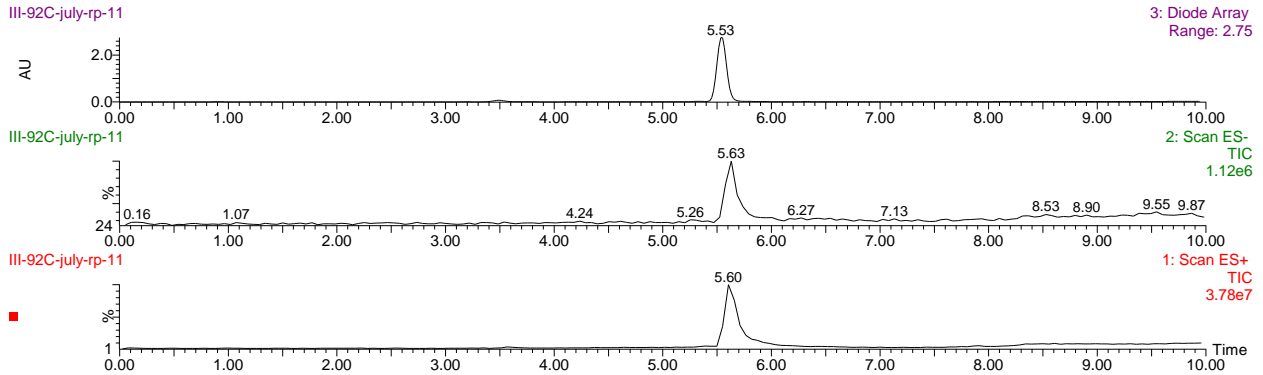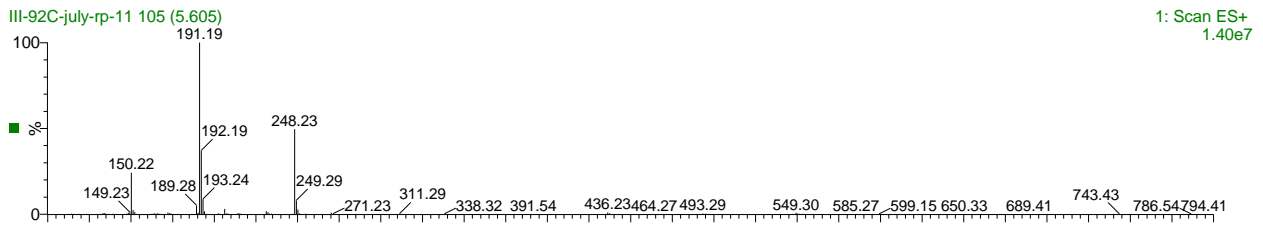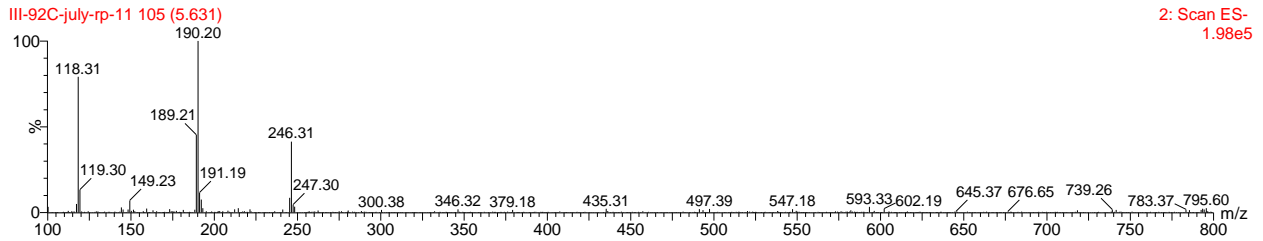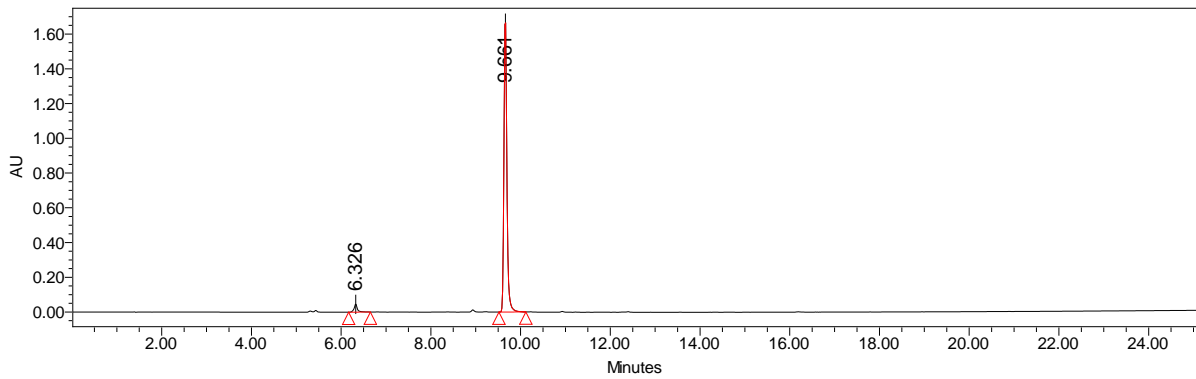

|   | Retention Time | % Area |
|---|----------------|--------|
| 1 | 6.326          | 3.10   |
| 2 | 9.661          | 96.90  |

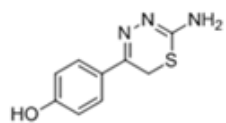

5\*s

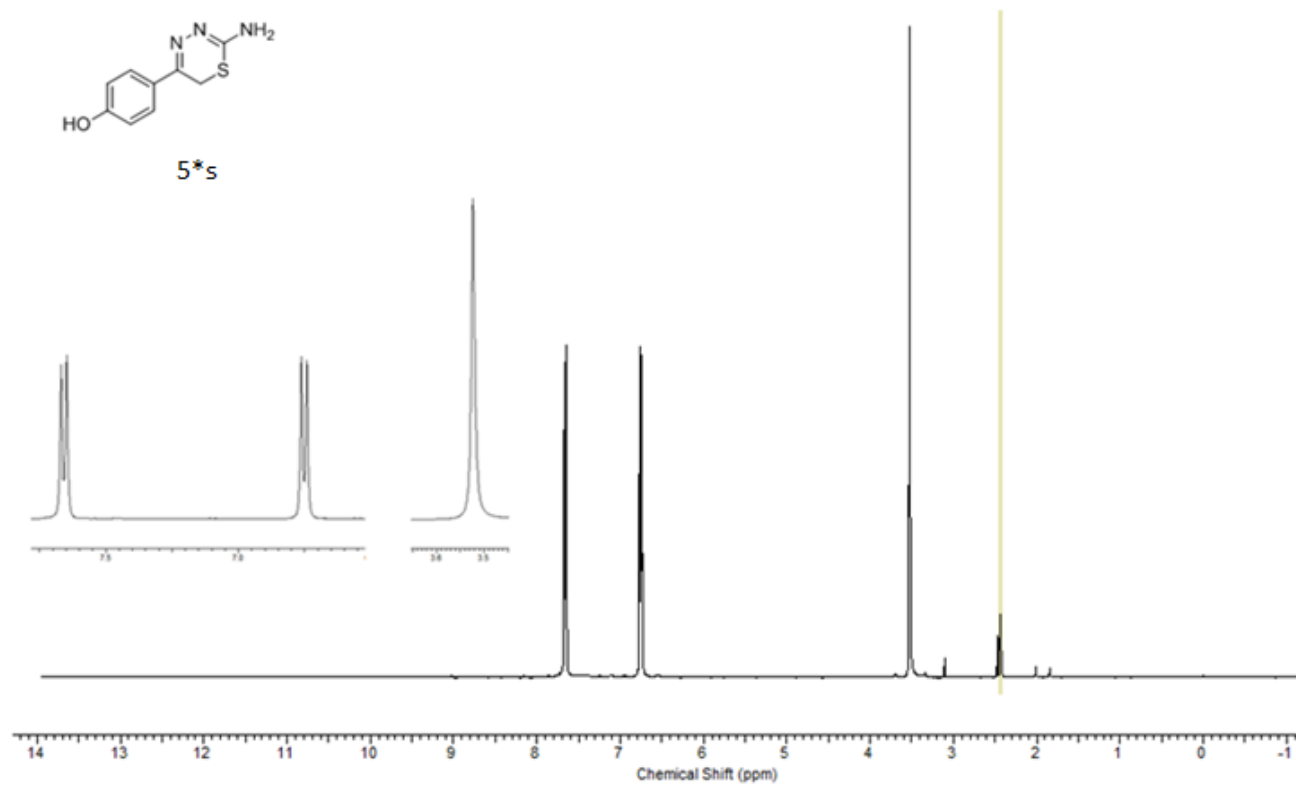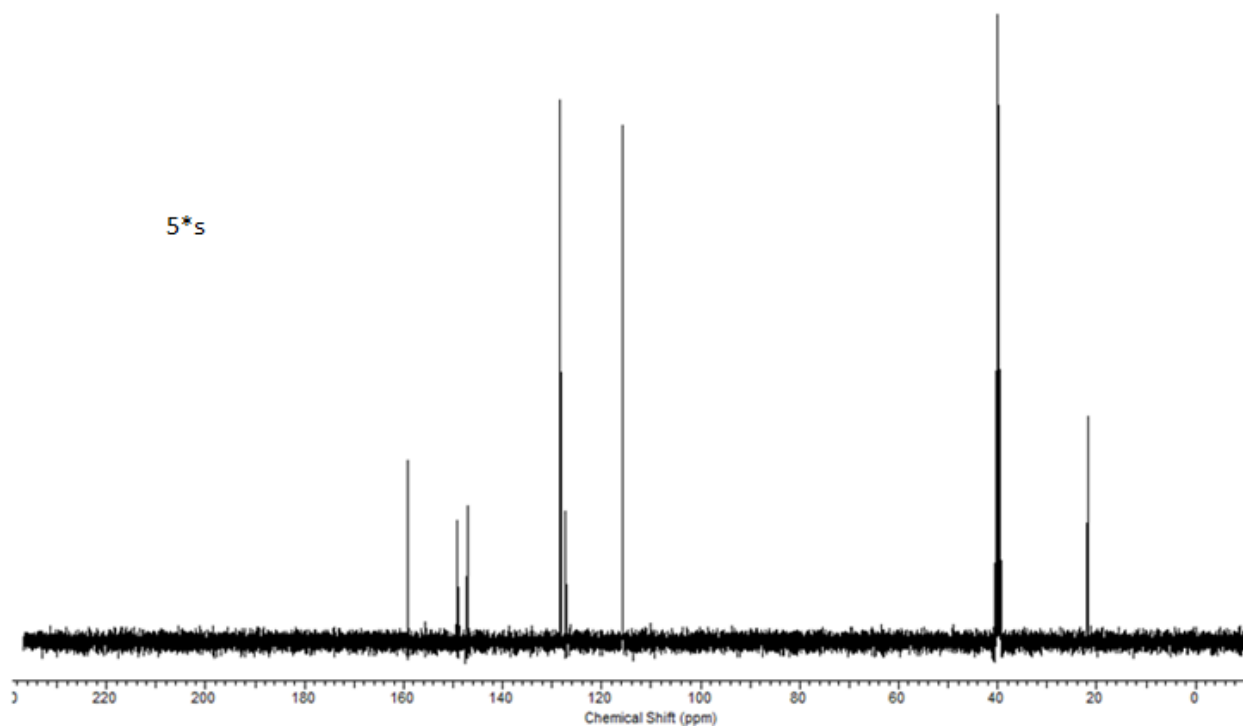



5t

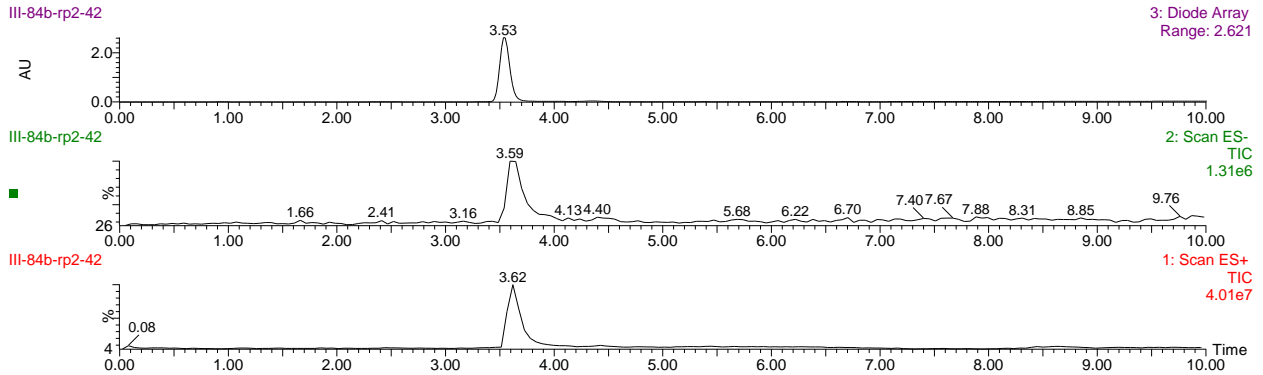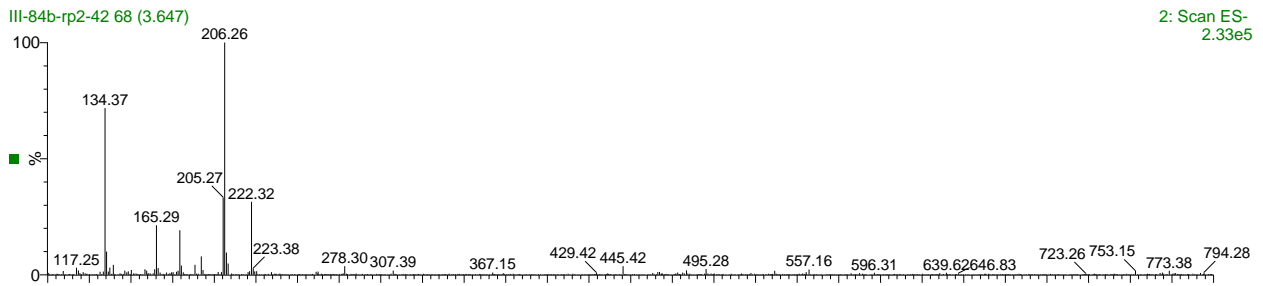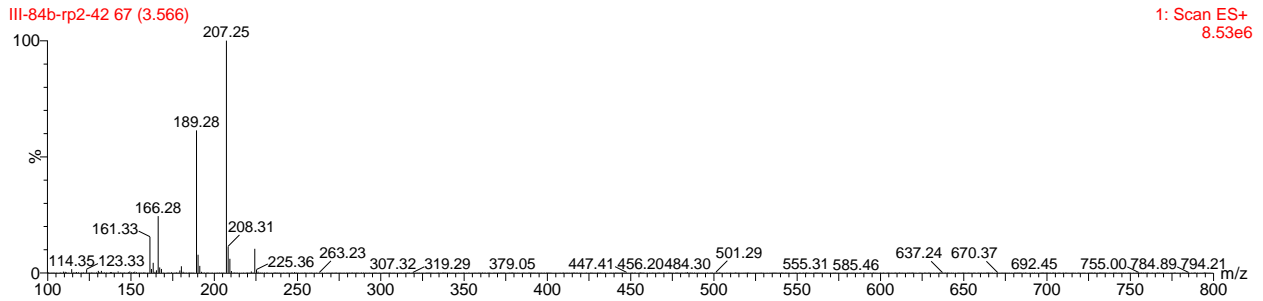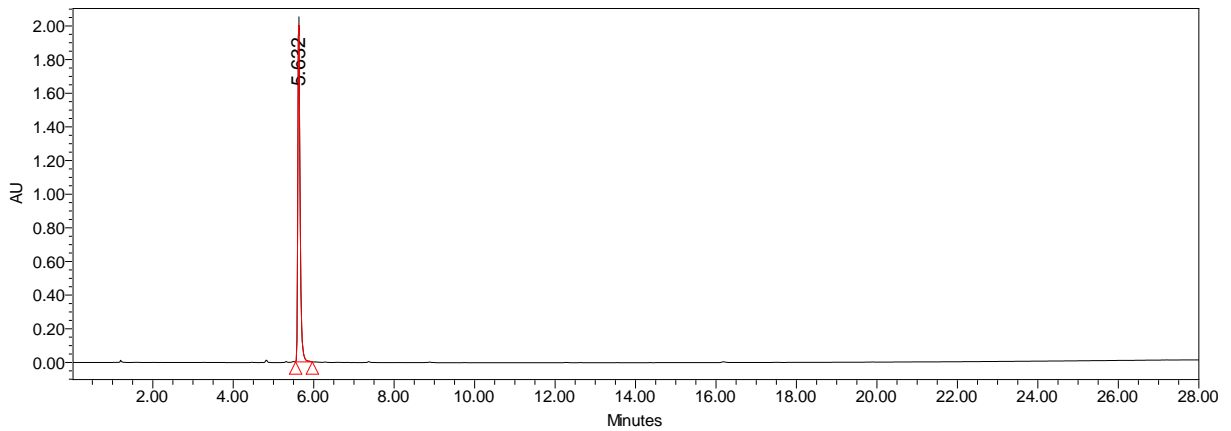

|   | Retention Time | % Area |
|---|----------------|--------|
| 1 | 5.632          | 100.00 |

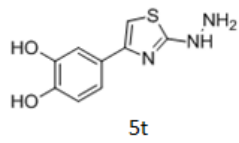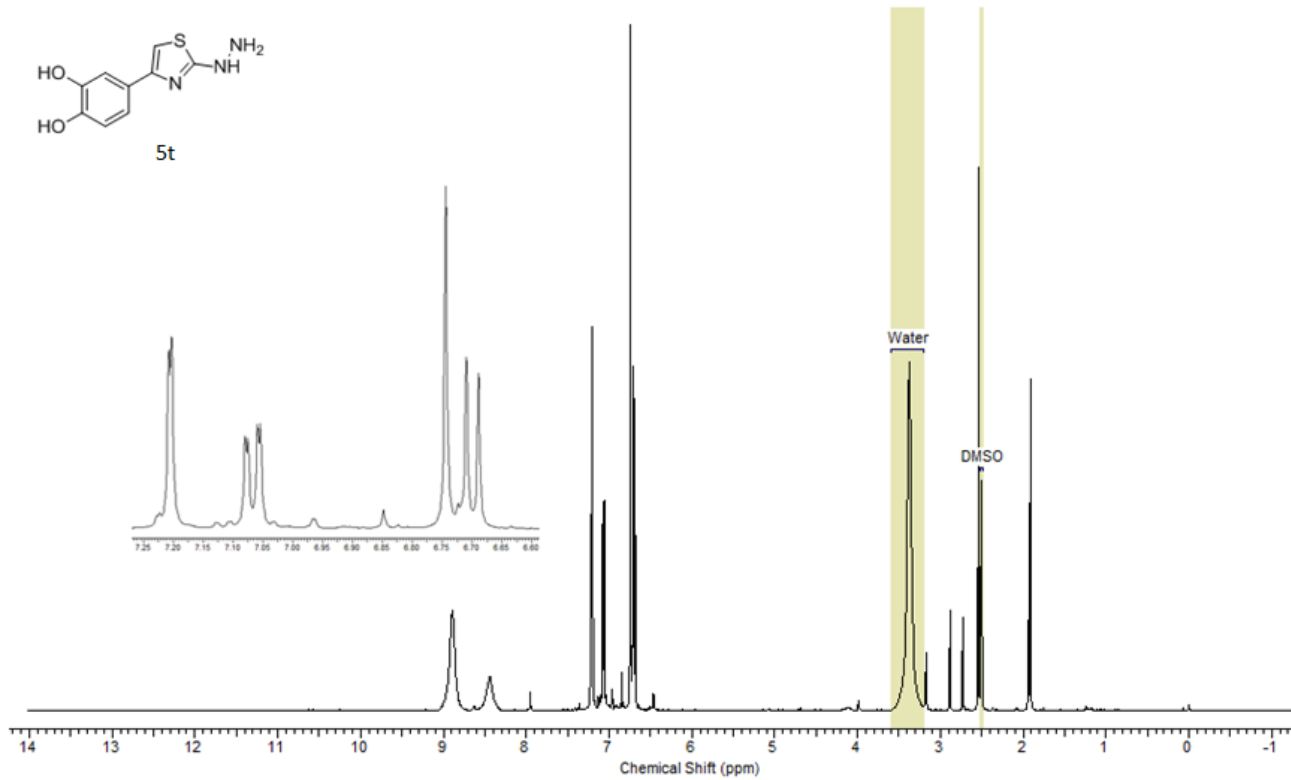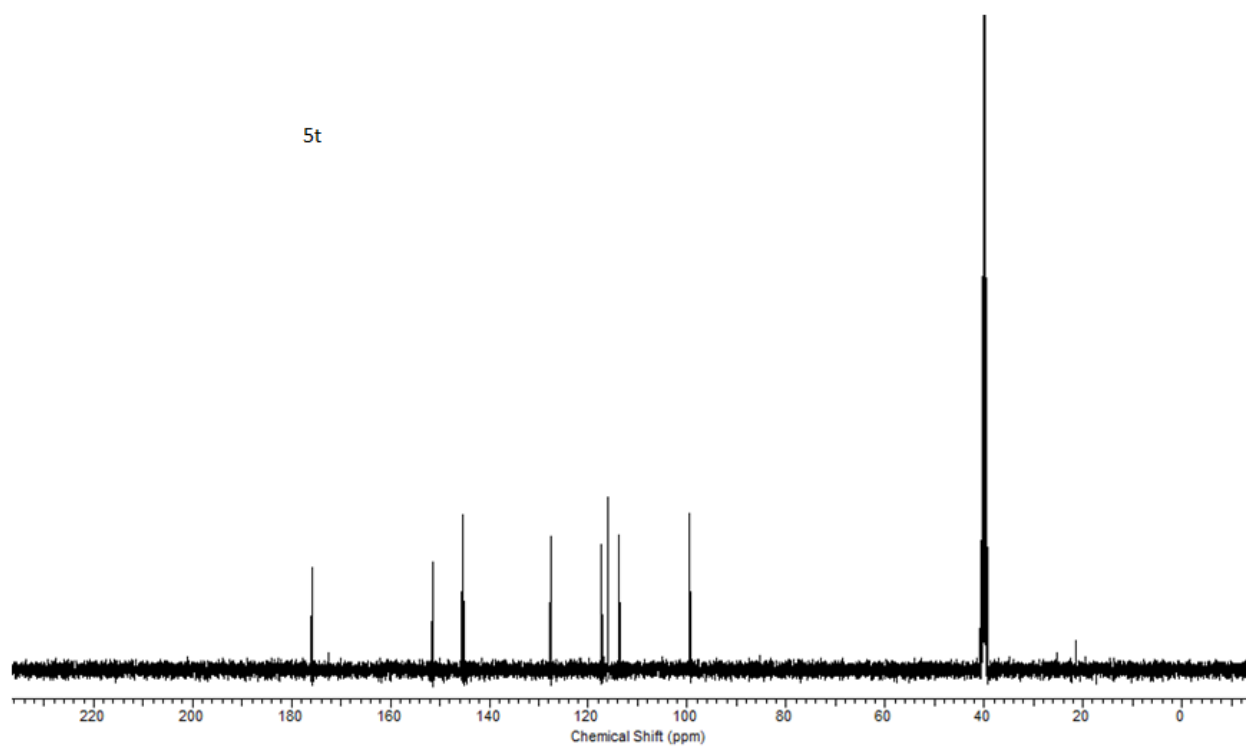

# Biology Supplementary Information

## 1. Pull down assay

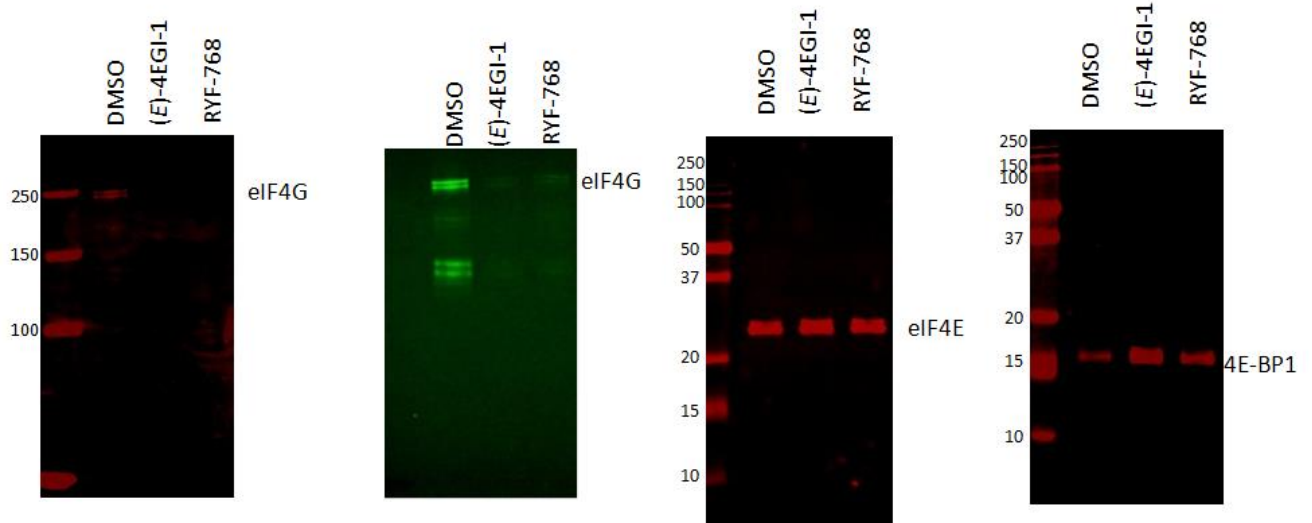

## 2. Effect on the expression of the proteins of the translation initiation machinery:

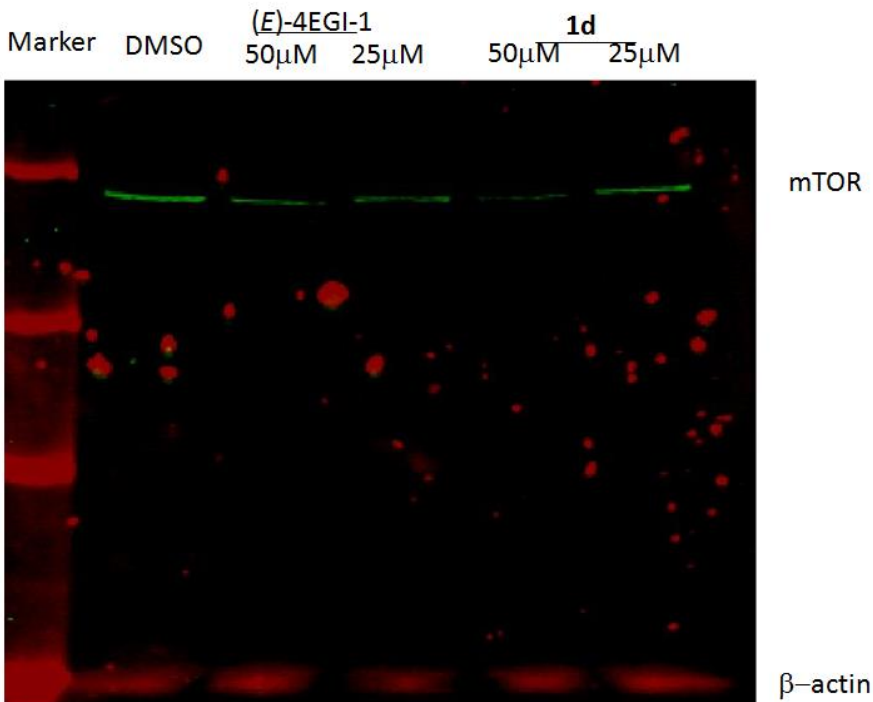

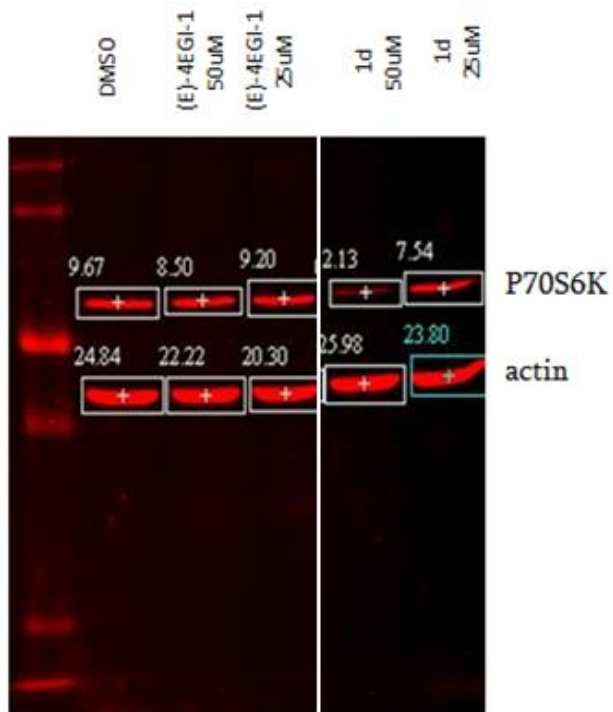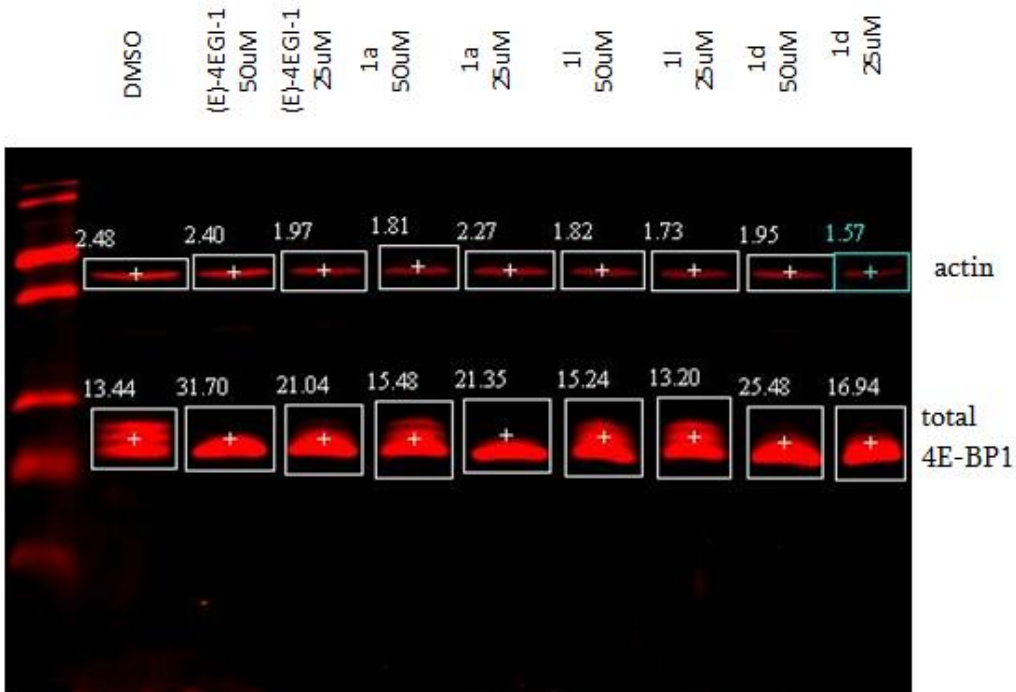

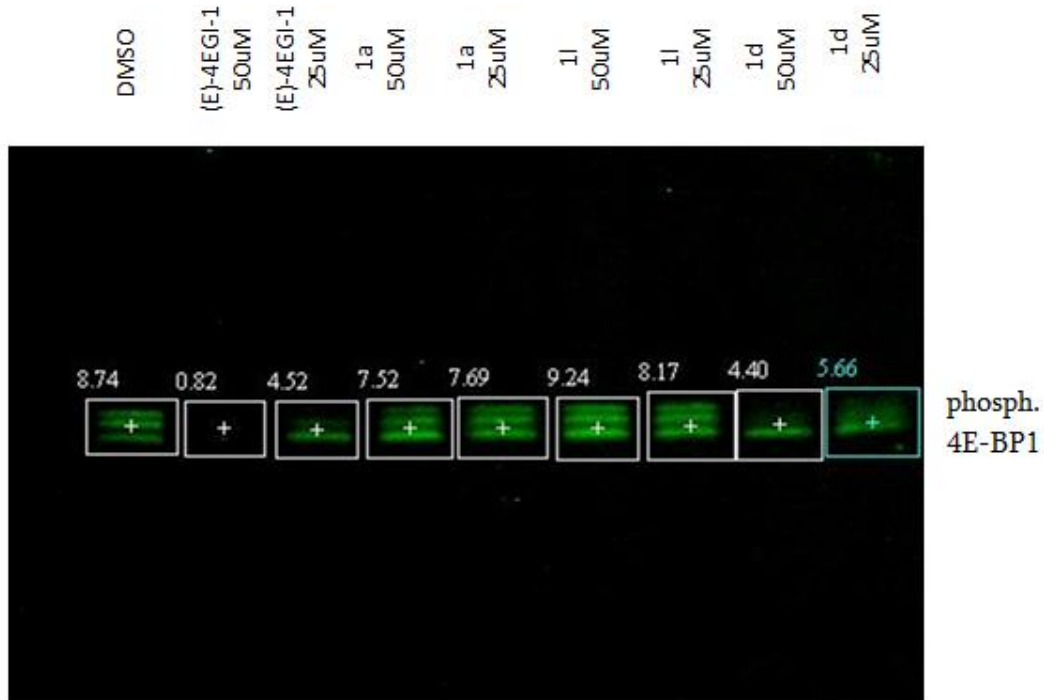

**3. Effect on the expression of the oncogenic and housekeeping proteins :**

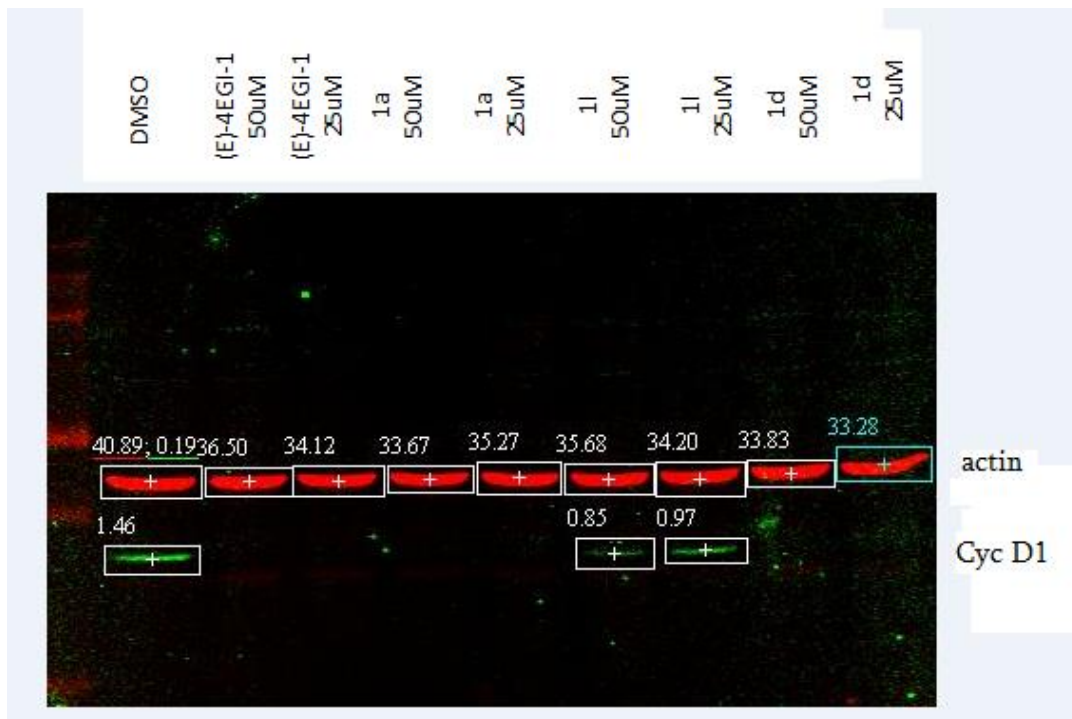

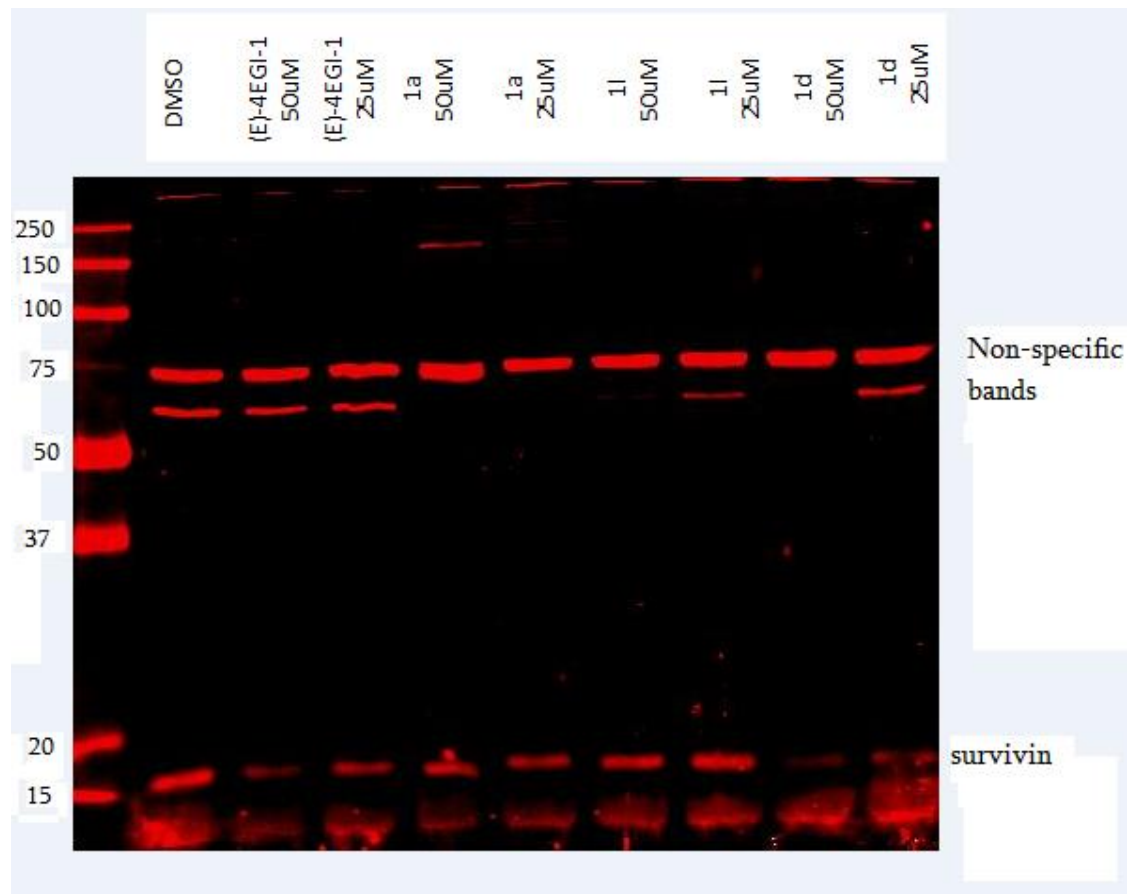

Supplement: NIHMS566577-supplement-Supporting_Information.pdf [file NIHMS566577-supplement-Supporting_Information.pdf]
